# Supplementary material for: Evaluating costs and health consequences of sick leave strategies against pandemic and seasonal influenza in Norway using a dynamic model
Source: PubMed Central journal article supplement — BMJ Open. 2019 Apr 3;9(4):e027832. doi: 10.1136/bmjopen-2018-027832 (PMC6500216; doi:10.1136/bmjopen-2018-027832), 2019-04-03
Supplement: bmjopen-2018-027832.reviewer_comments.pdf [file bmjopen-2018-027832.reviewer_comments.pdf]

# BMJ Open

BMJ Open is committed to open peer review. As part of this commitment we make the peer review history of every article we publish publicly available.

When an article is published we post the peer reviewers' comments and the authors' responses online. We also post the versions of the paper that were used during peer review. These are the versions that the peer review comments apply to.

The versions of the paper that follow are the versions that were submitted during the peer review process. They are not the versions of record or the final published versions. They should not be cited or distributed as the published version of this manuscript.

BMJ Open is an open access journal and the full, final, typeset and author-corrected version of record of the manuscript is available on our site with no access controls, subscription charges or pay-per-view fees (<http://bmjopen.bmj.com>).

If you have any questions on BMJ Open's open peer review process please email [editorial.bmjopen@bmj.com](mailto:editorial.bmjopen@bmj.com)

# BMJ Open

## Evaluating costs and health consequences of sick leave strategies against pandemic and seasonal influenza in Norway using a dynamic model

|                               |                                                                                                                                                                                                                                                                                                                                            |
|-------------------------------|--------------------------------------------------------------------------------------------------------------------------------------------------------------------------------------------------------------------------------------------------------------------------------------------------------------------------------------------|
| Journal:                      | <i>BMJ Open</i>                                                                                                                                                                                                                                                                                                                            |
| Manuscript ID                 | bmjopen-2018-027832                                                                                                                                                                                                                                                                                                                        |
| Article Type:                 | Research                                                                                                                                                                                                                                                                                                                                   |
| Date Submitted by the Author: | 09-Nov-2018                                                                                                                                                                                                                                                                                                                                |
| Complete List of Authors:     | Hansen Edwards, Christina; Nasjonalt folkehelseinstitutt, Tomba, Gianpaolo; Universita degli Studi di Roma La Sapienza, Dept. of Mathematics<br>Sonbo Kristiansen, Ivar; University of Oslo, Health Management and Health Economics<br>White, Richard; Nasjonalt folkehelseinstitutt<br>de Blasio, Birgitte; Nasjonalt folkehelseinstitutt |
| Keywords:                     | Human influenza, Infection control < INFECTIOUS DISEASES, Epidemiology < INFECTIOUS DISEASES, Public health < INFECTIOUS DISEASES, HEALTH ECONOMICS                                                                                                                                                                                        |
|                               |                                                                                                                                                                                                                                                                                                                                            |

SCHOLARONE™  
Manuscripts

1  
2  
3  
4 **Evaluating costs and health consequences of sick leave strategies**  
5  
6  
7 **against pandemic and seasonal influenza in Norway using a**  
8  
9  
10 **dynamic model**  
11  
12

13  
14 Christina Hansen Edwards<sup>1</sup>, Gianpaolo Scalia Tomba<sup>2</sup>, Ivar Sønbo Kristiansen<sup>3</sup>,

15  
16  
17 Richard White<sup>4</sup>, Birgitte Freiesleben de Blasio<sup>4,5</sup>  
18  
19

20  
21 <sup>1</sup>Department of Health and Inequality, Norwegian Institute of Public Health, P.O. Box  
22  
23  
24  
25 0403. 4403 Nydalen, Oslo, Norway.  
26  
27

28  
29 <sup>2</sup>Department of Mathematics, University of Rome Tor Vergata, Via Ricerca Scientifica  
30  
31  
32 00133 Roma, Italy.  
33  
34

35  
36 <sup>3</sup>Department of Health Management and Health Economics, Institute for Health and  
37  
38  
39 Society, University of Oslo. P.O.Box 1130. 0318 Blindern, Oslo, Norway.  
40  
41

42  
43  
44 <sup>4</sup>Department of Infectious Disease Epidemiology and Modelling, Norwegian Institute  
45  
46  
47 of Public Health, P.O. Box 0403. 4403 Nydalen, Oslo, Norway.  
48  
49

1  
2  
3  
4 <sup>5</sup>Oslo Centre for Biostatistics and Epidemiology. Department of Biostatistics. Institute  
5  
6  
7  
8 of Basic Medical Sciences. University of Oslo. P.O.Box 1122. 0317 Blindern, Oslo,  
9  
10  
11 Norway.

12  
13  
14  
15  
16  
17  
18  
19 **Correspondence to:** CH Edwards Christina.Hansen.Edwards@fhi.no  
20  
21  
22  
23  
24  
25  
26  
27

28 **Keywords:** Human Influenza; Infection Control; Epidemiology; Public Health; Health  
29  
30

31 Economics  
32  
33  
34  
35  
36  
37  
38  
39  
40  
41  
42  
43  
44  
45  
46  
47  
48  
49  
50  
51  
52  
53  
54  
55  
56  
57  
58  
59  
60

**Word count:** 4234

## Abstract

**Objectives:** To quantify population level health and economic consequences of sick leave among workers with influenza symptoms.

**Interventions:** Compared with current sick leave practice (baseline) we evaluated the health and cost consequences of: I) Increasing the proportion of workers on sick leave from 65% (baseline) to 80% or 90%; II) shortening the maximum duration from symptom onset to sick leave from 4 days (baseline) to 2 days, 1.5 days, 1 day, and 0.5 days; and III) combinations of I and II.

**Methods:** A dynamic compartmental influenza model was developed using Norwegian population data and survey data on employee sick leave practices. The sick leave interventions were simulated under 12 different seasonal epidemic and 36 different pandemic influenza scenarios. These scenarios varied in terms of transmissibility, the proportion of symptomatic cases, and illness severity (risk of primary care consultations, hospitalizations and deaths). Using probabilistic sensitivity analyses, a net health benefit approach was adopted to assess the cost-effectiveness of the interventions from a societal perspective.

**Results:** Compared with current sick leave practice, sick leave interventions were cost-effective for 31 (65%) of the pandemic scenarios, and 11 (92%) of the seasonal scenarios. Economic benefits from sick leave interventions were greatest for scenarios with low transmissibility, high symptomatic proportions, and high illness severity. Overall, the health and economic benefits were greatest for the intervention involving 90% of sick workers taking sick leave within one-half day of symptoms. Depending on the influenza scenario, this intervention resulted in a 44.4–99.7% reduction in the attack rate. Interventions involving sick

1  
2  
3  
4 leave onset beginning 2 days or later, after the onset of symptoms, resulted in economic  
5  
6 losses.

7  
8  
9 **Conclusions:** Prompt sick leave onset and a high proportion of sick leave among workers  
10  
11 with influenza symptoms may be cost-effective, particularly during influenza epidemics and  
12  
13 pandemics with low transmissibility or high morbidity.  
14  
15

## 16 17 18 **Article Summary**

### 19 20 21 **Strengths and limitations of this study**

- 22  
23 - Although national recommendations for flu management often advise sick leave from  
24  
25 work, no systematic studies of health and cost consequences of such recommendations  
26  
27 have been published, and no studies have evaluated the effects of sick leave  
28  
29 interventions in detail.  
30  
31
- 32  
33 - This study uses mathematical modelling to compare current sick leave practice with  
34  
35 14 alternative sick leave interventions, related to the proportion of ill employees taking  
36  
37 sick leave and the timeliness of sick leave relative to symptoms, to investigate the  
38  
39 epidemiological effects of these interventions and their economic consequences  
40  
41
- 42  
43 - Some of the parameters used in the modelling and evaluation are not influenza-  
44  
45 specific, such as the above current sick leave practice, but rather based on influenza-  
46  
47 like illness (ILI), being derived from interviews unaccompanied by test results.  
48  
49
- 50  
51 - All interventions were assessed for a variety of potential epidemic and pandemic  
52  
53 influenza scenarios with varying characteristics.  
54  
55
- 56  
57 - We have studied the population-wide effects for the Norwegian setting and our  
58  
59 findings may not be directly transferrable to other settings or sub-groups.  
60

## Introduction

Seasonal influenza affects 5–15% of the world's population annually. Globally, influenza epidemics are responsible for 250,000–500,000 deaths and 3–5 million cases of severe illness per year.<sup>1</sup> During an influenza pandemic the disease burden may increase substantially. The disease also imposes a considerable cost burden on the healthcare system, but the greatest proportion of costs are indirect costs resulting from lost workdays.<sup>2</sup>

When influenza-infected workers report to work, their co-workers are at risk of becoming infected. We recently conducted a literature review on influenza transmission in the workplace and assessed sick leave recommendations during influenza in 18 European countries.<sup>3</sup> We found that while pandemic preparedness plans of many European countries officially advise sick workers to be absent from work, only one study was identified that had assessed the effectiveness of sick leave interventions during influenza.<sup>3</sup> This was a modelling study from the US that indicated that liberal sick leave policies and increased payment compensations during sick leave would reduce workplace transmission up to 39%<sup>3 4</sup>. Norway is a western-European society with generous social welfare programs, so few workers lose income as a result of sick leave due to influenza-like symptoms.<sup>5-7</sup> No studies to date have ascertained whether sick leave during influenza is a cost-effective way of reducing the spread of influenza. In addition, countries that advise workers with influenza to take sick leave recommend diverse sick leave strategies.<sup>3</sup>

Influenza transmission depends on a complex interaction between the host, pathogen and the environment. Characteristics, such as the attack rate and disease severity of a particular influenza season, may affect which sick leave strategies are most cost-effective to implement. The effectiveness of sick leave as a mitigation intervention is limited by

1  
2  
3  
4 asymptomatic transmission. The proportion of asymptomatic cases reported in the literature  
5  
6 varies between 25% and 75%,<sup>8-11</sup> and asymptomatic cases may shed reduced amounts of the  
7  
8 virus.<sup>12</sup> Moreover, in symptomatic individuals, virus shedding may begin 1–2 days prior to  
9  
10 the onset of symptoms.<sup>9 10</sup> During the symptomatic phase, workers can either choose to be  
11  
12 present at work while feeling ill (“presenteeism”) or to remain at home (“absenteeism”).  
13  
14  
15 Studies have suggested that workplace presenteeism during influenza infection is  
16  
17 widespread.<sup>13 14</sup> From a public health and socioeconomic perspective, incentivising sick leave  
18  
19 during influenza infection may reduce disease transmission enough to reduce the overall costs  
20  
21 to society<sup>15</sup>. From the perspective of an employer, however, the burden of work absenteeism  
22  
23 may be considerable, as the value of the work employees would have produced is lost.<sup>16 17</sup>  
24  
25  
26

27  
28 Using a model framework, we attempted to quantify the costs and health consequences  
29  
30 of increasing sick leave among workers with influenza symptoms. In our study we define sick  
31  
32 leave as the period of time a worker is absent from paid work due to influenza symptoms. We  
33  
34 simulated the effect of implementing different sick leave policies during an influenza  
35  
36 outbreak in the Norwegian population. We conducted a survey to inform the model with local  
37  
38 data on current influenza-related sick leave behaviour in Norway, and compared different sick  
39  
40 leave interventions with current practice.  
41  
42  
43  
44  
45  
46  
47  
48  
49  
50  
51  
52  
53  
54  
55  
56  
57  
58  
59  
60



## Material and methods

### Modelling assumptions

We developed a model to quantify the number of mild, moderate and severe influenza cases. A scenario-based approach was applied to account for the fact that influenza, particularly pandemic influenza, varies in terms of transmissibility, likelihood of symptomatic infections, and illness severity (i.e. risk of primary care visits, hospitalizations and death). We differentiated between interventions (variation in sick leave behaviour) and scenarios (variations in influenza characteristics), and studied each sick leave intervention given each distinct influenza scenario. In total, we analysed current sick leave practice (baseline), and 14 alternative sick leave interventions combined with 48 influenza scenarios. The health outcomes from the disease model were used in an economic model to estimate costs and quality adjusted life years (QALYs). Because the parameters of the economic model were uncertain, we used Monte Carlo simulations to explore the consequences of the uncertainty. In this paper, we outline the main characteristics of the models and their input parameters. A detailed description of the survey and models is provided in Supplementary file 1.

### Influenza-related sick leave

During epidemics, Norwegian health authorities advise that workers with symptoms of influenza remain at home until feeling well enough to work. During pandemics, sick leave is recommended until at least 24 hours following defervescence<sup>3 18</sup>. Lacking data on influenza-related absences, we conducted a web-based survey in a convenience sample of 490 Norwegian employees. In total, 46% (224/490) of the participants reported having experienced influenza-like symptoms during the previous influenza season. Based on expert opinion, influenza-like symptoms, for the purposes of the survey, included: fever, cough, sore

1  
2  
3  
4 throat, headache, fatigue, muscle pain, and/or stuffy nose. Among participants reporting  
5  
6 influenza-like-symptoms, 74% took sick leave. The duration of absence varied from 1–13  
7  
8 workdays (mean of 2.4 days), and individuals waited from 1–8 days (mean of 2.7 days) after  
9  
10 the onset of symptoms to take leave. Among those who took sick leave, 24% began on the  
11  
12 first day that they experienced symptoms, 43% on the second day, 19% on the third day,  
13  
14 while 14% waited at least four days before taking sick leave.  
15  
16  
17

18 The survey respondents were mostly public sector employees who have high job  
19  
20 security. There is evidence that workers with lower job security are more likely to attend work  
21  
22 despite feeling ill,<sup>19</sup> therefore we lowered the baseline sick leave rate in our model to 65% to  
23  
24 make the results more representative of the general working population in Norway.  
25  
26  
27

28 In the baseline sick leave setting, we assumed that symptomatic workers would stay at  
29  
30 home for an average of 3.5 calendar days for seasonal influenza, adjusting for a working week  
31  
32 of five days. For pandemic influenza, we increased this period to 6.5 calendar days, in line  
33  
34 with the Norwegian national guidelines during the 2009 H1N1 pandemic that suggested one  
35  
36 week of absence from the onset of symptoms. Consistent with the survey, we assumed that  
37  
38 among those workers who take sick leave because of influenza, 24%, 43%, 19%, and 14%  
39  
40 would initiate sick leave on the first, second, third, and fourth day relative to symptom onset,  
41  
42 respectively. We found no data in the literature on the proportion of children absent from  
43  
44 school or day-care due to influenza-like illness. Therefore, we assumed that 90% of children  
45  
46 with influenza would remain at home, with cumulative withdrawal rates of 33%, 67%, and  
47  
48 100% on the first, second, and third day relative to symptom onset, respectively.  
49  
50  
51  
52  
53  
54  
55  
56  
57  
58  
59  
60

## Interventions

We considered all combinations of the following interventions aimed at increasing the proportion of workers taking sick leave and/or reducing the delay from symptom onset to withdrawal from the workplace: I) proportion of symptomatic workers taking sick leave: 65%, 80% and 90%, and II) maximum time from symptom onset to sick leave: 0.5 days, 1 day, 1.5 days, 2 days and 4 days. These interventions were chosen based on the results from our survey on sick-leave behaviour, and on perceived feasibility. Interventions were compared to the baseline sick leave practice, defined as 65% of ill workers taking sick leave after a maximum of four days with symptoms. In children, the baseline pattern of sick leave was kept constant.

We simulated interventions with less than 4 days of maximum delay from symptoms onset to sick leave using a truncated variant of the baseline daily withdrawal proportions. For example, in the case of a maximum of 2 days delay, 24% would initiate sick leave when symptoms first appeared, 43% on the following day, and the remaining 33% on the next day.

## Main features of the influenza model and the economic model

We developed an age-structured, deterministic simulation model (Fig 1) for the spread of influenza in Norway (population: 5.05 million in January 2013). The social mixing structure, representing mixing within households, schools, workplaces, and general society, was reconstructed from simulations based on real demographic data. People at home with influenza illness were assumed to not mix with other people at work/school, or in the general population. We calibrated the model to a broad spectrum of seasonal and pandemic influenza scenarios: seasonal epidemics at an effective reproductive number ( $R_{\text{eff}}$ ) of 1.2, 1.3, and 1.4, assuming 35% of children and 25% of adults would develop symptoms (low symptomatic proportions), or that 65% of children and 55% of adults would develop symptoms (high

1  
2  
3  
4 symptomatic proportions). For pandemic influenza, we constructed scenarios at a basic  
5  
6 reproductive number ( $R_0$ ) of 1.4, 1.6, and 1.8, also assuming low or high symptomatic  
7  
8 proportions as described above. The reproductive number is defined as the number of  
9  
10 secondary cases that one influenza case would produce, and can be regarded as a measure of  
11  
12 transmissibility.  
13  
14

15  
16 We assumed that individuals become infectious prior to the onset of symptoms, and  
17  
18 that their infectivity would peak approximately on the first day of symptoms and would last  
19  
20 for seven days, according to a given infectivity profile (Figure SMM2, Supplementary File 1).  
21  
22 Individuals with asymptomatic infection were assumed to be half as infectious as those with  
23  
24 symptoms, but with a similar contour of infectivity.  
25  
26  
27

28  
29 We developed a probabilistic health economic model to translate the output from the  
30  
31 infection model into costs of healthcare, costs of sick leave (productivity losses), and the  
32  
33 intervention costs for each intervention. Productivity losses are highly relevant in sick leave  
34  
35 intervention studies, and therefore we assessed cost-effectiveness from a societal perspective.  
36  
37 To ease comparison between the interventions and scenarios, we used a net health benefit  
38  
39 (NHB) approach assuming that the value of a QALY ( $\lambda$ ) is NOK 570,807 (\$98,060 USD<sup>20</sup>) in  
40  
41 line with Norwegian guidelines.<sup>21</sup> By definition,  $NHB = QALY \text{ gains} - (\text{cost of intervention} /$   
42  
43  $\lambda)$ . This means that an intervention is cost-effective if NHB expressed as QALYs is greater  
44  
45 than zero. All costs were measured in 2012 Norwegian Kroner (NOK) (\$1.00 USD = NOK  
46  
47 5.82)<sup>20</sup>.  
48  
49  
50

51  
52 The age-specific incidence of symptomatic influenza from simulations of the dynamic  
53  
54 model was used as input data for the economic analyses. We used the estimates adopted in the  
55  
56 2014 Norwegian pandemic preparedness plan for the proportion of clinical cases that would  
57  
58  
59  
60

1  
2  
3  
4 require healthcare (visit to a GP, hospitalisation, or intensive care treatment), and used  
5  
6 estimates of mortality from the same source.<sup>22</sup> The plan includes three distinct  
7  
8 morbidity/mortality estimates for moderate, severe, and very severe pandemics. The  
9  
10 morbidity during seasonal influenza was assumed to be similar to that observed during a  
11  
12 moderate pandemic.  
13  
14  
15

16 The dynamic influenza model was developed in Matlab version R2013a using the  
17  
18 ode45 solver. The economic model was developed in STATA-13 and Excel 2010.  
19  
20  
21  
22  
23  
24  
25  
26  
27  
28  
29  
30  
31  
32  
33  
34  
35  
36  
37  
38  
39  
40  
41  
42  
43  
44  
45  
46  
47  
48  
49  
50  
51  
52  
53  
54  
55  
56  
57  
58  
59  
60

## Results

This section is organised as follows: First, we present the baseline disease burden and baseline economic costs for each of the main scenarios. Second, we describe the health impacts of the sick leave interventions. Third, we present the results of the cost-effectiveness analyses. Lastly, we present results from the sensitivity analyses, in which we have assumed extra mixing in the household and general population in individuals who are absent from work. We present the epidemiological results by reporting relative changes in the clinical attack rate (AR), which is defined as the proportion of the population that acquire a clinical infection. The comparative changes in GP visits, hospitalisations, and mortalities closely mimicked changes in the AR. We report the cost-effectiveness results in terms of mean NHB. Complete tables for all results related to the epidemiologic outcomes, direct and indirect costs in the economic model, including probabilistic variation, are presented in Supplementary file 2.

### Baseline scenarios

Table 1 shows the key epidemiologic and economic results for each of the baseline scenarios for seasonal and pandemic influenza. In the absence of any intervention, the model produced clinical attack rates (ARs) ranging from 3.2–16.9% for seasonal influenza at an  $R_{\text{eff}}$  of 1.2–1.4, and 9.4–34.8% for pandemic influenza at an  $R_0$  of 1.4–1.8. Visits to a GP and hospitalisations ranged from 478–2,521 and 23–122 per 100,000 people for seasonal epidemics, and from 1,398–8,688 and 67–1,207 per 100,000 for pandemics. The corresponding mortality ranged from 5–26 expected deaths per 100,000 people for seasonal influenza, and from 15–243 deaths for pandemic influenza.

**Table 1: Key population baseline epidemiological and economic outcomes for seasonal epidemics and severe pandemics in each of the scenarios considered.**

| Baseline outcomes in the total population                  | Seasonal influenza<br>$R_{eff}^b$ |       |       | Pandemic influenza severe (moderate; very severe) <sup>a</sup><br>$R_0^c$ |                      |                      |
|------------------------------------------------------------|-----------------------------------|-------|-------|---------------------------------------------------------------------------|----------------------|----------------------|
|                                                            | 1.2                               | 1.3   | 1.4   | 1.4                                                                       | 1.6                  | 1.8                  |
| <b>Low symptomatic proportions</b>                         |                                   |       |       |                                                                           |                      |                      |
| Clinical attack rate, AR (%)                               | 3.2                               | 5.3   | 7.0   | 9.4                                                                       | 13.0                 | 15.6                 |
| Median number of GP visits per 100,000 population          | 478                               | 789   | 1,053 | 1,866 (1,398; 2,334)                                                      | 2,587 (1,939; 3,236) | 3,115 (2,334; 3,896) |
| Median number of hospitalisations (per 100,000 population) | 23                                | 38    | 51    | 184 (67; 325)                                                             | 255 (93; 450)        | 307 (112; 541)       |
| Median number of deaths (per 100,000 population)           | 5                                 | 8     | 11    | 21 (15; 65)                                                               | 30 (20; 90)          | 35 (24; 109)         |
| Mean total costs (million USD)                             | 94                                | 155   | 205   | 473 (401; 569)                                                            | 656 (557; 789)       | 790 (670; 950)       |
| Productivity losses (% of total costs)                     | 83                                | 83    | 83    | 75 (88; 62)                                                               | 75 (88; 62)          | 75 (88; 62)          |
| <b>High symptomatic proportions</b>                        |                                   |       |       |                                                                           |                      |                      |
| Clinical attack rate, AR (%)                               | 9.0                               | 13.3  | 16.9  | 22.3                                                                      | 29.5                 | 34.8                 |
| Median number of GP visits per 100,000 population          | 1,342                             | 1,983 | 2,521 | 3,329 (4,442; 5,557)                                                      | 5,892 (4,415; 7,370) | 6,946 (5,205; 8,688) |
| Median number of hospitalisations (per 100,000 population) | 65                                | 96    | 122   | 438 (160; 772)                                                            | 581 (212; 1,024)     | 685 (251; 1,207)     |
| Median number of deaths (per 100,000 population)           | 14                                | 20    | 26    | 50 (34; 155)                                                              | 66 (44; 1,024)       | 78 (53; 243)         |
| Mean total costs (million USD)                             | 257                               | 378   | 479   | 1,134 (963; 1,363)                                                        | 1,503 (1,276; 1,807) | 1,770 (1,503; 2,128) |
| Productivity losses (% of total costs)                     | 82                                | 82    | 82    | 75 (88; 62)                                                               | 75 (88; 62)          | 75 (88; 62)          |

a= moderate (severe; very severe) refers to illness severity in the influenza scenario, b=effective reproductive number, c= basic reproductive number, cd= 35% of children aged < 16 years, and 25% of adults aged 16+ years develop symptoms, e=65% of children aged < 16 years, and 55% of adults aged 16+ years develop symptoms

1  
2  
3  
4 The mean total costs of influenza in Norway, including productivity losses and  
5  
6 healthcare resource use ranged from \$94–\$479 million USD for seasonal epidemics, \$401–  
7  
8 1,503 million for moderate pandemics, \$473–1,770 million for severe pandemics, and \$569–  
9  
10 2,128 million for very severe pandemics. Production losses made up the majority of the total  
11  
12 costs. The proportion of the total costs owing to productivity losses was 82–83% during  
13  
14 seasonal influenza, and 62–82% during pandemic influenza. The proportion was lowest  
15  
16 during very severe pandemic influenza, where the healthcare costs increased substantially.  
17  
18 (Fig S1).  
19  
20  
21  
22

### 23 **Epidemiological impact of sick leave interventions in workplaces**

24  
25 Figures 2 and 3 display the intervention effects on the AR, the epidemic peak delay,  
26  
27 and changes in the epidemic curves when compared to the baseline scenarios.  
28  
29

30 For the seasonal influenza scenarios, the AR was reduced by 44.4–98.8% (mean value  
31  
32 of 85.4%) compared with the baseline values (Fig 2A). The interventions achieved the highest  
33  
34 reduction at the lowest transmissibility of  $R_{\text{eff}} = 1.2$  (blue) and at high symptomatic  
35  
36 proportions (solid lines); the relative minimum AR was 60.3% assuming low symptomatic  
37  
38 proportions (stippled lines). As expected, the interventions with a high proportion of workers  
39  
40 on sick leave (90%) and early withdrawal from work/school (0.5 days) had the greatest effect.  
41  
42 General trends in the pandemic scenarios were similar to those obtained in the seasonal  
43  
44 epidemics. However, as the transmissibility in these scenarios was higher on average, the  
45  
46 interventions were less effective. Overall, the interventions reduced the AR by 63.6–99.7%  
47  
48 (mean AR of 91.0%) relative to their baseline values (Fig 2B). Pandemic scenarios with low  
49  
50 symptomatic proportions had a relative minimum AR of 77.3%.  
51  
52  
53  
54  
55  
56  
57  
58  
59  
60



1  
2  
3  
4 In the seasonal influenza scenarios, the interventions delayed the epidemic peak by 0  
5  
6 to 58 days. The delay was particularly pronounced at  $R_{\text{eff}} = 1.2$  (Fig 2C and Fig 3, left  
7  
8 column top panel). The scenarios assuming low symptomatic proportions had a maximum  
9  
10 time delay of 43 days, and most cases, exhibiting a delay of 1–2 weeks. Pandemic scenarios  
11  
12 resulted in shorter peak time delays than the seasonal scenarios, ranging from 0–20 days (Fig  
13  
14 2D and Fig 3, right column); the delay of time to peak was at most 10 days in scenarios with  
15  
16 low symptomatic proportions.  
17  
18

19  
20 The median age among avoided clinical cases was similar within each scenario,  
21  
22 ranging from 26.7–33.6 years for the seasonal scenarios, and from 33.6–38.1 years for the  
23  
24 pandemic scenarios (Fig S2 and Fig S3). More infections were avoided in younger individuals  
25  
26 when transmissibility or symptomatic proportions were low.  
27  
28

### 29 30 **Cost-effectiveness of sick leave interventions in workplaces**

31  
32 Figure 4 summarises the results of the cost-effectiveness analyses for seasonal  
33  
34 influenza (Fig 4A), and for pandemics assuming moderate, severe, and very severe illness  
35  
36 (Fig 4B–D, respectively).  
37  
38

39  
40 In total, for 100% (6/6) of seasonal influenza scenarios, sick leave interventions were  
41  
42 cost-effective compared to current sick leave practice; cost-effective interventions were  
43  
44 obtained for 50% (3/6) of moderate, 50% (3/6) of severe, and 87% (5/6) of very severe  
45  
46 pandemic scenarios. In general, the mean NHB was higher at low transmissibility (blue)  
47  
48 compared to high transmissibility (red) assuming that all other factors remained equal (Fig 4).  
49  
50 The mean NHB was larger at high symptomatic proportions (squares) compared to low  
51  
52 symptomatic proportions (crosses), for similar transmissibility.  
53  
54  
55  
56  
57  
58  
59  
60

1  
2  
3  
4 In the pandemic scenarios assuming low symptomatic proportions, interventions were  
5  
6 cost-effective for  $R_0 < 1.6$ , except in the case of a very severe pandemic where interventions  
7  
8 were also cost-effective for  $R_0 = 1.6$  (Fig 4B-D). For pandemic influenza with high  
9  
10 symptomatic proportions, all scenarios at  $R_0 < 1.8$  produced cost-effective interventions. For  
11  
12 very severe pandemic scenarios, cost-effective interventions were also found for  $R_0 = 1.8$ .  
13  
14  
15

16 In 16 of the 17 scenarios for which interventions were cost-effective, the superior  
17  
18 intervention was for 90% of ill workers to take sick leave within one-half day of the onset of  
19  
20 symptoms. (Fig 4 and Fig S1). While in one scenario, a seasonal epidemic at  $R_{eff} = 1.4$  with  
21  
22 low symptomatic proportions, 90% of symptomatic workers taking sick leave was the most  
23  
24 cost-effective intervention. In this particular case, the combination of 90% of symptomatic  
25  
26 workers taking sick leave and sick leave onset within 0.5 days ranked third in terms of cost  
27  
28 effectiveness. Generally, when symptomatic proportions were low, the only cost-effective  
29  
30 interventions were those in which sick leave onset occurred within 0.5 days, or interventions  
31  
32 solely increasing the adherence. In contrast, scenarios with high symptomatic proportions  
33  
34 produced cost saving results for a variety of different interventions.  
35  
36  
37  
38

39 Among the cost-effective interventions, the largest mean NHB was in the range 31–  
40  
41 535 quality adjusted life years (QALYs) for low symptomatic proportions and 1,506–2,898  
42  
43 QALYs for high symptomatic proportions in the seasonal scenarios. For pandemic scenarios  
44  
45 with low symptomatic proportions, interventions were cost-effective for moderate and severe  
46  
47 scenarios with low transmissibility ( $R_0=1.4$ ), and for very severe scenarios with low and  
48  
49 moderate transmissibility ( $R_0=1.4$  and  $R_0=1.6$ ). The largest mean NHBs were 292, 477,  
50  
51 and 170–1,185 QALYs for assumptions of moderate, severe, and very severe  
52  
53 morbidity/mortality, respectively. For high symptomatic proportions, the QALY value varied  
54  
55  
56  
57  
58  
59  
60

1  
2  
3  
4 from 345–3,749, 1,966–4,481, and 1,859–7,256 for moderate, severe, and very severe  
5 morbidity/mortality, respectively.  
6  
7

8  
9 Notably, interventions that focused exclusively on increasing the proportion of  
10 workers taking sick leave during influenza, had comparatively high probabilities of being  
11 cost-effective, as shown by the stochastic simulations and illustrated in acceptability curves  
12 (Fig S4). Conversely, interventions with sick leave starting later than one day after the onset  
13 of symptoms were generally not cost-effective, except for scenarios with high symptomatic  
14 proportions, or when combined with an increased proportion of symptomatic workers taking  
15 sick leave.  
16  
17  
18  
19  
20  
21  
22  
23  
24

#### 25 26 **Sensitivity analyses: assuming extra mixing for individuals absent from work** 27

28 In the sensitivity analyses where additional mixing in the household and the general  
29 population was assumed, the effectiveness of sick leave interventions was somewhat  
30 diminished compared with the main scenarios (Fig S5). However, on the whole, the cost-  
31 effectiveness and ranking of the different interventions under the various scenarios were  
32 retained (Fig S6 and Fig S7). The reduction in the AR relative to the baseline varied from  
33 52.7–99.4% in the seasonal scenarios, and 69.1–99.7% in the pandemic scenarios (Fig S5). In  
34 total, 83% (5/6) of seasonal scenarios, and 33% (2/6) of moderate, 50% (3/6) of severe, and  
35 67% (4/6) of very severe pandemic scenarios produced cost-saving interventions. Consistent  
36 with the results obtained in the main analyses, the best intervention for the scenarios with  
37 cost-effective results was 90% of symptomatic workers taking sick leave with withdrawal at  
38 0.5 days after the onset of symptoms. For this intervention, the mean NHB varied from 101–  
39 2,192 QALYs for seasonal epidemics, and from 168–2,414, 131–3,019, and 388–5,314  
40 QALYs for moderate, severe, and very severe pandemics, respectively.  
41  
42  
43  
44  
45  
46  
47  
48  
49  
50  
51  
52  
53  
54  
55  
56  
57  
58  
59  
60

## Discussion

We have shown that the effectiveness of sick leave during influenza on reducing the spread of the disease is dependent on: i) timing of absence onset, ii) the proportion of ill workers leaving work and iii) the characteristics of the influenza epidemic (transmissibility, influenza severity, etc.). The results of our study indicate that the earlier the absence and the greater the proportion leaving work, the greater the effectiveness. Leaving work more than two days after onset of symptoms has minimal impact on the spread of the disease. Even when taking costs of lost production into account, early absence among high proportions of workers is cost-effective in most disease scenarios. Exceptions are pandemics with low transmissibility and general epidemics with low symptomatic proportions.

The modelling approach allowed us to simulate population level effects of different sick leave interventions under a range of possible influenza scenarios, providing information that would not readily be observed in real-life studies. The scenarios presented are largely consistent with a recent review on pandemic influenza scenarios in Europe, in which the authors argued for the use of multiple scenarios based on the recent experience from the 2009 H1N1 pandemic<sup>23</sup>. Other studies address the effects of expanding the right to sick leave<sup>4 24</sup>, but since access to paid sick leave is more or less universal in Norway, we have focused specifically on different sick leave interventions. Our study is the first to investigate epidemiological and economic outcomes of workplace-based interventions on a population level. We are also the first, to our knowledge, to investigate the effects of the timeliness of sick leave initiation relative to symptom onset during influenza.

Our results indicate that early withdrawal is important for cost-effectiveness, but this result may depend on the ability to differentiate influenza from other illnesses with similar

1  
2  
3  
4 symptoms. Because influenza symptoms are non-specific, and it is unknown whether sick  
5  
6 leave interventions are cost-effective for illnesses with influenza-like symptoms, e.g.  
7  
8 respiratory syncytial virus (RSV), early withdrawal may not be as cost-effective in practice.  
9  
10 Influenza surveillance data, which is available in many countries, could be used to restrict  
11  
12 recommendations to apply only in geographic regions where influenza activity is rising.  
13  
14 Another central question is how these sick leave recommendations can be communicated  
15  
16 effectively to the working population and the costs of achieving the sick leave behaviours  
17  
18 described. In our study, the cost-effective interventions were also assumed to be the most  
19  
20 costly to implement, with a mean cost of \$5.6 million; but the true cost is uncertain. A pilot  
21  
22 study could be initiated to assess costs and feasibility of earlier sick leave and increased  
23  
24 proportion of symptomatic workers taking sick leave.  
25  
26  
27  
28  
29

30 Our study has several limitations. The profile of infectiousness assumed in our model  
31  
32 was an influential variable. Although it was based on data from a household study, we  
33  
34 acknowledge that there is uncertainty related to how infectiousness changes over time, and to  
35  
36 the relative infectivity of an asymptomatic infection. The proportion of GP visits and hospital  
37  
38 admissions, and the case-fatality rate assumed under different influenza scenarios were based  
39  
40 on estimates proposed by Norwegian experts, and were not age-specific. A recent review  
41  
42 reported lower estimates in other European countries,<sup>23</sup> but these values are likely country-  
43  
44 specific. Another limitation of this study was that influenza illness has been shown to reduce  
45  
46 productivity at work,<sup>25</sup> however, this may vary depending on occupation. We assumed that  
47  
48 8% of workers would continue to work from home during their illness and while taking care  
49  
50 of sick children, but information on this topic is scarce. A study from Sweden found that 60%  
51  
52 of parents work from home when their children are sick<sup>26</sup> thus our assumption may  
53  
54 underestimate the economic benefit of the intervention. The economic benefits from earlier  
55  
56  
57  
58  
59  
60

1  
2  
3  
4 onset of sick leave may also have been underestimated. It seems plausible that earlier sick  
5  
6 leave onset could lead to a quicker recovery, however, we could not find any evidence of this  
7  
8 in the literature; therefore, we assumed the recovery period to be constant, and independent of  
9  
10 sick leave onset. Finally, influenza cases and workplace absences were modelled to occur  
11  
12 randomly on a population level. In reality, absences may cluster in specific workplaces, which  
13  
14 may cause understaffing for critical functions and a subsequent increase in cost.  
15  
16  
17

18 We assumed that the number of days of sick leave was 3.5 calendar days for seasonal  
19  
20 influenza and 6.5 calendar days for pandemic influenza. Because we found that the  
21  
22 epidemiological benefits of sick leave were limited after 2 days of symptoms, we also  
23  
24 explored the effect of assuming the same number of total absence days during pandemics as  
25  
26 during epidemics (3.5 calendar days). This resulted in higher economic benefits for  
27  
28 interventions involving early onset within one day, but lower benefits for other interventions.  
29  
30  
31

32 Current recommendations on sick leave during influenza are typically focused on the  
33  
34 duration of sick leave, but the present results suggest that recommendations may be improved  
35  
36 by encouraging prompt initiation of sick leave. However, although sick leave can reduce the  
37  
38 spread of influenza, our findings indicate that this effect is insufficient to offset an ongoing  
39  
40 epidemic or pandemic so, ideally, sick leave interventions could be implemented as  
41  
42 supplements to other existing strategies. Economic evaluations of mitigation interventions  
43  
44 such as vaccines, antivirals, and school closures, are common in the literature.<sup>27-29</sup> In contrast,  
45  
46 studies on sick leave interventions are limited<sup>28,29</sup>, which is somewhat surprising considering  
47  
48 that this is a widespread recommendation in national pandemic preparedness plans.<sup>3</sup>  
49  
50  
51 Moreover, pharmaceutical interventions are limited by availability<sup>30</sup>; therefore non-  
52  
53 pharmaceutical interventions can be considered as viable backup strategies. As a result, there  
54  
55  
56  
57  
58  
59  
60

1  
2  
3  
4 is a need for quantitative modelling for policy planning and decision-making purposes. The  
5  
6 present economic results are based on Norwegian demographic and economic assumptions,  
7  
8 and several factors would need to be recalculated for use in other countries. Nevertheless, our  
9  
10 model provides a structure for analysing this problem and provides a method, which could be  
11  
12 employed by other researchers.  
13  
14

15  
16 The findings in this paper indicate that there are epidemiological and economic  
17  
18 benefits from sick leaves during influenza, however further studies are needed to assess these  
19  
20 effects in more detail and in other settings. Future studies should consider collecting  
21  
22 additional data on influenza transmission pathways, sick leave practice and the behaviour of  
23  
24 workers during sick leave. Ideally, such studies should also aim to test for influenza to  
25  
26 establish aetiology, rather than relying on self-reported influenza status. Moreover, it is of  
27  
28 importance to conduct studies to explore the effects of sick leave interventions within specific  
29  
30 occupational groups. For example, influenza has been found to be less prevalent in janitors  
31  
32 and technicians compared with other occupations.<sup>31</sup> Likewise, some workers may be more  
33  
34 likely to spread influenza (e.g. a waiter in a restaurant), or be more likely to spread influenza  
35  
36 to high-risk persons (e.g. healthcare workers). Finally, investigations into the cost-  
37  
38 effectiveness of sick leave interventions for other communicable diseases, perhaps especially  
39  
40 those with high illness severity or low transmissibility, are warranted.  
41  
42  
43  
44  
45  
46  
47

## 48 **Conclusion**

49  
50 Recommending early absence from work among all workers with influenza symptoms  
51  
52 represents an effective intervention during influenza epidemics and pandemics. The  
53  
54 intervention is also cost-effective in most influenza scenarios.  
55  
56  
57  
58  
59  
60

## List of abbreviations

AR: Attack rate

QALY: Quality adjusted life year

R<sub>0</sub>: Basic reproductive number

R<sub>eff</sub>: Effective reproductive number

NHB: Net health benefit

GP: General practitioner

EQ-5D: EuroQol 5 D

## Author contributions

The study was designed by BFdB, CHE, and ISK. The mathematical model was designed by BFdB and GST, and the economic model was developed by CHE, ISK, and RW. The data analysis was performed by CHE and BFdB. The manuscript was prepared by CHE and BFdB.

All authors revised and accepted the final manuscript.

## Acknowledgements

The authors wish to thank Siri Helene Hauge and Olav Hungnes of the Norwegian Institute of Public Health for their insightful comments and guidance on influenza and influenza-related policies. We would also like to thank Arna Desser for her assistance with proofreading the article.



## **Data sharing**

The main sources of data have been provided in the text of the main article or in the supplementary files, however, additional information can be provided by the authors on request.

## **Funding**

This research received no specific grant from any funding agency in the public, commercial, or not-for-profit sectors.

## **Competing interests**

All authors have completed the ICMJE uniform disclosure form and declare: no support from any organisation for the submitted work; no financial relationships with any organisations that might have an interest in the submitted work in the previous three years; and no other relationships or activities that could appear to have influenced the submitted work.

## **Ethical considerations**

Informed consent was obtained from all survey participants of the survey. The study was reviewed by the Data Protection Official at the University of Oslo, and it was considered that approval from an ethical committee was not required due to the nature/content of the study.

## References

1. World Health Organization. Influenza (seasonal) factsheet No211: World Health Organization; 2009 [08.10.2013]. Available from:  
<http://www.who.int/mediacentre/factsheets/fs211/en/>.
2. Xue Y, Kristiansen I, de Blasio B. Modeling the cost of influenza: the impact of missing costs of unreported complications and sick leave. *BMC public health* 2010;**10**(1):724. doi: 10.1186/1471-2458-10-724.
3. Edwards CH, Tomba GS, Blasio BFd. Influenza in workplaces: transmission, workers' adherence to sick leave advice and European sick leave recommendations *European Journal of Public Health* 2016;**1-8**. doi: 10.1093/eurpub/ckw031.
4. Kumar S, Grefenstette JJ, Galloway D, et al. Policies to reduce influenza in the workplace: impact assessments using an agent-based model. *American Journal of Public Health* 2013;**103**(8):1406-11. doi: 10.2105/AJPH.2013.301269.
5. National Insurance Act. Act 1997-02-28-19. Act relating to national insurance Avd I 1997 Nr. 5LOV-1997-02-28-19 [04.07.2014]. Available from:  
<https://lovdata.no/dokument/NL/lov/1997-02-28-19>.
6. Intensjonsavtale om et mer inkluderende arbeidsliv 4. mars 2014 - 31. desember 2018 (IA-avtalen) 2014 [04.07.2014]. Available from:  
[https://www.regjeringen.no/globalassets/upload/asd/dokumenter/2014/ia\\_20142018/signert\\_ia\\_avtale.pdf](https://www.regjeringen.no/globalassets/upload/asd/dokumenter/2014/ia_20142018/signert_ia_avtale.pdf).

- 1  
2  
3  
4 7. Ose SO, Dyrstad K, Slettebak R, et al. Evaluering av IA-avtalen (2010-2013) 2013  
5  
6 [03.07.2014]. Available from: [http://www.sintef.no/prosjekter/evaluering-av-ia-](http://www.sintef.no/prosjekter/evaluering-av-ia-avtalen-2010-2013/)  
7  
8 avtalen-2010-2013/.
- 9  
10  
11 8. Elder AG, O'Donnell B, McCrudden EA, et al. Incidence and recall of influenza in a cohort  
12  
13 of Glasgow healthcare workers during the 1993–4 epidemic: results of serum testing  
14  
15 and questionnaire. *Bmj* 1996;**313**(7067):1241-42.
- 16  
17  
18  
19 9. Carrat F, Vergu E, Ferguson NM, et al. Time lines of infection and disease in human  
20  
21 influenza: a review of volunteer challenge studies. *American journal of epidemiology*  
22  
23 2008;**167**(7):775-85. doi: 10.1093/aje/kwm375.
- 24  
25  
26  
27 10. Lau LLH, Cowling BJ, Fang VJ, et al. Viral shedding and clinical illness in naturally  
28  
29 acquired influenza virus infections. *Journal of Infectious Diseases*  
30  
31 2010;**201**(10):1509-16. doi: 10.1086/652241
- 32  
33  
34  
35 11. Suess T, Renschmidt C, Schink SB, et al. Comparison of shedding characteristics of  
36  
37 seasonal influenza virus (sub) types and influenza A (H1N1) pdm09; Germany,  
38  
39 2007–2011. *PloS one* 2012;**7**(12):e51653. doi: 10.1371/journal.pone.0051653.
- 40  
41  
42  
43 12. Patrozou E, Mermel LA. Does influenza transmission occur from asymptomatic infection  
44  
45 or prior to symptom onset? *Public health reports* 2009;**124**(2):193.
- 46  
47  
48  
49 13. Nichol KL, Heilly SJD, Greenberg ME, et al. Burden of Influenza-Like Illness and  
50  
51 Effectiveness of Influenza Vaccination among Working Adults Aged 50–64 Years.  
52  
53 *Clinical Infectious Diseases* 2009;**48**(3):292-98. doi: 10.1086/595842
- 54  
55  
56  
57  
58  
59  
60

- 1  
2  
3  
4 14. Carrat F, Sahler C, Rogez S, et al. Influenza burden of illness: estimates from a national  
5  
6 prospective survey of household contacts in France. *Archives of internal medicine*  
7  
8 2002;**162**(16):1842. doi: 10.1001/archinte.162.16.1842.  
9  
10  
11 15. Liao S, Ma Y, Chen J, et al. Paid sick-leave: is it a good way to control epidemics? In:  
12  
13 Glass K, Colbaugh R, Ormerod P, et al., eds. *Complex Sciences: Second*  
14  
15 *International Conference, COMPLEX 2012, Santa Fe, NM, USA, December 5-7,*  
16  
17 *2012, Revised Selected Papers.* Cham: Springer International Publishing, 2013:213-  
18  
19 27.  
20  
21  
22  
23 16. Keech M, Scott A, Ryan P. The impact of influenza and influenza-like illness on  
24  
25 productivity and healthcare resource utilization in a working population.  
26  
27 *Occupational Medicine* 1998;**48**(2):85-90. doi: 10.1093/occmed/48.2.85.  
28  
29  
30  
31 17. Keech M, Beardsworth P. The impact of influenza on working days lost.  
32  
33 *Pharmacoeconomics* 2008;**26**(11):911-24. doi: 10.2165/00019053-200826110-00004  
34  
35  
36  
37 18. Norwegian Institute of Public health. Reviderte råd for anbefalinger om sykefravær ved  
38  
39 influensaliknende sykdom [Revised advice for recommendations on absenteeism due  
40  
41 to influenza-like illness] [13.06.2013]. Available from:  
42  
43 [https://www.fhi.no/globalassets/migrering/dokumenter/pdf/rapport-om-anbefalinger-](https://www.fhi.no/globalassets/migrering/dokumenter/pdf/rapport-om-anbefalinger-om-fravar-ved-sykdom-2009-11-18.pdf.pdf)  
44  
45 [om-fravar-ved-sykdom-2009-11-18.pdf.pdf](https://www.fhi.no/globalassets/migrering/dokumenter/pdf/rapport-om-anbefalinger-om-fravar-ved-sykdom-2009-11-18.pdf.pdf).  
46  
47  
48  
49 19. Johns G. Presenteeism in the workplace: A review and research agenda. *Journal of*  
50  
51 *Organizational Behavior* 2010;**31**(4):519-42. doi: 10.1002/job.630.  
52  
53  
54 20. Central bank of Norway. Exchange rate for USD. 2013. [14.08.2015]. Available from:  
55  
56 <http://www.norges-bank.no/Statistikk/Valutakurser/>.  
57  
58  
59  
60

- 1  
2  
3  
4 21. Norwegian Directorate of Health. Helseeffekter i samfunnsøkonomiske analyser. 2007  
5  
6 [20.06.2014]. Available from:  
7  
8 [https://helsedirektoratet.no/lists/publikasjoner/attachments/643/helseeffekter-i-](https://helsedirektoratet.no/lists/publikasjoner/attachments/643/helseeffekter-i-samfunnsokonomiske-analyser-is-1435.pdf)  
9  
10 [samfunnsokonomiske-analyser-is-1435.pdf](https://helsedirektoratet.no/lists/publikasjoner/attachments/643/helseeffekter-i-samfunnsokonomiske-analyser-is-1435.pdf).  
11  
12  
13  
14 22. Ministry of Health and Care Services. Norwegian National Influenza Pandemic  
15  
16 Preparedness Plan 2006 [17.07.2014]. Available from:  
17  
18 [https://www.regjeringen.no/no/dokumenter/nasjonal-beredskapsplan-for-pandemisk-](https://www.regjeringen.no/no/dokumenter/nasjonal-beredskapsplan-for-pandemisk-in/id102132/)  
19  
20 [in/id102132/](https://www.regjeringen.no/no/dokumenter/nasjonal-beredskapsplan-for-pandemisk-in/id102132/).  
21  
22  
23  
24 23. Napoli C, Fabiani M, Rizzo C, et al. Assessment of human influenza pandemic scenarios  
25  
26 in Europe. *Euro Surveill*: 2015;**20**(7).  
27  
28  
29 24. Kumar S, Quinn SC, Kim KH, et al. The impact of workplace policies and other social  
30  
31 factors on self-reported influenza-like illness incidence during the 2009 H1N1  
32  
33 pandemic. *American Journal of Public Health* 2012;**102**(1). doi:  
34  
35 10.2105/AJPH.2011.300307.  
36  
37  
38  
39 25. Brouwer WB, Van Exel N, Koopmanschap M, et al. Productivity costs before and after  
40  
41 absence from work: as important as common? *Health Policy* 2002;**61**(2):173-87. doi:  
42  
43 10.1016/S0168-8510(01)00233-0.  
44  
45  
46  
47 26. Novus. Unionen – Privata tjänstemän om att vobba 2015: Unionen; 2015 [14.04.2015].  
48  
49 Available from: <http://www.unionenopinion.se>.  
50  
51  
52 27. Lee VJ, Lye DC, Wilder-Smith A. Combination strategies for pandemic influenza  
53  
54 response-a systematic review of mathematical modeling studies. *BMC medicine*  
55  
56 2009;**7**(1):76. doi: 10.1186/1741-7015-7-76.  
57  
58  
59  
60

- 1  
2  
3  
4 28. Aledort JE, Lurie N, Wasserman J, et al. Non-pharmaceutical public health interventions  
5  
6 for pandemic influenza: an evaluation of the evidence base. *BMC Public Health*  
7  
8 2007;**7**(1):208. doi: 10.1186/1471-2458-7-208.  
9  
10  
11 29. Crabtree A, Henry B. Non-pharmaceutical measures to prevent influenza transmission: the  
12  
13 evidence for individuals protective measures: National Collaborating Center for  
14  
15 Infectious Diseases, 2011.  
16  
17  
18  
19 30. Bell D, Nicoll A, Fukuda K, et al. Non-pharmaceutical interventions for pandemic  
20  
21 influenza, international measures. *Emerging infectious diseases* 2006;**12**(1):81-87.  
22  
23 doi: 10.3201/eid1201.051370.  
24  
25  
26  
27 31. Anderson NJ, Bonauto DK, Fan ZJ, et al. Distribution of influenza-like illness (ILI) by  
28  
29 occupation in Washington State, September 2009–August 2010. *PloS one*  
30  
31 2012;**7**(11):e48806. doi: 10.1371/journal.pone.0048806.  
32  
33  
34  
35  
36  
37  
38  
39  
40  
41  
42  
43  
44  
45  
46  
47  
48  
49  
50  
51  
52  
53  
54  
55  
56  
57  
58  
59  
60

1  
2  
3  
4  
5  
6  
7  
8  
9  
10  
11  
12  
13  
14  
15  
16  
17  
18  
19  
20  
21  
22  
23  
24  
25  
26  
27  
28  
29  
30  
31  
32  
33  
34  
35  
36  
37  
38  
39  
40  
41  
42  
43  
44  
45  
46  
47  
48  
49  
50  
51  
52  
53  
54  
55  
56  
57  
58  
59  
60

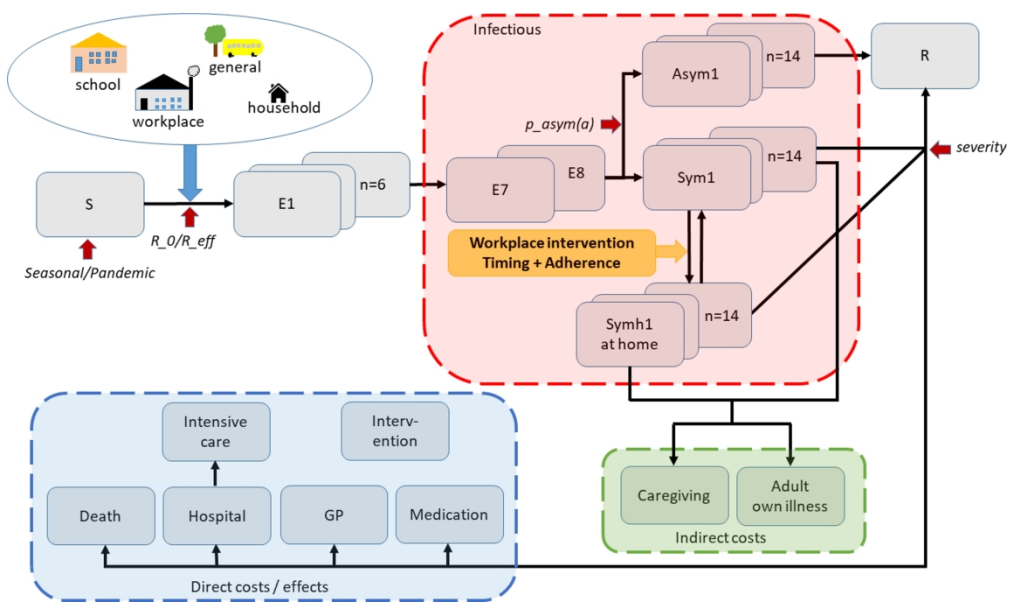

Fig 1

299x176mm (300 x 300 DPI)

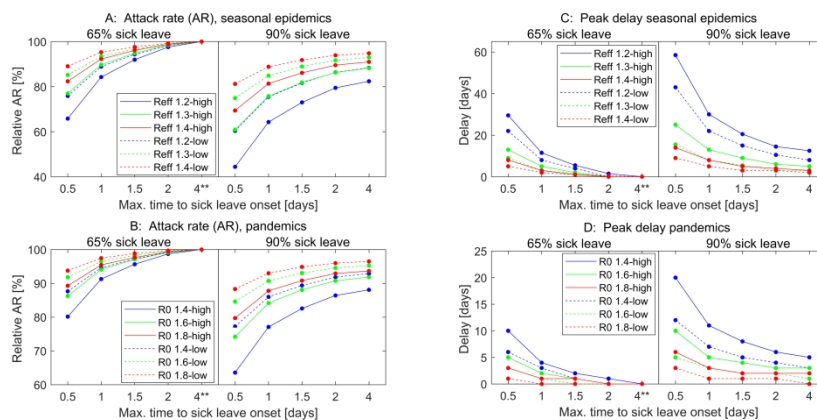

Fig 2

338x148mm (300 x 300 DPI)



1  
2  
3  
4  
5  
6  
7  
8  
9  
10  
11  
12  
13  
14  
15  
16  
17  
18  
19  
20  
21  
22  
23  
24  
25  
26  
27  
28  
29  
30  
31  
32  
33  
34  
35  
36  
37  
38  
39  
40  
41  
42  
43  
44  
45  
46  
47  
48  
49  
50  
51  
52  
53  
54  
55  
56  
57  
58  
59  
60

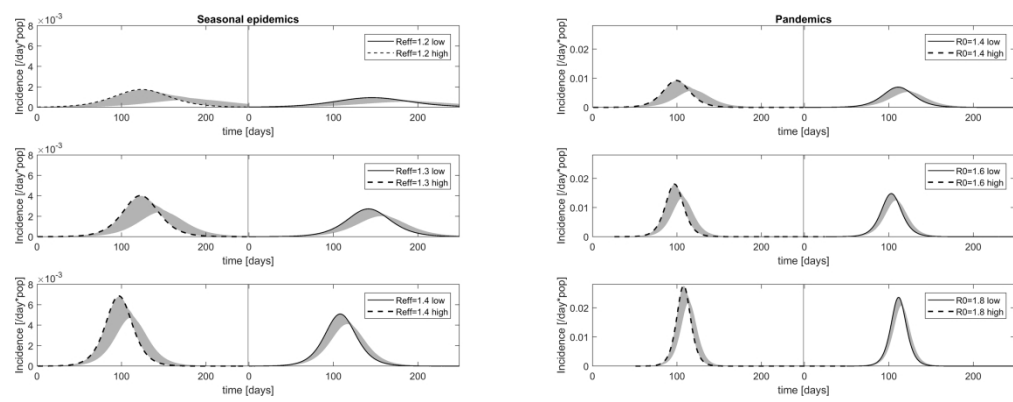

Fig 3

313x120mm (300 x 300 DPI)

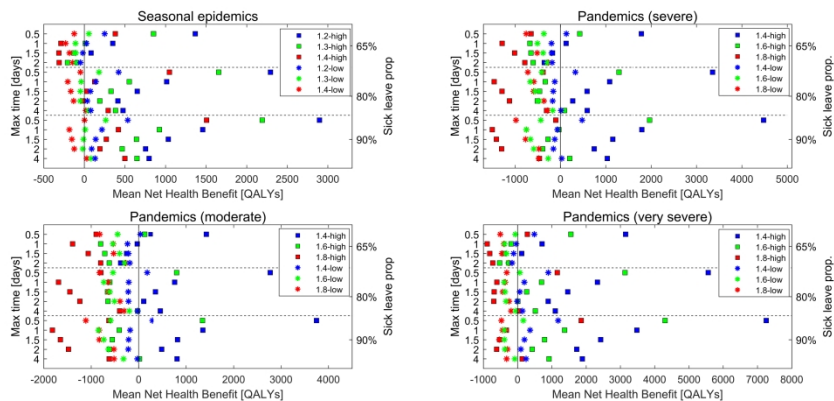

Fig 4

338x143mm (300 x 300 DPI)

1  
2  
3  
4  
5  
6  
7

## Evaluating costs and health consequences of sick leave strategies against pandemic and seasonal influenza in Norway using a dynamic model

8 Christina Hansen Edwards<sup>1</sup>, Gianpaolo Scalia Tomba<sup>2</sup>, Ivar Sønbo Kristiansen<sup>3</sup>, Richard  
9 White<sup>4</sup>, Birgitte Freiesleben de Blasio<sup>4,5</sup>

10  
11  
12  
13  
14  
15  
16  
17  
18  
19  
20  
21  
22  
23  
24  
25  
26  
27  
28  
29  
30  
31  
32  
33  
34  
35  
36  
37  
38  
39  
40  
41  
42  
43  
44  
45  
46  
47  
48  
49  
50  
51  
52  
53  
54  
55  
56  
57  
58  
59  
60

<sup>1</sup>Department of Health and Inequality, Norwegian Institute of Public Health, P.O. Box 0403. 4403  
Nydalén, Oslo, Norway.

<sup>2</sup>Department of Mathematics, University of Rome Tor Vergata, Via Ricerca Scientifica 00133 Roma,  
Italy.

<sup>3</sup>Department of Health Management and Health Economics, Institute for Health and Society,  
University of Oslo. P.O.Box 1130. 0318 Blindern, Oslo, Norway.

<sup>4</sup>Department of Infectious Disease Epidemiology and Modelling, Norwegian Institute of Public  
Health, P.O. Box 0403. 4403 Nydalén, Oslo, Norway.

<sup>5</sup>Oslo Centre for Biostatistics and Epidemiology. Department of Biostatistics. Institute of Basic  
Medical Sciences. University of Oslo. P.O.Box 1122. 0317 Blindern, Oslo, Norway.

Correspondence to: CH Edwards [Christina.hansen.edwards@fhi.no](mailto:Christina.hansen.edwards@fhi.no)

### SUPPLEMENTARY FILE 1: MATERIALS AND METHODS

## THE INFLUENZA MODEL

An age-stratified compartmental SEIR (*Susceptible-Exposed-Infected-Recovered*) model was developed to simulate the spread of influenza. Due to lack of local data, the social mixing patterns were adapted from published synthetic contact matrices, which were based on the simulation of an agent-based virtual population parameterized with detailed Norwegian census and social demographic data<sup>1</sup>. Mixing between age groups were defined using four setting-specific contact matrices, accounting for contacts within households ( $\mathbf{M}^H$ ), contacts within schools ( $\mathbf{M}^S$ ), contacts within workplaces ( $\mathbf{M}^W$ ) and contacts in the general population ( $\mathbf{M}^{GP}$ ). Each matrix provides the relative frequency of contacts between different age classes. The overall contact matrix ( $\mathbf{M}^{tot}$ ) was obtained as a linear combination

$$\mathbf{M}_{ij}^{TOT} = \sum_K \alpha_K \mathbf{M}_{ij}^K, \text{ where } \alpha_K \text{ accounts for the proportion of transmission occurring in the}$$

various settings,  $K \in \{H, S, W, GP\}$ . The weights,  $\alpha_K$ , were chosen at 0.3 for households, 0.18 for schools, 0.19 for workplaces and 0.33 for transmission occurring in the general community in accordance with empirical observations and previously published studies on influenza-like diseases<sup>1-5</sup>. Further details on the calculation of the mixing matrices are provided elsewhere<sup>1</sup>.

The population was divided into 100 one-year age groups according to the size and age-distribution of the Norwegian population at 1 January 2013<sup>6</sup>. Newly infected individuals pass through an incubation phase which was modelled using 8 compartments ( $E_1, E_2, \dots, E_8$ ). The average latency period was assumed at 1.5 days covering the first six compartments, and the mean incubation period was fixed at 1.9 days<sup>7</sup> including the  $E_1-E_8$  compartments. The mean duration of the infectious phase was assumed at 7.5 days, consisting of  $E_7-E_8$  compartments and 14 infectious compartments, all assumed to last for 0.5 days. The infectious

1  
2  
3 compartments were further split into three groups: people with asymptomatic infection  
4  
5 ( $Asym_1...Asym_{14}$ ), people with symptomatic infection ( $Sym_1...Sym_{14}$ ) and people with  
6  
7 symptomatic infection at home ( $Symh_1...Symh_2$ ). The timing and the rates of flow between the  
8  
9 two latter categories were modelled according to the type of intervention studied, as detailed  
10  
11 in the main text. The variation of infectivity as a function of the duration of time since  
12  
13 infection (the infectivity profile) was adapted from a study on household transmission<sup>5</sup>, which  
14  
15 is in alignment with data from the 2009 H1N1 pandemic where most transmission was found  
16  
17 to occur early after and to peak around the time of symptom onset<sup>7</sup> (Figure SMM2).  
18  
19  
20  
21  
22  
23  
24  
25  
26  
27  
28  
29  
30  
31  
32  
33  
34  
35  
36  
37  
38  
39  
40  
41  
42  
43  
44  
45  
46  
47  
48  
49  
50  
51  
52  
53  
54  
55  
56  
57  
58  
59  
60

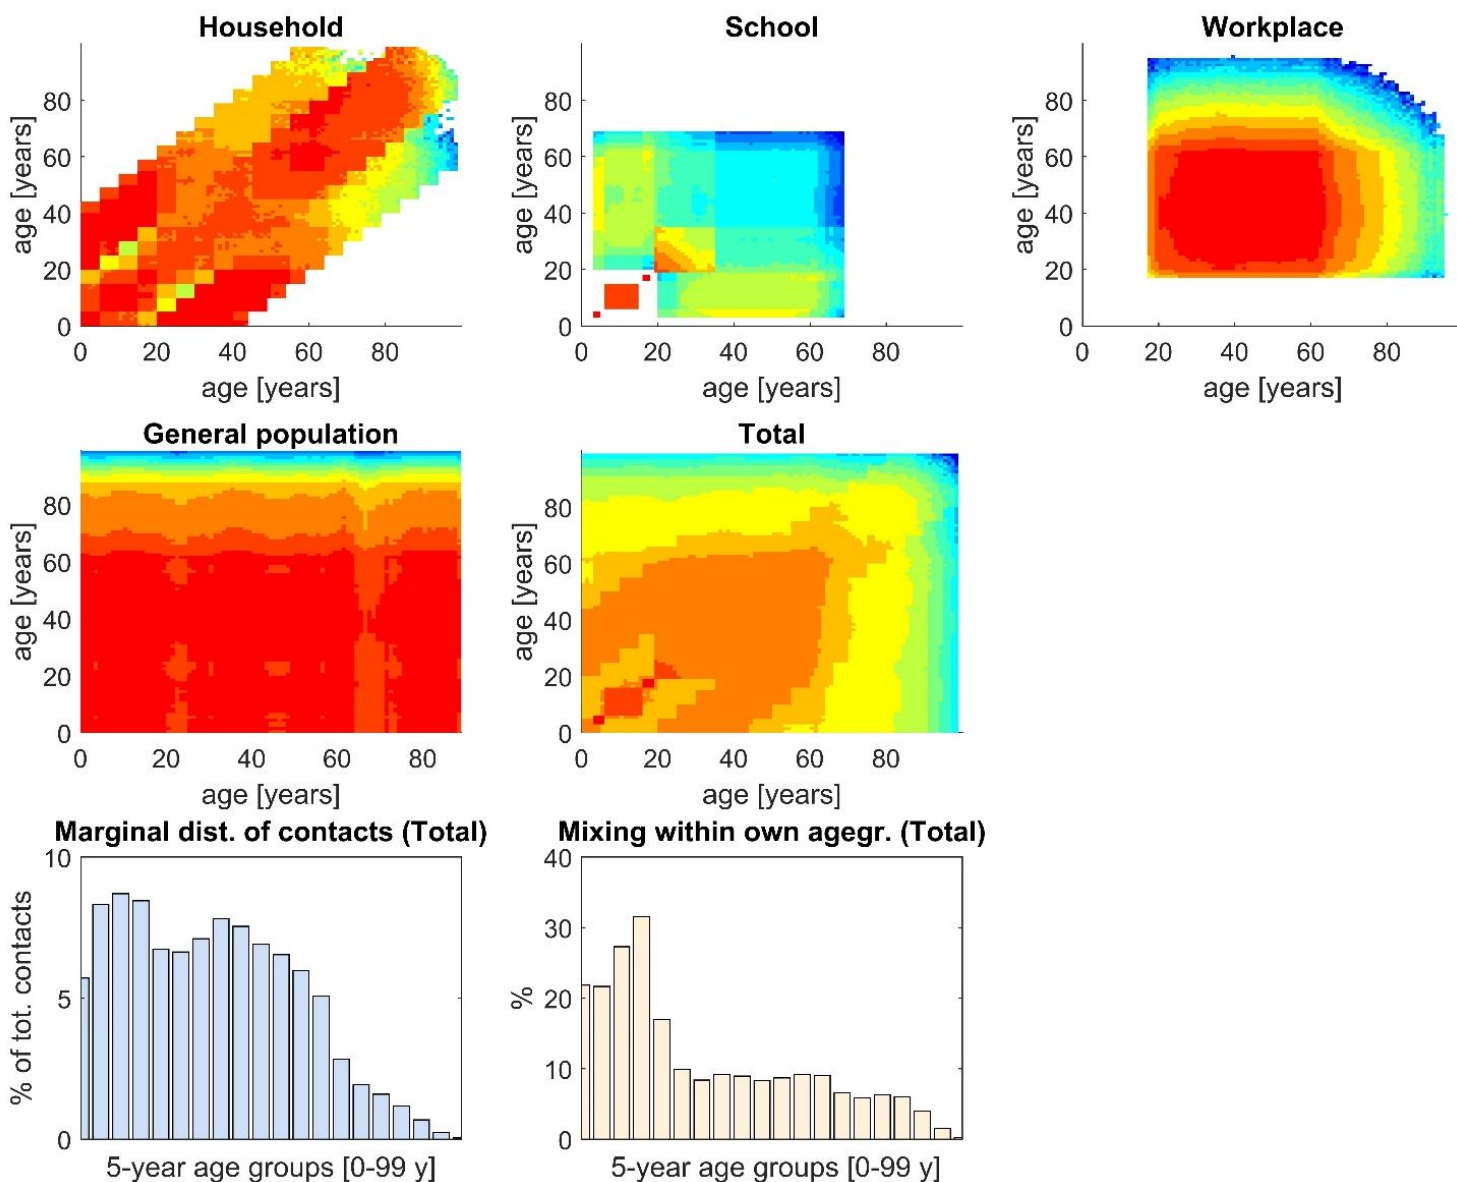

*Figure SMM1: Mixing patterns by age assumed in the model: Mixing matrices of the relative frequency of contacts among age classes in households, schools, workplace and the general population (top rows). The total mixing matrix was obtained as a weighted sum of the setting-specific matrices. The matrices are represented using a logarithmic scale (blue: low intensity; red: high intensity). The bottom row shows the marginal distribution of contacts (left) and the proportion of contacts with people of the same age (right) in the total matrix, aggregated into five-yearly age groups.*

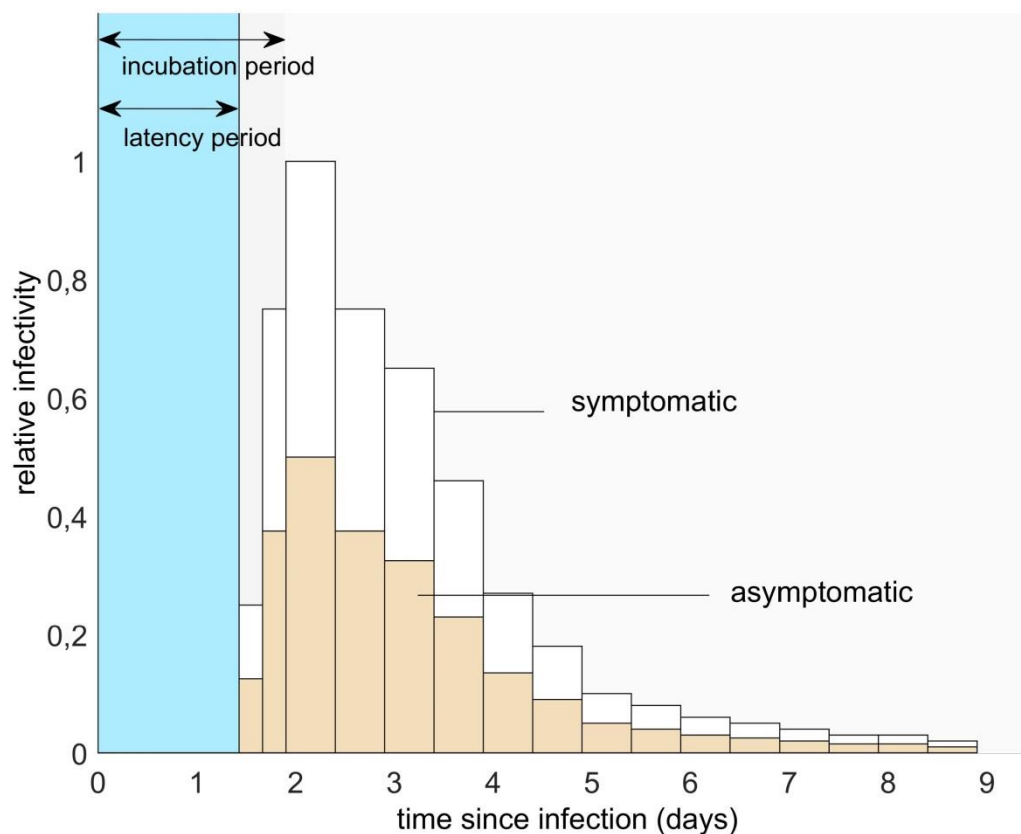

Figure SMM2: Schematic representation of the infectivity profile assumed in the model for individuals with symptomatic and asymptomatic influenza infection. The latency period is 1.5 days, the incubation period is 1.9 days, and infectivity peaks around 2 days after infection.

Recent analyses suggest that approximately 3 in 4 cases of seasonal and pandemic influenza are asymptomatic<sup>8</sup> and we assumed the baseline probability for symptomatic infection to be 0.35 for children <16 years and 0.25 for adults. However, in other scenarios we assumed that 50% of adults and 65% of children < 16 years develop symptoms in accordance with Longini et al.<sup>9</sup>. We assumed higher susceptibility and infectivity in children < 16 years of 1.05 and 1.30, respectively, compared to that of adults based on results from a Norwegian study using data from the 2009-H1N1 pandemic<sup>10</sup>.

We modelled pandemic influenza by assuming a fully susceptible population at the simulation outset and using basic reproductive numbers:  $R_0=1.4, 1.6, \text{ or } 1.8$ . For seasonal influenza we assumed that 0.075, 0.20, and 0.40 of children < 16 years, adults 16-69 years,

1  
2  
3 and elderly 70+ years were fully immune at the simulation outset based on personal  
4 communication with experts at the Norwegian Institute of Public Health. In these simulations  
5  
6 we considered effective reproductive numbers:  $R_{eff}=1.2, 1.3, \text{ and } 1.4$ .  
7  
8  
9

### 10 **Sensitivity analyses**

11  
12  
13 In the main scenarios we modelled sick leave by eliminating mixing at the workplace  
14 (0%) and in the general population (0%). There is lack of knowledge about how people  
15 behave during influenza sickness absence<sup>11</sup>, which impacts both their transmission potential  
16 and whom they will infect. We therefore performed sensitivity analyses by assuming that  
17 people during influenza sick leave would increase their likelihood of transmission in the  
18 household and in the general population. This was implemented in the model by adjusting the  
19 household mixing matrix (+10%) and the general population mixing matrix (-90%) compared  
20 to the mixing assumed in non-infected people at the same age.  
21  
22  
23  
24  
25  
26  
27  
28  
29  
30  
31

### 32 **COST-EFFECTIVENESS**

33 We developed a probabilistic health economic model to capture the health consequences,  
34 healthcare costs, productivity losses from work absences, and campaign cost for each  
35 intervention. The age-specific incidence of clinical events was based on results from the  
36 dynamic model. The probabilities of clinical events leading to a healthcare encounter (general  
37 practitioner (GP) visit or hospitalization) or death were taken from the Norwegian Pandemic  
38 Preparedness Plan<sup>12</sup>. The plan includes distinct morbidity estimates for moderate, severe, and  
39 very severe pandemics. The morbidity during seasonal influenza was assumed similar to a  
40 moderate pandemic (Table SMM1).  
41  
42  
43  
44  
45  
46  
47  
48  
49  
50  
51  
52  
53  
54  
55  
56  
57  
58  
59  
60



**Table SMM1: Parameters of the economic model. Mean values and distributions used for the cost-effectiveness analysis.**

| Parameter                                        | Mean value            | Distribution                               | Source               |
|--------------------------------------------------|-----------------------|--------------------------------------------|----------------------|
| <b>Probability of dying</b>                      |                       |                                            |                      |
| Seasonal /moderate pandemic                      | 0.15%                 | <i>Tri</i> (0.0015 ± 0.0009)               | *                    |
| Severe pandemic                                  | 0.22%                 | <i>Tri</i> (0.0022 ± 0.00132)              |                      |
| Very severe pandemic                             | 0.70%                 | <i>Tri</i> (0.0070 ± 0.0042)               |                      |
| <b>Probability of hospitalization</b>            |                       |                                            |                      |
| Seasonal / moderate                              | 0.75%                 | <i>Beta</i> (7.49,992)                     | **                   |
| Severe pandemic                                  | 2.0%                  | <i>Beta</i> (19.98,979)                    |                      |
| Very severe pandemic                             | 3.5%                  | <i>Beta</i> (34.97,964)                    |                      |
| <b>Probability of intensive care in hospital</b> |                       |                                            |                      |
| Seasonal / Moderate Pandemic                     | 10%                   | <i>Beta</i> (99,899)                       | **                   |
| Severe pandemic                                  | 17%                   | <i>Beta</i> (169,829)                      |                      |
| Very severe pandemic                             | 25%                   | <i>Beta</i> (250,749)                      |                      |
| <b>Probability of visiting a GP</b>              |                       |                                            |                      |
| Seasonal / moderate Pandemic                     | 15%                   | <i>Beta</i> (150,849)                      | **                   |
| Severe pandemic                                  | 20%                   | <i>Beta</i> (200,799)                      |                      |
| Very severe pandemic                             | 25%                   | <i>Beta</i> (250,749)                      |                      |
| Probability of working from home when ill        | 8%                    | <i>Beta</i> (929,10825)                    | ** <sup>12</sup>     |
| Daily productivity loss adults                   | Age-specific (5-year) | Log Normal, mean, 20% variation about mean | *** <sup>6</sup>     |
| Daily productivity loss caretakers               | \$337                 | <i>lnN</i> (337; 4543)                     | *** <sup>6</sup>     |
| Productivity lost before and after (per absence) | 5%                    | <i>lnN</i> (0.95,0.0361)                   | *** <sup>13</sup>    |
| Productivity when working from home/work         | 65%                   | <i>lnN</i> (0.65,0.017)                    | *** <sup>14-16</sup> |
| Cost of a GP consultation                        | \$ 68                 | <i>N</i> (68; 185)                         | # <sup>17 18</sup>   |
| <b>Cost of medications</b>                       |                       |                                            |                      |
| 0-14 years (+5% severe+10% very severe)          | \$10.6                | <i>N</i> (10.6,4.48)                       | # <sup>19 20</sup>   |
| 15-64 years (+5% severe+10% very severe)         | \$10.4                | <i>N</i> (10.4,4.32)                       | # <sup>19 20</sup>   |
| 65+ years (+5% severe+10% very severe)           | \$14                  | <i>N</i> (14,7.9)                          | # <sup>19 20</sup>   |
| <b>Cost of hospitalization</b>                   |                       |                                            |                      |
| Non-intensive care                               | \$9503                | <i>Gamma</i> (0.126; 75401)                | ## <sup>21</sup>     |
| Intensive care                                   | \$20435               | <i>Gamma</i> (4.3; 4768)                   | ## <sup>21</sup>     |
| <b>National cost of increasing adherence</b>     |                       |                                            |                      |
| to 80%                                           | \$2 147 397           | <i>N</i> (2040378, 408076 <sup>2</sup> )   |                      |
| to 90%                                           | \$3 006 356           | <i>N</i> (3490120, 698024 <sup>2</sup> )   |                      |
| <b>Cost of earlier onset of sick leave</b>       |                       |                                            |                      |
| 2 days of delay                                  | \$1 717 918           | <i>N</i> (1238321, 247664 <sup>2</sup> )   | # <sup>22</sup>      |
| 1.5 days of delay                                | \$1 932 658           | <i>N</i> (1762679, 352535 <sup>2</sup> )   |                      |
| 1 day of delay                                   | \$2 147 397           | <i>N</i> (2418124, 483625 <sup>2</sup> )   |                      |
| 0.5 days of delay                                | \$2 576 877           | <i>N</i> (3237432, 647486 <sup>2</sup> )   |                      |
| <b>QALY losses (per case)</b>                    |                       |                                            |                      |
| QALY loss un-hospitalized cases                  | 0.0078                | <i>lnN</i> (0.0078.0.000024)               | *** <sup>23 24</sup> |
| QALY loss hospitalized cases                     | 0.017                 | <i>lnN</i> (0.017.0.000012)                |                      |
| QALY loss influenza mortality                    | age-specific (1-year) | Normal, 20% variation about the mean       | PC                   |

\* Triangular distribution;  $\text{Tri}(a \pm b)$  has mean  $a$  and standard deviation  $b/\sqrt{6}$

\*\* Beta distribution;  $\text{Beta}(a,b)$  has mean  $a/(a+b)$  and standard deviation  $\sqrt{\frac{ab}{(a+b)^2(a+b+1)}}$

\*\*\* Log-normal distribution, parameters are mean and variance of this distribution, standard deviation is 20% of mean

# Normal distribution, parameters are mean and variance of this distribution, standard deviation is 20% of mean

## Gamma distribution;  $\text{Gamma}(a,b)$  has mean  $ab$  and standard deviation  $b\sqrt{a}$

*PC mean* =  $0.94 - 0.002 \times \text{age}$ . Personal communication with Kim Rand-Hendriksen(2014).

## HEALTHCARE COSTS

We compared the number of GP visits, hospitalizations, and deaths as well as the health-related quality of life, under each sick leave intervention, with the baseline intervention (Table SMM1). The cost of an influenza-related hospitalization was estimated using data from the Norwegian Patient Registry, on patients admitted with ICD-10 diagnoses J10-J11 (influenza) and J12-J18 (pneumonia) and discharged with influenza-associated diagnoses. We estimated the average hospitalization cost per patient by identifying the DRG codes most commonly related to influenza and pneumonia. For intensive care patients we used the DRG for diseases in respiratory organs requiring ventilation support as an estimate for the cost per hospitalized case. Costs were computed using the DRG unit price, trim points and cost weights (for 2013).<sup>21</sup> The cost of a GP consultation was assumed at \$68.<sup>17 18</sup>

## MEDICATION COSTS

The types of medication and proportion of users was based on findings in Meier et al.<sup>20</sup>, while use of throat drops and tissues was assumed. The cost of antibiotics was assumed equal to the cost of Fenoksymetylpenicillin<sup>19</sup> deducted VAT. Costs of over-the-counter drugs were based on the average cost at three pharmacies and four grocery stores in Oslo.

## CAMPAIGN COSTS

Each intervention was assumed to involve a campaign to communicate recommendations. We assumed the cost of the baseline intervention (65% compliance,

1  
2  
3 maximum of 4 days from symptom onset to sick leave) to be similar to the campaign cost  
4 associated with the 2009 H1N1 Pandemic in Norway (\$USD 1.7 million), equally divided  
5 into costs associated with adherence and sick leave onset delay. The campaign costs were  
6 assumed to increase by a factor of 1.5 per 10% increase in the adherence, and by a factor of  
7 1.25 per half day reduction in the maximum delay time to work absence. The costs were  
8 converted to 2012 monetary equivalents by adjusting for inflation.  
9  
10  
11  
12  
13  
14  
15  
16

### 17 **HEALTH EFFECTS**

18 Health related quality measures based on the EuroQol-5D<sup>25</sup> were used to compute  
19 QALYs (Quality Adjusted Life Years) associated with mortality and morbidity. QALYs  
20 associated with mortality were based on the expected value of remaining life years using age-  
21 dependent life-expectancies<sup>26</sup> with a yearly discount rate of 4%. The age distribution of deaths  
22 was based on those specified in a Norwegian study of seasonal influenza mortality<sup>27</sup>.  
23  
24  
25  
26  
27  
28  
29  
30

### 31 **INDIRECT COSTS**

32  
33  
34 In the baseline intervention (65% compliance, 4 days of maximum delay from  
35 symptoms onset to sick leave) we assumed that symptomatic workers would stay at home for  
36 an average of 3 workdays for seasonal influenza and 5.21 workdays for pandemic influenza,  
37 corresponding to 3.5 and 6.5 calendar days respectively. The average number of workdays  
38 lost was higher for interventions that reduced the delay from symptom onset to sick leave,  
39 following the implementation of interventions in the dynamic model.  
40  
41  
42  
43  
44  
45  
46  
47  
48

49 Productivity losses were valued using a human capital approach. Labor costs were  
50 based on full-time equivalent wages and the value of labor not returned to the worker. For  
51 sick adults, 5-year age-specific wage rates for ages 16-74<sup>6</sup> were used, and for caretakers the  
52 average population wage was used. In Norway, all employees have a right to at least 3 days of  
53 self-certified leave with full salary, while self-employed workers (8%) may take out insurance  
54  
55  
56  
57  
58  
59  
60

1  
2  
3 and their income loss during work absenteeism will depend on their insurance policy.<sup>28</sup> About  
4  
5 60% of employees have an inclusive-work life (IW) employer with more flexible sick leave  
6  
7 arrangements and a right to 8 days of self-certified leave. Once the self-certified sick leave  
8  
9 period ends, additional sick leave days require a GP certificate. The first 16 days are covered  
10  
11 by the employer, and additional days by the state.<sup>29-31</sup> For each sick leave event, we included  
12  
13 a productivity loss equal to 5% of the labor cost to account for productivity losses before and  
14  
15 after the sick leave period<sup>13</sup>. We assumed that 8% of adults on sick leave worked from home,  
16  
17 guided by the proportion working from home from a 2009 survey.<sup>12</sup> Sick persons working  
18  
19 from home, and workers going to work despite feeling ill were assumed to work at 65% of  
20  
21 full capacity<sup>14-16</sup> In Norway, parental leave is 1 year and parents have the right to care benefits  
22  
23 during child sickness when the child <12 years.<sup>32</sup> Therefore all ill children between 1 and 12  
24  
25 years of age were assumed to require parental care. We assumed that 15% of parents were  
26  
27 homemakers<sup>33</sup> with no associated productivity loss. Overlap between parental and child  
28  
29 sickness absences, which was found to be 37.5% in our sick leave survey, was also adjusted  
30  
31 for.  
32  
33  
34  
35  
36  
37

### 38 SENSITIVITY ANALYSES

39 For each epidemiological scenario (seasonal influenza  $R_{eff} = 1.2-1.4$  with moderate  
40 morbidity; pandemic influenza  $R_0 = 1.4-1.8$  with moderate, severe, or very severe morbidity)  
41 we performed a probabilistic sensitivity analysis using Monte Carlo sampling (10 000 draws)  
42 of the parameters listed in Table SMM1.  
43  
44  
45  
46  
47  
48  
49  
50  
51

### 52 SURVEY ON INFLUENZA-RELATED SICK LEAVE AMONG NORWEGIAN 53 EMPLOYEES

54 A questionnaire consisting of 14 questions was issued either electronically via  
55 Questback©, or on paper via personal distribution to a convenience sample of Norwegian  
56  
57 employees in the Oslo area between November 2013 and January 2014. The convenience  
58  
59  
60

1  
2  
3 sample was selected based on network recruitment, and consisted mainly of public sector  
4 employees. All data gathered on paper were folded and placed in an envelope, and were later  
5 entered into Questback©, and the original responses were destroyed. The data were stored in  
6 Questback© and analyzed in Excel 2013. Once analyses were completed the original data and  
7 any imported copies were deleted. The first 6 questions were concerning age, gender,  
8 inclusive work life status of employer, household size, the number of children below 12 years  
9 living in the household, and presence of influenza-like symptoms in the previous season  
10 (defined as August 2012 to April 2013). Questions 7-9 were only asked to the respondents  
11 who indicated having children below the age of 12 living in the household. The questions  
12 addressed: whether these children had experienced influenza-like symptoms in the previous  
13 winter, whether the children were sick simultaneously with the respondent, and if yes, the  
14 number of days of sickness overlap. The last 4 questions were asked to respondents who  
15 indicated having experienced influenza-like symptoms in the previous season. The  
16 respondents were asked to indicate the number of days of symptoms, the number of days  
17 spent at home from work during the symptomatic period (and which symptomatic days were  
18 spent at home), whether the days spent at home were GP-certified or self-certified, at what  
19 day of symptoms a physician was contacted, and on which days (if any) children below the  
20 age of 12 were sick simultaneously with the respondent.  
21  
22  
23  
24  
25  
26  
27  
28  
29  
30  
31  
32  
33  
34  
35  
36  
37  
38  
39  
40  
41  
42  
43  
44

45 A total of 490 employees completed the questionnaire. 72% of the respondents were  
46 females, and the remaining 28% were males. The age of the respondents ranged from 20 -70  
47 years, with a mean age of 46. Most (96%) of the employees had employers with an inclusive  
48 work life agreement (IW-agreement). There were no apparent differences between employees  
49 with and without IW-employers but the proportion of non-IW respondents was too small to  
50 meaningfully compare the two.  
51  
52  
53  
54  
55  
56  
57  
58  
59  
60

Among the 490 respondents, 224 reported having experienced symptoms of influenza last season. The number of days of symptoms varied from 1-20 days with a mean and median of approximately 6.5 and 5, respectively. Among the respondents that reported ILI symptoms, 161 respondents were absent from work, 58 respondents did not take time off work, the remaining 5 were missing. The duration of sick leave varied from 1-13 days, with a mean and median of 2.4 and 2 days, respectively.

Sick leave was initiated within 1-8 days after symptom onset. The shortest duration between sickness onset and sick leave was less than 1 day, and the longest duration was 7-8 days. (Figure SMM3). We did not collect any information about which factors affected the likelihood of staying at home. We suspect that in addition to having mild symptoms at onset, possible explanatory factors for delayed onset of sick leave may be social pressure or deadlines at work. In our paper we truncated the final category into 4 days or later (simulated as 4 days maximum) such that 24% took sick leave on the first day following symptom onset, 43% on the second day, 19% on the third day, and the remaining 14% on the 4<sup>th</sup> day or later.

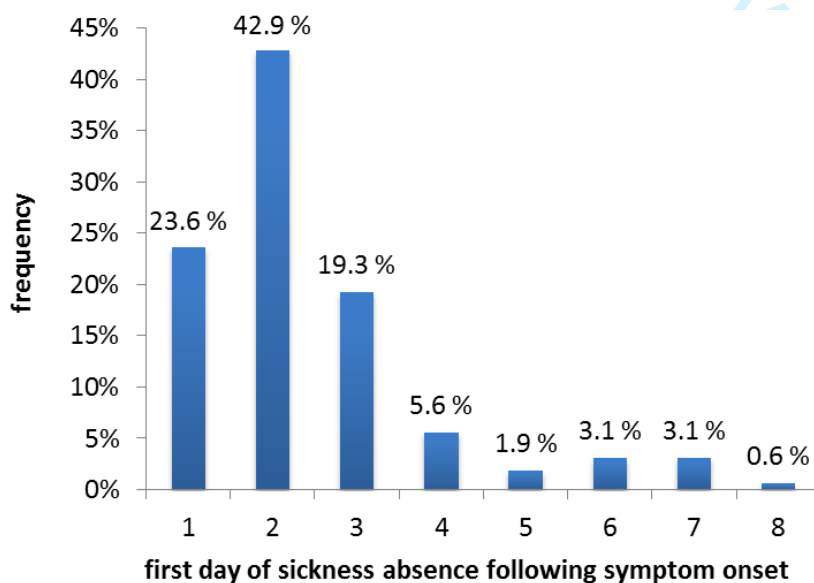

1  
2  
3 *Figure SMM3: Frequency distribution showing the timing of sick leave onset counted in days*  
4  
5 *from the time when symptom appeared (N=161)*  
6  
7  
8  
9

10 The sick leave periods mainly occurred over consecutive days, with the exception of 5  
11 respondents who reported intermittent sick leave histories. For the latter only the first sick  
12 leave period was counted. A total of 15 respondents reported being absent on one or more  
13 days without experiencing symptoms on these days; these sick leaves did not seem to be  
14 linked with sick children in the household.  
15  
16  
17  
18  
19  
20  
21  
22  
23  
24  
25  
26  
27  
28  
29  
30  
31  
32  
33  
34  
35  
36  
37  
38  
39  
40  
41  
42  
43  
44  
45  
46  
47  
48  
49  
50  
51  
52  
53  
54  
55  
56  
57  
58  
59  
60

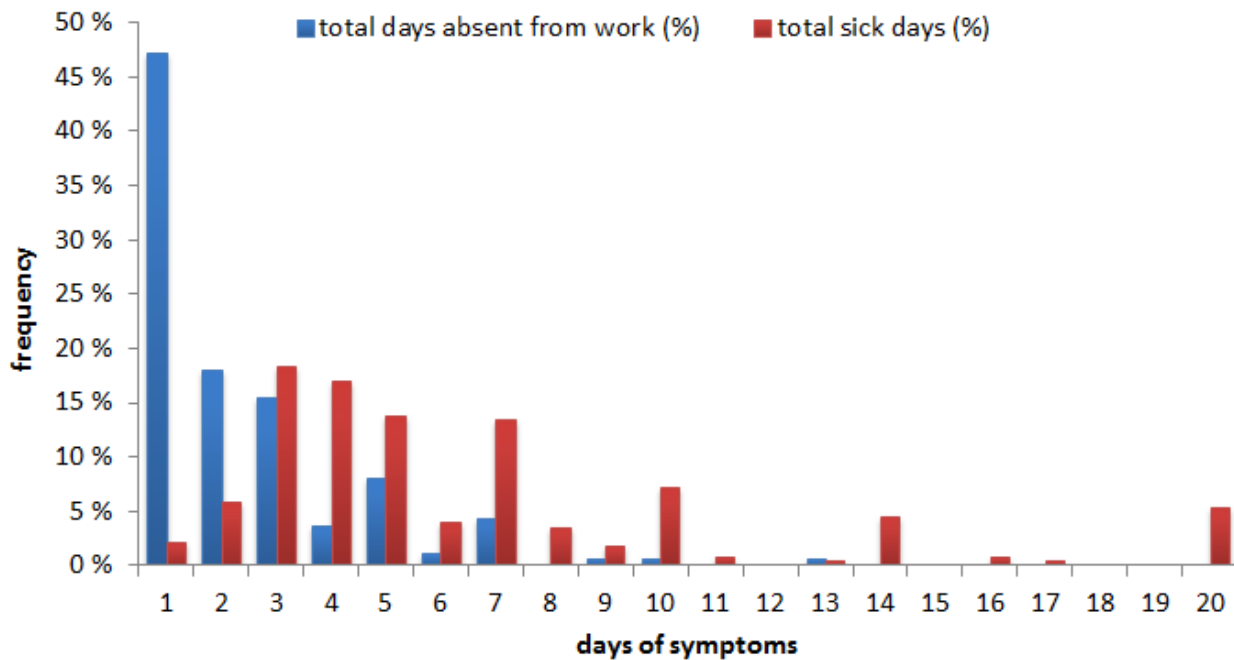

Figure SMM4: Frequency distributions showing the duration of symptoms ( $N=224$ ) and the distribution of days absent from work ( $N=161$ ) among respondents with ILI-symptoms.

Of the respondents that had influenza-like illness 20% reported visiting a GP for their symptoms, and 58% of these went on to take sick leave, while 42% continued to work. In total 14% of sick leaves were GP-certified, the remaining were self-certified.

Among the respondents, 155 said they had children <12 years in the household, 101/155 of the children had been ill in the past winter. The number of children was significantly correlated ( $p>0.01$ ) with ILI symptoms in parents. The frequency of ILI symptoms in respondents was 16% higher when the household had one or more children <12 years. There was also a strong correlation ( $p>0.01$ ) between experiencing ILI symptoms and having sick children. Although the correlation works from parent to child, and from child to parent, the latter is perhaps more correct as the sample of parents is non-random. If a child <12 in the household was ill, 74% of parents experienced ILI symptoms, otherwise 23% of parents experienced symptoms.



1  
2  
3 The survey was an attempt at providing a rough estimate of sick leave practice during  
4 influenza among the working population in Norway. Our sample is not representative of the  
5 Norwegian working population, and was largely made up of people working within health  
6 professions. Some respondents indicated that they had been on sick leave on days without  
7 symptoms (N = 6), this may be a result of measurement error or could reflect that the sick  
8 leave period was used in its full length as these sick leave periods were 7 days or longer.  
9  
10 Since we were asking about past health states and sick leave behavior, recall bias may have  
11 been a problem. In the responses replies involving round numbers (10 days, 20 days) were  
12 relatively more common. This may have been a result of recall bias.  
13  
14  
15  
16  
17  
18  
19  
20  
21  
22  
23  
24  
25  
26  
27  
28  
29  
30  
31  
32  
33  
34  
35  
36  
37  
38  
39  
40  
41  
42  
43  
44  
45  
46  
47  
48  
49  
50  
51  
52  
53  
54  
55  
56  
57  
58  
59  
60

## Survey on influenza-related sickness absence among Norwegian employees [August 2012 - April 2013]

*Please enter or circle your response*

|            |          |
|------------|----------|
| 1. Age:    |          |
| 2. Gender: | F      M |

|                                                                                                                                                            |           |
|------------------------------------------------------------------------------------------------------------------------------------------------------------|-----------|
| 3. Do you have an employer with an agreement about inclusive worklife (IW-agreement)?                                                                      | Yes    No |
| 4. How many people were living in your household last winter? (including yourself)                                                                         | Yes    No |
| 5. How many children under the age of 12 years were living in your household last winter?                                                                  | Yes    No |
| 6. Did you have flu-like symptoms last winter? Typical symptoms of flu are: fever / cough / sore throat / headache / fatigue / muscle pain / stuffy nose ) | Yes    No |

*(Questions 7-8 are only relevant if you had children under 12 years living in your household last winter)*

|                                                                                                                         |           |
|-------------------------------------------------------------------------------------------------------------------------|-----------|
| 7. Were any of the children (under 12 years living in the household) ill with flu-like symptoms in the previous winter? | Yes    No |
| 8. Were any children ill at the same time as you?                                                                       | Yes    No |

(Questions 9 to 15 are only relevant if you experienced influenza-like symptoms last winter)

| Please indicate the following by ticking the relevant day(s)                                              | Symptom start |       |       |       |       |       |       |       |       |        |        |        |        |        |        |        |        |        |        |        |  |                      |
|-----------------------------------------------------------------------------------------------------------|---------------|-------|-------|-------|-------|-------|-------|-------|-------|--------|--------|--------|--------|--------|--------|--------|--------|--------|--------|--------|--|----------------------|
|                                                                                                           | Day 1         | Day 2 | Day 3 | Day 4 | Day 5 | Day 6 | Day 7 | Day 8 | Day 9 | Day 10 | Day 11 | Day 12 | Day 13 | Day 14 | Day 15 | Day 16 | Day 17 | Day 18 | Day 19 | Day 20 |  |                      |
| 1. On which days did you experience influenza-like symptoms? (for how long were you ill?)                 |               |       |       |       |       |       |       |       |       |        |        |        |        |        |        |        |        |        |        |        |  | More than 14 days    |
| 2. On which days did you stay home from work?                                                             |               |       |       |       |       |       |       |       |       |        |        |        |        |        |        |        |        |        |        |        |  | No days              |
| 3. Which absence days were GP-certified?                                                                  |               |       |       |       |       |       |       |       |       |        |        |        |        |        |        |        |        |        |        |        |  | No days              |
| 4. On which day did you visit a GP?                                                                       |               |       |       |       |       |       |       |       |       |        |        |        |        |        |        |        |        |        |        |        |  | I did not visit a GP |
| 5. On which days were children less than 12 years living in your household experiencing symptoms as well? |               |       |       |       |       |       |       |       |       |        |        |        |        |        |        |        |        |        |        |        |  | Not relevant         |

## REFERENCES

1. Fumanelli L, Ajelli M, Manfredi P, Vespignani A, Merler S. Inferring the Structure of Social Contacts from Demographic Data in the Analysis of Infectious Diseases Spread. *PLOS Computational Biology*. 2012;8(9):e1002673.
2. Merler S, Ajelli M, Pugliese A, et al. Determinants of the Spatiotemporal Dynamics of the 2009 H1N1 Pandemic in Europe: Implications for Real-Time Modelling. *PLoS Comput Biol* 2011;7(9):e1002205. doi: 10.1371/journal.pcbi.1002205.
3. Ferguson NM, Cummings DA, Fraser C, et al. Strategies for mitigating an influenza pandemic. *Nature* 2006;442(7101):448-52. doi:10.1038/nature04795.
4. Cauchemez S, Valleron A-J, Boelle P-Y, et al. Estimating the impact of school closure on influenza transmission from Sentinel data. *Nature* 2008;452(7188):750-54. doi: 10.1038/nature06732.
5. Ferguson NM, Cummings DA, Cauchemez S, Fraser C, Riley S, Meeyai A, et al. Strategies for containing an emerging influenza pandemic in Southeast Asia. *Nature*. 2005;437(7056):209-14. doi:10.1038/nature04017.
6. Statistics Norway. 2014. Available from: <http://www.ssb.no/>.
7. Ghani A, Baguelin M, Griffin J, Flasche S, van Hoek AJ, Cauchemez S, et al. The early transmission dynamics of H1N1pdm influenza in the United Kingdom. *PLoS currents*. 2009;1.
8. Hayward AC, Fragaszy EB, Bermingham A, Wang L, Copas A, Edmunds WJ, et al. Comparative community burden and severity of seasonal and pandemic influenza: results of the Flu Watch cohort study. *The Lancet Respiratory Medicine*. 2014.

- 1  
2  
3 9. Longini IM, Nizam A, Xu S, Ungchusak K, Hanshaoworakul W, Cummings DA, et al.  
4  
5 Containing pandemic influenza at the source. *Science*. 2005;309(5737):1083-7.  
6  
7
- 8  
9 10. de Blasio BF, Iversen BG, Tomba GS. Effect of Vaccines and Antivirals during the Major  
10  
11 2009 A (H1N1) Pandemic Wave in Norway—And the Influence of Vaccination  
12  
13 Timing. *PloS one*. 2012;7(1):e30018.  
14  
15
- 16  
17 11. Edwards CH, Tomba GS, de Blasio BF. Influenza in workplaces: transmission, workers'  
18  
19 adherence to sick leave advice and European sick leave recommendations. *The*  
20  
21 *European Journal of Public Health* 2016;26(3):478-85.  
22  
23
- 24  
25 12. Ministry of Health and Care Services. Norwegian National Influenza Pandemic  
26  
27 Preparedness Plan 2014.  
28  
29
- 30  
31 13. Statistics Norway. Level of living 2009 - Cross sectional study - Working conditions  
32  
33 2012-10-09 ed: Norwegian Social Science Data Services (NSD); 2009.  
34  
35
- 36  
37 14. Brouwer WB, Van Exel N, Koopmanschap M, Rutten F. Productivity costs before and  
38  
39 after absence from work: as important as common? *Health Policy*. 2002;61(2):173-  
40  
41 87.  
42  
43
- 44  
45 15. Keech M, Scott A, Ryan P. The impact of influenza and influenza-like illness on  
46  
47 productivity and healthcare resource utilization in a working population.  
48  
49 *Occupational Medicine*. 1998;48(2):85-90.  
50  
51
- 52  
53 16. Palmer LA, Rousculp MD, Johnston SS, Mahadevia PJ, Nichol KL. Effect of influenza-  
54  
55 like illness and other wintertime respiratory illnesses on worker productivity: The  
56  
57 child and household influenza-illness and employee function (CHIEF) study.  
58  
59 *Vaccine*. 2010;28(31):5049-56.  
60

- 1  
2  
3 17. Smith A. A review of the effects of colds and influenza on human performance.  
4  
5 Occupational Medicine. 1989;39(2):65-8.  
6  
7  
8  
9 18. Den norske legeforening. Normaltariff for fastleger og legevakt 2013-2014 [07.07.2014].  
10  
11 Available from: [http://normaltariffen.legeforeningen.no/pdf/Fastlegetariff\\_2013.pdf](http://normaltariffen.legeforeningen.no/pdf/Fastlegetariff_2013.pdf).  
12  
13  
14 19. Romøren TI, Torjesen DO, Landmark B. Promoting coordination in Norwegian health  
15  
16 care. International Journal of Integrated Care. 2011;11(Special 10th Anniversary  
17  
18 Edition).  
19  
20  
21 20. Foreningen for utgivelse av norsk legemiddelhandbok. Norsk legemiddel håndbok for  
22  
23 helsepersonell 2013. Oslo: Fagbokforlaget; 2013.  
24  
25  
26  
27 21. Meier CR, Napalkov PN, Wegmüller Y, Jefferson T, Jick H. Population-Based Study on  
28  
29 Incidence, Risk Factors, Clinical Complications and Drug Utilisation Associated  
30  
31 with Influenza in the United Kingdom. European Journal of Clinical Microbiology  
32  
33 and Infectious Diseases. 2000;19(11):834-42. doi: 10.1007/s100960000376.  
34  
35  
36  
37 22. Norwegian Directorate of Health. Innsatsstyrt finansiering 2013. 2012.  
38  
39  
40 23. Norwegian Directorate for Civil Protection Rapport Ny influensa A (H1N1) 2009  
41  
42 Gjennomgang av erfaringene i Norge. 2nd ed, 2010.  
43  
44  
45  
46 24. Baguelin M, Jit M, Miller E, Edmunds WJ. Health and economic impact of the seasonal  
47  
48 influenza vaccination programme in England. Vaccine. 2012;30(23):3459-62.  
49  
50  
51 25. Van Hoek AJ, Underwood A, Jit M, Miller E, Edmunds WJ. The impact of pandemic  
52  
53 influenza H1N1 on health-related quality of life: a prospective population-based  
54  
55 study. PLoS One. 2011;6(3):e17030.  
56  
57  
58  
59 26. EuroQol Research Foundation. EQ-5D 2015. Available from: <http://www.euroqol.org/>.  
60

- 1  
2  
3 27. Statistics Norway. 2013 [updated 30.08.2013]. Available from: <http://www.ssb.no>.  
4  
5  
6  
7  
8  
9 28. Gran JM, Kacelnik O, Grjibovski AM, Aavitsland P, Iversen BG. Counting pandemic  
10 deaths: comparing reported numbers of deaths from influenza A (H1N1) pdm09 with  
11 estimated excess mortality. *Influenza and other respiratory viruses*. 2013;7(6):1370-  
12 9.  
13  
14  
15  
16  
17  
18  
19 29. Norwegian Labour and Welfare Administration. Sickness benefits for self-employed and  
20 freelancers. 2015  
21  
22  
23  
24 30. National Insurance Act. Act 1997-02-28-19. Act relating to national insurance Avd I 1997  
25 Nr. 5LOV-1997-02-28-19 [04.07.2014]. Available from:  
26  
27 <https://lovdata.no/dokument/NL/lov/1997-02-28-19>.  
28  
29  
30  
31  
32 31. Intensjonsavtale om et mer inkluderende arbeidsliv 4. mars 2014 - 31. desember 2018 (IA-  
33 avtalen) 2014 [04.07.2014]. Available from:  
34  
35 [https://www.regjeringen.no/globalassets/upload/asd/dokumenter/2014/ia\\_20142018/s](https://www.regjeringen.no/globalassets/upload/asd/dokumenter/2014/ia_20142018/signert_ia_avtale.pdf)  
36  
37  
38  
39  
40  
41  
42 32. Ose SO, Dyrstad K, Slettebak R, et al. Evaluering av IA-avtalen (2010-2013) 2013  
43 [03.07.2014]. Available from: [http://www.sintef.no/prosjekter/evaluering-av-ia-](http://www.sintef.no/prosjekter/evaluering-av-ia-avtalen-2010-2013/)  
44  
45  
46  
47  
48  
49  
50 33. Arbeids- og sosialdepartementet. Working Environment act. Act 2005-06-17-62. Act  
51 relating to working environment, working hours an employment protection, etc. as  
52 subsequently amended, last by act 23 February 2007-10. 2005  
53  
54  
55  
56  
57  
58  
59  
60

1  
2  
3 34. Ministry of Children Equality and Social Inclusion. Meld.St.6 En helhetlig  
4  
5 integreringspolitikk Mangfold og fellesskap, 2013.  
6  
7  
8  
9  
10  
11  
12  
13  
14  
15  
16  
17  
18  
19  
20  
21  
22  
23  
24  
25  
26  
27  
28  
29  
30  
31  
32  
33  
34  
35  
36  
37  
38  
39  
40  
41  
42  
43  
44  
45  
46  
47  
48  
49  
50  
51  
52  
53  
54  
55  
56  
57  
58  
59  
60

For peer review only



# Evaluating costs and health consequences of sick leave strategies against pandemic and seasonal influenza in Norway using a dynamic model

Christina Hansen Edwards<sup>1</sup>, Gianpaolo Scalia Tomba<sup>2</sup>, Ivar Sønnebø Kristiansen<sup>3</sup>, Richard White<sup>4</sup>, Birgitte Freiesleben de Blasio<sup>4,5</sup>

<sup>1</sup>Department of Health and Inequality, Norwegian Institute of Public Health, P.O. Box 0403. 4403 Nydalen, Oslo, Norway.

<sup>2</sup>Department of Mathematics, University of Rome Tor Vergata, Via Ricerca Scientifica 00133 Roma, Italy.

<sup>3</sup>Department of Health Management and Health Economics, Institute for Health and Society, University of Oslo. P.O.Box 1130. 0318 Blindern, Oslo, Norway.

<sup>4</sup>Department of Infectious Disease Epidemiology and Modelling, Norwegian Institute of Public Health, P.O. Box 0403. 4403 Nydalen, Oslo, Norway.

<sup>5</sup>Oslo Centre for Biostatistics and Epidemiology. Department of Biostatistics. Institute of Basic Medical Sciences. University of Oslo. P.O.Box 1122. 0317 Blindern, Oslo, Norway.

Correspondence to: CH Edwards [Christina.Hansen.Edwards@fhi.no](mailto:Christina.Hansen.Edwards@fhi.no)

## SUPPLEMENTARY FILE 2: TABLES

n

## Overview of tables

Section I: Scenarios with high symptomatic proportion (65% children, and 55% adults assumed to be symptomatic), without assuming extra mixing

|                                                          |    |
|----------------------------------------------------------|----|
| <b>A. Seasonal influenza</b> .....                       | 3  |
| i. Epidemiology ( $R_{eff} = 1.2, 1.3, 1.4$ ).....       | 3  |
| ii. Costs and effects ( $R_{eff} = 1.2, 1.3, 1.4$ )..... | 6  |
| <b>B. Moderate pandemic</b> .....                        | 9  |
| i. Epidemiology ( $R_0 = 1.4, 1.6, 1.8$ ).....           | 9  |
| ii. Costs and effects ( $R_0 = 1.4, 1.6, 1.8$ ).....     | 12 |
| <b>C. Severe pandemic</b> .....                          | 15 |
| i. Epidemiology ( $R_0 = 1.4, 1.6, 1.8$ ).....           | 15 |
| ii. Costs and effects ( $R_0 = 1.4, 1.6, 1.8$ ).....     | 18 |
| <b>D. Very severe pandemic</b> .....                     | 21 |
| i. Epidemiology ( $R_0 = 1.4, 1.6, 1.8$ ).....           | 21 |
| ii. Costs and effects ( $R_0 = 1.4, 1.6, 1.8$ ).....     | 24 |

Section II: Scenarios with high symptomatic proportion (65% children, and 55% adults assumed to be symptomatic), with extra mixing.....

|                                                          |    |
|----------------------------------------------------------|----|
| <b>A. Seasonal influenza</b> .....                       | 27 |
| i. Epidemiology ( $R_{eff} = 1.2, 1.3, 1.4$ ).....       | 27 |
| ii. Costs and effects ( $R_{eff} = 1.2, 1.3, 1.4$ )..... | 30 |
| <b>B. Moderate pandemic</b> .....                        | 33 |
| i. Epidemiology ( $R_0 = 1.4, 1.6, 1.8$ ).....           | 33 |
| ii. Costs and effects ( $R_0 = 1.4, 1.6, 1.8$ ).....     | 36 |
| <b>C. Severe pandemic</b> .....                          | 39 |
| i. Epidemiology ( $R_0 = 1.4, 1.6, 1.8$ ).....           | 39 |
| ii. Costs and effects ( $R_0 = 1.4, 1.6, 1.8$ ).....     | 42 |
| <b>D. Very severe pandemic</b> .....                     | 45 |
| i. Epidemiology ( $R_0 = 1.4, 1.6, 1.8$ ).....           | 45 |
| ii. Costs and effects ( $R_0 = 1.4, 1.6, 1.8$ ).....     | 48 |

Section III: Scenarios with low symptomatic proportion (35% children, and 25% adults assumed to be symptomatic), without assuming extra mixing

1 ..... 51

2

3 **A. Seasonal influenza** ..... 51

4 i. **Epidemiology ( $R_{eff} = 1.2, 1.3, 1.4$ )** ..... 51

5 ii. **Costs and effects ( $R_{eff} = 1.2, 1.3, 1.4$ )** ..... 54

6 **B. Moderate pandemic** ..... 57

7 i. **Epidemiology ( $R_0 = 1.4, 1.6, 1.8$ )** ..... 57

8 ii. **Costs and effects ( $R_0 = 1.4, 1.6, 1.8$ )** ..... 60

9 **C. Severe pandemic** ..... 63

10 i. **Epidemiology ( $R_0 = 1.4, 1.6, 1.8$ )** ..... 63

11 ii. **Costs and effects ( $R_0 = 1.4, 1.6, 1.8$ )** ..... 66

12 **D. Very severe pandemic** ..... 69

13 i. **Epidemiology ( $R_0 = 1.4, 1.6, 1.8$ )** ..... 69

14 ii. **Costs and effects ( $R_0 = 1.4, 1.6, 1.8$ )** ..... 72

15

16

17

18

19 Section IV: Scenarios with low symptomatic proportion (35% children, and 25% adults assumed to be symptomatic), with extra mixing ..... 75

20

21 **A. Seasonal influenza** ..... 75

22 i. **Epidemiology ( $R_{eff} = 1.2, 1.3, 1.4$ )** ..... 75

23 ii. **Costs and effects ( $R_{eff} = 1.2, 1.3, 1.4$ )** ..... 78

24 **B. Moderate pandemic** ..... 81

25 i. **Epidemiology ( $R_0 = 1.4, 1.6, 1.8$ )** ..... 81

26 ii. **Costs and effects ( $R_0 = 1.4, 1.6, 1.8$ )** ..... 84

27 **C. Severe pandemic** ..... 87

28 i. **Epidemiology ( $R_0 = 1.4, 1.6, 1.8$ )** ..... 87

29 ii. **Costs and effects ( $R_0 = 1.4, 1.6, 1.8$ )** ..... 90

30 **D. Very severe pandemic** ..... 93

31 i. **Epidemiology ( $R_0 = 1.4, 1.6, 1.8$ )** ..... 93

32 ii. **Costs and effects ( $R_0 = 1.4, 1.6, 1.8$ )** ..... 96

33

34

35

36

37

38

39

40

41

42

43

44

45

46

47

Section I: Scenarios with high symptomatic proportion (65% children, and 55% adults assumed to be symptomatic), without assuming extra mixing

## A. Seasonal influenza

### i. Epidemiology ( $R_{\text{eff}} = 1.2, 1.3, 1.4$ )

**Table S1 Seasonal influenza with  $R_{\text{eff}}=1.2$ : number of avoided cases, GP-visits, hospitalizations, and deaths associated with each sick leave intervention, assuming 65% of children and 55% adults are symptomatic, and no extra mixing.**

| Intervention |            | Median (0.25; 0.75 percentiles) relative to Baseline |                   |                      |                             |                        |                 |                                                    |
|--------------|------------|------------------------------------------------------|-------------------|----------------------|-----------------------------|------------------------|-----------------|----------------------------------------------------|
| % on leave   | Delay time | Symptomatic cases avoided                            | % Reduction in AR | GP-visits avoided    | Hospital admissions avoided | ICU admissions avoided | Avoided Deaths  | Mean workdays lost (proportion lost to caregiving) |
| 65%          | 0.5        | 85186                                                | 19 %              | 12733 (10835; 14834) | 614 (258; 1208)             | 61 (25; 122)           | 129 (68; 193)   | 611325 (0.35)                                      |
|              | 1          | 37294                                                | 8 %               | 5575 (4744; 6494)    | 269 (113; 529)              | 27 (11; 53)            | 57 (30; 84)     | 635984 (0.37)                                      |
|              | 1.5        | 18816                                                | 4 %               | 2813 (2393; 3277)    | 136 (57; 267)               | 13 (6; 27)             | 29 (15; 43)     | 613489 (0.4)                                       |
|              | 2          | 5791                                                 | 1 %               | 866 (737; 1008)      | 42 (18; 82)                 | 4 (2; 8)               | 9 (5; 13)       | 593800 (0.42)                                      |
| 80%          | 0.5        | 127113                                               | 28 %              | 19000 (16168; 22136) | 916 (385; 1803)             | 91 (37; 182)           | 193 (101; 287)  | 621708 (0.31)                                      |
|              | 1          | 70682                                                | 16 %              | 10565 (8990; 12309)  | 509 (214; 1003)             | 50 (21; 101)           | 107 (56; 160)   | 669174 (0.33)                                      |
|              | 1.5        | 48793                                                | 11 %              | 7293 (6206; 8497)    | 351 (148; 692)              | 35 (14; 70)            | 74 (39; 110)    | 650302 (0.36)                                      |
|              | 2          | 33292                                                | 7 %               | 4976 (4235; 5797)    | 240 (101; 472)              | 24 (10; 48)            | 50 (26; 75)     | 631865 (0.38)                                      |
| 90%          | 4          | 26413                                                | 6 %               | 3948 (3360; 4600)    | 190 (80; 375)               | 19 (8; 38)             | 40 (21; 60)     | 576120 (0.42)                                      |
|              | 0.5        | 154284                                               | 34 %              | 23062 (19624; 26867) | 1111 (468; 2188)            | 110 (45; 221)          | 234 (123; 349)  | 617623 (0.29)                                      |
|              | 1          | 92579                                                | 20 %              | 13838 (11775; 16122) | 667 (281; 1313)             | 66 (27; 133)           | 140 (74; 209)   | 682881 (0.31)                                      |
|              | 1.5        | 68498                                                | 15 %              | 10239 (8712; 11928)  | 493 (208; 972)              | 49 (20; 98)            | 104 (54; 155)   | 668042 (0.33)                                      |
| *65 %        | 2          | 51434                                                | 11 %              | 7688 (6542; 8957)    | 370 (156; 730)              | 37 (15; 74)            | 78 (41; 116)    | 651487 (0.35)                                      |
|              | 4          | 43842                                                | 10 %              | 6553 (5576; 7635)    | 316 (133; 622)              | 31 (13; 63)            | 66 (35; 99)     | 592942 (0.39)                                      |
| *65 %        | 4          | 453772                                               |                   | 67828 (57717; 79020) | 3268 (1376; 6436)           | 324 (133; 651)         | 688 (361; 1026) | 543911 (0.47)                                      |

\* This is the baseline intervention; values are reported in absolute terms, and not in terms of avoided cases.

**Table S2: Seasonal influenza with R\_eff=1.3: number of avoided cases, GP-visits, hospitalizations, and deaths associated with each sick leave intervention, assuming 65% of children and 55% adults are symptomatic, and no extra mixing.**

| Intervention |            |                           |                   | Median (0.25; 0.75 percentiles) relative to baseline |                             |                        |                  | Mean workdays lost (proportion lost to caregiving) |
|--------------|------------|---------------------------|-------------------|------------------------------------------------------|-----------------------------|------------------------|------------------|----------------------------------------------------|
| % on leave   | Delay time | Symptomatic cases avoided | % Reduction in AR | GP-visits avoided                                    | Hospital admissions avoided | ICU admissions avoided | Avoided Deaths   |                                                    |
| 65%          | 0.5        | 80329                     | 12 %              | 12007 (10217; 13989)                                 | 579 (244; 1139)             | 57 (24; 115)           | 122 (64; 182)    | 979137 (0.34)                                      |
|              | 1          | 35014                     | 5 %               | 5234 (4454; 6097)                                    | 252 (106; 497)              | 25 (10; 50)            | 53 (28; 79)      | 969403 (0.36)                                      |
|              | 1.5        | 17639                     | 3 %               | 2637 (2244; 3072)                                    | 127 (53; 250)               | 13 (5; 25)             | 27 (14; 40)      | 918680 (0.39)                                      |
|              | 2          | 5424                      | 1 %               | 811 (690; 945)                                       | 39 (16; 77)                 | 4 (2; 8)               | 8 (4; 12)        | 878566 (0.41)                                      |
| 80%          | 0.5        | 121972                    | 18 %              | 18232 (15514; 21240)                                 | 879 (370; 1730)             | 87 (36; 175)           | 185 (97; 276)    | 1046862 (0.3)                                      |
|              | 1          | 67693                     | 10 %              | 10119 (8610; 11788)                                  | 488 (205; 960)              | 48 (20; 97)            | 103 (54; 153)    | 1054240 (0.32)                                     |
|              | 1.5        | 46816                     | 7 %               | 6998 (5955; 8153)                                    | 337 (142; 664)              | 33 (14; 67)            | 71 (37; 106)     | 1001315 (0.34)                                     |
|              | 2          | 32090                     | 5 %               | 4797 (4082; 5588)                                    | 231 (97; 455)               | 23 (9; 46)             | 49 (26; 73)      | 958133 (0.37)                                      |
|              | 4          | 25562                     | 4 %               | 3821 (3251; 4451)                                    | 184 (78; 363)               | 18 (8; 37)             | 39 (20; 58)      | 866658 (0.41)                                      |
| 90%          | 0.5        | 149387                    | 22 %              | 22330 (19001; 26014)                                 | 1076 (453; 2119)            | 107 (44; 214)          | 227 (119; 338)   | 1079306 (0.28)                                     |
|              | 1          | 89371                     | 13 %              | 13359 (11367; 15563)                                 | 644 (271; 1268)             | 64 (26; 128)           | 136 (71; 202)    | 1101523 (0.3)                                      |
|              | 1.5        | 66182                     | 10 %              | 9893 (8418; 11525)                                   | 477 (201; 939)              | 47 (19; 95)            | 100 (53; 150)    | 1049057 (0.32)                                     |
|              | 2          | 49821                     | 7 %               | 7447 (6337; 8676)                                    | 359 (151; 707)              | 36 (15; 71)            | 76 (40; 113)     | 1005026 (0.34)                                     |
|              | 4          | 42574                     | 6 %               | 6364 (5415; 7414)                                    | 307 (129; 604)              | 30 (13; 61)            | 65 (34; 96)      | 906483 (0.38)                                      |
| *65%         | 4          | 670396                    |                   | 100208 (85270; 116743)                               | 4829 (2033; 9508)           | 479 (197; 961)         | 1017 (533; 1516) | 799480 (0.45)                                      |

\* This is the baseline intervention; values are reported in absolute terms, and not in terms of avoided cases.

**Table S3: Seasonal influenza with R<sub>eff</sub>=1.4: number of avoided cases, GP-visits, hospitalizations, and deaths associated with each sick leave intervention, assuming 65% of children and 55% adults are symptomatic, and no extra mixing.**

| Intervention |            |                           |                   | Median (0.25; 0.75 percentiles) relative to baseline |                             |                        |                  | Mean workdays lost (proportion lost to caregiving) |
|--------------|------------|---------------------------|-------------------|------------------------------------------------------|-----------------------------|------------------------|------------------|----------------------------------------------------|
| % on leave   | Delay time | Symptomatic cases avoided | % Reduction in AR | GP-visits avoided                                    | Hospital admissions avoided | ICU admissions avoided | Avoided Deaths   |                                                    |
| 65%          | 0.5        | 75094                     | 9 %               | 11225 (9551; 13077)                                  | 541 (228; 1065)             | 54 (22; 108)           | 114 (60; 170)    | 1289546 (0.33)                                     |
|              | 1          | 32607                     | 4 %               | 4874 (4147; 5678)                                    | 235 (99; 462)               | 23 (10; 47)            | 49 (26; 74)      | 1249090 (0.35)                                     |
|              | 1.5        | 16411                     | 2 %               | 2453 (2087; 2858)                                    | 118 (50; 233)               | 12 (5; 24)             | 25 (13; 37)      | 1173732 (0.38)                                     |
|              | 2          | 5042                      | 1 %               | 754 (641; 878)                                       | 36 (15; 72)                 | 4 (1; 7)               | 8 (4; 11)        | 1115893 (0.4)                                      |
| 80%          | 0.5        | 115520                    | 14 %              | 17268 (14693; 20117)                                 | 832 (350; 1638)             | 82 (34; 166)           | 175 (92; 261)    | 1409130 (0.29)                                     |
|              | 1          | 63970                     | 8 %               | 9562 (8137; 11140)                                   | 461 (194; 907)              | 46 (19; 92)            | 97 (51; 145)     | 1379795 (0.31)                                     |
|              | 1.5        | 44285                     | 5 %               | 6620 (5633; 7712)                                    | 319 (134; 628)              | 32 (13; 63)            | 67 (35; 100)     | 1296818 (0.34)                                     |
|              | 2          | 30449                     | 4 %               | 4551 (3873; 5302)                                    | 219 (92; 432)               | 22 (9; 44)             | 46 (24; 69)      | 1231906 (0.36)                                     |
| 90%          | 4          | 24317                     | 3 %               | 3635 (3093; 4235)                                    | 175 (74; 345)               | 17 (7; 35)             | 37 (19; 55)      | 1109496 (0.4)                                      |
|              | 0.5        | 142437                    | 17 %              | 21291 (18117; 24804)                                 | 1026 (432; 2020)            | 102 (42; 204)          | 216 (113; 322)   | 1475222 (0.27)                                     |
|              | 1          | 84951                     | 10 %              | 12698 (10805; 14793)                                 | 612 (258; 1205)             | 61 (25; 122)           | 129 (68; 192)    | 1457307 (0.29)                                     |
|              | 1.5        | 62932                     | 7 %               | 9407 (8005; 10959)                                   | 453 (191; 893)              | 45 (19; 90)            | 95 (50; 142)     | 1371294 (0.31)                                     |
| *65%         | 2          | 47462                     | 6 %               | 7094 (6037; 8265)                                    | 342 (144; 673)              | 34 (14; 68)            | 72 (38; 107)     | 1302964 (0.33)                                     |
|              | 4          | 40612                     | 5 %               | 6071 (5166; 7072)                                    | 293 (123; 576)              | 29 (12; 58)            | 62 (32; 92)      | 1169655 (0.37)                                     |
| *65%         | 4          | 852243                    |                   | 127390 (108399; 148410)                              | 6138 (2584; 12088)          | 608 (251; 1222)        | 1292 (678; 1927) | 1011674 (0.45)                                     |

\* This is the baseline intervention; values are reported in absolute terms, and not in terms of avoided cases.

**ii. Costs and effects (R\_eff = 1.2, 1.3, 1.4)**

**Table S4: Seasonal influenza with R\_eff=1.2: costs and benefits associated with each sick leave intervention relative to the baseline, assuming 65% of children and 55% of adults are symptomatic, and no extra mixing**

| Intervention | Mean costs (1000 USD) |           |                     |                  |                   |                          | Mean benefits            |             |             | Output measures |                    | Rank |
|--------------|-----------------------|-----------|---------------------|------------------|-------------------|--------------------------|--------------------------|-------------|-------------|-----------------|--------------------|------|
|              | % on leave            | Max. days | Productivity losses | Cost of campaign | GP-visits avoided | Hospitalisations avoided | Medication costs avoided | Total costs | QALYs saved | YPLL saved      | Mean NHB (QALYs)   |      |
| 65 %         | 0.5                   | 1490      | 3227                | 872              | 6807              | 905                      | -3867                    | 1326        | 330         | 1366            | 989 (657; 1594)    | 4    |
|              | 1                     | 23954     | 2411                | 382              | 2980              | 396                      | 22607                    | 581         | 145         | 350             | 185 (41; 450)      | 12   |
|              | 1.5                   | 20708     | 1757                | 193              | 1504              | 200                      | 20569                    | 293         | 73          | 83              | -1 (-73; 133)      | 13   |
|              | 2                     | 17008     | 1234                | 59               | 463               | 62                       | 17659                    | 90          | 22          | -90             | -115 (-138; -74)   | 14   |
| 80 %         | 0.5                   | -19631    | 5276                | 1301             | 10232             | 1351                     | -27238                   | 2015        | 493         | 2293            | 1697 (1214; 2617)  | 2    |
|              | 1                     | 13041     | 4456                | 723              | 5689              | 751                      | 10332                    | 1120        | 274         | 1015            | 683 (416; 1197)    | 6    |
|              | 1.5                   | 13018     | 3799                | 499              | 3928              | 519                      | 11872                    | 773         | 189         | 652             | 422 (238; 777)     | 9    |
|              | 2                     | 11291     | 3274                | 341              | 2680              | 354                      | 11191                    | 528         | 129         | 413             | 257 (131; 498)     | 11   |
|              | 4                     | -5723     | 2034                | 270              | 2111              | 281                      | -6351                    | 411         | 102         | 476             | 359 (256; 547)     | 10   |
| 90 %         | **0.5                 | -35480    | 6721                | 1579             | 12419             | 1640                     | -44397                   | 2445        | 598         | 2898            | 2172 (1589; 3294)  | 1    |
|              | 1                     | 4247      | 5901                | 948              | 7452              | 984                      | 764                      | 1467        | 359         | 1459            | 1023 (674; 1697)   | 3    |
|              | 1.5                   | 6641      | 5244                | 701              | 5514              | 728                      | 4943                     | 1086        | 265         | 1035            | 714 (454; 1210)    | 5    |
|              | 2                     | 6393      | 4719                | 526              | 4140              | 547                      | 5900                     | 815         | 199         | 755             | 515 (319; 885)     | 8    |
|              | 4                     | -10414    | 3479                | 449              | 3503              | 466                      | -11353                   | 682         | 170         | 798             | 604 (433; 915)     | 7    |
| *65 %        | 4                     | 211806    | 0                   | 4645             | 36094             | 4825                     | 257369                   | 7080        | 1764        | 10833           | 8823 (7078; 12075) |      |

\*Baseline intervention; values reported as absolute gains and losses.

\*\*optimal intervention.

**Table S5: Seasonal influenza with R\_eff=1.3: costs and benefits associated with each sick leave intervention relative to the baseline, assuming 65% of children and 55% of adults are symptomatic, and no extra mixing.**

| Intervention |           | Mean costs (1000 USD) |                  |                   |                          |                          | Mean benefits |             |            | Output measures  |                                    | Rank |
|--------------|-----------|-----------------------|------------------|-------------------|--------------------------|--------------------------|---------------|-------------|------------|------------------|------------------------------------|------|
| % on leave   | Max. days | Productivity losses   | Cost of campaign | GP-visits avoided | Hospitalisations avoided | Medication costs avoided | Total costs   | QALYs saved | YPLL saved | Mean NHB (QALYs) | Median NHB (0.25; 0.75 percentile) |      |
| 65 %         | 0.5       | 43872                 | 3227             | 822               | 6419                     | 854                      | 39004         | 1250        | 310        | 852              | 496 (186; 1067)                    | 4    |
|              | 1         | 53290                 | 2411             | 358               | 2798                     | 372                      | 52172         | 545         | 135        | 13               | -144 (-278; 106)                   | 12   |
|              | 1.5       | 39382                 | 1757             | 181               | 1410                     | 188                      | 39362         | 274         | 68         | -127             | -206 (-273; -80)                   | 13   |
|              | 2         | 27958                 | 1234             | 56                | 433                      | 58                       | 28646         | 84          | 21         | -208             | -231 (-253; -193)                  | 14   |
| 80 %         | 0.5       | 34259                 | 5276             | 1248              | 9818                     | 1297                     | 27171         | 1932        | 471        | 1655             | 1082 (620; 1967)                   | 2    |
|              | 1         | 53156                 | 4456             | 693               | 5449                     | 720                      | 50750         | 1072        | 261        | 554              | 237 (-21; 728)                     | 8    |
|              | 1.5       | 41397                 | 3799             | 479               | 3768                     | 498                      | 40451         | 741         | 181        | 329              | 109 (-68; 449)                     | 10   |
|              | 2         | 31125                 | 3274             | 328               | 2583                     | 341                      | 31147         | 508         | 124        | 190              | 40 (-81; 273)                      | 11   |
|              | 4         | 1855                  | 2034             | 262               | 2043                     | 272                      | 1313          | 398         | 99         | 384              | 272 (170; 453)                     | 7    |
| 90 %         | **0.5     | 25474                 | 6721             | 1529              | 12025                    | 1589                     | 17052         | 2366        | 577        | 2192             | 1489 (923; 2576)                   | 1    |
|              | 1         | 51220                 | 5901             | 915               | 7194                     | 950                      | 48062         | 1415        | 345        | 925              | 507 (167; 1153)                    | 3    |
|              | 1.5       | 41271                 | 5244             | 677               | 5327                     | 704                      | 39807         | 1048        | 255        | 642              | 333 (81; 812)                      | 6    |
|              | 2         | 31984                 | 4719             | 510               | 4010                     | 530                      | 31653         | 789         | 192        | 466              | 234 (43; 595)                      | 9    |
|              | 4         | 2077                  | 3479             | 436               | 3402                     | 453                      | 1266          | 662         | 164        | 649              | 463 (293; 764)                     | 5    |
| *65 %        | 4         | 311171                | 0                | 6862              | 53324                    | 7134                     | 378491        | 10455       | 2600       | 16007            | 13038 (10459; 17843)               |      |

\*Baseline intervention; values reported as absolute gains and losses.

\*\*optimal intervention.



**Table S6: Seasonal influenza with R\_eff=1.4: costs and benefits associated with each sick leave intervention relative to the baseline, assuming 65% of children and 55% of adults are symptomatic, and no extra mixing.**

| Intervention |           | Mean costs (1000 USD) |                  |                   |                          |                          | Mean benefits |             |            | Output measures  |                                    |      |
|--------------|-----------|-----------------------|------------------|-------------------|--------------------------|--------------------------|---------------|-------------|------------|------------------|------------------------------------|------|
| % on leave   | Max. days | Productivity losses   | Cost of campaign | GP-visits avoided | Hospitalisations avoided | Medication costs avoided | Total costs   | QALYs saved | YPLL saved | Mean NHB (QALYs) | Median NHB (0.25; 0.75 percentile) | Rank |
| 65 %         | 0.5       | 81422                 | 3227             | 769               | 6001                     | 799                      | 77081         | 1168        | 289        | 382              | 47 (-242; 582)                     | 5    |
|              | 1         | 78925                 | 2411             | 334               | 2606                     | 347                      | 78049         | 507         | 126        | -289             | -434 (-559; -201)                  | 12   |
|              | 1.5       | 55612                 | 1757             | 168               | 1311                     | 175                      | 55716         | 255         | 63         | -313             | -386 (-449; -269)                  | 14   |
|              | 2         | 37416                 | 1234             | 52                | 403                      | 54                       | 38143         | 78          | 19         | -311             | -332 (-352; -296)                  | 13   |
| 80 %         | 0.5       | 82904                 | 5276             | 1182              | 9299                     | 1229                     | 76469         | 1828        | 445        | 1049             | 505 (67; 1345)                     | 2    |
|              | 1         | 88826                 | 4456             | 655               | 5149                     | 681                      | 86797         | 1012        | 246        | 127              | -173 (-416; 291)                   | 9    |
|              | 1.5       | 66580                 | 3799             | 453               | 3565                     | 471                      | 65890         | 701         | 170        | 29               | -179 (-347; 142)                   | 10   |
|              | 2         | 48709                 | 3274             | 312               | 2451                     | 324                      | 48897         | 482         | 117        | -17              | -159 (-275; 63)                    | 11   |
| 90 %         | 4         | 8790                  | 2034             | 249               | 1943                     | 259                      | 8374          | 378         | 94         | 293              | 187 (88; 360)                      | 6    |
|              | **0.5     | 81119                 | 6721             | 1458              | 11465                    | 1516                     | 73402         | 2255        | 549        | 1506             | 838 (298; 1873)                    | 1    |
|              | 1         | 93400                 | 5901             | 870               | 6838                     | 904                      | 90690         | 1344        | 327        | 420              | 22 (-301; 636)                     | 4    |
|              | 1.5       | 72285                 | 5244             | 644               | 5066                     | 670                      | 71150         | 996         | 242        | 270              | -23 (-263; 434)                    | 7    |
| *65 %        | 2         | 54891                 | 4719             | 486               | 3820                     | 505                      | 54799         | 751         | 183        | 192              | -28 (-211; 316)                    | 8    |
|              | 4         | 13555                 | 3479             | 416               | 3245                     | 432                      | 12941         | 631         | 156        | 499              | 322 (158; 611)                     | 3    |
| *65 %        | 4         | 393610                | 0                | 8723              | 67789                    | 9077                     | 479198        | 13285       | 3299       | 20348            | 16573 (13298; 22686)               |      |

\*Baseline intervention; values reported as absolute gains and losses.

\*\*optimal intervention.

## B. Moderate pandemic

### i. Epidemiology ( $R_0 = 1.4, 1.6, 1.8$ )

**Table S7 Moderate pandemic influenza with  $R_0=1.4$ : number of avoided cases, GP-visits, hospitalizations, and deaths associated with each sick leave intervention, assuming 65% of children and 55% adults are symptomatic, and no extra mixing.**

| Intervention |            | Median (0.25; 0.75 percentiles) relative to baseline |                   |                         |                             |                        |                  |                | Mean workdays lost (proportion lost to caregiving) |
|--------------|------------|------------------------------------------------------|-------------------|-------------------------|-----------------------------|------------------------|------------------|----------------|----------------------------------------------------|
| % on leave   | Delay time | Symptomatic cases avoided                            | % Reduction in AR | GP-visits avoided       | Hospital admissions avoided | ICU admissions avoided | Avoided Deaths   |                |                                                    |
| 65%          | 0.5        | 109164                                               | 10 %              | 16317 (13885; 19010)    | 786 (331; 1548)             | 78 (32; 157)           | 166 (87; 247)    | 2513158 (0.19) |                                                    |
|              | 1          | 47149                                                | 4 %               | 7048 (5997; 8211)       | 340 (143; 669)              | 34 (14; 68)            | 72 (37; 107)     | 2516138 (0.19) |                                                    |
|              | 1.5        | 23671                                                | 2 %               | 3538 (3011; 4122)       | 170 (72; 336)               | 17 (7; 34)             | 36 (19; 54)      | 2431854 (0.2)  |                                                    |
|              | 2          | 7250                                                 | 1 %               | 1084 (922; 1263)        | 52 (22; 103)                | 5 (2; 10)              | 11 (6; 16)       | 2365359 (0.21) |                                                    |
| 80%          | 0.5        | 176143                                               | 16 %              | 26329 (22404; 30674)    | 1269 (534; 2498)            | 126 (52; 253)          | 267 (140; 398)   | 2774765 (0.16) |                                                    |
|              | 1          | 99304                                                | 9 %               | 14844 (12631; 17293)    | 715 (301; 1408)             | 71 (29; 142)           | 151 (79; 224)    | 2830269 (0.17) |                                                    |
|              | 1.5        | 70242                                                | 6 %               | 10500 (8934; 12232)     | 506 (213; 996)              | 50 (21; 101)           | 107 (56; 159)    | 2749509 (0.18) |                                                    |
|              | 2          | 49898                                                | 4 %               | 7459 (6347; 8689)       | 359 (151; 708)              | 36 (15; 72)            | 76 (40; 113)     | 2682841 (0.18) |                                                    |
| 90%          | 4          | 40919                                                | 4 %               | 6116 (5205; 7126)       | 295 (124; 580)              | 29 (12; 59)            | 62 (33; 93)      | 2521479 (0.19) |                                                    |
|              | 0.5        | 221326                                               | 20 %              | 33083 (28151; 38542)    | 1594 (671; 3139)            | 158 (65; 317)          | 336 (176; 500)   | 2908475 (0.15) |                                                    |
|              | 1          | 134589                                               | 12 %              | 20118 (17119; 23437)    | 969 (408; 1909)             | 96 (40; 193)           | 204 (107; 304)   | 3009496 (0.15) |                                                    |
|              | 1.5        | 101715                                               | 9 %               | 15204 (12937; 17713)    | 733 (308; 1443)             | 73 (30; 146)           | 154 (81; 230)    | 2936109 (0.16) |                                                    |
| *65%         | 2          | 78731                                                | 7 %               | 11768 (10014; 13710)    | 567 (239; 1117)             | 56 (23; 113)           | 119 (63; 178)    | 2872537 (0.17) |                                                    |
|              | 4          | 68589                                                | 6 %               | 10252 (8724; 11944)     | 494 (208; 973)              | 49 (20; 98)            | 104 (55; 155)    | 2700139 (0.18) |                                                    |
| *65%         | 4          | 1125097                                              |                   | 168175 (143104; 195925) | 8104 (3412; 15958)          | 803 (331; 1613)        | 1706 (895; 2543) | 2224435 (0.23) |                                                    |

\* This is the baseline intervention; values are reported in absolute terms, and not in terms of avoided cases.

**Table S8: Moderate pandemic influenza with R<sub>0</sub>=1.6: number of avoided cases, GP-visits, hospitalizations, and deaths associated with each sick leave intervention, assuming 65% of children and 55% adults are symptomatic, and no extra mixing.**

| Intervention |            | Median (0.25; 0.75 percentiles) relative to baseline |                   |                         |                             |                        |                   |                | Mean workdays lost (proportion lost to caregiving) |
|--------------|------------|------------------------------------------------------|-------------------|-------------------------|-----------------------------|------------------------|-------------------|----------------|----------------------------------------------------|
| % on leave   | Delay time | Symptomatic cases avoided                            | % Reduction in AR | GP-visits avoided       | Hospital admissions avoided | ICU admissions avoided | Avoided Deaths    |                |                                                    |
| 65%          | 0.5        | 91511                                                | 6 %               | 13679 (11640; 15936)    | 659 (277; 1298)             | 65 (27; 131)           | 139 (73; 207)     | 3473688 (0.18) |                                                    |
|              | 1          | 39318                                                | 3 %               | 5877 (5001; 6847)       | 283 (119; 558)              | 28 (12; 56)            | 60 (31; 89)       | 3396347 (0.19) |                                                    |
|              | 1.5        | 19698                                                | 1 %               | 2944 (2505; 3430)       | 142 (60; 279)               | 14 (6; 28)             | 30 (16; 45)       | 3253841 (0.2)  |                                                    |
|              | 2          | 6028                                                 | 0 %               | 901 (767; 1050)         | 43 (18; 85)                 | 4 (2; 9)               | 9 (5; 14)         | 3145771 (0.2)  |                                                    |
| 80%          | 0.5        | 149846                                               | 10 %              | 22398 (19059; 26094)    | 1079 (454; 2125)            | 107 (44; 215)          | 227 (119; 339)    | 3944812 (0.15) |                                                    |
|              | 1          | 84044                                                | 6 %               | 12563 (10690; 14635)    | 605 (255; 1192)             | 60 (25; 120)           | 127 (67; 190)     | 3899235 (0.16) |                                                    |
|              | 1.5        | 59422                                                | 4 %               | 8882 (7558; 10348)      | 428 (180; 843)              | 42 (17; 85)            | 90 (47; 134)      | 3745061 (0.17) |                                                    |
|              | 2          | 42244                                                | 3 %               | 6314 (5373; 7356)       | 304 (128; 599)              | 30 (12; 61)            | 64 (34; 95)       | 3626021 (0.18) |                                                    |
| 90%          | 4          | 34695                                                | 2 %               | 5186 (4413; 6042)       | 250 (105; 492)              | 25 (10; 50)            | 53 (28; 78)       | 3394931 (0.19) |                                                    |
|              | 0.5        | 189865                                               | 13 %              | 28380 (24149; 33063)    | 1368 (576; 2693)            | 136 (56; 272)          | 288 (151; 429)    | 4219177 (0.14) |                                                    |
|              | 1          | 114653                                               | 8 %               | 17138 (14583; 19966)    | 826 (348; 1626)             | 82 (34; 164)           | 174 (91; 259)     | 4206207 (0.15) |                                                    |
|              | 1.5        | 86523                                                | 6 %               | 12933 (11005; 15067)    | 623 (262; 1227)             | 62 (25; 124)           | 131 (69; 196)     | 4049294 (0.15) |                                                    |
| *65%         | 2          | 66968                                                | 4 %               | 10010 (8518; 11662)     | 482 (203; 950)              | 48 (20; 96)            | 102 (53; 151)     | 3926011 (0.16) |                                                    |
|              | 4          | 58372                                                | 4 %               | 8725 (7425; 10165)      | 420 (177; 828)              | 42 (17; 84)            | 89 (46; 132)      | 3674339 (0.17) |                                                    |
|              |            | 1492094                                              |                   | 223033 (189784; 259834) | 10747 (4525; 21163)         | 1065 (439; 2139)       | 2263 (1187; 3373) | 2949234 (0.22) |                                                    |

\* This is the baseline intervention; values are reported in absolute terms, and not in terms of avoided cases.

**Table S9: Moderate pandemic influenza with R<sub>0</sub>=1.8: number of avoided cases, GP-visits, hospitalizations, and deaths associated with each sick leave intervention, assuming 65% of children and 55% adults are symptomatic, and no extra mixing.**

| Intervention |            | Median (0.25; 0.75 percentiles) relative to baseline |                   |                         |                             |                        |                   | Mean workdays lost (proportion lost to caregiving) |
|--------------|------------|------------------------------------------------------|-------------------|-------------------------|-----------------------------|------------------------|-------------------|----------------------------------------------------|
| % on leave   | Delay time | Symptomatic cases avoided                            | % Reduction in AR | GP-visits avoided       | Hospital admissions avoided | ICU admissions avoided | Avoided Deaths    |                                                    |
| 65%          | 0.5        | 76740                                                | 4 %               | 11471 (9761; 13364)     | 553 (233; 1088)             | 55 (23; 110)           | 116 (61; 173)     | 4175375 (0.17)                                     |
|              | 1          | 32850                                                | 2 %               | 4910 (4178; 5721)       | 237 (100; 466)              | 23 (10; 47)            | 50 (26; 74)       | 4035387 (0.18)                                     |
|              | 1.5        | 16437                                                | 1 %               | 2457 (2091; 2862)       | 118 (50; 233)               | 12 (5; 24)             | 25 (13; 37)       | 3848981 (0.19)                                     |
|              | 2          | 5025                                                 | 0 %               | 751 (639; 875)          | 36 (15; 71)                 | 4 (1; 7)               | 8 (4; 11)         | 3709748 (0.2)                                      |
| 80%          | 0.5        | 126899                                               | 7 %               | 18968 (16141; 22098)    | 914 (385; 1800)             | 91 (37; 182)           | 192 (101; 287)    | 4808812 (0.15)                                     |
|              | 1          | 70896                                                | 4 %               | 10597 (9017; 12346)     | 511 (215; 1006)             | 51 (21; 102)           | 108 (56; 160)     | 4681758 (0.16)                                     |
|              | 1.5        | 50097                                                | 3 %               | 7488 (6372; 8724)       | 361 (152; 711)              | 36 (15; 72)            | 76 (40; 113)      | 4471246 (0.16)                                     |
|              | 2          | 35652                                                | 2 %               | 5329 (4535; 6208)       | 257 (108; 506)              | 25 (10; 51)            | 54 (28; 81)       | 4312214 (0.17)                                     |
| 90%          | 4          | 29300                                                | 2 %               | 4380 (3727; 5102)       | 211 (89; 416)               | 21 (9; 42)             | 44 (23; 66)       | 4029281 (0.18)                                     |
|              | 0.5        | 161725                                               | 9 %               | 24174 (20570; 28163)    | 1165 (490; 2294)            | 115 (48; 232)          | 245 (129; 366)    | 5194371 (0.14)                                     |
|              | 1          | 97147                                                | 6 %               | 14521 (12356; 16917)    | 700 (295; 1378)             | 69 (29; 139)           | 147 (77; 220)     | 5087180 (0.14)                                     |
|              | 1.5        | 73232                                                | 4 %               | 10946 (9315; 12753)     | 527 (222; 1039)             | 52 (22; 105)           | 111 (58; 166)     | 4865331 (0.15)                                     |
| *65%         | 2          | 56670                                                | 3 %               | 8471 (7208; 9869)       | 408 (172; 804)              | 40 (17; 81)            | 86 (45; 128)      | 4696014 (0.16)                                     |
|              | 4          | 49402                                                | 3 %               | 7384 (6284; 8603)       | 356 (150; 701)              | 35 (15; 71)            | 75 (39; 112)      | 4385040 (0.17)                                     |
| *65%         | 4          | 1758906                                              |                   | 262915 (223721; 306297) | 12669 (5334; 24947)         | 1256 (517; 2522)       | 2667 (1399; 3976) | 3472158 (0.21)                                     |

\* This is the baseline intervention; values are reported in absolute terms, and not in terms of avoided cases.

**ii. Costs and effects (R<sub>0</sub> = 1.4, 1.6, 1.8)**

**Table S10: Moderate pandemic influenza with R<sub>0</sub>=1.4: costs and benefits associated with each sick leave intervention relative to the baseline, assuming 65% of children and 55% of adults are symptomatic, and no extra mixing.**

| Intervention |           | Mean costs (1000 USD) |                  |                   |                          |                          | Mean benefits |             |            | Output measures  |                                    | Rank |
|--------------|-----------|-----------------------|------------------|-------------------|--------------------------|--------------------------|---------------|-------------|------------|------------------|------------------------------------|------|
| % on leave   | Max. days | Productivity losses   | Cost of campaign | GP-visits avoided | Hospitalisations avoided | Medication costs avoided | Total costs   | QALYs saved | YPLL saved | Mean NHB (QALYs) | Median NHB (0.25; 0.75 percentile) | Rank |
| 65 %         | 0.5       | 36981                 | 3227             | 1117              | 8723                     | 1164                     | 29204         | 1724        | 441        | 1426             | 941 (517; 1721)                    | 3    |
|              | 1         | 78227                 | 2411             | 483               | 3768                     | 503                      | 75885         | 744         | 190        | -30              | -241 (-422; 96)                    | 12   |
|              | 1.5       | 62018                 | 1757             | 242               | 1892                     | 252                      | 61389         | 374         | 96         | -252             | -358 (-449; -189)                  | 13   |
|              | 2         | 47900                 | 1234             | 74                | 579                      | 77                       | 48404         | 114         | 29         | -379             | -410 (-439; -358)                  | 14   |
| 80 %         | 0.5       | 18067                 | 5276             | 1803              | 14178                    | 1878                     | 5484          | 2829        | 711        | 2774             | 1952 (1278; 3216)                  | 2    |
|              | 1         | 87467                 | 4456             | 1016              | 7993                     | 1059                     | 81854         | 1594        | 400        | 759              | 298 (-83; 1019)                    | 7    |
|              | 1.5       | 79037                 | 3799             | 719               | 5654                     | 749                      | 75715         | 1127        | 282        | 355              | 29 (-241; 541)                     | 10   |
|              | 2         | 69723                 | 3274             | 511               | 4016                     | 532                      | 67938         | 800         | 200        | 108              | -117 (-317; 242)                   | 11   |
|              | 4         | 20577                 | 2034             | 419               | 3270                     | 436                      | 18487         | 645         | 164        | 456              | 282 (114; 576)                     | 9    |
| 90 %         | **0.5     | -3233                 | 6721             | 2265              | 17815                    | 2360                     | -18952        | 3555        | 894        | 3749             | 2718 (1870; 4325)                  | 1    |
|              | 1         | 86996                 | 5901             | 1378              | 10834                    | 1435                     | 79251         | 2161        | 542        | 1352             | 729 (209; 1706)                    | 4    |
|              | 1.5       | 84859                 | 5244             | 1041              | 8187                     | 1084                     | 79791         | 1632        | 409        | 819              | 353 (-43; 1091)                    | 5    |
|              | 2         | 79416                 | 4719             | 806               | 6337                     | 839                      | 76152         | 1263        | 316        | 486              | 135 (-183; 701)                    | 8    |
|              | 4         | 29984                 | 3479             | 702               | 5481                     | 731                      | 26549         | 1081        | 275        | 810              | 517 (236; 1008)                    | 6    |
| *65 %        | 4         | 849556                | 0                | 11516             | 89492                    | 12003                    | 962567        | 17912       | 4690       | 34343            | 29395 (25035; 37393)               |      |

\*Baseline intervention; values reported as absolute gains and losses.

\*\*optimal intervention.

**Table S11: Moderate pandemic influenza with R<sub>0</sub>=1.6: costs and benefits associated with each sick leave intervention relative to the baseline, assuming 65% of children and 55% of adults are symptomatic, and no extra mixing.**

| Intervention |           | Mean costs (1000 USD) |                  |                   |                          |                          | Mean benefits |             |            | Output measures  |                                    |      |
|--------------|-----------|-----------------------|------------------|-------------------|--------------------------|--------------------------|---------------|-------------|------------|------------------|------------------------------------|------|
| % on leave   | Max. days | Productivity losses   | Cost of campaign | GP-visits avoided | Hospitalisations avoided | Medication costs avoided | Total costs   | QALYs saved | YPLL saved | Mean NHB (QALYs) | Median NHB (0.25; 0.75 percentile) | Rank |
| 65 %         | 0.5       | 134416                | 3227             | 937               | 7313                     | 977                      | 128417        | 1438        | 362        | 129              | -281 (-633; 375)                   | 3    |
|              | 1         | 140544                | 2411             | 402               | 3142                     | 420                      | 138991        | 618         | 156        | -800             | -974 (-1126; -694)                 | 14   |
|              | 1.5       | 100513                | 1757             | 202               | 1574                     | 210                      | 100285        | 309         | 78         | -713             | -799 (-876; -659)                  | 13   |
|              | 2         | 69362                 | 1234             | 62                | 482                      | 64                       | 69989         | 95          | 24         | -619             | -643 (-670; -599)                  | 10   |
| 80 %         | 0.5       | 166338                | 5276             | 1534              | 12062                    | 1600                     | 156418        | 2396        | 592        | 801              | 100 (-471; 1191)                   | 2    |
|              | 1         | 195492                | 4456             | 860               | 6765                     | 898                      | 191425        | 1343        | 331        | -609             | -999 (-1323; -387)                 | 8    |
|              | 1.5       | 159571                | 3799             | 608               | 4783                     | 635                      | 157344        | 949         | 234        | -655             | -923 (-1161; -494)                 | 12   |
|              | 2         | 130620                | 3274             | 432               | 3400                     | 451                      | 129610        | 675         | 166        | -647             | -830 (-1007; -524)                 | 11   |
| 90 %         | 4         | 56838                 | 2034             | 355               | 2772                     | 371                      | 55374         | 544         | 136        | -21              | -160 (-312; 91)                    | 5    |
|              | **0.5     | 178317                | 6721             | 1943              | 15283                    | 2028                     | 165785        | 3036        | 750        | 1345             | 467 (-266; 1845)                   | 1    |
|              | 1         | 225494                | 5901             | 1174              | 9229                     | 1224                     | 219768        | 1832        | 452        | -409             | -927 (-1384; -99)                  | 6    |
|              | 1.5       | 193538                | 5244             | 886               | 6965                     | 924                      | 190008        | 1382        | 340        | -556             | -938 (-1291; -310)                 | 7    |
| *65 %        | 2         | 166726                | 4719             | 685               | 5391                     | 715                      | 164655        | 1069        | 263        | -610             | -896 (-1180; -412)                 | 9    |
|              | 4         | 90551                 | 3479             | 597               | 4665                     | 623                      | 88145         | 916         | 229        | 17               | -219 (-473; 202)                   | 4    |
| *65 %        | 4         | 1126217               | 0                | 15272             | 118683                   | 15947                    | 1276119       | 23709       | 6165       | 45580            | 39025 (33234; 49618)               |      |

\*Baseline intervention; values reported as absolute gains and losses.

\*\*optimal intervention.

**Table S12: Moderate pandemic influenza with R<sub>0</sub>=1.8: costs and benefits associated with each sick leave intervention relative to the baseline, assuming 65% of children and 55% of adults are symptomatic, and no extra mixing.**

| Intervention |           | Mean costs (1000 USD) |                  |                   |                          |                          | Mean benefits |             |            | Output measures  |                                    |      |
|--------------|-----------|-----------------------|------------------|-------------------|--------------------------|--------------------------|---------------|-------------|------------|------------------|------------------------------------|------|
| % on leave   | Max. days | Productivity losses   | Cost of campaign | GP-visits avoided | Hospitalisations avoided | Medication costs avoided | Total costs   | QALYs saved | YPLL saved | Mean NHB (QALYs) | Median NHB (0.25; 0.75 percentile) | Rank |
| 65 %         | 0.5       | 210005                | 3227             | 785               | 6132                     | 821                      | 205494        | 1202        | 299        | -894             | -1236 (-1530; -689)                | 6    |
|              | 1         | 187855                | 2411             | 336               | 2625                     | 352                      | 186953        | 514         | 128        | -1392            | -1535 (-1665; -1302)               | 9    |
|              | 1.5       | 129498                | 1757             | 168               | 1313                     | 176                      | 129597        | 257         | 64         | -1064            | -1134 (-1200; -1016)               | 7    |
|              | 2         | 85337                 | 1234             | 51                | 402                      | 54                       | 86065         | 79          | 20         | -799             | -817 (-843; -779)                  | 5    |
| 80 %         | 0.5       | 283680                | 5276             | 1299              | 10215                    | 1358                     | 276085        | 2022        | 493        | -794             | -1385 (-1871; -462)                | 4    |
|              | 1         | 279186                | 4456             | 726               | 5707                     | 759                      | 276450        | 1129        | 275        | -1690            | -2014 (-2292; -1500)               | 13   |
|              | 1.5       | 221679                | 3799             | 513               | 4032                     | 536                      | 220397        | 797         | 194        | -1450            | -1670 (-1876; -1306)               | 10   |
|              | 2         | 177379                | 3274             | 365               | 2870                     | 382                      | 177037        | 567         | 138        | -1238            | -1387 (-1544; -1126)               | 8    |
|              | **4       | 85121                 | 2034             | 300               | 2341                     | 314                      | 84200         | 458         | 113        | -401             | -510 (-652; -294)                  | 1    |
| 90 %         | 0.5       | 323719                | 6721             | 1655              | 13018                    | 1730                     | 314036        | 2576        | 628        | -626             | -1371 (-1998; -193)                | 3    |
|              | 1         | 333850                | 5901             | 994               | 7820                     | 1039                     | 329897        | 1547        | 376        | -1818            | -2245 (-2643; -1538)               | 14   |
|              | 1.5       | 278121                | 5244             | 750               | 5895                     | 784                      | 275937        | 1165        | 283        | -1649            | -1961 (-2274; -1430)               | 12   |
|              | 2         | 234430                | 4719             | 580               | 4562                     | 606                      | 233401        | 902         | 219        | -1479            | -1709 (-1969; -1291)               | 11   |
|              | 4         | 138062                | 3479             | 506               | 3948                     | 529                      | 136560        | 772         | 190        | -621             | -806 (-1043; -443)                 | 2    |
| *65 %        | 4         | 1325878               | 0                | 18003             | 139906                   | 18830                    | 1502617       | 27902       | 7212       | 53730            | 46006 (39177; 58470)               |      |

\*Baseline intervention; values reported as absolute gains and losses.

\*\*optimal intervention.

## C. Severe pandemic

### i. Epidemiology ( $R_0 = 1.4, 1.6, 1.8$ )

**Table S13: Severe pandemic influenza with  $R_0=1.4$ : number of avoided cases, GP-visits, hospitalizations, and deaths associated with each sick leave intervention, assuming 65% of children and 55% adults are symptomatic, and no extra mixing.**

| Intervention |            | Median (0.25; 0.75 percentiles) relative to baseline |                   |                         |                             |                        |                   |                | Mean workdays lost (proportion lost to caregiving) |
|--------------|------------|------------------------------------------------------|-------------------|-------------------------|-----------------------------|------------------------|-------------------|----------------|----------------------------------------------------|
| % on leave   | Delay time | Symptomatic cases avoided                            | % Reduction in AR | GP-visits avoided       | Hospital admissions avoided | ICU admissions avoided | Avoided Deaths    |                |                                                    |
| 65%          | 0.5        | 109164                                               | 10 %              | 21775 (19022; 24763)    | 2148 (1312; 3292)           | 364 (219; 565)         | 244 (128; 364)    | 2513155 (0.19) |                                                    |
|              | 1          | 47149                                                | 4 %               | 9405 (8216; 10695)      | 928 (567; 1422)             | 157 (95; 244)          | 105 (55; 157)     | 2516134 (0.19) |                                                    |
|              | 1.5        | 23671                                                | 2 %               | 4722 (4125; 5370)       | 466 (285; 714)              | 79 (47; 123)           | 53 (28; 79)       | 2431850 (0.2)  |                                                    |
|              | 2          | 7250                                                 | 1 %               | 1446 (1263; 1645)       | 143 (87; 219)               | 24 (15; 38)            | 16 (9; 24)        | 2365355 (0.21) |                                                    |
| 80%          | 0.5        | 176143                                               | 16 %              | 35135 (30693; 39957)    | 3466 (2118; 5312)           | 588 (353; 912)         | 394 (207; 587)    | 2774762 (0.16) |                                                    |
|              | 1          | 99304                                                | 9 %               | 19808 (17304; 22526)    | 1954 (1194; 2995)           | 331 (199; 514)         | 222 (117; 331)    | 2830265 (0.17) |                                                    |
|              | 1.5        | 70242                                                | 6 %               | 14011 (12240; 15934)    | 1382 (844; 2118)            | 234 (141; 364)         | 157 (82; 234)     | 2749505 (0.18) |                                                    |
|              | 2          | 49898                                                | 4 %               | 9953 (8695; 11319)      | 982 (600; 1505)             | 166 (100; 258)         | 112 (59; 166)     | 2682837 (0.18) |                                                    |
| 90%          | 4          | 40919                                                | 4 %               | 8162 (7130; 9282)       | 805 (492; 1234)             | 137 (82; 212)          | 92 (48; 136)      | 2521475 (0.19) |                                                    |
|              | 0.5        | 221326                                               | 20 %              | 44148 (38567; 50206)    | 4356 (2661; 6675)           | 738 (444; 1146)        | 495 (260; 738)    | 2908472 (0.15) |                                                    |
|              | 1          | 134589                                               | 12 %              | 26847 (23452; 30531)    | 2649 (1618; 4059)           | 449 (270; 697)         | 301 (158; 449)    | 3009492 (0.15) |                                                    |
|              | 1.5        | 101715                                               | 9 %               | 20289 (17724; 23073)    | 2002 (1223; 3068)           | 339 (204; 527)         | 228 (119; 339)    | 2936105 (0.16) |                                                    |
| *65%         | 2          | 78731                                                | 7 %               | 15705 (13719; 17860)    | 1549 (946; 2375)            | 263 (158; 408)         | 176 (92; 262)     | 2872533 (0.17) |                                                    |
|              | 4          | 68589                                                | 6 %               | 13682 (11952; 15559)    | 1350 (825; 2069)            | 229 (138; 355)         | 153 (80; 229)     | 2700135 (0.18) |                                                    |
| *65%         | 4          | 1125097                                              |                   | 224424 (196051; 255221) | 22142 (13526; 33933)        | 3754 (2257; 5828)      | 2517 (1320; 3751) | 2224431 (0.23) |                                                    |

\* This is the baseline intervention; values are reported in absolute terms, and not in terms of avoided cases.



**Table S14: Severe pandemic influenza with R<sub>0</sub>=1.6: number of avoided cases, GP-visits, hospitalizations, and deaths associated with each sick leave intervention, assuming 65% of children and 55% adults are symptomatic, and no extra mixing.**

| Intervention |            | Median (0.25; 0.75 percentiles) relative to baseline |                   |                         |                             |                        |                   | Mean workdays lost (proportion lost to caregiving) |
|--------------|------------|------------------------------------------------------|-------------------|-------------------------|-----------------------------|------------------------|-------------------|----------------------------------------------------|
| % on leave   | Delay time | Symptomatic cases avoided                            | % Reduction in AR | GP-visits avoided       | Hospital admissions avoided | ICU admissions avoided | Avoided Deaths    |                                                    |
| 65%          | 0.5        | 91511                                                | 6 %               | 18254 (15946; 20759)    | 1801 (1100; 2760)           | 305 (184; 474)         | 205 (107; 305)    | 3473683 (0.18)                                     |
|              | 1          | 39318                                                | 3 %               | 7843 (6851; 8919)       | 774 (473; 1186)             | 131 (79; 204)          | 88 (46; 131)      | 3396342 (0.19)                                     |
|              | 1.5        | 19698                                                | 1 %               | 3929 (3432; 4468)       | 388 (237; 594)              | 66 (40; 102)           | 44 (23; 66)       | 3253836 (0.2)                                      |
|              | 2          | 6028                                                 | 0 %               | 1202 (1050; 1367)       | 119 (72; 182)               | 20 (12; 31)            | 13 (7; 20)        | 3145766 (0.2)                                      |
| 80%          | 0.5        | 149846                                               | 10 %              | 29890 (26111; 33992)    | 2949 (1801; 4519)           | 500 (301; 776)         | 335 (176; 500)    | 3944807 (0.15)                                     |
|              | 1          | 84044                                                | 6 %               | 16764 (14645; 19065)    | 1654 (1010; 2535)           | 280 (169; 435)         | 188 (99; 280)     | 3899230 (0.16)                                     |
|              | 1.5        | 59422                                                | 4 %               | 11853 (10354; 13479)    | 1169 (714; 1792)            | 198 (119; 308)         | 133 (70; 198)     | 3745056 (0.17)                                     |
|              | 2          | 42244                                                | 3 %               | 8426 (7361; 9583)       | 831 (508; 1274)             | 141 (85; 219)          | 94 (50; 141)      | 3626016 (0.18)                                     |
| 90%          | 4          | 34695                                                | 2 %               | 6921 (6046; 7870)       | 683 (417; 1046)             | 116 (70; 180)          | 78 (41; 116)      | 3394926 (0.19)                                     |
|              | 0.5        | 189865                                               | 13 %              | 37873 (33084; 43070)    | 3737 (2283; 5726)           | 633 (381; 983)         | 425 (223; 633)    | 4219173 (0.14)                                     |
|              | 1          | 114653                                               | 8 %               | 22870 (19979; 26008)    | 2256 (1378; 3458)           | 383 (230; 594)         | 256 (135; 382)    | 4206202 (0.15)                                     |
|              | 1.5        | 86523                                                | 6 %               | 17259 (15077; 19627)    | 1703 (1040; 2610)           | 289 (174; 448)         | 194 (102; 288)    | 4049289 (0.15)                                     |
| *65%         | 2          | 66968                                                | 4 %               | 13358 (11669; 15191)    | 1318 (805; 2020)            | 223 (134; 347)         | 150 (79; 223)     | 3926006 (0.16)                                     |
|              | 4          | 58372                                                | 4 %               | 11644 (10171; 13241)    | 1149 (702; 1760)            | 195 (117; 302)         | 131 (68; 195)     | 3674334 (0.17)                                     |
| *65%         | 4          | 1492094                                              |                   | 297630 (260001; 338472) | 29364 (17938; 45001)        | 4978 (2994; 7729)      | 3338 (1751; 4975) | 2949228 (0.22)                                     |

\* This is the baseline intervention; values are reported in absolute terms, and not in terms of avoided cases.

**Table S15: Severe pandemic influenza with R<sub>0</sub>=1.8: number of avoided cases, GP-visits, hospitalizations, and deaths associated with each sick leave intervention, assuming 65% of children and 55% adults are symptomatic, and no extra mixing.**

| Intervention |            | Median (0.25; 0.75 percentiles) relative to baseline |                   |                         |                             |                        |                   | Mean workdays lost (proportion lost to caregiving) |
|--------------|------------|------------------------------------------------------|-------------------|-------------------------|-----------------------------|------------------------|-------------------|----------------------------------------------------|
| % on leave   | Delay time | Symptomatic cases avoided                            | % Reduction in AR | GP-visits avoided       | Hospital admissions avoided | ICU admissions avoided | Avoided Deaths    |                                                    |
| 65%          | 0.5        | 76740                                                | 4 %               | 15307 (13372; 17408)    | 1510 (923; 2314)            | 256 (154; 397)         | 172 (90; 256)     | 4175369 (0.17)                                     |
|              | 1          | 32850                                                | 2 %               | 6553 (5724; 7452)       | 646 (395; 991)              | 110 (66; 170)          | 73 (39; 110)      | 4035381 (0.18)                                     |
|              | 1.5        | 16437                                                | 1 %               | 3279 (2864; 3729)       | 323 (198; 496)              | 55 (33; 85)            | 37 (19; 55)       | 3848975 (0.19)                                     |
|              | 2          | 5025                                                 | 0 %               | 1002 (876; 1140)        | 99 (60; 152)                | 17 (10; 26)            | 11 (6; 17)        | 3709742 (0.2)                                      |
| 80%          | 0.5        | 126899                                               | 7 %               | 25313 (22112; 28786)    | 2497 (1526; 3827)           | 423 (255; 657)         | 284 (149; 423)    | 4808806 (0.15)                                     |
|              | 1          | 70896                                                | 4 %               | 14142 (12354; 16082)    | 1395 (852; 2138)            | 237 (142; 367)         | 159 (83; 236)     | 4681752 (0.16)                                     |
|              | 1.5        | 50097                                                | 3 %               | 9993 (8730; 11364)      | 986 (602; 1511)             | 167 (101; 259)         | 112 (59; 167)     | 4471240 (0.16)                                     |
|              | 2          | 35652                                                | 2 %               | 7112 (6212; 8087)       | 702 (429; 1075)             | 119 (72; 185)          | 80 (42; 119)      | 4312208 (0.17)                                     |
| 90%          | 4          | 29300                                                | 2 %               | 5845 (5106; 6647)       | 577 (352; 884)              | 98 (59; 152)           | 66 (34; 98)       | 4029275 (0.18)                                     |
|              | 0.5        | 161725                                               | 9 %               | 32259 (28181; 36686)    | 3183 (1944; 4878)           | 540 (324; 838)         | 362 (190; 539)    | 5194365 (0.14)                                     |
|              | 1          | 97147                                                | 6 %               | 19378 (16928; 22037)    | 1912 (1168; 2930)           | 324 (195; 503)         | 217 (114; 324)    | 5087174 (0.14)                                     |
|              | 1.5        | 73232                                                | 4 %               | 14608 (12761; 16612)    | 1441 (880; 2209)            | 244 (147; 379)         | 164 (86; 244)     | 4865326 (0.15)                                     |
| *65%         | 2          | 56670                                                | 3 %               | 11304 (9875; 12855)     | 1115 (681; 1709)            | 189 (114; 294)         | 127 (67; 189)     | 4696009 (0.16)                                     |
|              | 4          | 49402                                                | 3 %               | 9854 (8608; 11207)      | 972 (594; 1490)             | 165 (99; 256)          | 111 (58; 165)     | 4385034 (0.17)                                     |
| *65%         | 4          | 1758906                                              |                   | 350851 (306493; 398996) | 34615 (21145; 53048)        | 5868 (3529; 9111)      | 3934 (2064; 5864) | 3472152 (0.21)                                     |

\* This is the baseline intervention; values are reported in absolute terms, and not in terms of avoided cases.

**ii. Costs and effects (R<sub>0</sub> = 1.4, 1.6, 1.8)**

**Table S16: Severe pandemic influenza with R<sub>0</sub>=1.4: costs and benefits associated with each sick leave intervention relative to the baseline, assuming 65% of children and 55% of adults are symptomatic, and no extra mixing.**

| Intervention |           | Mean costs (1000 USD) |                  |                   |                          |                          | Mean benefits |             |            | Output measures  |                                    |      |
|--------------|-----------|-----------------------|------------------|-------------------|--------------------------|--------------------------|---------------|-------------|------------|------------------|------------------------------------|------|
| % on leave   | Max. days | Productivity losses   | Cost of campaign | GP-visits avoided | Hospitalisations avoided | Medication costs avoided | Total costs   | QALYs saved | YPLL saved | Mean NHB (QALYs) | Median NHB (0.25; 0.75 percentile) | Rank |
| 65 %         | 0.5       | 36979                 | 3228             | 1490              | 24870                    | 1222                     | 12624         | 1913        | 651        | 1784             | 1312 (866; 2106)                   | 4    |
|              | 1         | 78221                 | 2411             | 644               | 10742                    | 528                      | 68719         | 826         | 281        | 125              | -79 (-272; 264)                    | 12   |
|              | 1.5       | 62013                 | 1757             | 323               | 5393                     | 265                      | 57789         | 414         | 141        | -175             | -277 (-374; -105)                  | 13   |
|              | 2         | 47896                 | 1235             | 99                | 1652                     | 81                       | 47299         | 127         | 43         | -355             | -386 (-417; -333)                  | 14   |
| 80 %         | 0.5       | 18051                 | 5275             | 2405              | 40253                    | 1971                     | -21303        | 3139        | 1049       | 3356             | 2554 (1838; 3839)                  | 2    |
|              | 1         | 87452                 | 4455             | 1356              | 22693                    | 1111                     | 66746         | 1768        | 590        | 1087             | 639 (230; 1359)                    | 6    |
|              | 1.5       | 79022                 | 3799             | 959               | 16052                    | 786                      | 65024         | 1250        | 416        | 587              | 273 (-20; 782)                     | 10   |
|              | 2         | 69708                 | 3274             | 681               | 11403                    | 558                      | 60339         | 887         | 295        | 272              | 54 (-159; 415)                     | 11   |
|              | 4         | 20605                 | 2034             | 559               | 9322                     | 458                      | 12301         | 715         | 242        | 590              | 422 (243; 722)                     | 9    |
| 90 %         | **0.5     | -3261                 | 6720             | 3022              | 50578                    | 2477                     | -52618        | 3944        | 1318       | 4481             | 3479 (2570; 5087)                  | 1    |
|              | 1         | 86969                 | 5900             | 1838              | 30757                    | 1506                     | 58769         | 2396        | 799        | 1797             | 1194 (635; 2168)                   | 3    |
|              | 1.5       | 84832                 | 5244             | 1389              | 23244                    | 1138                     | 64304         | 1810        | 603        | 1154             | 705 (275; 1438)                    | 5    |
|              | 2         | 79388                 | 4719             | 1075              | 17992                    | 881                      | 64160         | 1400        | 466        | 746              | 403 (64; 974)                      | 8    |
|              | 4         | 30029                 | 3480             | 936               | 15626                    | 768                      | 16179         | 1199        | 406        | 1034             | 753 (453; 1254)                    | 7    |
| *65 %        | 4         | 849564                | 0                | 15361             | 256371                   | 12601                    | 1133896       | 19916       | 6917       | 38094            | 33367 (28728; 41449)               |      |

\*Baseline intervention; values reported as absolute gains and losses.

\*\*optimal intervention.

**Table S17: Severe pandemic influenza with R<sub>0</sub>=1.6: costs and benefits associated with each sick leave intervention relative to the baseline, assuming 65% of children and 55% of adults are symptomatic, and no extra mixing.**

| Intervention |           | Mean costs (1000 USD) |                  |                   |                          |                          | Mean benefits |             |            | Output measures  |                                    |      |
|--------------|-----------|-----------------------|------------------|-------------------|--------------------------|--------------------------|---------------|-------------|------------|------------------|------------------------------------|------|
| % on leave   | Max. days | Productivity losses   | Cost of campaign | GP-visits avoided | Hospitalisations avoided | Medication costs avoided | Total costs   | QALYs saved | YPLL saved | Mean NHB (QALYs) | Median NHB (0.25; 0.75 percentile) | Rank |
| 65 %         | 0.5       | 134406                | 3228             | 1249              | 20848                    | 1026                     | 114510        | 1594        | 534        | 426              | 30 (-345; 693)                     | 3    |
|              | 1         | 140533                | 2411             | 537               | 8957                     | 441                      | 133008        | 684         | 229        | -672             | -840 (-1002; -555)                 | 14   |
|              | 1.5       | 100505                | 1757             | 269               | 4488                     | 221                      | 97285         | 343         | 115        | -649             | -733 (-815; -590)                  | 13   |
|              | 2         | 69357                 | 1235             | 82                | 1373                     | 68                       | 69068         | 105         | 35         | -599             | -622 (-651; -578)                  | 12   |
| 80 %         | 0.5       | 166319                | 5275             | 2046              | 34243                    | 1680                     | 133624        | 2654        | 873        | 1291             | 612 (-4; 1702)                     | 2    |
|              | 1         | 195473                | 4455             | 1147              | 19206                    | 942                      | 178632        | 1487        | 489        | -334             | -710 (-1060; -101)                 | 8    |
|              | 1.5       | 159551                | 3799             | 811               | 13579                    | 666                      | 148293        | 1051        | 345        | -461             | -721 (-975; -291)                  | 10   |
|              | 2         | 130599                | 3274             | 577               | 9654                     | 474                      | 123169        | 747         | 245        | -509             | -688 (-875; -381)                  | 11   |
| 90 %         | 4         | 56873                 | 2034             | 474               | 7904                     | 389                      | 50140         | 602         | 201        | 91               | -42 (-206; 209)                    | 5    |
|              | **0.5     | 178280                | 6720             | 2592              | 43389                    | 2129                     | 136891        | 3362        | 1107       | 1966             | 1114 (329; 2486)                   | 1    |
|              | 1         | 225459                | 5900             | 1565              | 26201                    | 1286                     | 202307        | 2029        | 666        | -34              | -536 (-1026; 292)                  | 6    |
|              | 1.5       | 193502                | 5244             | 1181              | 19773                    | 970                      | 176822        | 1530        | 502        | -273             | -647 (-1022; -18)                  | 7    |
| *65 %        | 2         | 166691                | 4719             | 914               | 15304                    | 751                      | 154441        | 1184        | 388        | -391             | -670 (-974; -183)                  | 9    |
|              | 4         | 90609                 | 3480             | 797               | 13298                    | 654                      | 79339         | 1014        | 338        | 205              | -21 (-295; 403)                    | 4    |
| *65 %        | 4         | 1126228               | 0                | 20371             | 339996                   | 16741                    | 1503337       | 26343       | 9092       | 50532            | 44255 (38108; 54983)               |      |

\*Baseline intervention; values reported as absolute gains and losses.

\*\*optimal intervention.

**Table S18: Severe pandemic influenza with R<sub>0</sub>=1.8: costs and benefits associated with each sick leave intervention relative to the baseline, assuming 65% of children and 55% of adults are symptomatic, and no extra mixing.**

| Intervention |           | Mean costs (1000 USD) |                  |                   |                          |                          | Mean benefits |             |            | Output measures  |                                    |      |
|--------------|-----------|-----------------------|------------------|-------------------|--------------------------|--------------------------|---------------|-------------|------------|------------------|------------------------------------|------|
| % on leave   | Max. days | Productivity losses   | Cost of campaign | GP-visits avoided | Hospitalisations avoided | Medication costs avoided | Total costs   | QALYs saved | YPLL saved | Mean NHB (QALYs) | Median NHB (0.25; 0.75 percentile) | Rank |
| 65 %         | 0.5       | 209988                | 3228             | 1048              | 17483                    | 862                      | 193823        | 1330        | 441        | -647             | -979 (-1292; -418)                 | 5    |
|              | 1         | 187840                | 2411             | 448               | 7484                     | 369                      | 181949        | 569         | 188        | -1286            | -1426 (-1563; -1186)               | 9    |
|              | 1.5       | 129487                | 1757             | 224               | 3745                     | 185                      | 127091        | 285         | 94         | -1011            | -1079 (-1150; -959)                | 7    |
|              | 2         | 85330                 | 1235             | 69                | 1145                     | 56                       | 85294         | 87          | 29         | -783             | -801 (-827; -762)                  | 6    |
| 80 %         | 0.5       | 283659                | 5275             | 1733              | 28999                    | 1425                     | 256776        | 2236        | 727        | -382             | -957 (-1478; -36)                  | 3    |
|              | 1         | 279165                | 4455             | 968               | 16201                    | 796                      | 265654        | 1248        | 405        | -1461            | -1772 (-2075; -1261)               | 13   |
|              | 1.5       | 221657                | 3799             | 684               | 11448                    | 563                      | 212760        | 882         | 286        | -1288            | -1502 (-1722; -1139)               | 10   |
|              | 2         | 177355                | 3274             | 487               | 8147                     | 401                      | 171594        | 627         | 203        | -1123            | -1266 (-1435; -1007)               | 8    |
|              | **4       | 85161                 | 2034             | 400               | 6675                     | 329                      | 79791         | 506         | 166        | -307             | -414 (-563; -194)                  | 2    |
| 90 %         | 0.5       | 323676                | 6720             | 2208              | 36958                    | 1816                     | 289414        | 2850        | 926        | -101             | -816 (-1500; 348)                  | 1    |
|              | 1         | 333809                | 5900             | 1326              | 22200                    | 1091                     | 315091        | 1711        | 555        | -1503            | -1921 (-2344; -1217)               | 14   |
|              | 1.5       | 278079                | 5244             | 1000              | 16735                    | 823                      | 264765        | 1289        | 417        | -1411            | -1715 (-2049; -1184)               | 12   |
|              | 2         | 234388                | 4719             | 774               | 12950                    | 637                      | 224746        | 997         | 322        | -1295            | -1518 (-1796; -1102)               | 11   |
|              | 4         | 138129                | 3480             | 674               | 11255                    | 555                      | 129124        | 854         | 281        | -463             | -643 (-892; -275)                  | 4    |
| *65 %        | 4         | 1325894               | 0                | 24014             | 400794                   | 19768                    | 1770469       | 30986       | 10636      | 59545            | 52139 (44898; 64795)               |      |

\*Baseline intervention; values reported as absolute gains and losses.

\*\*optimal intervention.

## D. Very severe pandemic

### i. Epidemiology ( $R_0 = 1.4, 1.6, 1.8$ )

**Table S19: Very severe pandemic influenza with  $R_0=1.4$ : number of avoided cases, GP-visits, hospitalizations, and deaths associated with each sick leave intervention, assuming 65% of children and 55% adults are symptomatic, and no extra mixing.**

| Intervention |            | Median (0.25; 0.75 percentiles) relative to baseline |                   |                         |                             |                        |                    |                | Mean workdays lost (proportion lost to caregiving) |
|--------------|------------|------------------------------------------------------|-------------------|-------------------------|-----------------------------|------------------------|--------------------|----------------|----------------------------------------------------|
| % on leave   | Delay time | Symptomatic cases avoided                            | % Reduction in AR | GP-visits avoided       | Hospital admissions avoided | ICU admissions avoided | Avoided Deaths     |                |                                                    |
| 65%          | 0.5        | 109164                                               | 10 %              | 27237 (24244; 30447)    | 3785 (2640; 5241)           | 944 (648; 1325)        | 761 (399; 1133)    | 2513148 (0.19) |                                                    |
|              | 1          | 47149                                                | 4 %               | 11764 (10471; 13150)    | 1635 (1140; 2264)           | 408 (280; 572)         | 329 (172; 489)     | 2516126 (0.19) |                                                    |
|              | 1.5        | 23671                                                | 2 %               | 5906 (5257; 6602)       | 821 (572; 1136)             | 205 (141; 287)         | 165 (86; 246)      | 2431842 (0.2)  |                                                    |
|              | 2          | 7250                                                 | 1 %               | 1809 (1610; 2022)       | 251 (175; 348)              | 63 (43; 88)            | 51 (26; 75)        | 2365347 (0.21) |                                                    |
| 80%          | 0.5        | 176143                                               | 16 %              | 43949 (39119; 49129)    | 6107 (4259; 8457)           | 1522 (1046; 2138)      | 1228 (643; 1828)   | 2774755 (0.16) |                                                    |
|              | 1          | 99304                                                | 9 %               | 24777 (22054; 27697)    | 3443 (2401; 4768)           | 858 (590; 1205)        | 692 (363; 1030)    | 2830258 (0.17) |                                                    |
|              | 1.5        | 70242                                                | 6 %               | 17526 (15600; 19591)    | 2435 (1699; 3372)           | 607 (417; 852)         | 490 (256; 729)     | 2749498 (0.18) |                                                    |
|              | 2          | 49898                                                | 4 %               | 12450 (11082; 13917)    | 1730 (1207; 2396)           | 431 (296; 606)         | 348 (182; 518)     | 2682830 (0.18) |                                                    |
| 90%          | 4          | 40919                                                | 4 %               | 10210 (9087; 11413)     | 1419 (989; 1965)            | 354 (243; 497)         | 285 (149; 425)     | 2521468 (0.19) |                                                    |
|              | 0.5        | 221326                                               | 20 %              | 55222 (49153; 61731)    | 7673 (5352; 10626)          | 1913 (1314; 2686)      | 1543 (808; 2297)   | 2908465 (0.15) |                                                    |
|              | 1          | 134589                                               | 12 %              | 33581 (29890; 37539)    | 4666 (3255; 6462)           | 1163 (799; 1633)       | 938 (491; 1397)    | 3009486 (0.15) |                                                    |
|              | 1.5        | 101715                                               | 9 %               | 25378 (22589; 28370)    | 3526 (2460; 4883)           | 879 (604; 1234)        | 709 (371; 1055)    | 2936098 (0.16) |                                                    |
| *65%         | 2          | 78731                                                | 7 %               | 19644 (17485; 21959)    | 2730 (1904; 3780)           | 681 (467; 955)         | 549 (287; 817)     | 2872526 (0.17) |                                                    |
|              | 4          | 68589                                                | 6 %               | 17113 (15233; 19130)    | 2378 (1659; 3293)           | 593 (407; 832)         | 478 (250; 712)     | 2700128 (0.18) |                                                    |
| *65%         | 4          | 1125097                                              |                   | 280718 (249867; 313805) | 39006 (27206; 54017)        | 9725 (6680; 13653)     | 7844 (4108; 11675) | 2224423 (0.23) |                                                    |

\* This is the baseline intervention; values are reported in absolute terms, and not in terms of avoided cases.

**Table S20: Very severe pandemic influenza with R<sub>0</sub>=1.6: number of avoided cases, GP-visits, hospitalizations, and deaths associated with each sick leave intervention, assuming 65% of children and 55% adults are symptomatic, and no extra mixing.**

| Intervention |            | Median (0.25; 0.75 percentiles) relative to baseline |                   |                         |                             |                        |                     |                | Mean workdays lost (proportion lost to caregiving) |
|--------------|------------|------------------------------------------------------|-------------------|-------------------------|-----------------------------|------------------------|---------------------|----------------|----------------------------------------------------|
| % on leave   | Delay time | Symptomatic cases avoided                            | % Reduction in AR | GP-visits avoided       | Hospital admissions avoided | ICU admissions avoided | Avoided Deaths      |                |                                                    |
| 65%          | 0.5        | 91511                                                | 6 %               | 22832 (20323; 25524)    | 3173 (2213; 4393)           | 791 (543; 1111)        | 638 (334; 950)      | 3473673 (0.18) |                                                    |
|              | 1          | 39318                                                | 3 %               | 9810 (8732; 10966)      | 1363 (951; 1888)            | 340 (233; 477)         | 274 (144; 408)      | 3396333 (0.19) |                                                    |
|              | 1.5        | 19698                                                | 1 %               | 4915 (4375; 5494)       | 683 (476; 946)              | 170 (117; 239)         | 137 (72; 204)       | 3253826 (0.2)  |                                                    |
|              | 2          | 6028                                                 | 0 %               | 1504 (1339; 1681)       | 209 (146; 289)              | 52 (36; 73)            | 42 (22; 63)         | 3145756 (0.2)  |                                                    |
| 80%          | 0.5        | 149846                                               | 10 %              | 37387 (33279; 41794)    | 5195 (3623; 7194)           | 1295 (890; 1818)       | 1045 (547; 1555)    | 3944798 (0.15) |                                                    |
|              | 1          | 84044                                                | 6 %               | 20969 (18665; 23441)    | 2914 (2032; 4035)           | 726 (499; 1020)        | 586 (307; 872)      | 3899221 (0.16) |                                                    |
|              | 1.5        | 59422                                                | 4 %               | 14826 (13197; 16574)    | 2060 (1437; 2853)           | 514 (353; 721)         | 414 (217; 617)      | 3745047 (0.17) |                                                    |
|              | 2          | 42244                                                | 3 %               | 10540 (9382; 11782)     | 1465 (1022; 2028)           | 365 (251; 513)         | 295 (154; 438)      | 3626007 (0.18) |                                                    |
| 90%          | 4          | 34695                                                | 2 %               | 8657 (7705; 9677)       | 1203 (839; 1666)            | 300 (206; 421)         | 242 (127; 360)      | 3394917 (0.19) |                                                    |
|              | 0.5        | 189865                                               | 13 %              | 47372 (42166; 52956)    | 6582 (4591; 9116)           | 1641 (1127; 2304)      | 1324 (693; 1970)    | 4219164 (0.14) |                                                    |
|              | 1          | 114653                                               | 8 %               | 28607 (25463; 31978)    | 3975 (2772; 5505)           | 991 (681; 1391)        | 799 (419; 1190)     | 4206193 (0.15) |                                                    |
|              | 1.5        | 86523                                                | 6 %               | 21588 (19215; 24132)    | 3000 (2092; 4154)           | 748 (514; 1050)        | 603 (316; 898)      | 4049280 (0.15) |                                                    |
| *65%         | 2          | 66968                                                | 4 %               | 16709 (14873; 18678)    | 2322 (1619; 3215)           | 579 (398; 813)         | 467 (245; 695)      | 3925997 (0.16) |                                                    |
|              | 4          | 58372                                                | 4 %               | 14564 (12964; 16281)    | 2024 (1412; 2802)           | 505 (347; 708)         | 407 (213; 606)      | 3674324 (0.17) |                                                    |
|              | 4          | 1492094                                              |                   | 372285 (331371; 416165) | 51730 (36081; 71636)        | 12897 (8859; 18107)    | 10402 (5448; 15483) | 2949219 (0.22) |                                                    |

\* This is the baseline intervention; values are reported in absolute terms, and not in terms of avoided cases.

**Table S21: Very severe pandemic influenza with R<sub>0</sub>=1.8: number of avoided cases, GP-visits, hospitalizations, and deaths associated with each sick leave intervention, assuming 65% of children and 55% adults are symptomatic, and no extra mixing.**

| Intervention |            | Median (0.25; 0.75 percentiles) relative to baseline |                   |                         |                             |                        |                     |                | Mean workdays lost (proportion lost to caregiving) |
|--------------|------------|------------------------------------------------------|-------------------|-------------------------|-----------------------------|------------------------|---------------------|----------------|----------------------------------------------------|
| % on leave   | Delay time | Symptomatic cases avoided                            | % Reduction in AR | GP-visits avoided       | Hospital admissions avoided | ICU admissions avoided | Avoided Deaths      |                |                                                    |
| 65%          | 0.5        | 76740                                                | 4 %               | 19147 (17043; 21404)    | 2661 (1856; 3684)           | 663 (456; 931)         | 535 (280; 796)      | 4175358 (0.17) |                                                    |
|              | 1          | 32850                                                | 2 %               | 8196 (7295; 9162)       | 1139 (794; 1577)            | 284 (195; 399)         | 229 (120; 341)      | 4035370 (0.18) |                                                    |
|              | 1.5        | 16437                                                | 1 %               | 4101 (3650; 4585)       | 570 (397; 789)              | 142 (98; 199)          | 115 (60; 171)       | 3848964 (0.19) |                                                    |
|              | 2          | 5025                                                 | 0 %               | 1254 (1116; 1402)       | 174 (122; 241)              | 43 (30; 61)            | 35 (18; 52)         | 3709731 (0.2)  |                                                    |
| 80%          | 0.5        | 126899                                               | 7 %               | 31662 (28182; 35394)    | 4400 (3069; 6092)           | 1097 (753; 1540)       | 885 (463; 1317)     | 4808796 (0.15) |                                                    |
|              | 1          | 70896                                                | 4 %               | 17689 (15745; 19774)    | 2458 (1714; 3404)           | 613 (421; 860)         | 494 (259; 736)      | 4681741 (0.16) |                                                    |
|              | 1.5        | 50097                                                | 3 %               | 12499 (11126; 13973)    | 1737 (1211; 2405)           | 433 (297; 608)         | 349 (183; 520)      | 4471229 (0.16) |                                                    |
|              | 2          | 35652                                                | 2 %               | 8895 (7918; 9944)       | 1236 (862; 1712)            | 308 (212; 433)         | 249 (130; 370)      | 4312197 (0.17) |                                                    |
|              | 4          | 29300                                                | 2 %               | 7311 (6507; 8172)       | 1016 (709; 1407)            | 253 (174; 356)         | 204 (107; 304)      | 4029264 (0.18) |                                                    |
| 90%          | 0.5        | 161725                                               | 9 %               | 40351 (35917; 45107)    | 5607 (3911; 7765)           | 1398 (960; 1963)       | 1127 (591; 1678)    | 5194354 (0.14) |                                                    |
|              | 1          | 97147                                                | 6 %               | 24239 (21575; 27096)    | 3368 (2349; 4664)           | 840 (577; 1179)        | 677 (355; 1008)     | 5087163 (0.14) |                                                    |
|              | 1.5        | 73232                                                | 4 %               | 18272 (16264; 20425)    | 2539 (1771; 3516)           | 633 (435; 889)         | 511 (267; 760)      | 4865315 (0.15) |                                                    |
|              | 2          | 56670                                                | 3 %               | 14139 (12586; 15806)    | 1965 (1370; 2721)           | 490 (336; 688)         | 395 (207; 588)      | 4695998 (0.16) |                                                    |
|              | 4          | 49402                                                | 3 %               | 12326 (10971; 13779)    | 1713 (1195; 2372)           | 427 (293; 600)         | 344 (180; 513)      | 4385023 (0.17) |                                                    |
| *65%         | 4          | 1758906                                              |                   | 438856 (390626; 490583) | 60980 (42533; 84446)        | 15203 (10443; 21345)   | 12262 (6423; 18252) | 3472141 (0.21) |                                                    |

\* This is the baseline intervention; values are reported in absolute terms, and not in terms of avoided cases.



**ii. Costs and effects (R<sub>0</sub> = 1.4, 1.6, 1.8)**

**Table S22: Very severe pandemic influenza with R<sub>0</sub>=1.4: costs and benefits associated with each sick leave intervention relative to the baseline, assuming 65% of children and 55% of adults are symptomatic, and no extra mixing.**

|            |           | Mean costs (1000 USD) |                  |                   |                          |                          | Mean benefits |             |            | Output measures  |                                    |      |
|------------|-----------|-----------------------|------------------|-------------------|--------------------------|--------------------------|---------------|-------------|------------|------------------|------------------------------------|------|
| % on leave | Max. days | Productivity losses   | Cost of campaign | GP-visits avoided | Hospitalisations avoided | Medication costs avoided | Total costs   | QALYs saved | YPLL saved | Mean NHB (QALYs) | Median NHB (0.25; 0.75 percentile) | Rank |
| 65 %       | 0.5       | 36980                 | 3226             | 1863              | 46903                    | 1280                     | -9840         | 3055        | 2028       | 3155             | 2757 (2186; 3598)                  | 4    |
|            | 1         | 78230                 | 2409             | 805               | 20258                    | 553                      | 59024         | 1318        | 875        | 716              | 546 (296; 909)                     | 12   |
|            | 1.5       | 62021                 | 1756             | 404               | 10170                    | 277                      | 52925         | 662         | 439        | 122              | 37 (-89; 218)                      | 13   |
|            | 2         | 47903                 | 1234             | 124               | 3115                     | 85                       | 45813         | 202         | 134        | -265             | -290 (-330; -234)                  | 14   |
| 80 %       | 0.5       | 18054                 | 5277             | 3007              | 75685                    | 2065                     | -57425        | 4979        | 3268       | 5565             | 4889 (3986; 6256)                  | 2    |
|            | 1         | 87457                 | 4456             | 1695              | 42669                    | 1164                     | 46386         | 2803        | 1837       | 2329             | 1953 (1435; 2724)                  | 6    |
|            | 1.5       | 79029                 | 3799             | 1199              | 30181                    | 823                      | 50625         | 1980        | 1297       | 1464             | 1200 (830; 1743)                   | 9    |
|            | 2         | 69716                 | 3274             | 852               | 21440                    | 585                      | 50113         | 1405        | 920        | 894              | 707 (439; 1096)                    | 11   |
|            | 4         | 20557                 | 2033             | 698               | 17581                    | 480                      | 3831          | 1139        | 753        | 1100             | 956 (733; 1280)                    | 10   |
| 90 %       | **0.5     | -3252                 | 6722             | 3778              | 95099                    | 2594                     | -98001        | 6257        | 4107       | 7256             | 6411 (5269; 8130)                  | 1    |
|            | 1         | 86982                 | 5901             | 2297              | 57830                    | 1577                     | 31178         | 3798        | 2490       | 3480             | 2972 (2266; 4015)                  | 3    |
|            | 1.5       | 84845                 | 5244             | 1736              | 43705                    | 1192                     | 43456         | 2868        | 1878       | 2424             | 2040 (1500; 2831)                  | 5    |
|            | 2         | 79403                 | 4718             | 1344              | 33829                    | 923                      | 48026         | 2217        | 1451       | 1728             | 1432 (1011; 2045)                  | 8    |
|            | 4         | 29951                 | 3477             | 1171              | 29470                    | 804                      | 1984          | 1910        | 1263       | 1890             | 1648 (1275; 2188)                  | 7    |
| *65 %      | 4         | 849562                | 0                | 19205             | 480727                   | 13196                    | 1362690       | 32010       | 21549      | 52521            | 48597 (42719; 57176)               |      |

\*Baseline intervention; values reported as absolute gains and losses.

\*\*optimal intervention.

**Table S23: Very severe pandemic influenza with R<sub>0</sub>=1.6: costs and benefits associated with each sick leave intervention relative to the baseline, assuming 65% of children and 55% of adults are symptomatic, and no extra mixing.**

| Intervention |           | Mean costs (1000 USD) |                  |                   |                          |                          | Mean benefits |             |            | Output measures  |                                    |      |
|--------------|-----------|-----------------------|------------------|-------------------|--------------------------|--------------------------|---------------|-------------|------------|------------------|------------------------------------|------|
| % on leave   | Max. days | Productivity losses   | Cost of campaign | GP-visits avoided | Hospitalisations avoided | Medication costs avoided | Total costs   | QALYs saved | YPLL saved | Mean NHB (QALYs) | Median NHB (0.25; 0.75 percentile) | Rank |
| 65 %         | 0.5       | 134422                | 3226             | 1562              | 39318                    | 1075                     | 95693         | 2531        | 1665       | 1555             | 1220 (741; 1924)                   | 3    |
|              | 1         | 140551                | 2409             | 671               | 16893                    | 462                      | 124935        | 1087        | 715        | -187             | -328 (-537; -27)                   | 12   |
|              | 1.5       | 100519                | 1756             | 336               | 8463                     | 231                      | 93244         | 544         | 358        | -407             | -476 (-582; -325)                  | 13   |
|              | 2         | 69366                 | 1234             | 103               | 2590                     | 71                       | 67837         | 167         | 110        | -525             | -545 (-580; -498)                  | 14   |
| 80 %         | 0.5       | 166326                | 5277             | 2558              | 64385                    | 1759                     | 102901        | 4185        | 2721       | 3136             | 2561 (1793; 3718)                  | 2    |
|              | 1         | 195483                | 4456             | 1435              | 36112                    | 987                      | 161406        | 2344        | 1522       | 698              | 380 (-59; 1029)                    | 7    |
|              | 1.5       | 159562                | 3799             | 1014              | 25532                    | 698                      | 136117        | 1655        | 1074       | 267              | 43 (-273; 504)                     | 10   |
|              | 2         | 130611                | 3274             | 721               | 18151                    | 496                      | 114517        | 1175        | 762        | 8                | -150 (-379; 181)                   | 11   |
| 90 %         | 4         | 56813                 | 2033             | 592               | 14907                    | 407                      | 42939         | 954         | 625        | 516              | 400 (201; 676)                     | 8    |
|              | **0.5     | 178298                | 6722             | 3241              | 81581                    | 2229                     | 97969         | 5302        | 3447       | 4303             | 3582 (2595; 5050)                  | 1    |
|              | 1         | 225478                | 5901             | 1957              | 49264                    | 1346                     | 178812        | 3196        | 2076       | 1373             | 941 (329; 1830)                    | 4    |
|              | 1.5       | 193523                | 5244             | 1477              | 37177                    | 1016                     | 159097        | 2410        | 1564       | 787              | 464 (-1; 1139)                     | 6    |
| *65 %        | 2         | 166712                | 4718             | 1143              | 28775                    | 786                      | 140726        | 1863        | 1208       | 428              | 184 (-189; 704)                    | 9    |
|              | 4         | 90510                 | 3477             | 996               | 25080                    | 685                      | 67226         | 1606        | 1052       | 920              | 724 (389; 1188)                    | 5    |
| *65 %        | 4         | 1126220               | 0                | 25469             | 637537                   | 17532                    | 1806758       | 42237       | 28324      | 69519            | 64295 (56519; 75690)               |      |

\*Baseline intervention; values reported as absolute gains and losses.

\*\*optimal intervention.

**Table S24: Very severe pandemic influenza with R<sub>0</sub>=1.8: costs and benefits associated with each sick leave intervention relative to the baseline, assuming 65% of children and 55% of adults are symptomatic, and no extra mixing.**

| Intervention |           | Mean costs (1000 USD) |                  |                   |                          |                          | Mean benefits |             |            | Output measures  |                                    |      |
|--------------|-----------|-----------------------|------------------|-------------------|--------------------------|--------------------------|---------------|-------------|------------|------------------|------------------------------------|------|
| % on leave   | Max. days | Productivity losses   | Cost of campaign | GP-visits avoided | Hospitalisations avoided | Medication costs avoided | Total costs   | QALYs saved | YPLL saved | Mean NHB (QALYs) | Median NHB (0.25; 0.75 percentile) | Rank |
| 65 %         | 0.5       | 210016                | 3226             | 1310              | 32972                    | 903                      | 178057        | 2102        | 1373       | 286              | 8 (-395; 595)                      | 3    |
|              | 1         | 187865                | 2409             | 561               | 14114                    | 386                      | 175213        | 899         | 587        | -888             | -1004 (-1180; -751)                | 14   |
|              | 1.5       | 129505                | 1756             | 281               | 7062                     | 193                      | 123725        | 450         | 294        | -812             | -869 (-959; -742)                  | 13   |
|              | 2         | 85342                 | 1234             | 86                | 2159                     | 59                       | 84272         | 138         | 90         | -722             | -737 (-768; -697)                  | 12   |
| 80 %         | 0.5       | 283669                | 5277             | 2166              | 54526                    | 1493                     | 230762        | 3510        | 2265       | 1157             | 669 (17; 1649)                     | 2    |
|              | 1         | 279177                | 4456             | 1210              | 30462                    | 834                      | 251126        | 1958        | 1262       | -603             | -872 (-1247; -322)                 | 8    |
|              | 1.5       | 221670                | 3799             | 855               | 21526                    | 589                      | 202500        | 1382        | 890        | -683             | -870 (-1140; -479)                 | 10   |
|              | 2         | 177370                | 3274             | 609               | 15319                    | 419                      | 164297        | 982         | 632        | -693             | -821 (-1024; -539)                 | 11   |
| 90 %         | 4         | 85093                 | 2033             | 500               | 12589                    | 345                      | 73692         | 798         | 519        | 46               | -47 (-226; 190)                    | 5    |
|              | **0.5     | 323700                | 6722             | 2761              | 69490                    | 1902                     | 256269        | 4472        | 2885       | 1859             | 1246 (396; 2499)                   | 1    |
|              | 1         | 333833                | 5901             | 1658              | 41742                    | 1143                     | 295191        | 2682        | 1728       | -328             | -694 (-1213; 65)                   | 6    |
|              | 1.5       | 278105                | 5244             | 1250              | 31466                    | 862                      | 249771        | 2020        | 1300       | -527             | -793 (-1203; -223)                 | 7    |
| *65 %        | 2         | 234414                | 4718             | 967               | 24350                    | 667                      | 213148        | 1562        | 1005       | -612             | -812 (-1142; -363)                 | 9    |
|              | 4         | 138015                | 3477             | 843               | 21226                    | 581                      | 118842        | 1346        | 875        | 134              | -25 (-325; 374)                    | 4    |
| *65 %        | 4         | 1325880               | 0                | 30024             | 751539                   | 20701                    | 2128143       | 49577       | 33136      | 81783            | 75612 (66466; 89011)               |      |

\*Baseline intervention; values reported as absolute gains and losses.

\*\*optimal intervention.

Section II: Scenarios with high symptomatic proportion (65% children, and 55% adults assumed to be symptomatic), with extra mixing

## A. Seasonal influenza

### i. Epidemiology ( $R_{eff} = 1.2, 1.3, 1.4$ )

**Table S25: Seasonal influenza with  $R_{eff}=1.2$ : number of avoided cases, GP-visits, hospitalizations, and deaths associated with each sick leave intervention, assuming 65% of children and 55% adults are symptomatic, and with extra mixing.**

| Intervention |            |                           |                   | Median (0.25; 0.75 percentiles) relative to baseline |                             |                        |                 |                                               | Mean |
|--------------|------------|---------------------------|-------------------|------------------------------------------------------|-----------------------------|------------------------|-----------------|-----------------------------------------------|------|
| % on leave   | Delay time | Symptomatic cases avoided | % Reduction in AR | GP-visits avoided                                    | Hospital admissions avoided | ICU admissions avoided | Avoided Deaths  | workdays lost (proportion lost to caregiving) |      |
| 65%          | 0.5        | 71294                     | 16 %              | 10657 (9068; 12415)                                  | 513 (216; 1011)             | 51 (21; 102)           | 108 (57; 161)   | 638913 (0.35)                                 |      |
|              | 1          | 31213                     | 7 %               | 4666 (3970; 5435)                                    | 225 (95; 443)               | 22 (9; 45)             | 47 (25; 71)     | 649335 (0.37)                                 |      |
|              | 1.5        | 15754                     | 3 %               | 2355 (2004; 2743)                                    | 113 (48; 223)               | 11 (5; 23)             | 24 (13; 36)     | 621482 (0.4)                                  |      |
|              | 2          | 4829                      | 1 %               | 722 (614; 841)                                       | 35 (15; 68)                 | 3 (1; 7)               | 7 (4; 11)       | 598475 (0.42)                                 |      |
| 80%          | 0.5        | 105817                    | 23 %              | 15817 (13459; 18427)                                 | 762 (321; 1501)             | 76 (31; 152)           | 160 (84; 239)   | 667907 (0.31)                                 |      |
|              | 1          | 58665                     | 13 %              | 8769 (7462; 10216)                                   | 423 (178; 832)              | 42 (17; 84)            | 89 (47; 133)    | 695081 (0.33)                                 |      |
|              | 1.5        | 40361                     | 9 %               | 6033 (5134; 7028)                                    | 291 (122; 572)              | 29 (12; 58)            | 61 (32; 91)     | 668195 (0.35)                                 |      |
|              | 2          | 27432                     | 6 %               | 4100 (3489; 4777)                                    | 198 (83; 389)               | 20 (8; 39)             | 42 (22; 62)     | 644651 (0.38)                                 |      |
| 90%          | 4          | 21694                     | 5 %               | 3243 (2759; 3778)                                    | 156 (66; 308)               | 15 (6; 31)             | 33 (17; 49)     | 585898 (0.42)                                 |      |
|              | 0.5        | 128267                    | 28 %              | 19173 (16315; 22336)                                 | 924 (389; 1819)             | 92 (38; 184)           | 195 (102; 290)  | 677796 (0.29)                                 |      |
|              | 1          | 76687                     | 17 %              | 11463 (9754; 13354)                                  | 552 (233; 1088)             | 55 (23; 110)           | 116 (61; 173)   | 718493 (0.31)                                 |      |
|              | 1.5        | 56592                     | 12 %              | 8459 (7198; 9855)                                    | 408 (172; 803)              | 40 (17; 81)            | 86 (45; 128)    | 693566 (0.33)                                 |      |
| *65%         | 2          | 42355                     | 9 %               | 6331 (5387; 7376)                                    | 305 (128; 601)              | 30 (12; 61)            | 64 (34; 96)     | 670606 (0.35)                                 |      |
|              | 4          | 36020                     | 8 %               | 5384 (4581; 6273)                                    | 259 (109; 511)              | 26 (11; 52)            | 55 (29; 81)     | 608001 (0.39)                                 |      |
| *65%         | 4          | 456443                    |                   | 68227 (58056; 79485)                                 | 3288 (1384; 6474)           | 326 (134; 654)         | 692 (363; 1032) | 546922 (0.46)                                 |      |

\* This is the baseline intervention; values are reported in absolute terms, and not in terms of avoided cases.

**Table S26: Seasonal influenza with R\_eff=1.3: number of avoided cases, GP-visits, hospitalizations, and deaths associated with each sick leave intervention, assuming 65% of children and 55% adults are symptomatic, and with extra mixing.**

| Intervention |            | Median (0.25; 0.75 percentiles) relative to baseline |                   |                        |                             |                        |                  | Mean workdays lost (proportion lost to caregiving) |
|--------------|------------|------------------------------------------------------|-------------------|------------------------|-----------------------------|------------------------|------------------|----------------------------------------------------|
| % on leave   | Delay time | Symptomatic cases avoided                            | % Reduction in AR | GP-visits avoided      | Hospital admissions avoided | ICU admissions avoided | Avoided Deaths   |                                                    |
| 65%          | 0.5        | 67060                                                | 10 %              | 10024 (8530; 11678)    | 483 (203; 951)              | 48 (20; 96)            | 102 (53; 152)    | 1005905 (0.34)                                     |
|              | 1          | 29264                                                | 4 %               | 4374 (3722; 5096)      | 211 (89; 415)               | 21 (9; 42)             | 44 (23; 66)      | 982392 (0.36)                                      |
|              | 1.5        | 14755                                                | 2 %               | 2206 (1877; 2569)      | 106 (45; 209)               | 11 (4; 21)             | 22 (12; 33)      | 926555 (0.39)                                      |
|              | 2          | 4538                                                 | 1 %               | 678 (577; 790)         | 33 (14; 64)                 | 3 (1; 7)               | 7 (4; 10)        | 883268 (0.41)                                      |
| 80%          | 0.5        | 101309                                               | 15 %              | 15143 (12886; 17642)   | 730 (307; 1437)             | 72 (30; 145)           | 154 (81; 229)    | 1092363 (0.3)                                      |
|              | 1          | 56147                                                | 8 %               | 8393 (7142; 9777)      | 404 (170; 796)              | 40 (17; 81)            | 85 (45; 127)     | 1079587 (0.32)                                     |
|              | 1.5        | 38731                                                | 6 %               | 5789 (4926; 6745)      | 279 (117; 549)              | 28 (11; 56)            | 59 (31; 88)      | 1018827 (0.34)                                     |
|              | 2          | 26478                                                | 4 %               | 3958 (3368; 4611)      | 191 (80; 376)               | 19 (8; 38)             | 40 (21; 60)      | 970668 (0.37)                                      |
| 90%          | 4          | 21048                                                | 3 %               | 3146 (2677; 3665)      | 152 (64; 299)               | 15 (6; 30)             | 32 (17; 48)      | 876239 (0.41)                                      |
|              | 0.5        | 123878                                               | 18 %              | 18517 (15756; 21572)   | 892 (376; 1757)             | 88 (36; 178)           | 188 (99; 280)    | 1139258 (0.28)                                     |
|              | 1          | 73971                                                | 11 %              | 11057 (9409; 12881)    | 533 (224; 1049)             | 53 (22; 106)           | 112 (59; 167)    | 1136626 (0.3)                                      |
|              | 1.5        | 54701                                                | 8 %               | 8177 (6958; 9526)      | 394 (166; 776)              | 39 (16; 78)            | 83 (44; 124)     | 1074089 (0.32)                                     |
| *65%         | 2          | 41086                                                | 6 %               | 6141 (5226; 7155)      | 296 (125; 583)              | 29 (12; 59)            | 62 (33; 93)      | 1023763 (0.34)                                     |
|              | 4          | 35051                                                | 5 %               | 5239 (4458; 6104)      | 252 (106; 497)              | 25 (10; 50)            | 53 (28; 79)      | 921201 (0.38)                                      |
|              |            | 673222                                               |                   | 100631 (85629; 117235) | 4849 (2041; 9549)           | 481 (198; 965)         | 1021 (535; 1522) | 802573 (0.45)                                      |

\* This is the baseline intervention; values are reported in absolute terms, and not in terms of avoided cases.

**Table S27: Seasonal influenza with R\_eff=1.4: number of avoided cases, GP-visits, hospitalizations, and deaths associated with each sick leave intervention, assuming 65% of children and 55% adults are symptomatic, and with extra mixing.**

| Intervention |            | Median (0.25; 0.75 percentiles) relative to baseline |                   |                         |                             |                        |                  |                | Mean workdays lost (proportion lost to caregiving) |
|--------------|------------|------------------------------------------------------|-------------------|-------------------------|-----------------------------|------------------------|------------------|----------------|----------------------------------------------------|
| % on leave   | Delay time | Symptomatic cases avoided                            | % Reduction in AR | GP-visits avoided       | Hospital admissions avoided | ICU admissions avoided | Avoided Deaths   |                |                                                    |
| 65%          | 0.5        | 62521                                                | 7 %               | 9345 (7952; 10887)      | 450 (190; 887)              | 45 (18; 90)            | 95 (50; 141)     | 1315011 (0.33) |                                                    |
|              | 1          | 27189                                                | 3 %               | 4064 (3458; 4735)       | 196 (82; 386)               | 19 (8; 39)             | 41 (22; 61)      | 1261461 (0.35) |                                                    |
|              | 1.5        | 13695                                                | 2 %               | 2047 (1742; 2385)       | 99 (42; 194)                | 10 (4; 20)             | 21 (11; 31)      | 1181272 (0.38) |                                                    |
|              | 2          | 4198                                                 | 0 %               | 628 (534; 731)          | 30 (13; 60)                 | 3 (1; 6)               | 6 (3; 9)         | 1120465 (0.4)  |                                                    |
| 80%          | 0.5        | 95720                                                | 11 %              | 14308 (12175; 16669)    | 689 (290; 1358)             | 68 (28; 137)           | 145 (76; 216)    | 1452959 (0.29) |                                                    |
|              | 1          | 52978                                                | 6 %               | 7919 (6738; 9226)       | 382 (161; 751)              | 38 (16; 76)            | 80 (42; 120)     | 1404068 (0.31) |                                                    |
|              | 1.5        | 36611                                                | 4 %               | 5472 (4657; 6375)       | 264 (111; 519)              | 26 (11; 52)            | 56 (29; 83)      | 1313546 (0.34) |                                                    |
|              | 2          | 25118                                                | 3 %               | 3755 (3195; 4374)       | 181 (76; 356)               | 18 (7; 36)             | 38 (20; 57)      | 1243902 (0.36) |                                                    |
| 90%          | 4          | 20032                                                | 2 %               | 2994 (2548; 3488)       | 144 (61; 284)               | 14 (6; 29)             | 30 (16; 45)      | 1118640 (0.4)  |                                                    |
|              | 0.5        | 117838                                               | 14 %              | 17614 (14988; 20520)    | 849 (357; 1671)             | 84 (35; 169)           | 179 (94; 266)    | 1533426 (0.27) |                                                    |
|              | 1          | 70231                                                | 8 %               | 10498 (8933; 12230)     | 506 (213; 996)              | 50 (21; 101)           | 107 (56; 159)    | 1491065 (0.29) |                                                    |
|              | 1.5        | 51971                                                | 6 %               | 7768 (6610; 9050)       | 374 (158; 737)              | 37 (15; 75)            | 79 (41; 117)     | 1395318 (0.31) |                                                    |
| *65%         | 2          | 39141                                                | 5 %               | 5851 (4978; 6816)       | 282 (119; 555)              | 28 (12; 56)            | 59 (31; 88)      | 1320905 (0.33) |                                                    |
|              | 4          | 33444                                                | 4 %               | 4999 (4254; 5824)       | 241 (101; 474)              | 24 (10; 48)            | 51 (27; 76)      | 1183713 (0.37) |                                                    |
| *65%         | 4          | 855061                                               |                   | 127811 (108758; 148901) | 6159 (2593; 12128)          | 610 (251; 1226)        | 1297 (680; 1933) | 1014696 (0.45) |                                                    |

\* This is the baseline intervention; values are reported in absolute terms, and not in terms of avoided cases.

**ii. Costs and effects (R\_eff = 1.2, 1.3, 1.4)**

**Table S28: Seasonal influenza with R\_eff=1.2: costs and benefits associated with each sick leave intervention relative to the baseline, assuming 65% of children and 55% of adults are symptomatic, and with extra mixing.**

| Intervention |           | Mean costs (1000 USD) |                  |                   |                          |                          | Mean benefits |             |            | Output measures  |                                    |      |
|--------------|-----------|-----------------------|------------------|-------------------|--------------------------|--------------------------|---------------|-------------|------------|------------------|------------------------------------|------|
| % on leave   | Max. days | Productivity losses   | Cost of campaign | GP-visits avoided | Hospitalisations avoided | Medication costs avoided | Total costs   | QALYs saved | YPLL saved | Mean NHB (QALYs) | Median NHB (0.25; 0.75 percentile) | Rank |
| 65 %         | 0.5       | 14412                 | 3227             | 730               | 5697                     | 757                      | 10455         | 1110        | 277        | 1004             | 688 (411; 1195)                    | 4    |
|              | 1         | 29471                 | 2411             | 319               | 2494                     | 332                      | 28736         | 486         | 121        | 193              | 54 (-66; 276)                      | 12   |
|              | 1.5       | 23405                 | 1757             | 161               | 1259                     | 167                      | 23574         | 245         | 61         | 5                | -65 (-126; 47)                     | 13   |
|              | 2         | 17892                 | 1234             | 49                | 386                      | 51                       | 18640         | 75          | 19         | -115             | -136 (-155; -102)                  | 14   |
| 80 %         | 0.5       | 1135                  | 5276             | 1083              | 8518                     | 1124                     | -4314         | 1677        | 410        | 1721             | 1224 (824; 1991)                   | 2    |
|              | 1         | 24260                 | 4456             | 600               | 4722                     | 623                      | 22770         | 930         | 228        | 698              | 422 (200; 849)                     | 6    |
|              | 1.5       | 20476                 | 3799             | 413               | 3249                     | 429                      | 20184         | 640         | 156        | 434              | 244 (91; 536)                      | 9    |
|              | 2         | 16265                 | 3274             | 281               | 2208                     | 291                      | 16759         | 435         | 106        | 264              | 135 (31; 334)                      | 11   |
|              | 4         | -2109                 | 2034             | 222               | 1734                     | 230                      | -2261         | 338         | 84         | 361              | 265 (180; 419)                     | 10   |
| 90 %         | **0.5     | -9299                 | 6721             | 1313              | 10325                    | 1363                     | -15578        | 2033        | 498        | 2192             | 1587 (1103; 2521)                  | 1    |
|              | 1         | 19493                 | 5901             | 785               | 6173                     | 815                      | 17621         | 1215        | 297        | 1036             | 675 (386; 1231)                    | 3    |
|              | 1.5       | 17429                 | 5244             | 579               | 4555                     | 601                      | 16938         | 897         | 219        | 724              | 460 (244; 868)                     | 5    |
|              | 2         | 14259                 | 4719             | 434               | 3409                     | 450                      | 14685         | 671         | 164        | 521              | 323 (163; 631)                     | 8    |
|              | 4         | -4251                 | 3479             | 369               | 2878                     | 383                      | -4401         | 561         | 140        | 606              | 447 (305; 702)                     | 7    |
| *65 %        | 4         | 212975                | 0                | 4672              | 36306                    | 4854                     | 258807        | 7121        | 1774       | 10898            | 8876 (7121; 12147)                 |      |

\*Baseline intervention; values reported as absolute gains and losses.

\*\*optimal intervention.

**Table S29: Seasonal influenza with R<sub>eff</sub>=1.3: costs and benefits associated with each sick leave intervention relative to the baseline, assuming 65% of children and 55% of adults are symptomatic, and with extra mixing.**

| Intervention |           | Mean costs (1000 USD) |                  |                   |                          |                          | Mean benefits |             |            | Output measures  |                                    |      |
|--------------|-----------|-----------------------|------------------|-------------------|--------------------------|--------------------------|---------------|-------------|------------|------------------|------------------------------------|------|
| % on leave   | Max. days | Productivity losses   | Cost of campaign | GP-visits avoided | Hospitalisations avoided | Medication costs avoided | Total costs   | QALYs saved | YPLL saved | Mean NHB (QALYs) | Median NHB (0.25; 0.75 percentile) | Rank |
| 65 %         | 0.5       | 56415                 | 3227             | 686               | 5359                     | 713                      | 52884         | 1044        | 259        | 504              | 205 (-53; 684)                     | 4    |
|              | 1         | 58600                 | 2411             | 300               | 2338                     | 311                      | 58062         | 455         | 113        | -137             | -267 (-379; -59)                   | 12   |
|              | 1.5       | 41983                 | 1757             | 151               | 1179                     | 157                      | 42253         | 230         | 57         | -201             | -266 (-324; -162)                  | 13   |
|              | 2         | 28811                 | 1234             | 46                | 363                      | 48                       | 29588         | 71          | 18         | -231             | -251 (-269; -218)                  | 14   |
| 80 %         | 0.5       | 54754                 | 5276             | 1037              | 8155                     | 1077                     | 49762         | 1605        | 392        | 1097             | 620 (237; 1358)                    | 2    |
|              | 1         | 64107                 | 4456             | 575               | 4519                     | 597                      | 62872         | 889         | 217        | 248              | -15 (-229; 392)                    | 8    |
|              | 1.5       | 48655                 | 3799             | 396               | 3118                     | 411                      | 48529         | 613         | 150        | 119              | -63 (-210; 218)                    | 10   |
|              | 2         | 35949                 | 3274             | 271               | 2131                     | 281                      | 36540         | 419         | 102        | 47               | -77 (-178; 116)                    | 11   |
|              | 4         | 5343                  | 2034             | 215               | 1682                     | 224                      | 5256          | 327         | 81         | 274              | 182 (97; 332)                      | 7    |
| 90 %         | **0.5     | 51612                 | 6721             | 1268              | 9971                     | 1316                     | 45778         | 1962        | 479        | 1496             | 913 (444; 1815)                    | 1    |
|              | 1         | 66240                 | 5901             | 757               | 5954                     | 786                      | 64643         | 1172        | 286        | 512              | 166 (-115; 700)                    | 3    |
|              | 1.5       | 51821                 | 5244             | 560               | 4403                     | 581                      | 51521         | 866         | 211        | 341              | 86 (-123; 482)                     | 6    |
|              | 2         | 39649                 | 4719             | 421               | 3307                     | 436                      | 40204         | 651         | 159        | 241              | 50 (-108; 348)                     | 9    |
|              | 4         | 8061                  | 3479             | 359               | 2801                     | 372                      | 8009          | 545         | 135        | 464              | 311 (169; 560)                     | 5    |
| *65 %        | 4         | 312373                | 0                | 6891              | 53549                    | 7165                     | 379978        | 10498       | 2611       | 16075            | 13092 (10504; 17919)               |      |

\*Baseline intervention; values reported as absolute gains and losses.

\*\*optimal intervention.



**Table S30: Seasonal influenza with R\_eff=1.4: costs and benefits associated with each sick leave intervention relative to the baseline, assuming 65% of children and 55% of adults are symptomatic, and with extra mixing.**

| Intervention |           | Mean costs (1000 USD) |                  |                   |                          |                          | Mean benefits |             |            | Output measures  |                                    |      |
|--------------|-----------|-----------------------|------------------|-------------------|--------------------------|--------------------------|---------------|-------------|------------|------------------|------------------------------------|------|
| % on leave   | Max. days | Productivity losses   | Cost of campaign | GP-visits avoided | Hospitalisations avoided | Medication costs avoided | Total costs   | QALYs saved | YPLL saved | Mean NHB (QALYs) | Median NHB (0.25; 0.75 percentile) | Rank |
| 65 %         | 0.5       | 93396                 | 3227             | 640               | 4996                     | 665                      | 90322         | 973         | 241        | 51               | -228 (-468; 219)                   | 5    |
|              | 1         | 83976                 | 2411             | 278               | 2173                     | 289                      | 83647         | 423         | 105        | -430             | -551 (-656; -357)                  | 14   |
|              | 1.5       | 58084                 | 1757             | 140               | 1094                     | 146                      | 58461         | 213         | 53         | -383             | -443 (-497; -346)                  | 13   |
|              | 2         | 38241                 | 1234             | 43                | 335                      | 45                       | 39052         | 65          | 16         | -333             | -350 (-368; -320)                  | 12   |
| 80 %         | 0.5       | 102721                | 5276             | 980               | 7705                     | 1017                     | 98295         | 1516        | 369        | 513              | 63 (-299; 761)                     | 2    |
|              | 1         | 99337                 | 4456             | 542               | 4264                     | 563                      | 98423         | 839         | 204        | -165             | -414 (-614; -29)                   | 10   |
|              | 1.5       | 73515                 | 3799             | 375               | 2947                     | 389                      | 73603         | 580         | 141        | -171             | -343 (-481; -77)                   | 11   |
|              | 2         | 53318                 | 3274             | 257               | 2022                     | 267                      | 54047         | 398         | 97         | -154             | -270 (-366; -88)                   | 9    |
| 90 %         | 4         | 12106                 | 2034             | 205               | 1601                     | 213                      | 12121         | 312         | 77         | 188              | 101 (20; 243)                      | 4    |
|              | **0.5     | 106581                | 6721             | 1206              | 9485                     | 1253                     | 101358        | 1866        | 455        | 832              | 279 (-167; 1133)                   | 1    |
|              | 1         | 107878                | 5901             | 719               | 5653                     | 746                      | 106661        | 1112        | 271        | 24               | -305 (-571; 205)                   | 6    |
|              | 1.5       | 82429                 | 5244             | 532               | 4183                     | 552                      | 82406         | 823         | 200        | -18              | -259 (-458; 119)                   | 7    |
| *65 %        | 2         | 62235                 | 4719             | 401               | 3151                     | 416                      | 62987         | 620         | 151        | -23              | -205 (-355; 80)                    | 8    |
|              | 4         | 19274                 | 3479             | 342               | 2673                     | 355                      | 19383         | 520         | 129        | 322              | 177 (42; 415)                      | 3    |
|              |           | 394786                | 0                | 8752              | 68013                    | 9108                     | 480658        | 13328       | 3309       | 20415            | 16628 (13343; 22761)               |      |

\*Baseline intervention; values reported as absolute gains and losses.

\*\*optimal intervention.

## B. Moderate pandemic

### i. Epidemiology ( $R_0 = 1.4, 1.6, 1.8$ )

**Table S31: Moderate pandemic influenza with  $R_0=1.4$ : number of avoided cases, GP-visits, hospitalizations, and deaths associated with each sick leave intervention, assuming 65% of children and 55% adults are symptomatic, and with extra mixing.**

| Intervention |            | Median (0.25; 0.75 percentiles) relative to baseline |                   |                         |                             |                        |                  |                | Mean workdays lost (proportion lost to caregiving) |
|--------------|------------|------------------------------------------------------|-------------------|-------------------------|-----------------------------|------------------------|------------------|----------------|----------------------------------------------------|
| % on leave   | Delay time | Symptomatic cases avoided                            | % Reduction in AR | GP-visits avoided       | Hospital admissions avoided | ICU admissions avoided | Avoided Deaths   |                |                                                    |
| 65%          | 0.5        | 90898                                                | 8 %               | 13587 (11562; 15829)    | 655 (276; 1289)             | 65 (27; 130)           | 138 (72; 205)    | 2566950 (0.19) |                                                    |
|              | 1          | 39369                                                | 3 %               | 5885 (5007; 6856)       | 284 (119; 558)              | 28 (12; 56)            | 60 (31; 89)      | 2541953 (0.19) |                                                    |
|              | 1.5        | 19791                                                | 2 %               | 2958 (2517; 3446)       | 143 (60; 281)               | 14 (6; 28)             | 30 (16; 45)      | 2447516 (0.2)  |                                                    |
|              | 2          | 6073                                                 | 1 %               | 908 (772; 1058)         | 44 (18; 86)                 | 4 (2; 9)               | 9 (5; 14)        | 2374564 (0.21) |                                                    |
| 80%          | 0.5        | 146006                                               | 13 %              | 21824 (18571; 25426)    | 1052 (443; 2071)            | 104 (43; 209)          | 221 (116; 330)   | 2874579 (0.16) |                                                    |
|              | 1          | 82429                                                | 7 %               | 12321 (10484; 14354)    | 594 (250; 1169)             | 59 (24; 118)           | 125 (66; 186)    | 2886734 (0.17) |                                                    |
|              | 1.5        | 58242                                                | 5 %               | 8706 (7408; 10142)      | 419 (177; 826)              | 42 (17; 84)            | 88 (46; 132)     | 2789728 (0.17) |                                                    |
|              | 2          | 41358                                                | 4 %               | 6182 (5260; 7202)       | 298 (125; 587)              | 30 (12; 59)            | 63 (33; 93)      | 2712492 (0.18) |                                                    |
|              | 4          | 33904                                                | 3 %               | 5068 (4312; 5904)       | 244 (103; 481)              | 24 (10; 49)            | 51 (27; 77)      | 2545418 (0.19) |                                                    |
| 90%          | 0.5        | 183121                                               | 16 %              | 27372 (23292; 31889)    | 1319 (555; 2597)            | 131 (54; 263)          | 278 (146; 414)   | 3045716 (0.15) |                                                    |
|              | 1          | 111482                                               | 10 %              | 16664 (14180; 19414)    | 803 (338; 1581)             | 80 (33; 160)           | 169 (89; 252)    | 3091439 (0.15) |                                                    |
|              | 1.5        | 84255                                                | 7 %               | 12594 (10717; 14672)    | 607 (255; 1195)             | 60 (25; 121)           | 128 (67; 190)    | 2996658 (0.16) |                                                    |
|              | 2          | 65184                                                | 6 %               | 9743 (8291; 11351)      | 469 (198; 925)              | 47 (19; 93)            | 99 (52; 147)     | 2919377 (0.17) |                                                    |
|              | 4          | 56762                                                | 5 %               | 8485 (7220; 9885)       | 409 (172; 805)              | 41 (17; 81)            | 86 (45; 128)     | 2739108 (0.18) |                                                    |
| *65%         | 4          | 1128247                                              |                   | 168646 (143505; 196473) | 8126 (3421; 16002)          | 806 (332; 1618)        | 1711 (897; 2551) | 2230644 (0.23) |                                                    |

\* This is the baseline intervention; values are reported in absolute terms, and not in terms of avoided cases.

**Table S32: Moderate pandemic influenza with R<sub>0</sub>=1.6: number of avoided cases, GP-visits, hospitalizations, and deaths associated with each sick leave intervention, assuming 65% of children and 55% adults are symptomatic, and with extra mixing.**

| Intervention |            | Median (0.25; 0.75 percentiles) relative to baseline |                   |                         |                             |                        |                   | Mean workdays lost (proportion lost to caregiving) |
|--------------|------------|------------------------------------------------------|-------------------|-------------------------|-----------------------------|------------------------|-------------------|----------------------------------------------------|
| % on leave   | Delay time | Symptomatic cases avoided                            | % Reduction in AR | GP-visits avoided       | Hospital admissions avoided | ICU admissions avoided | Avoided Deaths    |                                                    |
| 65%          | 0.5        | 75874                                                | 5 %               | 11341 (9651; 13213)     | 546 (230; 1076)             | 54 (22; 109)           | 115 (60; 172)     | 3519915 (0.18)                                     |
|              | 1          | 32696                                                | 2 %               | 4887 (4159; 5694)       | 235 (99; 464)               | 23 (10; 47)            | 50 (26; 74)       | 3418511 (0.19)                                     |
|              | 1.5        | 16399                                                | 1 %               | 2451 (2086; 2856)       | 118 (50; 233)               | 12 (5; 24)             | 25 (13; 37)       | 3267365 (0.2)                                      |
|              | 2          | 5029                                                 | 0 %               | 752 (640; 876)          | 36 (15; 71)                 | 4 (1; 7)               | 8 (4; 11)         | 3153834 (0.2)                                      |
| 80%          | 0.5        | 123630                                               | 8 %               | 18480 (15725; 21529)    | 890 (375; 1753)             | 88 (36; 177)           | 187 (98; 279)     | 4032109 (0.15)                                     |
|              | 1          | 69502                                                | 5 %               | 10389 (8840; 12103)     | 501 (211; 986)              | 50 (20; 100)           | 105 (55; 157)     | 3948116 (0.16)                                     |
|              | 1.5        | 49111                                                | 3 %               | 7341 (6247; 8552)       | 354 (149; 697)              | 35 (14; 70)            | 74 (39; 111)      | 3779794 (0.17)                                     |
|              | 2          | 34922                                                | 2 %               | 5220 (4442; 6081)       | 252 (106; 495)              | 25 (10; 50)            | 53 (28; 79)       | 3651586 (0.17)                                     |
| 90%          | 4          | 28685                                                | 2 %               | 4288 (3649; 4995)       | 207 (87; 407)               | 20 (8; 41)             | 44 (23; 65)       | 3415584 (0.19)                                     |
|              | 0.5        | 156304                                               | 10 %              | 23364 (19881; 27219)    | 1126 (474; 2217)            | 112 (46; 224)          | 237 (124; 353)    | 4340679 (0.14)                                     |
|              | 1          | 94619                                                | 6 %               | 14143 (12035; 16477)    | 681 (287; 1342)             | 68 (28; 136)           | 143 (75; 214)     | 4277640 (0.15)                                     |
|              | 1.5        | 71445                                                | 5 %               | 10679 (9087; 12441)     | 515 (217; 1013)             | 51 (21; 102)           | 108 (57; 162)     | 4101838 (0.15)                                     |
| *65%         | 2          | 55299                                                | 4 %               | 8266 (7034; 9630)       | 398 (168; 784)              | 39 (16; 79)            | 84 (44; 125)      | 3966540 (0.16)                                     |
|              | 4          | 48193                                                | 3 %               | 7204 (6130; 8392)       | 347 (146; 684)              | 34 (14; 69)            | 73 (38; 109)      | 3708027 (0.17)                                     |
|              |            | 1495049                                              |                   | 223474 (190160; 260349) | 10768 (4533; 21205)         | 1067 (440; 2144)       | 2267 (1189; 3380) | 2954750 (0.22)                                     |

\* This is the baseline intervention; values are reported in absolute terms, and not in terms of avoided cases.

**Table S33: Moderate pandemic influenza with R<sub>0</sub>=1.8: number of avoided cases, GP-visits, hospitalizations, and deaths associated with each sick leave intervention, assuming 65% of children and 55% adults are symptomatic, and with extra mixing.**

| Intervention |            | Median (0.25; 0.75 percentiles) relative to baseline |                   |                         |                             |                        |                   |                | Mean workdays lost (proportion lost to caregiving) |
|--------------|------------|------------------------------------------------------|-------------------|-------------------------|-----------------------------|------------------------|-------------------|----------------|----------------------------------------------------|
| % on leave   | Delay time | Symptomatic cases avoided                            | % Reduction in AR | GP-visits avoided       | Hospital admissions avoided | ICU admissions avoided | Avoided Deaths    |                |                                                    |
| 65%          | 0.5        | 63318                                                | 4 %               | 9465 (8054; 11026)      | 456 (192; 898)              | 45 (19; 91)            | 96 (50; 143)      | 4214823 (0.17) |                                                    |
|              | 1          | 27196                                                | 2 %               | 4065 (3459; 4736)       | 196 (82; 386)               | 19 (8; 39)             | 41 (22; 61)       | 4054260 (0.18) |                                                    |
|              | 1.5        | 13634                                                | 1 %               | 2038 (1734; 2374)       | 98 (41; 193)                | 10 (4; 20)             | 21 (11; 31)       | 3860499 (0.19) |                                                    |
|              | 2          | 4174                                                 | 0 %               | 624 (531; 727)          | 30 (13; 59)                 | 3 (1; 6)               | 6 (3; 9)          | 3716690 (0.2)  |                                                    |
| 80%          | 0.5        | 104183                                               | 6 %               | 15573 (13251; 18142)    | 750 (316; 1478)             | 74 (31; 149)           | 158 (83; 236)     | 4884145 (0.15) |                                                    |
|              | 1          | 58376                                                | 3 %               | 8726 (7425; 10166)      | 420 (177; 828)              | 42 (17; 84)            | 89 (46; 132)      | 4723586 (0.15) |                                                    |
|              | 1.5        | 41230                                                | 2 %               | 6163 (5244; 7180)       | 297 (125; 585)              | 29 (12; 59)            | 63 (33; 93)       | 4500929 (0.16) |                                                    |
|              | 2          | 29351                                                | 2 %               | 4387 (3733; 5111)       | 211 (89; 416)               | 21 (9; 42)             | 45 (23; 66)       | 4334097 (0.17) |                                                    |
|              | 4          | 24132                                                | 1 %               | 3607 (3069; 4202)       | 174 (73; 342)               | 17 (7; 35)             | 37 (19; 55)       | 4046934 (0.18) |                                                    |
| 90%          | 0.5        | 132427                                               | 8 %               | 19795 (16844; 23061)    | 954 (402; 1878)             | 95 (39; 190)           | 201 (105; 299)    | 5300189 (0.14) |                                                    |
|              | 1          | 79800                                                | 5 %               | 11928 (10150; 13896)    | 575 (242; 1132)             | 57 (23; 114)           | 121 (63; 180)     | 5148743 (0.14) |                                                    |
|              | 1.5        | 60206                                                | 3 %               | 8999 (7658; 10484)      | 434 (183; 854)              | 43 (18; 86)            | 91 (48; 136)      | 4910441 (0.15) |                                                    |
|              | 2          | 46596                                                | 3 %               | 6965 (5927; 8114)       | 336 (141; 661)              | 33 (14; 67)            | 71 (37; 105)      | 4730772 (0.16) |                                                    |
|              | 4          | 40627                                                | 2 %               | 6073 (5167; 7075)       | 293 (123; 576)              | 29 (12; 58)            | 62 (32; 92)       | 4413875 (0.17) |                                                    |
| *65%         | 4          | 1761641                                              |                   | 263324 (224068; 306773) | 12688 (5342; 24986)         | 1258 (518; 2526)       | 2672 (1401; 3982) | 3476939 (0.21) |                                                    |

\* This is the baseline intervention; values are reported in absolute terms, and not in terms of avoided cases.

**ii. Costs and effects (R\_0 = 1.4, 1.6, 1.8)**

**Table S34: Moderate pandemic influenza with R\_0=1.4: costs and benefits associated with each sick leave intervention relative to the baseline, assuming 65% of children and 55% of adults are symptomatic, and with extra mixing.**

| Intervention |           | Mean costs (1000 USD) |                  |                   |                          |                          | Mean benefits |             |            | Output measures  |                                    |      |
|--------------|-----------|-----------------------|------------------|-------------------|--------------------------|--------------------------|---------------|-------------|------------|------------------|------------------------------------|------|
| % on leave   | Max. days | Productivity losses   | Cost of campaign | GP-visits avoided | Hospitalisations avoided | Medication costs avoided | Total costs   | QALYs saved | YPLL saved | Mean NHB (QALYs) | Median NHB (0.25; 0.75 percentile) | Rank |
| 65 %         | 0.5       | 66065                 | 3227             | 930               | 7264                     | 968                      | 60130         | 1435        | 368        | 822              | 418 (67; 1069)                     | 3    |
|              | 1         | 90391                 | 2411             | 403               | 3146                     | 419                      | 88834         | 621         | 159        | -284             | -460 (-611; -179)                  | 12   |
|              | 1.5       | 67974                 | 1757             | 203               | 1581                     | 211                      | 67736         | 312         | 80         | -378             | -466 (-543; -325)                  | 13   |
|              | 2         | 49758                 | 1234             | 62                | 485                      | 65                       | 50380         | 96          | 24         | -418             | -443 (-468; -400)                  | 14   |
| 80 %         | 0.5       | 68887                 | 5276             | 1494              | 11753                    | 1555                     | 59362         | 2345        | 589        | 1740             | 1056 (500; 2115)                   | 2    |
|              | 1         | 115175                | 4456             | 844               | 6635                     | 878                      | 111275        | 1323        | 332        | 188              | -194 (-512; 403)                   | 8    |
|              | 1.5       | 98112                 | 3799             | 596               | 4688                     | 620                      | 96007         | 935         | 234        | -44              | -312 (-538; 112)                   | 10   |
|              | 2         | 82998                 | 3274             | 423               | 3329                     | 440                      | 82079         | 663         | 166        | -174             | -357 (-525; -59)                   | 11   |
|              | 4         | 30933                 | 2034             | 347               | 2709                     | 361                      | 29550         | 534         | 136        | 233              | 91 (-51; 334)                      | 6    |
| 90 %         | **0.5     | 63569                 | 6721             | 1874              | 14740                    | 1950                     | 51726         | 2941        | 739        | 2414             | 1563 (858; 2893)                   | 1    |
|              | 1         | 126251                | 5901             | 1141              | 8974                     | 1187                     | 120850        | 1789        | 449        | 557              | 43 (-389; 852)                     | 4    |
|              | 1.5       | 113537                | 5244             | 862               | 6782                     | 897                      | 110240        | 1352        | 339        | 228              | -152 (-490; 455)                   | 7    |
|              | 2         | 101125                | 4719             | 667               | 5247                     | 694                      | 99237         | 1046        | 262        | 34               | -254 (-520; 220)                   | 9    |
|              | 4         | 48020                 | 3479             | 581               | 4536                     | 604                      | 45778         | 894         | 228        | 428              | 190 (-49; 596)                     | 5    |
| *65 %        | 4         | 851961                | 0                | 11548             | 89742                    | 12038                    | 965289        | 17961       | 4701       | 34441            | 29478 (25108; 37499)               |      |

\*Baseline intervention; values reported as absolute gains and losses.

\*\*optimal intervention.

**Table S35: Moderate pandemic influenza with R<sub>0</sub>=1.6: costs and benefits associated with each sick leave intervention relative to the baseline, assuming 65% of children and 55% of adults are symptomatic, and with extra mixing.**

| Intervention |           | Mean costs (1000 USD) |                  |                   |                          |                          | Mean benefits |             |            | Output measures  |                                    |      |
|--------------|-----------|-----------------------|------------------|-------------------|--------------------------|--------------------------|---------------|-------------|------------|------------------|------------------------------------|------|
| % on leave   | Max. days | Productivity losses   | Cost of campaign | GP-visits avoided | Hospitalisations avoided | Medication costs avoided | Total costs   | QALYs saved | YPLL saved | Mean NHB (QALYs) | Median NHB (0.25; 0.75 percentile) | Rank |
| 65 %         | 0.5       | 159501                | 3227             | 777               | 6063                     | 809                      | 155080        | 1193        | 301        | -388             | -727 (-1019; -187)                 | 5    |
|              | 1         | 150950                | 2411             | 335               | 2613                     | 348                      | 150065        | 514         | 130        | -1016            | -1160 (-1287; -927)                | 11   |
|              | 1.5       | 105594                | 1757             | 168               | 1310                     | 175                      | 105698        | 258         | 65         | -820             | -891 (-956; -774)                  | 7    |
|              | 2         | 70950                 | 1234             | 51                | 402                      | 54                       | 71677         | 79          | 20         | -652             | -671 (-695; -634)                  | 6    |
| 80 %         | 0.5       | 211016                | 5276             | 1265              | 9951                     | 1317                     | 203758        | 1977        | 490        | -100             | -677 (-1151; 222)                  | 2    |
|              | 1         | 219546                | 4456             | 711               | 5594                     | 741                      | 216955        | 1111        | 275        | -1101            | -1421 (-1690; -916)                | 14   |
|              | 1.5       | 176060                | 3799             | 503               | 3953                     | 523                      | 174880        | 785         | 194        | -999             | -1216 (-1416; -861)                | 9    |
|              | 2         | 142041                | 3274             | 357               | 2811                     | 372                      | 141775        | 558         | 137        | -888             | -1037 (-1186; -783)                | 8    |
|              | **4       | 65738                 | 2034             | 294               | 2292                     | 306                      | 64881         | 450         | 113        | -212             | -323 (-454; -114)                  | 3    |
| 90 %         | 0.5       | 237762                | 6721             | 1600              | 12582                    | 1666                     | 228637        | 2500        | 619        | 168              | -556 (-1159; 583)                  | 1    |
|              | 1         | 259836                | 5901             | 968               | 7616                     | 1008                     | 256144        | 1512        | 373        | -1100            | -1520 (-1905; -838)                | 13   |
|              | 1.5       | 218491                | 5244             | 731               | 5751                     | 761                      | 216493        | 1142        | 282        | -1066            | -1375 (-1674; -858)                | 12   |
|              | 2         | 185534                | 4719             | 566               | 4451                     | 589                      | 184647        | 883         | 218        | -1000            | -1230 (-1474; -827)                | 10   |
|              | 4         | 106155                | 3479             | 493               | 3851                     | 513                      | 104776        | 756         | 189        | -312             | -500 (-719; -150)                  | 4    |
| *65 %        | 4         | 1128365               | 0                | 15302             | 118918                   | 15980                    | 1278566       | 23754       | 6175       | 45669            | 39101 (33299; 49714)               |      |

\*Baseline intervention; values reported as absolute gains and losses.

\*\*optimal intervention.

**Table S36: Moderate pandemic influenza with R<sub>0</sub>=1.8: costs and benefits associated with each sick leave intervention relative to the baseline, assuming 65% of children and 55% of adults are symptomatic, and with extra mixing.**

| Intervention |           | Mean costs (1000 USD) |                  |                   |                          |                          | Mean benefits |             |            | Output measures  |                                    |      |
|--------------|-----------|-----------------------|------------------|-------------------|--------------------------|--------------------------|---------------|-------------|------------|------------------|------------------------------------|------|
| % on leave   | Max. days | Productivity losses   | Cost of campaign | GP-visits avoided | Hospitalisations avoided | Medication costs avoided | Total costs   | QALYs saved | YPLL saved | Mean NHB (QALYs) | Median NHB (0.25; 0.75 percentile) | Rank |
| 65 %         | 0.5       | 231499                | 3227             | 648               | 5060                     | 675                      | 228343        | 992         | 248        | -1336            | -1617 (-1862; -1166)               | 5    |
|              | 1         | 196719                | 2411             | 278               | 2173                     | 290                      | 196388        | 426         | 106        | -1577            | -1693 (-1802; -1497)               | 8    |
|              | 1.5       | 133799                | 1757             | 140               | 1089                     | 145                      | 134182        | 214         | 53         | -1155            | -1211 (-1268; -1112)               | 4    |
|              | 2         | 86693                 | 1234             | 43                | 334                      | 45                       | 87506         | 65          | 16         | -827             | -841 (-865; -808)                  | 2    |
| 80 %         | 0.5       | 322418                | 5276             | 1066              | 8386                     | 1111                     | 317131        | 1661        | 406        | -1573            | -2057 (-2457; -1299)               | 7    |
|              | 1         | 299841                | 4456             | 597               | 4699                     | 622                      | 298377        | 930         | 227        | -2113            | -2374 (-2609; -1953)               | 13   |
|              | 1.5       | 235808                | 3799             | 422               | 3319                     | 440                      | 235427        | 657         | 160        | -1744            | -1921 (-2095; -1622)               | 10   |
|              | 2         | 187177                | 3274             | 300               | 2363                     | 313                      | 187475        | 467         | 114        | -1445            | -1562 (-1699; -1345)               | 6    |
|              | **4       | 92734                 | 2034             | 247               | 1928                     | 257                      | 92335         | 377         | 93         | -564             | -648 (-778; -467)                  | 1    |
| 90 %         | 0.5       | 375729                | 6721             | 1355              | 10660                    | 1412                     | 369023        | 2111        | 516        | -1652            | -2253 (-2778; -1296)               | 9    |
|              | 1         | 363572                | 5901             | 817               | 6423                     | 851                      | 361381        | 1271        | 310        | -2414            | -2758 (-3093; -2178)               | 14   |
|              | 1.5       | 299624                | 5244             | 616               | 4846                     | 642                      | 298764        | 959         | 234        | -2088            | -2336 (-2606; -1896)               | 12   |
|              | 2         | 250616                | 4719             | 477               | 3751                     | 497                      | 250611        | 742         | 181        | -1814            | -1992 (-2223; -1648)               | 11   |
|              | 4         | 151458                | 3479             | 416               | 3247                     | 433                      | 150842        | 635         | 157        | -903             | -1045 (-1261; -740)                | 3    |
| *65 %        | 4         | 1327750               | 0                | 18031             | 140123                   | 18861                    | 1504766       | 27943       | 7221       | 53809            | 46074 (39234; 58557)               |      |

\*Baseline intervention; values reported as absolute gains and losses.

\*\*optimal intervention.

## C. Severe pandemic

### i. Epidemiology ( $R_0 = 1.4, 1.6, 1.8$ )

**Table S37: Severe pandemic influenza with  $R_0=1.4$ : number of avoided cases, GP-visits, hospitalizations, and deaths associated with each sick leave intervention, assuming 65% of children and 55% adults are symptomatic, and with extra mixing.**

| Intervention |            | Median (0.25; 0.75 percentiles) relative to baseline |                   |                         |                             |                        |                   |                | Mean workdays lost (proportion lost to caregiving) |
|--------------|------------|------------------------------------------------------|-------------------|-------------------------|-----------------------------|------------------------|-------------------|----------------|----------------------------------------------------|
| % on leave   | Delay time | Symptomatic cases avoided                            | % Reduction in AR | GP-visits avoided       | Hospital admissions avoided | ICU admissions avoided | Avoided Deaths    |                |                                                    |
| 65%          | 0.5        | 90898                                                | 8 %               | 18132 (15839; 20620)    | 1789 (1093; 2741)           | 303 (182; 471)         | 203 (107; 303)    | 2566946 (0.15) |                                                    |
|              | 1          | 39369                                                | 3 %               | 7853 (6860; 8931)       | 775 (473; 1187)             | 131 (79; 204)          | 88 (46; 131)      | 2541949 (0.15) |                                                    |
|              | 1.5        | 19791                                                | 2 %               | 3948 (3449; 4489)       | 389 (238; 597)              | 66 (40; 103)           | 44 (23; 66)       | 2447512 (0.16) |                                                    |
|              | 2          | 6073                                                 | 1 %               | 1211 (1058; 1378)       | 120 (73; 183)               | 20 (12; 31)            | 14 (7; 20)        | 2374560 (0.17) |                                                    |
| 80%          | 0.5        | 146006                                               | 13 %              | 29124 (25442; 33120)    | 2873 (1755; 4404)           | 487 (293; 756)         | 327 (171; 487)    | 2874575 (0.18) |                                                    |
|              | 1          | 82429                                                | 7 %               | 16442 (14363; 18698)    | 1622 (991; 2486)            | 275 (165; 427)         | 184 (97; 275)     | 2886730 (0.16) |                                                    |
|              | 1.5        | 58242                                                | 5 %               | 11618 (10149; 13212)    | 1146 (700; 1757)            | 194 (117; 302)         | 130 (68; 194)     | 2789724 (0.17) |                                                    |
|              | 2          | 41358                                                | 4 %               | 8250 (7207; 9382)       | 814 (497; 1247)             | 138 (83; 214)          | 93 (49; 138)      | 2712488 (0.17) |                                                    |
|              | 4          | 33904                                                | 3 %               | 6763 (5908; 7691)       | 667 (408; 1023)             | 113 (68; 176)          | 76 (40; 113)      | 2545414 (0.18) |                                                    |
| 90%          | 0.5        | 183121                                               | 16 %              | 36527 (31909; 41540)    | 3604 (2201; 5523)           | 611 (367; 949)         | 410 (215; 611)    | 3045713 (0.19) |                                                    |
|              | 1          | 111482                                               | 10 %              | 22237 (19426; 25289)    | 2194 (1340; 3362)           | 372 (224; 577)         | 249 (131; 372)    | 3091435 (0.19) |                                                    |
|              | 1.5        | 84255                                                | 7 %               | 16806 (14682; 19113)    | 1658 (1013; 2541)           | 281 (169; 436)         | 188 (99; 281)     | 2996654 (0.19) |                                                    |
|              | 2          | 65184                                                | 6 %               | 13002 (11358; 14787)    | 1283 (784; 1966)            | 217 (131; 338)         | 146 (76; 217)     | 2919373 (0.2)  |                                                    |
|              | 4          | 56762                                                | 5 %               | 11322 (9891; 12876)     | 1117 (682; 1712)            | 189 (114; 294)         | 127 (67; 189)     | 2739105 (0.21) |                                                    |
| *65%         | 4          | 1128247                                              |                   | 225053 (196600; 255935) | 22204 (13563; 34028)        | 3764 (2264; 5844)      | 2524 (1324; 3762) | 2230640 (0.23) |                                                    |

\* This is the baseline intervention; values are reported in absolute terms, and not in terms of avoided cases.



**Table S38: : Severe pandemic influenza with R<sub>0</sub>=1.6: number of avoided cases, GP-visits, hospitalizations, and deaths associated with each sick leave intervention, assuming 65% of children and 55% adults are symptomatic, and with extra mixing.**

| Intervention |            | Median (0.25; 0.75 percentiles) relative to baseline |                   |                         |                             |                        |                   |                | Mean workdays lost (proportion lost to caregiving) |
|--------------|------------|------------------------------------------------------|-------------------|-------------------------|-----------------------------|------------------------|-------------------|----------------|----------------------------------------------------|
| % on leave   | Delay time | Symptomatic cases avoided                            | % Reduction in AR | GP-visits avoided       | Hospital admissions avoided | ICU admissions avoided | Avoided Deaths    |                |                                                    |
| 65%          | 0.5        | 75874                                                | 5 %               | 15135 (13221; 17212)    | 1493 (912; 2288)            | 253 (152; 393)         | 170 (89; 253)     | 3519910 (0.18) |                                                    |
|              | 1          | 32696                                                | 2 %               | 6522 (5697; 7417)       | 643 (393; 986)              | 109 (66; 169)          | 73 (38; 109)      | 3418506 (0.19) |                                                    |
|              | 1.5        | 16399                                                | 1 %               | 3271 (2858; 3720)       | 323 (197; 495)              | 55 (33; 85)            | 37 (19; 55)       | 3267360 (0.2)  |                                                    |
|              | 2          | 5029                                                 | 0 %               | 1003 (876; 1141)        | 99 (60; 152)                | 17 (10; 26)            | 11 (6; 17)        | 3153828 (0.2)  |                                                    |
| 80%          | 0.5        | 123630                                               | 8 %               | 24661 (21543; 28045)    | 2433 (1486; 3729)           | 412 (248; 640)         | 277 (145; 412)    | 4032104 (0.15) |                                                    |
|              | 1          | 69502                                                | 5 %               | 13864 (12111; 15766)    | 1368 (836; 2096)            | 232 (139; 360)         | 155 (82; 232)     | 3948111 (0.16) |                                                    |
|              | 1.5        | 49111                                                | 3 %               | 9796 (8558; 11141)      | 967 (590; 1481)             | 164 (99; 254)          | 110 (58; 164)     | 3779789 (0.17) |                                                    |
|              | 2          | 34922                                                | 2 %               | 6966 (6085; 7922)       | 687 (420; 1053)             | 117 (70; 181)          | 78 (41; 116)      | 3651581 (0.17) |                                                    |
| 90%          | 4          | 28685                                                | 2 %               | 5722 (4998; 6507)       | 565 (345; 865)              | 96 (58; 149)           | 64 (34; 96)       | 3415578 (0.19) |                                                    |
|              | 0.5        | 156304                                               | 10 %              | 31178 (27236; 35457)    | 3076 (1879; 4714)           | 521 (314; 810)         | 350 (183; 521)    | 4340674 (0.14) |                                                    |
|              | 1          | 94619                                                | 6 %               | 18874 (16488; 21464)    | 1862 (1137; 2854)           | 316 (190; 490)         | 212 (111; 315)    | 4277635 (0.15) |                                                    |
|              | 1.5        | 71445                                                | 5 %               | 14251 (12449; 16207)    | 1406 (859; 2155)            | 238 (143; 370)         | 160 (84; 238)     | 4101833 (0.15) |                                                    |
| *65%         | 2          | 55299                                                | 4 %               | 11031 (9636; 12544)     | 1088 (665; 1668)            | 184 (111; 286)         | 124 (65; 184)     | 3966535 (0.16) |                                                    |
|              | 4          | 48193                                                | 3 %               | 9613 (8398; 10932)      | 948 (579; 1453)             | 161 (97; 250)          | 108 (57; 161)     | 3708022 (0.17) |                                                    |
|              | 4          | 1495049                                              |                   | 298219 (260516; 339142) | 29422 (17973; 45090)        | 4988 (3000; 7744)      | 3344 (1754; 4985) | 2954745 (0.22) |                                                    |

\* This is the baseline intervention; values are reported in absolute terms, and not in terms of avoided cases.

**Table S39: Severe pandemic influenza with R<sub>0</sub>=1.8: number of avoided cases, GP-visits, hospitalizations, and deaths associated with each sick leave intervention, assuming 65% of children and 55% adults are symptomatic, and with extra mixing.**

| Intervention |            |                           |                   | Median (0.25; 0.75 percentiles) relative to baseline |                             |                        |                   |                | Mean workdays lost (proportion lost to caregiving) |
|--------------|------------|---------------------------|-------------------|------------------------------------------------------|-----------------------------|------------------------|-------------------|----------------|----------------------------------------------------|
| % on leave   | Delay time | Symptomatic cases avoided | % Reduction in AR | GP-visits avoided                                    | Hospital admissions avoided | ICU admissions avoided | Avoided Deaths    |                |                                                    |
| 65%          | 0.5        | 63318                     | 4 %               | 12630 (11033; 14363)                                 | 1246 (761; 1910)            | 211 (127; 328)         | 142 (74; 211)     | 4214817 (0.17) |                                                    |
|              | 1          | 27196                     | 2 %               | 5425 (4739; 6169)                                    | 535 (327; 820)              | 91 (55; 141)           | 61 (32; 91)       | 4054254 (0.18) |                                                    |
|              | 1.5        | 13634                     | 1 %               | 2720 (2376; 3093)                                    | 268 (164; 411)              | 45 (27; 71)            | 30 (16; 45)       | 3860493 (0.19) |                                                    |
|              | 2          | 4174                      | 0 %               | 833 (727; 947)                                       | 82 (50; 126)                | 14 (8; 22)             | 9 (5; 14)         | 3716684 (0.2)  |                                                    |
| 80%          | 0.5        | 104183                    | 6 %               | 20781 (18154; 23633)                                 | 2050 (1252; 3142)           | 348 (209; 540)         | 233 (122; 347)    | 4884140 (0.15) |                                                    |
|              | 1          | 58376                     | 3 %               | 11644 (10172; 13242)                                 | 1149 (702; 1761)            | 195 (117; 302)         | 131 (69; 195)     | 4723580 (0.15) |                                                    |
|              | 1.5        | 41230                     | 2 %               | 8224 (7184; 9353)                                    | 811 (496; 1243)             | 138 (83; 214)          | 92 (48; 137)      | 4500923 (0.16) |                                                    |
|              | 2          | 29351                     | 2 %               | 5855 (5114; 6658)                                    | 578 (353; 885)              | 98 (59; 152)           | 66 (34; 98)       | 4334091 (0.17) |                                                    |
| 90%          | 4          | 24132                     | 1 %               | 4814 (4205; 5474)                                    | 475 (290; 728)              | 81 (48; 125)           | 54 (28; 80)       | 4046928 (0.18) |                                                    |
|              | 0.5        | 132427                    | 8 %               | 26415 (23076; 30040)                                 | 2606 (1592; 3994)           | 442 (266; 686)         | 296 (155; 442)    | 5300183 (0.14) |                                                    |
|              | 1          | 79800                     | 5 %               | 15918 (13905; 18102)                                 | 1570 (959; 2407)            | 266 (160; 413)         | 178 (94; 266)     | 5148737 (0.14) |                                                    |
|              | 1.5        | 60206                     | 3 %               | 12009 (10491; 13657)                                 | 1185 (724; 1816)            | 201 (121; 312)         | 135 (71; 201)     | 4910435 (0.15) |                                                    |
| *65%         | 2          | 46596                     | 3 %               | 9295 (8119; 10570)                                   | 917 (560; 1405)             | 155 (93; 241)          | 104 (55; 155)     | 4730766 (0.16) |                                                    |
|              | 4          | 40627                     | 2 %               | 8104 (7079; 9216)                                    | 800 (488; 1225)             | 136 (82; 210)          | 91 (48; 135)      | 4413869 (0.17) |                                                    |
| *65%         | 4          | 1761641                   |                   | 351396 (306970; 399616)                              | 34669 (21178; 53131)        | 5878 (3534; 9125)      | 3940 (2067; 5873) | 3476933 (0.21) |                                                    |

\* This is the baseline intervention; values are reported in absolute terms, and not in terms of avoided cases.

**ii. Costs and effects (R<sub>0</sub> = 1.4, 1.6, 1.8)**

**Table S40: Severe pandemic influenza with R<sub>0</sub>=1.4: costs and benefits associated with each sick leave intervention relative to the baseline, assuming 65% of children and 55% of adults are symptomatic, and with extra mixing.**

| Intervention |           | Mean costs (1000 USD) |                  |                   |                          |                          | Mean benefits |             |            | Output measures  |                                    |      |
|--------------|-----------|-----------------------|------------------|-------------------|--------------------------|--------------------------|---------------|-------------|------------|------------------|------------------------------------|------|
| % on leave   | Max. days | Productivity losses   | Cost of campaign | GP-visits avoided | Hospitalisations avoided | Medication costs avoided | Total costs   | QALYs saved | YPLL saved | Mean NHB (QALYs) | Median NHB (0.25; 0.75 percentile) | Rank |
| 65 %         | 0.5       | 66060                 | 3228             | 1241              | 20709                    | 1016                     | 46322         | 1593        | 542        | 1120             | 727 (356; 1388)                    | 3    |
|              | 1         | 90384                 | 2411             | 537               | 8969                     | 440                      | 82848         | 690         | 235        | -155             | -325 (-487; -38)                   | 12   |
|              | 1.5       | 67968                 | 1757             | 270               | 4509                     | 221                      | 64725         | 347         | 118        | -313             | -398 (-480; -255)                  | 13   |
|              | 2         | 49754                 | 1235             | 83                | 1384                     | 68                       | 49454         | 106         | 36         | -398             | -423 (-449; -378)                  | 14   |
| 80 %         | 0.5       | 68872                 | 5275             | 1993              | 33366                    | 1632                     | 37156         | 2601        | 869        | 2223             | 1559 (962; 2624)                   | 2    |
|              | 1         | 115161                | 4455             | 1125              | 18837                    | 921                      | 98732         | 1468        | 490        | 461              | 88 (-251; 687)                     | 7    |
|              | 1.5       | 98097                 | 3799             | 795               | 13310                    | 651                      | 87140         | 1036        | 345        | 148              | -110 (-356; 310)                   | 10   |
|              | 2         | 82982                 | 3274             | 565               | 9451                     | 462                      | 75778         | 736         | 245        | -37              | -217 (-395; 83)                    | 11   |
|              | 4         | 30960                 | 2034             | 463               | 7724                     | 379                      | 24428         | 592         | 200        | 343              | 208 (55; 454)                      | 8    |
| 90 %         | **0.5     | 63541                 | 6720             | 2500              | 41848                    | 2047                     | 23867         | 3262        | 1090       | 3019             | 2192 (1438; 3522)                  | 1    |
|              | 1         | 126224                | 5900             | 1522              | 25476                    | 1246                     | 103879        | 1985        | 662        | 925              | 433 (-40; 1234)                    | 4    |
|              | 1.5       | 113510                | 5244             | 1150              | 19254                    | 942                      | 97408         | 1499        | 499        | 506              | 136 (-222; 748)                    | 6    |
|              | 2         | 101098                | 4719             | 890               | 14896                    | 728                      | 89303         | 1159        | 386        | 249              | -33 (-316; 441)                    | 9    |
|              | 4         | 48064                 | 3480             | 775               | 12932                    | 634                      | 37203         | 992         | 336        | 612              | 385 (130; 798)                     | 5    |
| *65 %        | 4         | 851968                | 0                | 15404             | 257088                   | 12638                    | 1137098       | 19969       | 6934       | 38201            | 33462 (28809; 41566)               |      |

\*Baseline intervention; values reported as absolute gains and losses.

\*\*optimal intervention.

**Table S41: Severe pandemic influenza with R<sub>0</sub>=1.6: costs and benefits associated with each sick leave intervention relative to the baseline, assuming 65% of children and 55% of adults are symptomatic, and with extra mixing.**

| Intervention |           | Mean costs (1000 USD) |                  |                   |                          |                          | Mean benefits |             |            | Output measures  |                                    |      |
|--------------|-----------|-----------------------|------------------|-------------------|--------------------------|--------------------------|---------------|-------------|------------|------------------|------------------------------------|------|
| % on leave   | Max. days | Productivity losses   | Cost of campaign | GP-visits avoided | Hospitalisations avoided | Medication costs avoided | Total costs   | QALYs saved | YPLL saved | Mean NHB (QALYs) | Median NHB (0.25; 0.75 percentile) | Rank |
| 65 %         | 0.5       | 159488                | 3228             | 1036              | 17286                    | 849                      | 143545        | 1322        | 444        | -142             | -471 (-781; 80)                    | 4    |
|              | 1         | 150938                | 2411             | 446               | 7449                     | 366                      | 145088        | 570         | 191        | -910             | -1050 (-1184; -813)                | 14   |
|              | 1.5       | 105585                | 1757             | 224               | 3736                     | 183                      | 103199        | 286         | 96         | -767             | -836 (-905; -716)                  | 7    |
|              | 2         | 70944                 | 1235             | 69                | 1146                     | 56                       | 70908         | 88          | 29         | -636             | -654 (-679; -617)                  | 6    |
| 80 %         | 0.5       | 210998                | 5275             | 1688              | 28252                    | 1383                     | 184949        | 2190        | 722        | 304              | -255 (-764; 644)                   | 2    |
|              | 1         | 219528                | 4455             | 949               | 15883                    | 777                      | 206373        | 1230        | 405        | -874             | -1181 (-1475; -682)                | 13   |
|              | 1.5       | 176040                | 3799             | 671               | 11223                    | 549                      | 167396        | 869         | 286        | -838             | -1051 (-1264; -695)                | 12   |
|              | 2         | 142021                | 3274             | 477               | 7981                     | 391                      | 136447        | 618         | 203        | -774             | -918 (-1078; -665)                 | 8    |
| 90 %         | 4         | 65773                 | 2034             | 392               | 6535                     | 321                      | 60560         | 498         | 166        | -119             | -226 (-366; -15)                   | 3    |
|              | **0.5     | 237726                | 6720             | 2134              | 35719                    | 1749                     | 204844        | 2769        | 912        | 680              | -16 (-672; 1112)                   | 1    |
|              | 1         | 259801                | 5900             | 1292              | 21623                    | 1058                     | 241728        | 1675        | 551        | -790             | -1203 (-1610; -514)                | 9    |
|              | 1.5       | 218456                | 5244             | 975               | 16327                    | 799                      | 205599        | 1264        | 415        | -833             | -1135 (-1452; -615)                | 11   |
| *65 %        | 2         | 185498                | 4719             | 755               | 12637                    | 618                      | 176206        | 978         | 321        | -819             | -1042 (-1302; -640)                | 10   |
|              | 4         | 106211                | 3480             | 658               | 10979                    | 539                      | 97515         | 837         | 279        | -157             | -337 (-572; 14)                    | 5    |
| *65 %        | 4         | 1128377               | 0                | 20412             | 340670                   | 16776                    | 1506235       | 26393       | 9107       | 50631            | 44341 (38182; 55091)               |      |

\*Baseline intervention; values reported as absolute gains and losses.

\*\*optimal intervention.

**Table S42: Severe pandemic influenza with R<sub>0</sub>=1.8: costs and benefits associated with each sick leave intervention relative to the baseline, assuming 65% of children and 55% of adults are symptomatic, and with extra mixing.**

| Intervention |           | Mean costs (1000 USD) |                  |                   |                          |                          | Mean benefits |             |            | Output measures  |                                    |      |
|--------------|-----------|-----------------------|------------------|-------------------|--------------------------|--------------------------|---------------|-------------|------------|------------------|------------------------------------|------|
| % on leave   | Max. days | Productivity losses   | Cost of campaign | GP-visits avoided | Hospitalisations avoided | Medication costs avoided | Total costs   | QALYs saved | YPLL saved | Mean NHB (QALYs) | Median NHB (0.25; 0.75 percentile) | Rank |
| 65 %         | 0.5       | 231480                | 3228             | 864               | 14425                    | 709                      | 218709        | 1099        | 365        | -1132            | -1403 (-1663; -944)                | 5    |
|              | 1         | 196703                | 2411             | 371               | 6196                     | 304                      | 192242        | 472         | 157        | -1489            | -1602 (-1719; -1404)               | 9    |
|              | 1.5       | 133788                | 1757             | 186               | 3106                     | 153                      | 132101        | 236         | 79         | -1111            | -1164 (-1226; -1064)               | 4    |
|              | 2         | 86686                 | 1235             | 57                | 951                      | 47                       | 86865         | 72          | 24         | -813             | -828 (-852; -794)                  | 3    |
| 80 %         | 0.5       | 322398                | 5275             | 1422              | 23808                    | 1166                     | 301276        | 1838        | 599        | -1234            | -1704 (-2135; -950)                | 7    |
|              | 1         | 299820                | 4455             | 797               | 13340                    | 653                      | 289484        | 1029        | 335        | -1923            | -2178 (-2429; -1756)               | 13   |
|              | 1.5       | 235786                | 3799             | 563               | 9422                     | 461                      | 229138        | 727         | 236        | -1610            | -1782 (-1969; -1484)               | 10   |
|              | 2         | 187154                | 3274             | 401               | 6707                     | 328                      | 182991        | 517         | 168        | -1349            | -1463 (-1610; -1246)               | 8    |
|              | **4       | 92774                 | 2034             | 329               | 5498                     | 270                      | 88710         | 417         | 138        | -487             | -570 (-703; -384)                  | 1    |
| 90 %         | 0.5       | 375687                | 6720             | 1808              | 30263                    | 1482                     | 348854        | 2336        | 761        | -1222            | -1800 (-2368; -845)                | 6    |
|              | 1         | 363531                | 5900             | 1089              | 18236                    | 893                      | 349212        | 1406        | 458        | -2155            | -2490 (-2848; -1911)               | 14   |
|              | 1.5       | 299583                | 5244             | 822               | 13759                    | 674                      | 289572        | 1061        | 345        | -1892            | -2133 (-2421; -1694)               | 12   |
|              | 2         | 250574                | 4719             | 636               | 10648                    | 521                      | 243488        | 820         | 266        | -1663            | -1836 (-2081; -1488)               | 11   |
|              | 4         | 151524                | 3480             | 555               | 9256                     | 455                      | 144739        | 703         | 232        | -773             | -913 (-1135; -602)                 | 2    |
| *65 %        | 4         | 1327765               | 0                | 24051             | 401417                   | 19801                    | 1773034       | 31031       | 10650      | 59633            | 52215 (44964; 64891)               |      |

\*Baseline intervention; values reported as absolute gains and losses.

\*\*optimal intervention.

## D. Very severe pandemic

### i. Epidemiology ( $R_0 = 1.4, 1.6, 1.8$ )

**Table S43: Very severe pandemic influenza with  $R_0=1.4$ : number of avoided cases, GP-visits, hospitalizations, and deaths associated with each sick leave intervention, assuming 65% of children and 55% adults are symptomatic, and with extra mixing.**

| Intervention |            | Median (0.25; 0.75 percentiles) relative to baseline |                   |                         |                             |                        |                    |                | Mean workdays lost (proportion lost to caregiving) |
|--------------|------------|------------------------------------------------------|-------------------|-------------------------|-----------------------------|------------------------|--------------------|----------------|----------------------------------------------------|
| % on leave   | Delay time | Symptomatic cases avoided                            | % Reduction in AR | GP-visits avoided       | Hospital admissions avoided | ICU admissions avoided | Avoided Deaths     |                |                                                    |
| 65%          | 0.5        | 90898                                                | 8 %               | 22680 (20187; 25353)    | 3151 (2198; 4364)           | 786 (540; 1103)        | 634 (332; 943)     | 2566939 (0.19) |                                                    |
|              | 1          | 39369                                                | 3 %               | 9823 (8743; 10981)      | 1365 (952; 1890)            | 340 (234; 478)         | 274 (144; 409)     | 2541942 (0.19) |                                                    |
|              | 1.5        | 19791                                                | 2 %               | 4938 (4395; 5520)       | 686 (479; 950)              | 171 (118; 240)         | 138 (72; 205)      | 2447504 (0.2)  |                                                    |
|              | 2          | 6073                                                 | 1 %               | 1515 (1349; 1694)       | 211 (147; 292)              | 52 (36; 74)            | 42 (22; 63)        | 2374553 (0.21) |                                                    |
| 80%          | 0.5        | 146006                                               | 13 %              | 36429 (32426; 40723)    | 5062 (3531; 7010)           | 1262 (867; 1772)       | 1018 (533; 1515)   | 2874568 (0.16) |                                                    |
|              | 1          | 82429                                                | 7 %               | 20566 (18306; 22991)    | 2858 (1993; 3957)           | 712 (489; 1000)        | 575 (301; 855)     | 2886723 (0.17) |                                                    |
|              | 1.5        | 58242                                                | 5 %               | 14532 (12935; 16244)    | 2019 (1408; 2796)           | 503 (346; 707)         | 406 (213; 604)     | 2789717 (0.17) |                                                    |
|              | 2          | 41358                                                | 4 %               | 10319 (9185; 11535)     | 1434 (1000; 1986)           | 357 (246; 502)         | 288 (151; 429)     | 2712481 (0.18) |                                                    |
|              | 4          | 33904                                                | 3 %               | 8459 (7530; 9456)       | 1175 (820; 1628)            | 293 (201; 411)         | 236 (124; 352)     | 2545406 (0.19) |                                                    |
| 90%          | 0.5        | 183121                                               | 16 %              | 45690 (40668; 51075)    | 6349 (4428; 8792)           | 1583 (1087; 2222)      | 1277 (669; 1900)   | 3045706 (0.15) |                                                    |
|              | 1          | 111482                                               | 10 %              | 27815 (24758; 31094)    | 3865 (2696; 5352)           | 964 (662; 1353)        | 777 (407; 1157)    | 3091428 (0.15) |                                                    |
|              | 1.5        | 84255                                                | 7 %               | 21022 (18712; 23500)    | 2921 (2037; 4045)           | 728 (500; 1022)        | 587 (308; 874)     | 2996647 (0.16) |                                                    |
|              | 2          | 65184                                                | 6 %               | 16264 (14476; 18181)    | 2260 (1576; 3130)           | 563 (387; 791)         | 454 (238; 676)     | 2919366 (0.17) |                                                    |
|              | 4          | 56762                                                | 5 %               | 14162 (12606; 15832)    | 1968 (1373; 2725)           | 491 (337; 689)         | 396 (207; 589)     | 2739097 (0.18) |                                                    |
| *65%         | 4          | 1128247                                              |                   | 281504 (250567; 314683) | 39116 (27282; 54168)        | 9752 (6699; 13692)     | 7866 (4120; 11707) | 2230632 (0.23) |                                                    |

\* This is the baseline intervention; values are reported in absolute terms, and not in terms of avoided cases.

**Table S44: Very severe pandemic influenza with R<sub>0</sub>=1.6: number of avoided cases, GP-visits, hospitalizations, and deaths associated with each sick leave intervention, assuming 65% of children and 55% adults are symptomatic, and with extra mixing.**

| Intervention |            | Median (0.25; 0.75 percentiles) relative to baseline |                   |                         |                             |                        |                     |                | Mean workdays lost (proportion lost to caregiving) |
|--------------|------------|------------------------------------------------------|-------------------|-------------------------|-----------------------------|------------------------|---------------------|----------------|----------------------------------------------------|
| % on leave   | Delay time | Symptomatic cases avoided                            | % Reduction in AR | GP-visits avoided       | Hospital admissions avoided | ICU admissions avoided | Avoided Deaths      |                |                                                    |
| 65%          | 0.5        | 75874                                                | 5 %               | 18931 (16850; 21162)    | 2630 (1835; 3643)           | 656 (451; 921)         | 529 (277; 787)      | 3519901 (0.18) |                                                    |
|              | 1          | 32696                                                | 2 %               | 8158 (7261; 9119)       | 1134 (791; 1570)            | 283 (194; 397)         | 228 (119; 339)      | 3418496 (0.19) |                                                    |
|              | 1.5        | 16399                                                | 1 %               | 4092 (3642; 4574)       | 569 (397; 787)              | 142 (97; 199)          | 114 (60; 170)       | 3267350 (0.2)  |                                                    |
|              | 2          | 5029                                                 | 0 %               | 1255 (1117; 1403)       | 174 (122; 241)              | 43 (30; 61)            | 35 (18; 52)         | 3153819 (0.2)  |                                                    |
| 80%          | 0.5        | 123630                                               | 8 %               | 30846 (27456; 34482)    | 4286 (2990; 5936)           | 1069 (734; 1500)       | 862 (451; 1283)     | 4032095 (0.15) |                                                    |
|              | 1          | 69502                                                | 5 %               | 17341 (15435; 19385)    | 2410 (1681; 3337)           | 601 (413; 843)         | 485 (254; 721)      | 3948102 (0.16) |                                                    |
|              | 1.5        | 49111                                                | 3 %               | 12253 (10907; 13698)    | 1703 (1188; 2358)           | 424 (292; 596)         | 342 (179; 510)      | 3779780 (0.17) |                                                    |
|              | 2          | 34922                                                | 2 %               | 8713 (7756; 9740)       | 1211 (844; 1677)            | 302 (207; 424)         | 243 (128; 362)      | 3651571 (0.17) |                                                    |
| 90%          | 4          | 28685                                                | 2 %               | 7157 (6371; 8001)       | 994 (694; 1377)             | 248 (170; 348)         | 200 (105; 298)      | 3415569 (0.19) |                                                    |
|              | 0.5        | 156304                                               | 10 %              | 38999 (34713; 43595)    | 5419 (3780; 7504)           | 1351 (928; 1897)       | 1090 (571; 1622)    | 4340665 (0.14) |                                                    |
|              | 1          | 94619                                                | 6 %               | 23608 (21013; 26391)    | 3280 (2288; 4543)           | 818 (562; 1148)        | 660 (346; 982)      | 4277625 (0.15) |                                                    |
|              | 1.5        | 71445                                                | 5 %               | 17826 (15867; 19927)    | 2477 (1728; 3430)           | 618 (424; 867)         | 498 (261; 741)      | 4101824 (0.15) |                                                    |
| *65%         | 2          | 55299                                                | 4 %               | 13797 (12281; 15424)    | 1917 (1337; 2655)           | 478 (328; 671)         | 386 (202; 574)      | 3966525 (0.16) |                                                    |
|              | 4          | 48193                                                | 3 %               | 12024 (10703; 13442)    | 1671 (1165; 2314)           | 417 (286; 585)         | 336 (176; 500)      | 3708012 (0.17) |                                                    |
|              |            | 1495049                                              |                   | 373023 (332028; 416989) | 51832 (36152; 71778)        | 12922 (8877; 18143)    | 10423 (5459; 15514) | 2954735 (0.22) |                                                    |

\* This is the baseline intervention; values are reported in absolute terms, and not in terms of avoided cases.

**Table S45 Very severe pandemic influenza with R<sub>0</sub>=1.8: number of avoided cases, GP-visits, hospitalizations, and deaths associated with each sick leave intervention, assuming 65% of children and 55% adults are symptomatic, and with extra mixing.**

| Intervention |            | Median (0.25; 0.75 percentiles) relative to baseline |                   |                         |                             |                        |                     |                | Mean workdays lost (proportion lost to caregiving) |
|--------------|------------|------------------------------------------------------|-------------------|-------------------------|-----------------------------|------------------------|---------------------|----------------|----------------------------------------------------|
| % on leave   | Delay time | Symptomatic cases avoided                            | % Reduction in AR | GP-visits avoided       | Hospital admissions avoided | ICU admissions avoided | Avoided Deaths      |                |                                                    |
| 65%          | 0.5        | 63318                                                | 4 %               | 15798 (14062; 17660)    | 2195 (1531; 3040)           | 547 (376; 768)         | 441 (231; 657)      | 4214806 (0.17) |                                                    |
|              | 1          | 27196                                                | 2 %               | 6786 (6040; 7585)       | 943 (658; 1306)             | 235 (161; 330)         | 190 (99; 282)       | 4054243 (0.18) |                                                    |
|              | 1.5        | 13634                                                | 1 %               | 3402 (3028; 3803)       | 473 (330; 655)              | 118 (81; 165)          | 95 (50; 141)        | 3860482 (0.19) |                                                    |
|              | 2          | 4174                                                 | 0 %               | 1041 (927; 1164)        | 145 (101; 200)              | 36 (25; 51)            | 29 (15; 43)         | 3716673 (0.2)  |                                                    |
| 80%          | 0.5        | 104183                                               | 6 %               | 25994 (23137; 29058)    | 3612 (2519; 5002)           | 900 (619; 1264)        | 726 (380; 1081)     | 4884129 (0.15) |                                                    |
|              | 1          | 58376                                                | 3 %               | 14565 (12964; 16282)    | 2024 (1412; 2803)           | 505 (347; 708)         | 407 (213; 606)      | 4723570 (0.15) |                                                    |
|              | 1.5        | 41230                                                | 2 %               | 10287 (9157; 11500)     | 1429 (997; 1979)            | 356 (245; 500)         | 287 (151; 428)      | 4500912 (0.16) |                                                    |
|              | 2          | 29351                                                | 2 %               | 7323 (6518; 8186)       | 1018 (710; 1409)            | 254 (174; 356)         | 205 (107; 305)      | 4334080 (0.17) |                                                    |
| 90%          | 4          | 24132                                                | 1 %               | 6021 (5359; 6731)       | 837 (584; 1159)             | 209 (143; 293)         | 168 (88; 250)       | 4046917 (0.18) |                                                    |
|              | 0.5        | 132427                                               | 8 %               | 33041 (29410; 36936)    | 4591 (3202; 6358)           | 1145 (786; 1607)       | 923 (484; 1374)     | 5300173 (0.14) |                                                    |
|              | 1          | 79800                                                | 5 %               | 19911 (17722; 22257)    | 2767 (1930; 3831)           | 690 (474; 968)         | 556 (291; 828)      | 5148726 (0.14) |                                                    |
|              | 1.5        | 60206                                                | 3 %               | 15022 (13371; 16792)    | 2087 (1456; 2891)           | 520 (357; 731)         | 420 (220; 625)      | 4910424 (0.15) |                                                    |
| *65%         | 2          | 46596                                                | 3 %               | 11626 (10348; 12996)    | 1615 (1127; 2237)           | 403 (277; 565)         | 325 (170; 484)      | 4730755 (0.16) |                                                    |
|              | 4          | 40627                                                | 2 %               | 10137 (9023; 11331)     | 1409 (982; 1951)            | 351 (241; 493)         | 283 (148; 422)      | 4413858 (0.17) |                                                    |
|              |            | 1761641                                              |                   | 439539 (391234; 491346) | 61075 (42599; 84577)        | 15227 (10460; 21378)   | 12282 (6433; 18280) | 3476922 (0.21) |                                                    |

\* This is the baseline intervention; values are reported in absolute terms, and not in terms of avoided cases.



ii. Costs and effects (R\_0 = 1.4, 1.6, 1.8)

Table S46: Very severe pandemic influenza with R\_0=1.4: costs and benefits associated with each sick leave intervention relative to the baseline, assuming 65% of children and 55% of adults are symptomatic, and with extra mixing.

| Intervention |           | Mean costs (1000 USD) |                  |                   |                          |                          | Mean benefits |             |            | Output measures  |                                    |      |
|--------------|-----------|-----------------------|------------------|-------------------|--------------------------|--------------------------|---------------|-------------|------------|------------------|------------------------------------|------|
| % on leave   | Max. days | Productivity losses   | Cost of campaign | GP-visits avoided | Hospitalisations avoided | Medication costs avoided | Total costs   | QALYs saved | YPLL saved | Mean NHB (QALYs) | Median NHB (0.25; 0.75 percentile) | Rank |
| 65 %         | 0.5       | 66066                 | 3226             | 1552              | 39055                    | 1064                     | 27622         | 2544        | 1690       | 2263             | 1933 (1454; 2630)                  | 4    |
|              | 1         | 90396                 | 2409             | 672               | 16915                    | 461                      | 74757         | 1101        | 731        | 339              | 198 (-12; 500)                     | 12   |
|              | 1.5       | 67977                 | 1756             | 338               | 8503                     | 232                      | 60661         | 553         | 367        | -65              | -135 (-241; 16)                    | 13   |
|              | 2         | 49761                 | 1234             | 104               | 2609                     | 71                       | 48211         | 170         | 113        | -322             | -342 (-376; -296)                  | 14   |
| 80 %         | 0.5       | 68876                 | 5277             | 2492              | 62736                    | 1709                     | 7217          | 4126        | 2709       | 4053             | 3494 (2742; 4627)                  | 2    |
|              | 1         | 115167                | 4456             | 1407              | 35418                    | 965                      | 81834         | 2326        | 1525       | 1492             | 1178 (748; 1819)                   | 6    |
|              | 1.5       | 98104                 | 3799             | 994               | 25025                    | 682                      | 75203         | 1642        | 1076       | 875              | 655 (347; 1107)                    | 9    |
|              | 2         | 82991                 | 3274             | 706               | 17771                    | 484                      | 67304         | 1165        | 762        | 478              | 324 (101; 646)                     | 11   |
|              | 4         | 30913                 | 2033             | 579               | 14567                    | 397                      | 17404         | 944         | 624        | 766              | 649 (460; 918)                     | 10   |
| 90 %         | **0.5     | 63552                 | 6722             | 3126              | 78683                    | 2144                     | -13678        | 5175        | 3396       | 5314             | 4622 (3664; 6040)                  | 1    |
|              | 1         | 126237                | 5901             | 1903              | 47901                    | 1305                     | 81029         | 3145        | 2062       | 2319             | 1899 (1310; 2763)                  | 3    |
|              | 1.5       | 113525                | 5244             | 1438              | 36202                    | 986                      | 80142         | 2375        | 1556       | 1558             | 1241 (790; 1898)                   | 5    |
|              | 2         | 101114                | 4718             | 1113              | 28008                    | 763                      | 75948         | 1836        | 1202       | 1061             | 819 (466; 1327)                    | 8    |
|              | 4         | 47988                 | 3477             | 969               | 24388                    | 664                      | 25444         | 1580        | 1045       | 1321             | 1124 (808; 1574)                   | 7    |
| *65 %        | 4         | 851966                | 0                | 19259             | 482073                   | 13234                    | 1366532       | 32093       | 21601      | 52664            | 48727 (42834; 57333)               |      |

\*Baseline intervention; values reported as absolute gains and losses.  
\*\*optimal intervention.

**Table S47: Very severe pandemic influenza with R<sub>0</sub>=1.6: costs and benefits associated with each sick leave intervention relative to the baseline, assuming 65% of children and 55% of adults are symptomatic, and with extra mixing.**

| Intervention |           | Mean costs (1000 USD) |                  |                   |                          |                          | Mean benefits |             |            | Output measures  |                                    |      |
|--------------|-----------|-----------------------|------------------|-------------------|--------------------------|--------------------------|---------------|-------------|------------|------------------|------------------------------------|------|
| % on leave   | Max. days | Productivity losses   | Cost of campaign | GP-visits avoided | Hospitalisations avoided | Medication costs avoided | Total costs   | QALYs saved | YPLL saved | Mean NHB (QALYs) | Median NHB (0.25; 0.75 percentile) | Rank |
| 65 %         | 0.5       | 159509                | 3226             | 1295              | 32600                    | 889                      | 127951        | 2101        | 1384       | 796              | 521 (121; 1106)                    | 3    |
|              | 1         | 150958                | 2409             | 558               | 14048                    | 383                      | 138378        | 905         | 596        | -506             | -622 (-797; -372)                  | 12   |
|              | 1.5       | 105600                | 1756             | 280               | 7046                     | 192                      | 99838         | 454         | 299        | -564             | -621 (-710; -496)                  | 13   |
|              | 2         | 70954                 | 1234             | 86                | 2161                     | 59                       | 69882         | 139         | 92         | -574             | -590 (-620; -550)                  | 14   |
| 80 %         | 0.5       | 211006                | 5277             | 2110              | 53121                    | 1448                     | 159603        | 3456        | 2249       | 1828             | 1355 (716; 2311)                   | 2    |
|              | 1         | 219538                | 4456             | 1186              | 29863                    | 814                      | 192130        | 1940        | 1261       | -19              | -282 (-650; 258)                   | 8    |
|              | 1.5       | 176052                | 3799             | 838               | 21102                    | 575                      | 157336        | 1369        | 890        | -235             | -419 (-682; -37)                   | 10   |
|              | 2         | 142033                | 3274             | 596               | 15005                    | 409                      | 129297        | 973         | 631        | -346             | -473 (-669; -200)                  | 11   |
|              | 4         | 65714                 | 2033             | 490               | 12325                    | 336                      | 54597         | 789         | 518        | 233              | 139 (-33; 369)                     | 6    |
| 90 %         | **0.5     | 237745                | 6722             | 2668              | 67160                    | 1831                     | 172807        | 4367        | 2842       | 2605             | 2013 (1198; 3225)                  | 1    |
|              | 1         | 259821                | 5901             | 1615              | 40656                    | 1108                     | 222343        | 2640        | 1716       | 372              | 17 (-489; 754)                     | 5    |
|              | 1.5       | 218477                | 5244             | 1220              | 30698                    | 837                      | 190966        | 1992        | 1294       | 44               | -221 (-612; 337)                   | 7    |
|              | 2         | 185520                | 4718             | 944               | 23761                    | 648                      | 164886        | 1540        | 1000       | -142             | -340 (-655; 96)                    | 9    |
|              | 4         | 106114                | 3477             | 823               | 20706                    | 564                      | 87498         | 1327        | 870        | 434              | 277 (-11; 663)                     | 4    |
| *65 %        | 4         | 1128369               | 0                | 25520             | 638799                   | 17568                    | 1810256       | 42313       | 28370      | 69650            | 64413 (56625; 75829)               |      |

\*Baseline intervention; values reported as absolute gains and losses.

\*\*optimal intervention.

**Table S48: Very severe pandemic influenza with R<sub>0</sub>=1.8: costs and benefits associated with each sick leave intervention relative to the baseline, assuming 65% of children and 55% of adults are symptomatic, and with extra mixing.**

| Intervention |           | Mean costs (1000 USD) |                  |                   |                          |                          | Mean benefits |             |            | Output measures  |                                    |      |
|--------------|-----------|-----------------------|------------------|-------------------|--------------------------|--------------------------|---------------|-------------|------------|------------------|------------------------------------|------|
| % on leave   | Max. days | Productivity losses   | Cost of campaign | GP-visits avoided | Hospitalisations avoided | Medication costs avoided | Total costs   | QALYs saved | YPLL saved | Mean NHB (QALYs) | Median NHB (0.25; 0.75 percentile) | Rank |
| 65 %         | 0.5       | 231511                | 3226             | 1081              | 27205                    | 742                      | 205709        | 1739        | 1138       | -359             | -585 (-922; -103)                  | 5    |
|              | 1         | 196730                | 2409             | 464               | 11685                    | 319                      | 186671        | 746         | 488        | -1157            | -1252 (-1400; -1043)               | 11   |
|              | 1.5       | 133807                | 1756             | 233               | 5858                     | 160                      | 129313        | 374         | 245        | -945             | -990 (-1067; -885)                 | 7    |
|              | 2         | 86698                 | 1234             | 71                | 1793                     | 49                       | 86018         | 114         | 75         | -763             | -775 (-802; -740)                  | 6    |
| 80 %         | 0.5       | 322409                | 5277             | 1778              | 44765                    | 1221                     | 279921        | 2887        | 1867       | 33               | -366 (-904; 437)                   | 2    |
|              | 1         | 299832                | 4456             | 996               | 25083                    | 684                      | 277525        | 1616        | 1043       | -1215            | -1435 (-1745; -983)                | 14   |
|              | 1.5       | 235800                | 3799             | 704               | 17716                    | 483                      | 220697        | 1140        | 736        | -1111            | -1262 (-1491; -943)                | 10   |
|              | 2         | 187169                | 3274             | 501               | 12611                    | 344                      | 176986        | 811         | 523        | -994             | -1096 (-1270; -861)                | 8    |
| 90 %         | 4         | 92706                 | 2033             | 412               | 10368                    | 283                      | 83675         | 658         | 429        | -195             | -269 (-423; -68)                   | 3    |
|              | **0.5     | 375711                | 6722             | 2260              | 56901                    | 1552                     | 321719        | 3669        | 2371       | 388              | -113 (-813; 911)                   | 1    |
|              | 1         | 363556                | 5901             | 1362              | 34288                    | 935                      | 332871        | 2208        | 1425       | -1187            | -1482 (-1922; -861)                | 13   |
|              | 1.5       | 299609                | 5244             | 1028              | 25869                    | 706                      | 277250        | 1664        | 1074       | -1163            | -1378 (-1724; -902)                | 12   |
| *65 %        | 2         | 250601                | 4718             | 795               | 20021                    | 546                      | 233956        | 1287        | 830        | -1099            | -1255 (-1541; -879)                | 9    |
|              | 4         | 151412                | 3477             | 693               | 17456                    | 476                      | 136264        | 1109        | 722        | -281             | -406 (-665; -70)                   | 4    |
| *65 %        | 4         | 1327752               | 0                | 30070             | 752708                   | 20735                    | 2131265       | 49646       | 33177      | 81900            | 75719 (66559; 89137)               |      |

\*Baseline intervention; values reported as absolute gains and losses.

\*\*optimal intervention.

Section III: Scenarios with low symptomatic proportion (35% children, and 25% adults assumed to be symptomatic), without assuming extra mixing

## A. Seasonal influenza

### i. Epidemiology ( $R_{eff} = 1.2, 1.3, 1.4$ )

**Table S49: Seasonal influenza with  $R_{eff}=1.2$ : number of avoided cases, GP-visits, hospitalizations, and deaths associated with each sick leave intervention, assuming 35% of children and 25% adults are symptomatic, and no extra mixing.**

| Intervention |            | Median (0.25; 0.75 percentiles) relative to baseline |                   |                      |                             |                        |                | Mean                                          |
|--------------|------------|------------------------------------------------------|-------------------|----------------------|-----------------------------|------------------------|----------------|-----------------------------------------------|
| % on leave   | Delay time | Symptomatic cases avoided                            | % Reduction in AR | GP-visits avoided    | Hospital admissions avoided | ICU admissions avoided | Avoided Deaths | workdays lost (proportion lost to caregiving) |
| 65%          | 0.5        | 21168                                                | 13 %              | 3164 (2692; 3686)    | 152 (64; 300)               | 15 (6; 30)             | 32 (17; 48)    | 231460 (0.4)                                  |
|              | 1          | 9297                                                 | 6 %               | 1390 (1183; 1619)    | 67 (28; 132)                | 7 (3; 13)              | 14 (7; 21)     | 232881 (0.43)                                 |
|              | 1.5        | 4706                                                 | 3 %               | 703 (599; 820)       | 34 (14; 67)                 | 3 (1; 7)               | 7 (4; 11)      | 223381 (0.46)                                 |
|              | 2          | 1450                                                 | 1 %               | 217 (184; 253)       | 10 (4; 21)                  | 1 (0; 2)               | 2 (1; 3)       | 215745 (0.49)                                 |
| 80%          | 0.5        | 30777                                                | 19 %              | 4600 (3915; 5360)    | 222 (93; 437)               | 22 (9; 44)             | 47 (24; 70)    | 244870 (0.36)                                 |
|              | 1          | 16952                                                | 11 %              | 2534 (2156; 2952)    | 122 (51; 240)               | 12 (5; 24)             | 26 (13; 38)    | 250016 (0.38)                                 |
|              | 1.5        | 11580                                                | 7 %               | 1731 (1473; 2017)    | 83 (35; 164)                | 8 (3; 17)              | 18 (9; 26)     | 240089 (0.41)                                 |
|              | 2          | 7771                                                 | 5 %               | 1162 (988; 1353)     | 56 (24; 110)                | 6 (2; 11)              | 12 (6; 18)     | 231823 (0.44)                                 |
| 90%          | 4          | 6078                                                 | 4 %               | 909 (773; 1058)      | 44 (18; 86)                 | 4 (2; 9)               | 9 (5; 14)      | 212613 (0.48)                                 |
|              | 0.5        | 37052                                                | 23 %              | 5538 (4713; 6452)    | 267 (112; 526)              | 26 (11; 53)            | 56 (29; 84)    | 251376 (0.34)                                 |
|              | 1          | 21984                                                | 14 %              | 3286 (2796; 3828)    | 158 (67; 312)               | 16 (6; 32)             | 33 (17; 50)    | 259646 (0.36)                                 |
|              | 1.5        | 16101                                                | 10 %              | 2407 (2048; 2804)    | 116 (49; 228)               | 11 (5; 23)             | 24 (13; 36)    | 249798 (0.39)                                 |
| *65 %        | 2          | 11950                                                | 7 %               | 1786 (1520; 2081)    | 86 (36; 169)                | 9 (4; 17)              | 18 (10; 27)    | 241336 (0.41)                                 |
|              | 4          | 10079                                                | 6 %               | 1507 (1282; 1755)    | 73 (31; 143)                | 7 (3; 14)              | 15 (8; 23)     | 220600 (0.45)                                 |
| *65 %        | 4          | 161436                                               |                   | 24131 (20534; 28113) | 1163 (490; 2290)            | 115 (47; 231)          | 245 (128; 365) | 199201 (0.53)                                 |

\* This is the baseline intervention; values are reported in absolute terms, and not in terms of avoided cases.

**Table S50: Seasonal influenza with  $R_{eff}=1.3$ : number of avoided cases, GP-visits, hospitalizations, and deaths associated with each sick leave intervention, assuming 35% of children and 25% adults are symptomatic, and no extra mixing.**

| Intervention |            | Median (0.25; 0.75 percentiles) relative to baseline |                   |                      |                             |                        |                | Mean                                          |
|--------------|------------|------------------------------------------------------|-------------------|----------------------|-----------------------------|------------------------|----------------|-----------------------------------------------|
| % on leave   | Delay time | Symptomatic cases avoided                            | % Reduction in AR | GP-visits avoided    | Hospital admissions avoided | ICU admissions avoided | Avoided Deaths | workdays lost (proportion lost to caregiving) |
| 65%          | 0.5        | 20313                                                | 8 %               | 3036 (2584; 3537)    | 146 (62; 288)               | 15 (6; 29)             | 31 (16; 46)    | 407271 (0.39)                                 |
|              | 1          | 8906                                                 | 3 %               | 1331 (1133; 1551)    | 64 (27; 126)                | 6 (3; 13)              | 14 (7; 20)     | 394594 (0.42)                                 |
|              | 1.5        | 4491                                                 | 2 %               | 671 (571; 782)       | 32 (14; 64)                 | 3 (1; 6)               | 7 (4; 10)      | 373047 (0.45)                                 |
|              | 2          | 1375                                                 | 1 %               | 206 (175; 239)       | 10 (4; 20)                  | 1 (0; 2)               | 2 (1; 3)       | 356648 (0.47)                                 |
| 80%          | 0.5        | 30150                                                | 11 %              | 4507 (3835; 5250)    | 217 (91; 428)               | 22 (9; 43)             | 46 (24; 68)    | 445416 (0.35)                                 |
|              | 1          | 16658                                                | 6 %               | 2490 (2119; 2901)    | 120 (51; 236)               | 12 (5; 24)             | 25 (13; 38)    | 433907 (0.37)                                 |
|              | 1.5        | 11447                                                | 4 %               | 1711 (1456; 1993)    | 82 (35; 162)                | 8 (3; 16)              | 17 (9; 26)     | 409391 (0.4)                                  |
|              | 2          | 7757                                                 | 3 %               | 1159 (987; 1351)     | 56 (24; 110)                | 6 (2; 11)              | 12 (6; 18)     | 390515 (0.42)                                 |
| 90%          | 4          | 6114                                                 | 2 %               | 914 (778; 1065)      | 44 (19; 87)                 | 4 (2; 9)               | 9 (5; 14)      | 355611 (0.47)                                 |
|              | 0.5        | 36620                                                | 14 %              | 5474 (4658; 6377)    | 264 (111; 519)              | 26 (11; 53)            | 56 (29; 83)    | 468005 (0.32)                                 |
|              | 1          | 21804                                                | 8 %               | 3259 (2773; 3797)    | 157 (66; 309)               | 16 (6; 31)             | 33 (17; 49)    | 458047 (0.35)                                 |
|              | 1.5        | 16044                                                | 6 %               | 2398 (2041; 2794)    | 116 (49; 228)               | 11 (5; 23)             | 24 (13; 36)    | 432007 (0.37)                                 |
| *65%         | 2          | 11986                                                | 4 %               | 1792 (1525; 2087)    | 86 (36; 170)                | 9 (4; 17)              | 18 (10; 27)    | 411741 (0.4)                                  |
|              | 4          | 10177                                                | 4 %               | 1521 (1294; 1772)    | 73 (31; 144)                | 7 (3; 15)              | 15 (8; 23)     | 373426 (0.44)                                 |
|              |            | 266712                                               |                   | 39867 (33924; 46445) | 1921 (809; 3783)            | 190 (78; 382)          | 404 (212; 603) | 327228 (0.52)                                 |

\* This is the baseline intervention; values are reported in absolute terms, and not in terms of avoided cases.

**Table S51: Seasonal influenza with  $R_{eff}=1.4$ : number of avoided cases, GP-visits, hospitalizations, and deaths associated with each sick leave intervention, assuming 35% of children and 25% adults are symptomatic, and no extra mixing.**

| Intervention |            | Median (0.25; 0.75 percentiles) relative to baseline |                   |                      |                             |                        |                | Mean                                          |
|--------------|------------|------------------------------------------------------|-------------------|----------------------|-----------------------------|------------------------|----------------|-----------------------------------------------|
| % on leave   | Delay time | Symptomatic cases avoided                            | % Reduction in AR | GP-visits avoided    | Hospital admissions avoided | ICU admissions avoided | Avoided Deaths | workdays lost (proportion lost to caregiving) |
| 65%          | 0.5        | 19242                                                | 5 %               | 2876 (2447; 3351)    | 139 (58; 273)               | 14 (6; 28)             | 29 (15; 43)    | 557257 (0.38)                                 |
|              | 1          | 8415                                                 | 2 %               | 1258 (1070; 1465)    | 61 (26; 119)                | 6 (2; 12)              | 13 (7; 19)     | 531830 (0.41)                                 |
|              | 1.5        | 4241                                                 | 1 %               | 634 (539; 739)       | 31 (13; 60)                 | 3 (1; 6)               | 6 (3; 10)      | 499550 (0.44)                                 |
|              | 2          | 1298                                                 | 0 %               | 194 (165; 226)       | 9 (4; 18)                   | 1 (0; 2)               | 2 (1; 3)       | 475380 (0.46)                                 |
| 80%          | 0.5        | 28983                                                | 8 %               | 4332 (3686; 5047)    | 209 (88; 411)               | 21 (9; 42)             | 44 (23; 66)    | 617943 (0.34)                                 |
|              | 1          | 16051                                                | 5 %               | 2399 (2042; 2795)    | 116 (49; 228)               | 11 (5; 23)             | 24 (13; 36)    | 591107 (0.36)                                 |
|              | 1.5        | 11063                                                | 3 %               | 1654 (1407; 1927)    | 80 (34; 157)                | 8 (3; 16)              | 17 (9; 25)     | 553533 (0.39)                                 |
|              | 2          | 7556                                                 | 2 %               | 1129 (961; 1316)     | 54 (23; 107)                | 5 (2; 11)              | 11 (6; 17)     | 525160 (0.41)                                 |
| 90%          | 4          | 5974                                                 | 2 %               | 893 (760; 1040)      | 43 (18; 85)                 | 4 (2; 9)               | 9 (5; 14)      | 476368 (0.46)                                 |
|              | 0.5        | 35449                                                | 10 %              | 5299 (4509; 6173)    | 255 (107; 503)              | 25 (10; 51)            | 54 (28; 80)    | 655287 (0.31)                                 |
|              | 1          | 21126                                                | 6 %               | 3158 (2687; 3679)    | 152 (64; 300)               | 15 (6; 30)             | 32 (17; 48)    | 628440 (0.34)                                 |
|              | 1.5        | 15603                                                | 4 %               | 2332 (1985; 2717)    | 112 (47; 221)               | 11 (5; 22)             | 24 (12; 35)    | 587794 (0.36)                                 |
| *65%         | 2          | 11698                                                | 3 %               | 1749 (1488; 2037)    | 84 (35; 166)                | 8 (3; 17)              | 18 (9; 26)     | 556959 (0.39)                                 |
|              | 4          | 9969                                                 | 3 %               | 1490 (1268; 1736)    | 72 (30; 141)                | 7 (3; 14)              | 15 (8; 23)     | 503047 (0.43)                                 |
|              |            | 356072                                               |                   | 53224 (45290; 62007) | 2565 (1080; 5050)           | 254 (105; 511)         | 540 (283; 805) | 434619 (0.51)                                 |

\* This is the baseline intervention; values are reported in absolute terms, and not in terms of avoided cases.

ii. Costs and effects (R\_eff = 1.2, 1.3, 1.4)

Table S52: Seasonal influenza with R\_eff=1.2: costs and benefits associated with each sick leave intervention relative to the baseline, assuming 35% of children and 25% of adults are symptomatic, and no extra mixing.

| Intervention |           | Mean costs (1000 USD) |                  |                   |                          |                          | Mean benefits |             |            | Output measures  |                                    |      |
|--------------|-----------|-----------------------|------------------|-------------------|--------------------------|--------------------------|---------------|-------------|------------|------------------|------------------------------------|------|
| % on leave   | Max. days | Productivity losses   | Cost of campaign | GP-visits avoided | Hospitalisations avoided | Medication costs avoided | Total costs   | QALYs saved | YPLL saved | Mean NHB (QALYs) | Median NHB (0.25; 0.75 percentile) | Rank |
| 65 %         | 0.5       | 6626                  | 3227             | 217               | 1692                     | 225                      | 7721          | 330         | 83         | 251              | 158 (75; 307)                      | 3    |
|              | 1         | 10185                 | 2411             | 95                | 743                      | 99                       | 11659         | 145         | 36         | 26               | -15 (-51; 51)                      | 12   |
|              | 1.5       | 7817                  | 1757             | 48                | 376                      | 50                       | 9100          | 73          | 18         | -19              | -40 (-59; -6)                      | 13   |
|              | 2         | 5803                  | 1234             | 15                | 116                      | 15                       | 6892          | 23          | 6          | -48              | -54 (-60; -43)                     | 14   |
| 80 %         | 0.5       | 4275                  | 5276             | 315               | 2477                     | 327                      | 6432          | 488         | 120        | 423              | 278 (162; 501)                     | 2    |
|              | 1         | 9821                  | 4456             | 174               | 1365                     | 180                      | 12559         | 269         | 66         | 141              | 61 (-3; 185)                       | 5    |
|              | 1.5       | 7909                  | 3799             | 119               | 932                      | 123                      | 10535         | 184         | 45         | 76               | 22 (-22; 106)                      | 10   |
|              | 2         | 6136                  | 3274             | 80                | 626                      | 82                       | 8622          | 123         | 30         | 35               | -1 (-31; 55)                       | 11   |
|              | 4         | 43                    | 2034             | 62                | 486                      | 65                       | 1465          | 95          | 24         | 80               | 53 (29; 96)                        | 9    |
| 90 %         | **0.5     | 2281                  | 6721             | 379               | 2982                     | 393                      | 5247          | 588         | 145        | 535              | 361 (220; 630)                     | 1    |
|              | 1         | 9248                  | 5901             | 225               | 1770                     | 233                      | 12921         | 349         | 86         | 217              | 114 (31; 274)                      | 4    |
|              | 1.5       | 7706                  | 5244             | 165               | 1296                     | 171                      | 11319         | 255         | 63         | 140              | 65 (3; 182)                        | 6    |
|              | 2         | 6128                  | 4719             | 122               | 962                      | 127                      | 9637          | 190         | 47         | 91               | 36 (-10; 122)                      | 8    |
|              | 4         | -103                  | 3479             | 103               | 805                      | 107                      | 2361          | 157         | 39         | 133              | 89 (49; 160)                       | 7    |
| *65 %        | 4         | 77809                 | 0                | 1652              | 12841                    | 1715                     | 94017         | 2522        | 632        | 3844             | 3127 (2506; 4285)                  |      |

\*Baseline intervention; values reported as absolute gains and losses.

\*\*optimal intervention.

**Table S53: Seasonal influenza with R<sub>eff</sub>=1.3: costs and benefits associated with each sick leave intervention relative to the baseline, assuming 35% of children and 25% of adults are symptomatic, and no extra mixing.**

| Intervention |           | Mean costs (1000 USD) |                  |                   |                          |                          | Mean benefits |             |            | Output measures  |                                    |      |
|--------------|-----------|-----------------------|------------------|-------------------|--------------------------|--------------------------|---------------|-------------|------------|------------------|------------------------------------|------|
| % on leave   | Max. days | Productivity losses   | Cost of campaign | GP-visits avoided | Hospitalisations avoided | Medication costs avoided | Total costs   | QALYs saved | YPLL saved | Mean NHB (QALYs) | Median NHB (0.25; 0.75 percentile) | Rank |
| 65 %         | 0.5       | 24396                 | 3227             | 208               | 1623                     | 216                      | 25577         | 316         | 79         | 56               | -35 (-113; 109)                    | 4    |
|              | 1         | 22741                 | 2411             | 91                | 712                      | 95                       | 24254         | 139         | 35         | -109             | -148 (-183; -84)                   | 14   |
|              | 1.5       | 15890                 | 1757             | 46                | 359                      | 48                       | 17195         | 70          | 17         | -105             | -125 (-143; -93)                   | 13   |
|              | 2         | 10614                 | 1234             | 14                | 110                      | 15                       | 11710         | 21          | 5          | -98              | -104 (-110; -94)                   | 12   |
| 80 %         | 0.5       | 26897                 | 5276             | 309               | 2427                     | 320                      | 29117         | 478         | 117        | 181              | 39 (-74; 257)                      | 2    |
|              | 1         | 26834                 | 4456             | 171               | 1341                     | 177                      | 29602         | 264         | 65         | -38              | -116 (-179; 5)                     | 9    |
|              | 1.5       | 19957                 | 3799             | 117               | 921                      | 122                      | 22596         | 181         | 44         | -49              | -102 (-146; -19)                   | 10   |
|              | 2         | 14572                 | 3274             | 79                | 624                      | 82                       | 17060         | 123         | 30         | -51              | -87 (-117; -31)                    | 11   |
|              | 4         | 3124                  | 2034             | 63                | 489                      | 65                       | 4542          | 95          | 24         | 49               | 22 (-2; 66)                        | 5    |
| 90 %         | **0.5     | 28026                 | 6721             | 375               | 2948                     | 389                      | 31036         | 581         | 142        | 264              | 92 (-46; 358)                      | 1    |
|              | 1         | 29149                 | 5901             | 223               | 1755                     | 232                      | 32840         | 346         | 85         | 11               | -91 (-174; 67)                     | 6    |
|              | 1.5       | 22352                 | 5244             | 164               | 1291                     | 170                      | 25970         | 254         | 62         | -10              | -85 (-147; 31)                     | 7    |
|              | 2         | 16942                 | 4719             | 123               | 965                      | 127                      | 20447         | 190         | 46         | -19              | -74 (-121; 13)                     | 8    |
|              | 4         | 4977                  | 3479             | 104               | 813                      | 108                      | 7431          | 158         | 39         | 83               | 39 (-3; 111)                       | 3    |
| *65 %        | 4         | 127726                | 0                | 2730              | 21215                    | 2835                     | 154506        | 4165        | 1041       | 6354             | 5171 (4145; 7083)                  |      |

\*Baseline intervention; values reported as absolute gains and losses.

\*\*optimal intervention.



**Table S54: Seasonal influenza with R\_eff=1.4: costs and benefits associated with each sick leave intervention relative to the baseline, assuming 35% of children and 25% of adults are symptomatic, and no extra mixing.**

| Intervention |           | Mean costs (1000 USD) |                  |                   |                          |                          | Mean benefits |             |            | Output measures  |                                    |      |
|--------------|-----------|-----------------------|------------------|-------------------|--------------------------|--------------------------|---------------|-------------|------------|------------------|------------------------------------|------|
| % on leave   | Max. days | Productivity losses   | Cost of campaign | GP-visits avoided | Hospitalisations avoided | Medication costs avoided | Total costs   | QALYs saved | YPLL saved | Mean NHB (QALYs) | Median NHB (0.25; 0.75 percentile) | Rank |
| 65 %         | 0.5       | 40373                 | 3227             | 197               | 1538                     | 205                      | 41661         | 300         | 75         | -125             | -211 (-285; -74)                   | 6    |
|              | 1         | 33921                 | 2411             | 86                | 672                      | 89                       | 35484         | 131         | 33         | -231             | -268 (-301; -208)                  | 14   |
|              | 1.5       | 23045                 | 1757             | 43                | 339                      | 45                       | 24375         | 66          | 16         | -183             | -201 (-218; -170)                  | 11   |
|              | 2         | 14853                 | 1234             | 13                | 104                      | 14                       | 15957         | 20          | 5          | -143             | -147 (-154; -138)                  | 8    |
| 80 %         | 0.5       | 47498                 | 5276             | 297               | 2333                     | 308                      | 49836         | 459         | 112        | -49              | -186 (-295; 25)                    | 4    |
|              | 1         | 42165                 | 4456             | 164               | 1292                     | 171                      | 44993         | 254         | 62         | -205             | -280 (-341; -163)                  | 13   |
|              | 1.5       | 30808                 | 3799             | 113               | 891                      | 118                      | 33486         | 175         | 43         | -166             | -218 (-260; -138)                  | 10   |
|              | 2         | 22159                 | 3274             | 77                | 608                      | 80                       | 24668         | 120         | 29         | -132             | -167 (-196; -112)                  | 7    |
|              | **4       | 5959                  | 2034             | 61                | 477                      | 63                       | 7391          | 93          | 23         | 18               | -8 (-32; 35)                       | 2    |
| 90 %         | 0.5       | 51616                 | 6721             | 363               | 2853                     | 377                      | 54744         | 562         | 137        | 3                | -163 (-297; 94)                    | 3    |
|              | 1         | 47210                 | 5901             | 216               | 1701                     | 225                      | 50970         | 335         | 82         | -185             | -283 (-365; -130)                  | 12   |
|              | 1.5       | 35625                 | 5244             | 160               | 1256                     | 166                      | 39288         | 247         | 60         | -153             | -226 (-286; -112)                  | 9    |
|              | 2         | 26756                 | 4719             | 120               | 942                      | 124                      | 30290         | 185         | 45         | -124             | -177 (-223; -92)                   | 5    |
|              | 4         | 9690                  | 3479             | 102               | 797                      | 106                      | 12165         | 155         | 39         | 31               | -12 (-52; 60)                      | 1    |
| *65 %        | 4         | 169550                | 0                | 3645              | 28322                    | 3787                     | 205305        | 5558        | 1387       | 8486             | 6908 (5538; 9453)                  |      |

\*Baseline intervention; values reported as absolute gains and losses.  
\*\*optimal intervention.

## B. Moderate pandemic

### i. Epidemiology ( $R_0 = 1.4, 1.6, 1.8$ )

**Table S55: Moderate pandemic influenza with  $R_0=1.4$ : number of avoided cases, GP-visits, hospitalizations, and deaths associated with each sick leave intervention, assuming 35% of children and 25% adults are symptomatic, and no extra mixing.**

| Intervention |            | Median (0.25; 0.75 percentiles) relative to baseline |                   |                      |                             |                        |                 | Mean workdays lost (proportion lost to caregiving) |
|--------------|------------|------------------------------------------------------|-------------------|----------------------|-----------------------------|------------------------|-----------------|----------------------------------------------------|
| % on leave   | Delay time | Symptomatic cases avoided                            | % Reduction in AR | GP-visits avoided    | Hospital admissions avoided | ICU admissions avoided | Avoided Deaths  |                                                    |
| 65%          | 0.5        | 28133                                                | 6 %               | 4205 (3578; 4899)    | 203 (85; 399)               | 20 (8; 40)             | 43 (22; 64)     | 1076456 (0.22)                                     |
|              | 1          | 12265                                                | 3 %               | 1833 (1560; 2136)    | 88 (37; 174)                | 9 (4; 18)              | 19 (10; 28)     | 1053779 (0.23)                                     |
|              | 1.5        | 6175                                                 | 1 %               | 923 (785; 1075)      | 44 (19; 88)                 | 4 (2; 9)               | 9 (5; 14)       | 1012289 (0.24)                                     |
|              | 2          | 1884                                                 | 0 %               | 282 (240; 328)       | 14 (6; 27)                  | 1 (1; 3)               | 3 (1; 4)        | 980937 (0.25)                                      |
| 80%          | 0.5        | 44537                                                | 9 %               | 6657 (5665; 7756)    | 321 (135; 632)              | 32 (13; 64)            | 68 (35; 101)    | 1219745 (0.19)                                     |
|              | 1          | 25243                                                | 5 %               | 3773 (3211; 4396)    | 182 (77; 358)               | 18 (7; 36)             | 38 (20; 57)     | 1203434 (0.2)                                      |
|              | 1.5        | 17842                                                | 4 %               | 2667 (2269; 3107)    | 129 (54; 253)               | 13 (5; 26)             | 27 (14; 40)     | 1157635 (0.21)                                     |
|              | 2          | 12635                                                | 3 %               | 1889 (1607; 2200)    | 91 (38; 179)                | 9 (4; 18)              | 19 (10; 29)     | 1122532 (0.22)                                     |
|              | 4          | 10336                                                | 2 %               | 1545 (1315; 1800)    | 74 (31; 147)                | 7 (3; 15)              | 16 (8; 23)      | 1054556 (0.23)                                     |
| 90%          | 0.5        | 55533                                                | 12 %              | 8301 (7063; 9671)    | 400 (168; 788)              | 40 (16; 80)            | 84 (44; 126)    | 1305850 (0.17)                                     |
|              | 1          | 33934                                                | 7 %               | 5072 (4316; 5909)    | 244 (103; 481)              | 24 (10; 49)            | 51 (27; 77)     | 1296232 (0.18)                                     |
|              | 1.5        | 25661                                                | 5 %               | 3836 (3264; 4469)    | 185 (78; 364)               | 18 (8; 37)             | 39 (20; 58)     | 1248656 (0.19)                                     |
|              | 2          | 19823                                                | 4 %               | 2963 (2521; 3452)    | 143 (60; 281)               | 14 (6; 28)             | 30 (16; 45)     | 1211813 (0.2)                                      |
|              | 4          | 17252                                                | 4 %               | 2579 (2194; 3004)    | 124 (52; 245)               | 12 (5; 25)             | 26 (14; 39)     | 1137472 (0.21)                                     |
| *65%         | 4          | 472571                                               |                   | 70638 (60108; 82294) | 3404 (1433; 6703)           | 337 (139; 678)         | 717 (376; 1068) | 923389 (0.27)                                      |

\* This is the baseline intervention; values are reported in absolute terms, and not in terms of avoided cases.

**Table S56: Moderate pandemic influenza with  $R_0=1.6$ : number of avoided cases, GP-visits, hospitalizations, and deaths associated with each sick leave intervention, assuming 35% of children and 25% adults are symptomatic, and no extra mixing.**

| Intervention |            | Median (0.25; 0.75 percentiles) relative to baseline |                   |                       |                             |                        |                 | Mean workdays lost (proportion lost to caregiving) |
|--------------|------------|------------------------------------------------------|-------------------|-----------------------|-----------------------------|------------------------|-----------------|----------------------------------------------------|
| % on leave   | Delay time | Symptomatic cases avoided                            | % Reduction in AR | GP-visits avoided     | Hospital admissions avoided | ICU admissions avoided | Avoided Deaths  |                                                    |
| 65%          | 0.5        | 23911                                                | 4 %               | 3574 (3041; 4164)     | 172 (73; 339)               | 17 (7; 34)             | 36 (19; 54)     | 1536654 (0.21)                                     |
|              | 1          | 10397                                                | 2 %               | 1554 (1322; 1811)     | 75 (32; 147)                | 7 (3; 15)              | 16 (8; 24)      | 1481925 (0.22)                                     |
|              | 1.5        | 5229                                                 | 1 %               | 782 (665; 911)        | 38 (16; 74)                 | 4 (2; 7)               | 8 (4; 12)       | 1415092 (0.23)                                     |
|              | 2          | 1603                                                 | 0 %               | 240 (204; 279)        | 12 (5; 23)                  | 1 (0; 2)               | 2 (1; 4)        | 1365492 (0.24)                                     |
| 80%          | 0.5        | 38383                                                | 6 %               | 5737 (4882; 6684)     | 276 (116; 544)              | 27 (11; 55)            | 58 (31; 87)     | 1771175 (0.18)                                     |
|              | 1          | 21735                                                | 3 %               | 3249 (2765; 3785)     | 157 (66; 308)               | 16 (6; 31)             | 33 (17; 49)     | 1715061 (0.19)                                     |
|              | 1.5        | 15399                                                | 2 %               | 2302 (1959; 2682)     | 111 (47; 218)               | 11 (5; 22)             | 23 (12; 35)     | 1637765 (0.2)                                      |
|              | 2          | 10938                                                | 2 %               | 1635 (1391; 1905)     | 79 (33; 155)                | 8 (3; 16)              | 17 (9; 25)      | 1580026 (0.21)                                     |
| 90%          | 4          | 8976                                                 | 1 %               | 1342 (1142; 1563)     | 65 (27; 127)                | 6 (3; 13)              | 14 (7; 20)      | 1480115 (0.22)                                     |
|              | 0.5        | 48157                                                | 7 %               | 7198 (6125; 8386)     | 347 (146; 683)              | 34 (14; 69)            | 73 (38; 109)    | 1918403 (0.16)                                     |
|              | 1          | 29392                                                | 4 %               | 4393 (3738; 5118)     | 212 (89; 417)               | 21 (9; 42)             | 45 (23; 66)     | 1863824 (0.17)                                     |
|              | 1.5        | 22247                                                | 3 %               | 3325 (2830; 3874)     | 160 (67; 316)               | 16 (7; 32)             | 34 (18; 50)     | 1780683 (0.18)                                     |
| *65%         | 2          | 17229                                                | 3 %               | 2575 (2191; 3000)     | 124 (52; 244)               | 12 (5; 25)             | 26 (14; 39)     | 1718213 (0.19)                                     |
|              | 4          | 15009                                                | 2 %               | 2243 (1909; 2614)     | 108 (46; 213)               | 11 (4; 22)             | 23 (12; 34)     | 1607837 (0.2)                                      |
|              |            | 655087                                               |                   | 97920 (83322; 114077) | 4718 (1986; 9291)           | 468 (193; 939)         | 993 (521; 1481) | 1282188 (0.26)                                     |

\* This is the baseline intervention; values are reported in absolute terms, and not in terms of avoided cases.

**Table S57: Moderate pandemic influenza with R<sub>0</sub>=1.8: number of avoided cases, GP-visits, hospitalizations, and deaths associated with each sick leave intervention, assuming 35% of children and 25% adults are symptomatic, and no extra mixing.**

| Intervention |            |                           |                   | Median (0.25; 0.75 percentiles) relative to baseline |                             |                        |                  |                | Mean workdays lost (proportion lost to caregiving) |
|--------------|------------|---------------------------|-------------------|------------------------------------------------------|-----------------------------|------------------------|------------------|----------------|----------------------------------------------------|
| % on leave   | Delay time | Symptomatic cases avoided | % Reduction in AR | GP-visits avoided                                    | Hospital admissions avoided | ICU admissions avoided | Avoided Deaths   |                |                                                    |
| 65%          | 0.5        | 20231                     | 3 %               | 3024 (2573; 3523)                                    | 146 (61; 287)               | 14 (6; 29)             | 31 (16; 46)      | 1875814 (0.2)  |                                                    |
|              | 1          | 8773                      | 1 %               | 1311 (1116; 1528)                                    | 63 (27; 124)                | 6 (3; 13)              | 13 (7; 20)       | 1421509 (0.24) |                                                    |
|              | 1.5        | 4406                      | 1 %               | 659 (560; 767)                                       | 32 (13; 62)                 | 3 (1; 6)               | 7 (4; 10)        | 1663384 (0.23) |                                                    |
|              | 2          | 1353                      | 0 %               | 202 (172; 236)                                       | 10 (4; 19)                  | 1 (0; 2)               | 2 (1; 3)         | 1292273 (0.27) |                                                    |
| 80%          | 0.5        | 32770                     | 4 %               | 4898 (4168; 5707)                                    | 236 (99; 465)               | 23 (10; 47)            | 50 (26; 74)      | 1904160 (0.19) |                                                    |
|              | 1          | 18536                     | 2 %               | 2771 (2358; 3228)                                    | 134 (56; 263)               | 13 (5; 27)             | 28 (15; 42)      | 1535194 (0.22) |                                                    |
|              | 1.5        | 13145                     | 2 %               | 1965 (1672; 2289)                                    | 95 (40; 186)                | 9 (4; 19)              | 20 (10; 30)      | 1604236 (0.22) |                                                    |
|              | 2          | 9360                      | 1 %               | 1399 (1191; 1630)                                    | 67 (28; 133)                | 7 (3; 13)              | 14 (7; 21)       | 1329505 (0.25) |                                                    |
| 90%          | 4          | 7686                      | 1 %               | 1149 (978; 1338)                                     | 55 (23; 109)                | 5 (2; 11)              | 12 (6; 17)       | 1700244 (0.22) |                                                    |
|              | 0.5        | 41299                     | 5 %               | 6173 (5253; 7192)                                    | 297 (125; 586)              | 29 (12; 59)            | 63 (33; 93)      | 2214420 (0.16) |                                                    |
|              | 1          | 25159                     | 3 %               | 3761 (3200; 4381)                                    | 181 (76; 357)               | 18 (7; 36)             | 38 (20; 57)      | 1747129 (0.19) |                                                    |
|              | 1.5        | 19046                     | 2 %               | 2847 (2423; 3317)                                    | 137 (58; 270)               | 14 (6; 27)             | 29 (15; 43)      | 1802544 (0.19) |                                                    |
| *65 %        | 2          | 14779                     | 2 %               | 2209 (1880; 2574)                                    | 106 (45; 210)               | 11 (4; 21)             | 22 (12; 33)      | 1482638 (0.22) |                                                    |
|              | 4          | 12882                     | 2 %               | 1926 (1639; 2243)                                    | 93 (39; 183)                | 9 (4; 18)              | 20 (10; 29)      | 1887420 (0.2)  |                                                    |
|              |            |                           |                   | 117899 (100323; 137353)                              | 5681 (2392; 11187)          | 563 (232; 1131)        | 1196 (627; 1783) | 1543947 (0.25) |                                                    |

\* This is the baseline intervention; values are reported in absolute terms, and not in terms of avoided cases.

ii. Costs and effects (R\_0 = 1.4, 1.6, 1.8)

Table S58: Moderate pandemic influenza with R\_0=1.4: costs and benefits associated with each sick leave intervention relative to the baseline, assuming 35% of children and 25% of adults are symptomatic, and no extra mixing.

| Intervention |           | Mean costs (1000 USD) |                  |                   |                          |                          | Mean benefits |             |            | Output measures  |                                    |      |
|--------------|-----------|-----------------------|------------------|-------------------|--------------------------|--------------------------|---------------|-------------|------------|------------------|------------------------------------|------|
| % on leave   | Max. days | Productivity losses   | Cost of campaign | GP-visits avoided | Hospitalisations avoided | Medication costs avoided | Total costs   | QALYs saved | YPLL saved | Mean NHB (QALYs) | Median NHB (0.25; 0.75 percentile) | Rank |
| 65 %         | 0.5       | 39715                 | 3227             | 288               | 2248                     | 300                      | 40106         | 446         | 116        | 37               | -88 (-197; 112)                    | 3    |
|              | 1         | 41059                 | 2411             | 126               | 980                      | 131                      | 42233         | 194         | 51         | -236             | -290 (-338; -203)                  | 14   |
|              | 1.5       | 29349                 | 1757             | 63                | 493                      | 66                       | 30484         | 98          | 25         | -213             | -240 (-264; -196)                  | 10   |
|              | 2         | 20311                 | 1234             | 19                | 151                      | 20                       | 21356         | 30          | 8          | -188             | -195 (-204; -182)                  | 7    |
| 80 %         | 0.5       | 51917                 | 5276             | 456               | 3585                     | 474                      | 52678         | 718         | 183        | 181              | -26 (-197; 296)                    | 2    |
|              | 1         | 58528                 | 4456             | 258               | 2032                     | 269                      | 60425         | 407         | 104        | -209             | -326 (-424; -142)                  | 8    |
|              | 1.5       | 47571                 | 3799             | 183               | 1436                     | 190                      | 49561         | 288         | 73         | -218             | -298 (-370; -170)                  | 12   |
|              | 2         | 38890                 | 3274             | 129               | 1017                     | 135                      | 40883         | 204         | 52         | -213             | -269 (-321; -176)                  | 11   |
|              | 4         | 17144                 | 2034             | 106               | 826                      | 110                      | 18137         | 164         | 42         | -21              | -63 (-108; 12)                     | 4    |
| 90 %         | **0.5     | 58093                 | 6721             | 568               | 4470                     | 591                      | 59185         | 896         | 228        | 292              | 35 (-179; 437)                     | 1    |
|              | 1         | 68718                 | 5901             | 347               | 2731                     | 361                      | 71179         | 547         | 139        | -179             | -333 (-468; -87)                   | 6    |
|              | 1.5       | 58487                 | 5244             | 263               | 2066                     | 273                      | 61130         | 413         | 105        | -210             | -323 (-428; -136)                  | 9    |
|              | 2         | 50206                 | 4719             | 203               | 1596                     | 211                      | 52915         | 319         | 81         | -220             | -306 (-389; -161)                  | 13   |
|              | 4         | 27626                 | 3479             | 177               | 1379                     | 184                      | 29367         | 273         | 70         | -26              | -97 (-172; 28)                     | 5    |
| *65 %        | 4         | 353389                | 0                | 4837              | 37589                    | 5034                     | 400849        | 7563        | 2015       | 14249            | 12167 (10343; 15533)               |      |

\*Baseline intervention; values reported as absolute gains and losses.

\*\*optimal intervention.

**Table S59: Moderate pandemic influenza with R<sub>0</sub>=1.6: costs and benefits associated with each sick leave intervention relative to the baseline, assuming 35% of children and 25% of adults are symptomatic, and no extra mixing.**

| Intervention |           | Mean costs (1000 USD) |                  |                   |                          |                          | Mean benefits |             |            | Output measures  |                                    |      |
|--------------|-----------|-----------------------|------------------|-------------------|--------------------------|--------------------------|---------------|-------------|------------|------------------|------------------------------------|------|
| % on leave   | Max. days | Productivity losses   | Cost of campaign | GP-visits avoided | Hospitalisations avoided | Medication costs avoided | Total costs   | QALYs saved | YPLL saved | Mean NHB (QALYs) | Median NHB (0.25; 0.75 percentile) | Rank |
| 65 %         | 0.5       | 79499                 | 3227             | 245               | 1911                     | 255                      | 80316         | 377         | 96         | -442             | -547 (-640; -378)                  | 5    |
|              | 1         | 67826                 | 2411             | 106               | 831                      | 111                      | 69189         | 164         | 42         | -542             | -586 (-628; -511)                  | 8    |
|              | 1.5       | 46225                 | 1757             | 54                | 418                      | 56                       | 47455         | 82          | 21         | -401             | -423 (-445; -385)                  | 4    |
|              | 2         | 30062                 | 1234             | 16                | 128                      | 17                       | 31135         | 25          | 6          | -292             | -298 (-307; -285)                  | 2    |
| 80 %         | 0.5       | 112034                | 5276             | 393               | 3090                     | 409                      | 113418        | 616         | 154        | -541             | -719 (-866; -440)                  | 7    |
|              | 1         | 103854                | 4456             | 222               | 1750                     | 232                      | 106106        | 349         | 87         | -733             | -832 (-918; -674)                  | 12   |
|              | 1.5       | 81632                 | 3799             | 158               | 1240                     | 164                      | 83870         | 247         | 62         | -608             | -675 (-739; -563)                  | 10   |
|              | 2         | 64859                 | 3274             | 112               | 880                      | 117                      | 67024         | 175         | 44         | -508             | -553 (-603; -472)                  | 6    |
|              | **4       | 32045                 | 2034             | 92                | 717                      | 96                       | 33174         | 141         | 36         | -197             | -229 (-276; -162)                  | 1    |
| 90 %         | 0.5       | 131722                | 6721             | 493               | 3876                     | 514                      | 133561        | 773         | 193        | -589             | -810 (-999; -460)                  | 9    |
|              | 1         | 126402                | 5901             | 301               | 2366                     | 313                      | 129323        | 471         | 118        | -848             | -975 (-1097; -761)                 | 14   |
|              | 1.5       | 104030                | 5244             | 228               | 1791                     | 237                      | 107019        | 357         | 89         | -735             | -828 (-926; -665)                  | 13   |
|              | 2         | 86989                 | 4719             | 176               | 1387                     | 184                      | 89961         | 276         | 69         | -641             | -708 (-792; -581)                  | 11   |
|              | 4         | 52487                 | 3479             | 154               | 1199                     | 160                      | 54453         | 236         | 60         | -319             | -373 (-450; -261)                  | 3    |
| *65 %        | 4         | 490524                | 0                | 6705              | 52107                    | 6990                     | 556325        | 10461       | 2766       | 19797            | 16907 (14381; 21582)               |      |

\*Baseline intervention; values reported as absolute gains and losses.

\*\*optimal intervention.

**Table S60: Moderate pandemic influenza with R\_0=1.8: costs and benefits associated with each sick leave intervention relative to the baseline, assuming 35% of children and 25% of adults are symptomatic, and no extra mixing.**

| Intervention |           | Mean costs (1000 USD) |                  |                   |                          |                          | Mean benefits |             |            | Output measures  |                                    |      |
|--------------|-----------|-----------------------|------------------|-------------------|--------------------------|--------------------------|---------------|-------------|------------|------------------|------------------------------------|------|
| % on leave   | Max. days | Productivity losses   | Cost of campaign | GP-visits avoided | Hospitalisations avoided | Medication costs avoided | Total costs   | QALYs saved | YPLL saved | Mean NHB (QALYs) | Median NHB (0.25; 0.75 percentile) | Rank |
| 65 %         | 0.5       | 110428                | 3227             | 207               | 1617                     | 216                      | 111616        | 318         | 80         | -820             | -908 (-988; -764)                  | 10   |
|              | 1         | 64386                 | 2411             | 90                | 701                      | 94                       | 65912         | 138         | 35         | -534             | -572 (-607; -508)                  | 7    |
|              | 1.5       | 57056                 | 1757             | 45                | 352                      | 47                       | 58369         | 69          | 17         | -526             | -543 (-563; -511)                  | 6    |
|              | **2       | 27672                 | 1234             | 14                | 108                      | 14                       | 28770         | 21          | 5          | -272             | -277 (-284; -266)                  | 1    |
| 80 %         | 0.5       | 130317                | 5276             | 335               | 2638                     | 350                      | 132270        | 524         | 129        | -825             | -977 (-1104; -737)                 | 11   |
|              | 1         | 89774                 | 4456             | 190               | 1492                     | 198                      | 92349         | 296         | 73         | -646             | -730 (-803; -595)                  | 9    |
|              | 1.5       | 80299                 | 3799             | 135               | 1058                     | 140                      | 82765         | 210         | 52         | -634             | -691 (-746; -594)                  | 8    |
|              | 2         | 50866                 | 3274             | 96                | 753                      | 100                      | 53191         | 149         | 37         | -393             | -431 (-474; -363)                  | 3    |
|              | 4         | 40505                 | 2034             | 79                | 614                      | 82                       | 41765         | 120         | 30         | -305             | -330 (-376; -269)                  | 2    |
| 90 %         | 0.5       | 171447                | 6721             | 423               | 3324                     | 441                      | 173981        | 660         | 163        | -1114            | -1298 (-1466; -998)                | 14   |
|              | 1         | 117496                | 5901             | 258               | 2025                     | 269                      | 120845        | 402         | 99         | -831             | -940 (-1044; -756)                 | 13   |
|              | 1.5       | 107828                | 5244             | 195               | 1533                     | 204                      | 111141        | 304         | 75         | -829             | -907 (-994; -766)                  | 12   |
|              | 2         | 71049                 | 4719             | 151               | 1190                     | 158                      | 74270         | 236         | 58         | -522             | -580 (-650; -471)                  | 5    |
|              | 4         | 68532                 | 3479             | 132               | 1029                     | 138                      | 70713         | 202         | 50         | -519             | -560 (-638; -457)                  | 4    |
| *65 %        | 4         | 590564                | 0                | 8073              | 62738                    | 8429                     | 669804        | 12573       | 3304       | 23861            | 20379 (17341; 26010)               |      |

\*Baseline intervention; values reported as absolute gains and losses.  
\*\*optimal intervention.

## C. Severe pandemic

### i. Epidemiology ( $R_0 = 1.4, 1.6, 1.8$ )

**Table S61: Severe pandemic influenza with  $R_0=1.4$ : number of avoided cases, GP-visits, hospitalizations, and deaths associated with each sick leave intervention, assuming 35% of children and 25% adults are symptomatic, and no extra mixing.**

| Intervention |            | Median (0.25; 0.75 percentiles) relative to baseline |                   |                       |                             |                        |                  |                | Mean workdays lost (proportion lost to caregiving) |
|--------------|------------|------------------------------------------------------|-------------------|-----------------------|-----------------------------|------------------------|------------------|----------------|----------------------------------------------------|
| % on leave   | Delay time | Symptomatic cases avoided                            | % Reduction in AR | GP-visits avoided     | Hospital admissions avoided | ICU admissions avoided | Avoided Deaths   |                |                                                    |
| 65%          | 0.5        | 28133                                                | 6 %               | 5612 (4902; 6382)     | 554 (338; 848)              | 94 (56; 146)           | 63 (33; 94)      | 1076454 (0.22) |                                                    |
|              | 1          | 12265                                                | 3 %               | 2447 (2137; 2782)     | 241 (147; 370)              | 41 (25; 64)            | 27 (14; 41)      | 1053777 (0.23) |                                                    |
|              | 1.5        | 6175                                                 | 1 %               | 1232 (1076; 1401)     | 122 (74; 186)               | 21 (12; 32)            | 14 (7; 21)       | 1012287 (0.24) |                                                    |
|              | 2          | 1884                                                 | 0 %               | 376 (328; 427)        | 37 (23; 57)                 | 6 (4; 10)              | 4 (2; 6)         | 980935 (0.25)  |                                                    |
| 80%          | 0.5        | 44537                                                | 9 %               | 8884 (7761; 10103)    | 876 (535; 1343)             | 149 (89; 231)          | 100 (52; 148)    | 1219743 (0.19) |                                                    |
|              | 1          | 25243                                                | 5 %               | 5035 (4399; 5726)     | 497 (303; 761)              | 84 (51; 131)           | 56 (30; 84)      | 1203432 (0.2)  |                                                    |
|              | 1.5        | 17842                                                | 4 %               | 3559 (3109; 4047)     | 351 (214; 538)              | 60 (36; 92)            | 40 (21; 59)      | 1157633 (0.21) |                                                    |
|              | 2          | 12635                                                | 3 %               | 2520 (2202; 2866)     | 249 (152; 381)              | 42 (25; 65)            | 28 (15; 42)      | 1122530 (0.22) |                                                    |
|              | 4          | 10336                                                | 2 %               | 2062 (1801; 2345)     | 203 (124; 312)              | 34 (21; 54)            | 23 (12; 34)      | 1054554 (0.23) |                                                    |
| 90%          | 0.5        | 55533                                                | 12 %              | 11077 (9677; 12597)   | 1093 (668; 1675)            | 185 (111; 288)         | 124 (65; 185)    | 1305848 (0.17) |                                                    |
|              | 1          | 33934                                                | 7 %               | 6769 (5913; 7698)     | 668 (408; 1023)             | 113 (68; 176)          | 76 (40; 113)     | 1296230 (0.18) |                                                    |
|              | 1.5        | 25661                                                | 5 %               | 5119 (4471; 5821)     | 505 (308; 774)              | 86 (51; 133)           | 57 (30; 86)      | 1248654 (0.19) |                                                    |
|              | 2          | 19823                                                | 4 %               | 3954 (3454; 4497)     | 390 (238; 598)              | 66 (40; 103)           | 44 (23; 66)      | 1211811 (0.2)  |                                                    |
|              | 4          | 17252                                                | 4 %               | 3441 (3006; 3914)     | 340 (207; 520)              | 58 (35; 89)            | 39 (20; 58)      | 1137470 (0.21) |                                                    |
| *65%         | 4          | 472571                                               |                   | 94264 (82347; 107200) | 9300 (5681; 14253)          | 1577 (948; 2448)       | 1057 (555; 1576) | 923387 (0.27)  |                                                    |

\* This is the baseline intervention; values are reported in absolute terms, and not in terms of avoided cases.



**Table S62: Severe pandemic influenza with R<sub>0</sub>=1.6: number of avoided cases, GP-visits, hospitalizations, and deaths associated with each sick leave intervention, assuming 35% of children and 25% adults are symptomatic, and no extra mixing.**

| Intervention |            | Median (0.25; 0.75 percentiles) relative to baseline |                   |                         |                             |                        |                  |                | Mean workdays lost (proportion lost to caregiving) |
|--------------|------------|------------------------------------------------------|-------------------|-------------------------|-----------------------------|------------------------|------------------|----------------|----------------------------------------------------|
| % on leave   | Delay time | Symptomatic cases avoided                            | % Reduction in AR | GP-visits avoided       | Hospital admissions avoided | ICU admissions avoided | Avoided Deaths   |                |                                                    |
| 65%          | 0.5        | 23911                                                | 4 %               | 4770 (4167; 5424)       | 471 (287; 721)              | 80 (48; 124)           | 53 (28; 80)      | 1536651 (0.21) |                                                    |
|              | 1          | 10397                                                | 2 %               | 2074 (1812; 2358)       | 205 (125; 314)              | 35 (21; 54)            | 23 (12; 35)      | 1481923 (0.22) |                                                    |
|              | 1.5        | 5229                                                 | 1 %               | 1043 (911; 1186)        | 103 (63; 158)               | 17 (10; 27)            | 12 (6; 17)       | 1415090 (0.23) |                                                    |
|              | 2          | 1603                                                 | 0 %               | 320 (279; 364)          | 32 (19; 48)                 | 5 (3; 8)               | 4 (2; 5)         | 1365490 (0.24) |                                                    |
| 80%          | 0.5        | 38383                                                | 6 %               | 7656 (6688; 8707)       | 755 (461; 1158)             | 128 (77; 199)          | 86 (45; 128)     | 1771173 (0.18) |                                                    |
|              | 1          | 21735                                                | 3 %               | 4336 (3787; 4930)       | 428 (261; 656)              | 73 (44; 113)           | 49 (26; 72)      | 1715059 (0.19) |                                                    |
|              | 1.5        | 15399                                                | 2 %               | 3072 (2683; 3493)       | 303 (185; 464)              | 51 (31; 80)            | 34 (18; 51)      | 1637762 (0.2)  |                                                    |
|              | 2          | 10938                                                | 2 %               | 2182 (1906; 2481)       | 215 (131; 330)              | 36 (22; 57)            | 24 (13; 36)      | 1580023 (0.21) |                                                    |
| 90%          | 4          | 8976                                                 | 1 %               | 1790 (1564; 2036)       | 177 (108; 271)              | 30 (18; 46)            | 20 (11; 30)      | 1480112 (0.22) |                                                    |
|              | 0.5        | 48157                                                | 7 %               | 9606 (8391; 10924)      | 948 (579; 1452)             | 161 (97; 249)          | 108 (57; 161)    | 1918401 (0.16) |                                                    |
|              | 1          | 29392                                                | 4 %               | 5863 (5122; 6667)       | 578 (353; 886)              | 98 (59; 152)           | 66 (34; 98)      | 1863821 (0.17) |                                                    |
|              | 1.5        | 22247                                                | 3 %               | 4438 (3877; 5047)       | 438 (267; 671)              | 74 (45; 115)           | 50 (26; 74)      | 1780681 (0.18) |                                                    |
| *65%         | 2          | 17229                                                | 3 %               | 3437 (3002; 3908)       | 339 (207; 520)              | 57 (35; 89)            | 39 (20; 57)      | 1718211 (0.19) |                                                    |
|              | 4          | 15009                                                | 2 %               | 2994 (2615; 3405)       | 295 (180; 453)              | 50 (30; 78)            | 34 (18; 50)      | 1607834 (0.2)  |                                                    |
|              | 4          | 655087                                               |                   | 130671 (114150; 148602) | 12892 (7875; 19757)         | 2186 (1314; 3393)      | 1465 (769; 2184) | 1282185 (0.26) |                                                    |

\* This is the baseline intervention; values are reported in absolute terms, and not in terms of avoided cases.

**Table S63: Severe pandemic influenza with R<sub>0</sub>=1.8: number of avoided cases, GP-visits, hospitalizations, and deaths associated with each sick leave intervention, assuming 35% of children and 25% adults are symptomatic, and no extra mixing.**

| Intervention |            | Median (0.25; 0.75 percentiles) relative to baseline |                   |                         |                             |                        |                  | Mean workdays lost (proportion lost to caregiving) |
|--------------|------------|------------------------------------------------------|-------------------|-------------------------|-----------------------------|------------------------|------------------|----------------------------------------------------|
| % on leave   | Delay time | Symptomatic cases avoided                            | % Reduction in AR | GP-visits avoided       | Hospital admissions avoided | ICU admissions avoided | Avoided Deaths   |                                                    |
| 65%          | 0.5        | 20231                                                | 3 %               | 4035 (3525; 4589)       | 398 (243; 610)              | 67 (41; 105)           | 45 (24; 67)      | 1875811 (0.2)                                      |
|              | 1          | 8773                                                 | 1 %               | 1750 (1529; 1990)       | 173 (105; 265)              | 29 (18; 45)            | 20 (10; 29)      | 1421506 (0.24)                                     |
|              | 1.5        | 4406                                                 | 1 %               | 879 (768; 999)          | 87 (53; 133)                | 15 (9; 23)             | 10 (5; 15)       | 1663381 (0.23)                                     |
|              | 2          | 1353                                                 | 0 %               | 270 (236; 307)          | 27 (16; 41)                 | 5 (3; 7)               | 3 (2; 5)         | 1292270 (0.27)                                     |
| 80%          | 0.5        | 32770                                                | 4 %               | 6537 (5710; 7434)       | 645 (394; 988)              | 109 (66; 170)          | 73 (38; 109)     | 1904157 (0.19)                                     |
|              | 1          | 18536                                                | 2 %               | 3697 (3230; 4205)       | 365 (223; 559)              | 62 (37; 96)            | 41 (22; 62)      | 1535191 (0.22)                                     |
|              | 1.5        | 13145                                                | 2 %               | 2622 (2291; 2982)       | 259 (158; 396)              | 44 (26; 68)            | 29 (15; 44)      | 1604234 (0.22)                                     |
|              | 2          | 9360                                                 | 1 %               | 1867 (1631; 2123)       | 184 (113; 282)              | 31 (19; 48)            | 21 (11; 31)      | 1329502 (0.25)                                     |
| 90%          | 4          | 7686                                                 | 1 %               | 1533 (1339; 1744)       | 151 (92; 232)               | 26 (15; 40)            | 17 (9; 26)       | 1700241 (0.22)                                     |
|              | 0.5        | 41299                                                | 5 %               | 8238 (7196; 9368)       | 813 (496; 1246)             | 138 (83; 214)          | 92 (48; 138)     | 2214417 (0.16)                                     |
|              | 1          | 25159                                                | 3 %               | 5018 (4384; 5707)       | 495 (302; 759)              | 84 (50; 130)           | 56 (30; 84)      | 1747127 (0.19)                                     |
|              | 1.5        | 19046                                                | 2 %               | 3799 (3319; 4320)       | 375 (229; 574)              | 64 (38; 99)            | 43 (22; 64)      | 1802541 (0.19)                                     |
| *65%         | 2          | 14779                                                | 2 %               | 2948 (2575; 3353)       | 291 (178; 446)              | 49 (30; 77)            | 33 (17; 49)      | 1482635 (0.22)                                     |
|              | 4          | 12882                                                | 2 %               | 2570 (2245; 2922)       | 254 (155; 389)              | 43 (26; 67)            | 29 (15; 43)      | 1887417 (0.2)                                      |
|              |            | 788750                                               |                   | 157333 (137442; 178923) | 15523 (9482; 23789)         | 2632 (1582; 4086)      | 1764 (926; 2630) | 1543944 (0.25)                                     |

\* This is the baseline intervention; values are reported in absolute terms, and not in terms of avoided cases.

ii. Costs and effects (R\_0 = 1.4, 1.6, 1.8)

Table S64: Severe pandemic influenza with R\_0=1.4: costs and benefits associated with each sick leave intervention relative to the baseline, assuming 35% of children and 25% of adults are symptomatic, and no extra mixing.

| Intervention |           | Mean costs (1000 USD) |                  |                   |                          |                          | Mean benefits |             |            | Output measures  |                                    |      |
|--------------|-----------|-----------------------|------------------|-------------------|--------------------------|--------------------------|---------------|-------------|------------|------------------|------------------------------------|------|
| % on leave   | Max. days | Productivity losses   | Cost of campaign | GP-visits avoided | Hospitalisations avoided | Medication costs avoided | Total costs   | QALYs saved | YPLL saved | Mean NHB (QALYs) | Median NHB (0.25; 0.75 percentile) | Rank |
| 65 %         | 0.5       | 39711                 | 3228             | 384               | 6409                     | 314                      | 35831         | 496         | 171        | 131              | 9 (-107; 215)                      | 3    |
|              | 1         | 41055                 | 2411             | 167               | 2794                     | 137                      | 40367         | 216         | 75         | -196             | -248 (-299; -160)                  | 14   |
|              | 1.5       | 29347                 | 1757             | 84                | 1407                     | 69                       | 29544         | 109         | 38         | -192             | -218 (-244; -174)                  | 13   |
|              | 2         | 20309                 | 1235             | 26                | 429                      | 21                       | 21068         | 33          | 11         | -182             | -189 (-198; -175)                  | 12   |
| 80 %         | 0.5       | 51912                 | 5275             | 608               | 10178                    | 498                      | 45903         | 798         | 270        | 330              | 126 (-54; 453)                     | 2    |
|              | 1         | 58523                 | 4455             | 345               | 5769                     | 282                      | 56582         | 452         | 153        | -125             | -238 (-343; -55)                   | 8    |
|              | 1.5       | 47565                 | 3799             | 244               | 4077                     | 199                      | 46843         | 319         | 108        | -158             | -237 (-313; -107)                  | 10   |
|              | 2         | 38884                 | 3274             | 173               | 2887                     | 141                      | 38957         | 226         | 76         | -171             | -225 (-281; -133)                  | 11   |
|              | 4         | 17155                 | 2034             | 141               | 2355                     | 116                      | 16578         | 182         | 62         | 13               | -27 (-76; 48)                      | 5    |
| 90 %         | **0.5     | 58083                 | 6720             | 758               | 12691                    | 621                      | 50734         | 995         | 337        | 477              | 227 (-2; 631)                      | 1    |
|              | 1         | 68708                 | 5900             | 463               | 7755                     | 379                      | 66011         | 607         | 205        | -66              | -215 (-359; 31)                    | 6    |
|              | 1.5       | 58477                 | 5244             | 350               | 5864                     | 287                      | 57219         | 459         | 155        | -124             | -235 (-347; -49)                   | 7    |
|              | 2         | 50195                 | 4719             | 271               | 4530                     | 222                      | 49892         | 355         | 120        | -154             | -237 (-327; -93)                   | 9    |
|              | 4         | 27643                 | 3480             | 236               | 3930                     | 193                      | 26764         | 303         | 104        | 30               | -37 (-117; 89)                     | 4    |
| *65 %        | 4         | 353389                | 0                | 6452              | 107683                   | 5285                     | 472808        | 8422        | 2972       | 15843            | 13847 (11912; 17264)               |      |

\*Baseline intervention; values reported as absolute gains and losses.

\*\*optimal intervention.

**Table S65: Severe pandemic influenza with R<sub>0</sub>=1.6: costs and benefits associated with each sick leave intervention relative to the baseline, assuming 35% of children and 25% of adults are symptomatic, and no extra mixing.**

| Intervention |           | Mean costs (1000 USD) |                  |                   |                          |                          | Mean benefits |             |            | Output measures  |                                    |      |
|--------------|-----------|-----------------------|------------------|-------------------|--------------------------|--------------------------|---------------|-------------|------------|------------------|------------------------------------|------|
| % on leave   | Max. days | Productivity losses   | Cost of campaign | GP-visits avoided | Hospitalisations avoided | Medication costs avoided | Total costs   | QALYs saved | YPLL saved | Mean NHB (QALYs) | Median NHB (0.25; 0.75 percentile) | Rank |
| 65 %         | 0.5       | 79493                 | 3228             | 326               | 5447                     | 268                      | 76679         | 419         | 142        | -363             | -466 (-564; -294)                  | 4    |
|              | 1         | 67820                 | 2411             | 142               | 2369                     | 116                      | 67604         | 182         | 62         | -507             | -550 (-595; -475)                  | 9    |
|              | 1.5       | 46221                 | 1757             | 71                | 1191                     | 59                       | 46657         | 92          | 31         | -384             | -405 (-428; -367)                  | 5    |
|              | 2         | 30059                 | 1235             | 22                | 365                      | 18                       | 30889         | 28          | 10         | -287             | -292 (-301; -280)                  | 3    |
| 80 %         | 0.5       | 112027                | 5275             | 524               | 8771                     | 430                      | 107577        | 683         | 227        | -414             | -588 (-746; -309)                  | 6    |
|              | 1         | 103847                | 4455             | 297               | 4967                     | 243                      | 102795        | 386         | 128        | -662             | -758 (-850; -600)                  | 13   |
|              | 1.5       | 81624                 | 3799             | 210               | 3519                     | 172                      | 81521         | 274         | 91         | -558             | -623 (-691; -511)                  | 10   |
|              | 2         | 64851                 | 3274             | 149               | 2500                     | 122                      | 65354         | 194         | 64         | -472             | -515 (-569; -434)                  | 8    |
|              | **4       | 32059                 | 2034             | 123               | 2045                     | 100                      | 31825         | 157         | 53         | -168             | -199 (-247; -131)                  | 1    |
| 90 %         | 0.5       | 131708                | 6720             | 657               | 11005                    | 539                      | 126227        | 857         | 285        | -431             | -643 (-847; -294)                  | 7    |
|              | 1         | 126388                | 5900             | 401               | 6717                     | 329                      | 124841        | 522         | 174        | -751             | -875 (-1005; -662)                 | 14   |
|              | 1.5       | 104016                | 5244             | 304               | 5084                     | 249                      | 103623        | 395         | 131        | -661             | -751 (-856; -589)                  | 12   |
|              | 2         | 86975                 | 4719             | 235               | 3937                     | 193                      | 87328         | 306         | 101        | -585             | -650 (-738; -521)                  | 11   |
|              | 4         | 52510                 | 3480             | 205               | 3419                     | 168                      | 52197         | 262         | 88         | -270             | -323 (-403; -208)                  | 2    |
| *65 %        | 4         | 490525                | 0                | 8944              | 149272                   | 7338                     | 656078        | 11642       | 4080       | 21996            | 19236 (16545; 23959)               |      |

\*Baseline intervention; values reported as absolute gains and losses.

\*\*optimal intervention.

**Table S66: Severe pandemic influenza with R\_0=1.8: costs and benefits associated with each sick leave intervention relative to the baseline, assuming 35% of children and 25% of adults are symptomatic, and no extra mixing.**

| Intervention |           | Mean costs (1000 USD) |                  |                   |                          |                          | Mean benefits |             |            | Output measures  |                                    |      |
|--------------|-----------|-----------------------|------------------|-------------------|--------------------------|--------------------------|---------------|-------------|------------|------------------|------------------------------------|------|
| % on leave   | Max. days | Productivity losses   | Cost of campaign | GP-visits avoided | Hospitalisations avoided | Medication costs avoided | Total costs   | QALYs saved | YPLL saved | Mean NHB (QALYs) | Median NHB (0.25; 0.75 percentile) | Rank |
| 65 %         | 0.5       | 110419                | 3228             | 276               | 4609                     | 227                      | 108535        | 352         | 118        | -755             | -840 (-925; -693)                  | 12   |
|              | 1         | 64381                 | 2411             | 120               | 1999                     | 98                       | 64575         | 153         | 51         | -506             | -542 (-580; -478)                  | 6    |
|              | 1.5       | 57051                 | 1757             | 60                | 1004                     | 49                       | 57695         | 77          | 26         | -512             | -528 (-549; -496)                  | 7    |
|              | **2       | 27669                 | 1235             | 18                | 308                      | 15                       | 28562         | 24          | 8          | -268             | -272 (-280; -261)                  | 2    |
| 80 %         | 0.5       | 130310                | 5275             | 447               | 7489                     | 368                      | 127281        | 580         | 190        | -718             | -865 (-1002; -627)                 | 10   |
|              | 1         | 89768                 | 4455             | 253               | 4236                     | 208                      | 89525         | 328         | 108        | -585             | -666 (-746; -532)                  | 8    |
|              | 1.5       | 80292                 | 3799             | 179               | 3004                     | 147                      | 80759         | 232         | 76         | -591             | -646 (-706; -550)                  | 9    |
|              | 2         | 50860                 | 3274             | 128               | 2139                     | 105                      | 51762         | 165         | 54         | -363             | -399 (-445; -330)                  | 3    |
|              | 4         | 40521                 | 2034             | 105               | 1751                     | 86                       | 40613         | 133         | 44         | -281             | -305 (-353; -242)                  | 1    |
| 90 %         | 0.5       | 171432                | 6720             | 564               | 9438                     | 463                      | 167687        | 731         | 240        | -979             | -1159 (-1338; -860)                | 14   |
|              | 1         | 117483                | 5900             | 343               | 5749                     | 282                      | 117008        | 445         | 146        | -748             | -854 (-967; -671)                  | 11   |
|              | 1.5       | 107814                | 5244             | 260               | 4352                     | 214                      | 108232        | 337         | 110        | -767             | -842 (-935; -702)                  | 13   |
|              | 2         | 71037                 | 4719             | 202               | 3377                     | 166                      | 72012         | 261         | 85         | -473             | -530 (-605; -420)                  | 4    |
|              | 4         | 68559                 | 3480             | 176               | 2935                     | 145                      | 68783         | 223         | 74         | -478             | -518 (-598; -413)                  | 5    |
| *65 %        | 4         | 590566                | 0                | 10769             | 179729                   | 8849                     | 789912        | 13984       | 4873       | 26498            | 23174 (19932; 28853)               |      |

\*Baseline intervention; values reported as absolute gains and losses.  
 \*\*optimal intervention.

## D. Very severe pandemic

### i. Epidemiology ( $R_0 = 1.4, 1.6, 1.8$ )

**Table S67: Very severe pandemic influenza with  $R_0=1.4$ : number of avoided cases, GP-visits, hospitalizations, and deaths associated with each sick leave intervention, assuming 35% of children and 25% adults are symptomatic, and no extra mixing.**

| Intervention |            | Median (0.25; 0.75 percentiles) relative to baseline |                   |                         |                             |                        |                   |                | Mean workdays lost (proportion lost to caregiving) |
|--------------|------------|------------------------------------------------------|-------------------|-------------------------|-----------------------------|------------------------|-------------------|----------------|----------------------------------------------------|
| % on leave   | Delay time | Symptomatic cases avoided                            | % Reduction in AR | GP-visits avoided       | Hospital admissions avoided | ICU admissions avoided | Avoided Deaths    |                |                                                    |
| 65%          | 0.5        | 28133                                                | 6 %               | 7019 (6248; 7847)       | 975 (680; 1351)             | 243 (167; 341)         | 196 (103; 292)    | 1076450 (0.22) |                                                    |
|              | 1          | 12265                                                | 3 %               | 3060 (2724; 3421)       | 425 (297; 589)              | 106 (73; 149)          | 86 (45; 127)      | 1053773 (0.23) |                                                    |
|              | 1.5        | 6175                                                 | 1 %               | 1541 (1371; 1722)       | 214 (149; 296)              | 53 (37; 75)            | 43 (23; 64)       | 1012284 (0.24) |                                                    |
|              | 2          | 1884                                                 | 0 %               | 470 (418; 525)          | 65 (46; 90)                 | 16 (11; 23)            | 13 (7; 20)        | 980932 (0.25)  |                                                    |
| 80%          | 0.5        | 44537                                                | 9 %               | 11112 (9891; 12422)     | 1544 (1077; 2138)           | 385 (264; 540)         | 310 (163; 462)    | 1219739 (0.19) |                                                    |
|              | 1          | 25243                                                | 5 %               | 6298 (5606; 7041)       | 875 (610; 1212)             | 218 (150; 306)         | 176 (92; 262)     | 1203429 (0.2)  |                                                    |
|              | 1.5        | 17842                                                | 4 %               | 4452 (3962; 4976)       | 619 (431; 857)              | 154 (106; 217)         | 124 (65; 185)     | 1157630 (0.21) |                                                    |
|              | 2          | 12635                                                | 3 %               | 3152 (2806; 3524)       | 438 (306; 607)              | 109 (75; 153)          | 88 (46; 131)      | 1122526 (0.22) |                                                    |
|              | 4          | 10336                                                | 2 %               | 2579 (2295; 2883)       | 358 (250; 496)              | 89 (61; 125)           | 72 (38; 107)      | 1054551 (0.23) |                                                    |
| 90%          | 0.5        | 55533                                                | 12 %              | 13856 (12333; 15489)    | 1925 (1343; 2666)           | 480 (330; 674)         | 387 (203; 576)    | 1305845 (0.17) |                                                    |
|              | 1          | 33934                                                | 7 %               | 8467 (7536; 9465)       | 1176 (821; 1629)            | 293 (201; 412)         | 237 (124; 352)    | 1296227 (0.18) |                                                    |
|              | 1.5        | 25661                                                | 5 %               | 6403 (5699; 7157)       | 890 (621; 1232)             | 222 (152; 311)         | 179 (94; 266)     | 1248650 (0.19) |                                                    |
|              | 2          | 19823                                                | 4 %               | 4946 (4402; 5529)       | 687 (479; 952)              | 171 (118; 241)         | 138 (72; 206)     | 1211808 (0.2)  |                                                    |
|              | 4          | 17252                                                | 4 %               | 4304 (3831; 4812)       | 598 (417; 828)              | 149 (102; 209)         | 120 (63; 179)     | 1137467 (0.21) |                                                    |
| *65%         | 4          | 472571                                               |                   | 117909 (104951; 131806) | 16384 (11427; 22688)        | 4085 (2806; 5735)      | 3295 (1726; 4904) | 923383 (0.27)  |                                                    |

\* This is the baseline intervention; values are reported in absolute terms, and not in terms of avoided cases.

**Table S68: Very severe pandemic influenza with R<sub>0</sub>=1.6: number of avoided cases, GP-visits, hospitalizations, and deaths associated with each sick leave intervention, assuming 35% of children and 25% adults are symptomatic, and no extra mixing.**

| Intervention |            | Median (0.25; 0.75 percentiles) relative to baseline |                   |                         |                             |                        |                   | Mean workdays lost (proportion lost to caregiving) |
|--------------|------------|------------------------------------------------------|-------------------|-------------------------|-----------------------------|------------------------|-------------------|----------------------------------------------------|
| % on leave   | Delay time | Symptomatic cases avoided                            | % Reduction in AR | GP-visits avoided       | Hospital admissions avoided | ICU admissions avoided | Avoided Deaths    |                                                    |
| 65%          | 0.5        | 23911                                                | 4 %               | 5966 (5310; 6669)       | 829 (578; 1148)             | 207 (142; 290)         | 167 (87; 248)     | 1536646 (0.21)                                     |
|              | 1          | 10397                                                | 2 %               | 2594 (2309; 2900)       | 360 (251; 499)              | 90 (62; 126)           | 72 (38; 108)      | 1481918 (0.22)                                     |
|              | 1.5        | 5229                                                 | 1 %               | 1305 (1161; 1458)       | 181 (126; 251)              | 45 (31; 63)            | 36 (19; 54)       | 1415085 (0.23)                                     |
|              | 2          | 1603                                                 | 0 %               | 400 (356; 447)          | 56 (39; 77)                 | 14 (10; 19)            | 11 (6; 17)        | 1365485 (0.24)                                     |
| 80%          | 0.5        | 38383                                                | 6 %               | 9577 (8524; 10706)      | 1331 (928; 1843)            | 332 (228; 466)         | 268 (140; 398)    | 1771168 (0.18)                                     |
|              | 1          | 21735                                                | 3 %               | 5423 (4827; 6062)       | 754 (526; 1044)             | 188 (129; 264)         | 152 (79; 226)     | 1715054 (0.19)                                     |
|              | 1.5        | 15399                                                | 2 %               | 3842 (3420; 4295)       | 534 (372; 739)              | 133 (91; 187)          | 107 (56; 160)     | 1637757 (0.2)                                      |
|              | 2          | 10938                                                | 2 %               | 2729 (2429; 3051)       | 379 (264; 525)              | 95 (65; 133)           | 76 (40; 114)      | 1580018 (0.21)                                     |
| 90%          | 4          | 8976                                                 | 1 %               | 2240 (1993; 2504)       | 311 (217; 431)              | 78 (53; 109)           | 63 (33; 93)       | 1480107 (0.22)                                     |
|              | 0.5        | 48157                                                | 7 %               | 12015 (10695; 13432)    | 1670 (1164; 2312)           | 416 (286; 584)         | 336 (176; 500)    | 1918396 (0.16)                                     |
|              | 1          | 29392                                                | 4 %               | 7333 (6528; 8198)       | 1019 (711; 1411)            | 254 (175; 357)         | 205 (107; 305)    | 1863816 (0.17)                                     |
|              | 1.5        | 22247                                                | 3 %               | 5551 (4941; 6205)       | 771 (538; 1068)             | 192 (132; 270)         | 155 (81; 231)     | 1780676 (0.18)                                     |
| *65%         | 2          | 17229                                                | 3 %               | 4299 (3826; 4805)       | 597 (417; 827)              | 149 (102; 209)         | 120 (63; 179)     | 1718206 (0.19)                                     |
|              | 4          | 15009                                                | 2 %               | 3745 (3333; 4186)       | 520 (363; 721)              | 130 (89; 182)          | 105 (55; 156)     | 1607829 (0.2)                                      |
|              |            | 655087                                               |                   | 163448 (145485; 182713) | 22711 (15841; 31451)        | 5662 (3890; 7950)      | 4567 (2392; 6798) | 1282181 (0.26)                                     |

\* This is the baseline intervention; values are reported in absolute terms, and not in terms of avoided cases.

**Table S69: Very severe pandemic influenza with R<sub>0</sub>=1.8: number of avoided cases, GP-visits, hospitalizations, and deaths associated with each sick leave intervention, assuming 35% of children and 25% adults are symptomatic, and no extra mixing.**

| Intervention |            | Median (0.25; 0.75 percentiles) relative to baseline |                   |                         |                             |                        |                   |                | Mean workdays lost (proportion lost to caregiving) |
|--------------|------------|------------------------------------------------------|-------------------|-------------------------|-----------------------------|------------------------|-------------------|----------------|----------------------------------------------------|
| % on leave   | Delay time | Symptomatic cases avoided                            | % Reduction in AR | GP-visits avoided       | Hospital admissions avoided | ICU admissions avoided | Avoided Deaths    |                |                                                    |
| 65%          | 0.5        | 20231                                                | 3 %               | 5048 (4493; 5643)       | 701 (489; 971)              | 175 (120; 246)         | 141 (74; 210)     | 1875806 (0.2)  |                                                    |
|              | 1          | 8773                                                 | 1 %               | 2189 (1948; 2447)       | 304 (212; 421)              | 76 (52; 106)           | 61 (32; 91)       | 1421501 (0.24) |                                                    |
|              | 1.5        | 4406                                                 | 1 %               | 1099 (979; 1229)        | 153 (107; 212)              | 38 (26; 53)            | 31 (16; 46)       | 1663376 (0.23) |                                                    |
|              | 2          | 1353                                                 | 0 %               | 338 (300; 377)          | 47 (33; 65)                 | 12 (8; 16)             | 9 (5; 14)         | 1292265 (0.27) |                                                    |
| 80%          | 0.5        | 32770                                                | 4 %               | 8176 (7278; 9140)       | 1136 (792; 1573)            | 283 (195; 398)         | 228 (120; 340)    | 1904152 (0.19) |                                                    |
|              | 1          | 18536                                                | 2 %               | 4625 (4117; 5170)       | 643 (448; 890)              | 160 (110; 225)         | 129 (68; 192)     | 1535186 (0.22) |                                                    |
|              | 1.5        | 13145                                                | 2 %               | 3280 (2919; 3666)       | 456 (318; 631)              | 114 (78; 160)          | 92 (48; 136)      | 1604228 (0.22) |                                                    |
|              | 2          | 9360                                                 | 1 %               | 2335 (2079; 2611)       | 325 (226; 449)              | 81 (56; 114)           | 65 (34; 97)       | 1329497 (0.25) |                                                    |
|              | 4          | 7686                                                 | 1 %               | 1918 (1707; 2144)       | 266 (186; 369)              | 66 (46; 93)            | 54 (28; 80)       | 1700235 (0.22) |                                                    |
| 90%          | 0.5        | 41299                                                | 5 %               | 10304 (9172; 11519)     | 1432 (999; 1983)            | 357 (245; 501)         | 288 (151; 429)    | 2214411 (0.16) |                                                    |
|              | 1          | 25159                                                | 3 %               | 6277 (5587; 7017)       | 872 (608; 1208)             | 217 (149; 305)         | 175 (92; 261)     | 1747122 (0.19) |                                                    |
|              | 1.5        | 19046                                                | 2 %               | 4752 (4230; 5312)       | 660 (461; 914)              | 165 (113; 231)         | 133 (70; 198)     | 1802536 (0.19) |                                                    |
|              | 2          | 14779                                                | 2 %               | 3687 (3282; 4122)       | 512 (357; 710)              | 128 (88; 179)          | 103 (54; 153)     | 1482630 (0.22) |                                                    |
|              | 4          | 12882                                                | 2 %               | 3214 (2861; 3593)       | 447 (312; 618)              | 111 (76; 156)          | 90 (47; 134)      | 1887411 (0.2)  |                                                    |
| *65%         | 4          | 788750                                               |                   | 196797 (175169; 219993) | 27345 (19073; 37868)        | 6817 (4683; 9572)      | 5499 (2880; 8185) | 1543938 (0.25) |                                                    |

\* This is the baseline intervention; values are reported in absolute terms, and not in terms of avoided cases.



ii. Costs and effects (R\_0 = 1.4, 1.6, 1.8)

Table S70: Very severe pandemic influenza with R\_0=1.4: costs and benefits associated with each sick leave intervention relative to the baseline, assuming 35% of children and 25% of adults are symptomatic, and no extra mixing.

| Intervention |           | Mean costs (1000 USD) |                  |                   |                          |                          | Mean benefits |             |            | Output measures  |                                    |      |
|--------------|-----------|-----------------------|------------------|-------------------|--------------------------|--------------------------|---------------|-------------|------------|------------------|------------------------------------|------|
| % on leave   | Max. days | Productivity losses   | Cost of campaign | GP-visits avoided | Hospitalisations avoided | Medication costs avoided | Total costs   | QALYs saved | YPLL saved | Mean NHB (QALYs) | Median NHB (0.25; 0.75 percentile) | Rank |
| 65 %         | 0.5       | 39716                 | 3226             | 480               | 12087                    | 329                      | 30045         | 797         | 533        | 490              | 390 (239; 606)                     | 3    |
|              | 1         | 41061                 | 2409             | 209               | 5270                     | 144                      | 37847         | 347         | 232        | -39              | -81 (-148; 12)                     | 12   |
|              | 1.5       | 29351                 | 1756             | 105               | 2653                     | 72                       | 28276         | 175         | 117        | -114             | -135 (-169; -88)                   | 13   |
|              | 2         | 20312                 | 1234             | 32                | 809                      | 22                       | 20682         | 53          | 36         | -158             | -164 (-175; -149)                  | 14   |
| 80 %         | 0.5       | 51913                 | 5277             | 760               | 19137                    | 521                      | 36772         | 1273        | 842        | 898              | 729 (497; 1075)                    | 2    |
|              | 1         | 58525                 | 4456             | 431               | 10846                    | 295                      | 51409         | 720         | 476        | 196              | 101 (-32; 298)                     | 7    |
|              | 1.5       | 47568                 | 3799             | 305               | 7666                     | 209                      | 43187         | 509         | 336        | 68               | 1 (-94; 141)                       | 10   |
|              | 2         | 38887                 | 3274             | 216               | 5429                     | 148                      | 36368         | 360         | 237        | -11              | -58 (-127; 42)                     | 11   |
|              | 4         | 17137                 | 2033             | 176               | 4441                     | 121                      | 14432         | 291         | 194        | 144              | 109 (49; 192)                      | 8    |
| 90 %         | **0.5     | 58087                 | 6722             | 948               | 23861                    | 650                      | 39349         | 1586        | 1049       | 1185             | 976 (683; 1409)                    | 1    |
|              | 1         | 68713                 | 5901             | 579               | 14581                    | 397                      | 59057         | 968         | 640        | 366              | 238 (56; 504)                      | 4    |
|              | 1.5       | 58482                 | 5244             | 438               | 11026                    | 300                      | 51962         | 731         | 483        | 201              | 106 (-33; 307)                     | 6    |
|              | 2         | 50201                 | 4718             | 338               | 8517                     | 232                      | 45832         | 564         | 372        | 97               | 24 (-86; 180)                      | 9    |
|              | 4         | 27614                 | 3477             | 294               | 7412                     | 202                      | 23183         | 486         | 324        | 249              | 192 (91; 329)                      | 5    |
| *65 %        | 4         | 353397                | 0                | 8067              | 201918                   | 5534                     | 568916        | 13624       | 9257       | 22024            | 20394 (17899; 24010)               |      |

\*Baseline intervention; values reported as absolute gains and losses.

\*\*optimal intervention.

**Table S71: Very severe pandemic influenza with R<sub>0</sub>=1.6: costs and benefits associated with each sick leave intervention relative to the baseline, assuming 35% of children and 25% of adults are symptomatic, and no extra mixing.**

| Intervention |           | Mean costs (1000 USD) |                  |                   |                          |                          | Mean benefits |             |            | Output measures  |                                    |      |
|--------------|-----------|-----------------------|------------------|-------------------|--------------------------|--------------------------|---------------|-------------|------------|------------------|------------------------------------|------|
| % on leave   | Max. days | Productivity losses   | Cost of campaign | GP-visits avoided | Hospitalisations avoided | Medication costs avoided | Total costs   | QALYs saved | YPLL saved | Mean NHB (QALYs) | Median NHB (0.25; 0.75 percentile) | Rank |
| 65 %         | 0.5       | 79503                 | 3226             | 408               | 10273                    | 280                      | 71767         | 668         | 443        | -64              | -148 (-277; 34)                    | 4    |
|              | 1         | 67830                 | 2409             | 177               | 4467                     | 122                      | 65473         | 290         | 192        | -377             | -413 (-470; -333)                  | 11   |
|              | 1.5       | 46227                 | 1756             | 89                | 2247                     | 61                       | 45586         | 146         | 97         | -319             | -336 (-366; -296)                  | 7    |
|              | 2         | 30063                 | 1234             | 27                | 689                      | 19                       | 30562         | 45          | 30         | -267             | -272 (-282; -258)                  | 6    |
| 80 %         | 0.5       | 112030                | 5277             | 655               | 16492                    | 450                      | 99710         | 1082        | 709        | 65               | -81 (-281; 217)                    | 2    |
|              | 1         | 103851                | 4456             | 371               | 9339                     | 255                      | 98342         | 612         | 400        | -391             | -472 (-589; -304)                  | 14   |
|              | 1.5       | 81629                 | 3799             | 263               | 6617                     | 181                      | 78368         | 433         | 283        | -366             | -423 (-508; -303)                  | 9    |
|              | 2         | 64856                 | 3274             | 187               | 4700                     | 128                      | 63115         | 307         | 201        | -336             | -375 (-439; -288)                  | 8    |
| 90 %         | 4         | 32035                 | 2033             | 153               | 3857                     | 105                      | 29953         | 249         | 164        | -56              | -84 (-141; -11)                    | 3    |
|              | **0.5     | 131716                | 6722             | 822               | 20692                    | 565                      | 116359        | 1357        | 888        | 170              | -11 (-268; 363)                    | 1    |
|              | 1         | 126396                | 5901             | 502               | 12629                    | 345                      | 118822        | 827         | 541        | -385             | -494 (-655; -263)                  | 13   |
|              | 1.5       | 104024                | 5244             | 380               | 9559                     | 261                      | 99069         | 625         | 409        | -385             | -465 (-593; -289)                  | 12   |
| *65 %        | 2         | 86983                 | 4718             | 294               | 7403                     | 202                      | 83803         | 484         | 316        | -371             | -429 (-534; -291)                  | 10   |
|              | 4         | 52470                 | 3477             | 256               | 6449                     | 176                      | 49067         | 417         | 275        | -84              | -130 (-225; -8)                    | 5    |
| *65 %        | 4         | 490533                | 0                | 11182             | 279903                   | 7684                     | 789302        | 18781       | 12710      | 30493            | 28221 (24779; 33235)               |      |

\*Baseline intervention; values reported as absolute gains and losses.

\*\*optimal intervention.

**Table S72: Very severe pandemic influenza with R\_0=1.8: costs and benefits associated with each sick leave intervention relative to the baseline, assuming 35% of children and 25% of adults are symptomatic, and no extra mixing.**

| Intervention |           | Mean costs (1000 USD) |                  |                   |                          |                          | Mean benefits |             |            | Output measures  |                                    |      |
|--------------|-----------|-----------------------|------------------|-------------------|--------------------------|--------------------------|---------------|-------------|------------|------------------|------------------------------------|------|
| % on leave   | Max. days | Productivity losses   | Cost of campaign | GP-visits avoided | Hospitalisations avoided | Medication costs avoided | Total costs   | QALYs saved | YPLL saved | Mean NHB (QALYs) | Median NHB (0.25; 0.75 percentile) | Rank |
| 65 %         | 0.5       | 110434                | 3226             | 345               | 8692                     | 238                      | 104384        | 559         | 368        | -505             | -577 (-686; -421)                  | 13   |
|              | 1         | 64390                 | 2409             | 150               | 3769                     | 103                      | 62777         | 242         | 159        | -398             | -428 (-476; -361)                  | 8    |
|              | 1.5       | 57059                 | 1756             | 75                | 1893                     | 52                       | 56796         | 122         | 80         | -457             | -472 (-498; -437)                  | 11   |
|              | 2         | 27673                 | 1234             | 23                | 581                      | 16                       | 28287         | 37          | 24         | -251             | -255 (-264; -243)                  | 3    |
| 80 %         | 0.5       | 130313                | 5277             | 559               | 14081                    | 385                      | 120566        | 914         | 593        | -316             | -440 (-611; -186)                  | 5    |
|              | 1         | 89771                 | 4456             | 316               | 7965                     | 218                      | 85729         | 516         | 335        | -358             | -428 (-526; -284)                  | 7    |
|              | 1.5       | 80296                 | 3799             | 224               | 5648                     | 154                      | 78069         | 366         | 237        | -431             | -479 (-552; -376)                  | 9    |
|              | 2         | 50864                 | 3274             | 160               | 4022                     | 110                      | 49846         | 260         | 168        | -248             | -282 (-336; -207)                  | 2    |
|              | **4       | 40494                 | 2033             | 131               | 3302                     | 90                       | 39004         | 211         | 138        | -187             | -209 (-262; -143)                  | 1    |
| 90 %         | 0.5       | 171441                | 6722             | 705               | 17745                    | 485                      | 159227        | 1151        | 747        | -473             | -628 (-849; -306)                  | 12   |
|              | 1         | 117490                | 5901             | 429               | 10810                    | 296                      | 111856        | 700         | 454        | -441             | -533 (-672; -336)                  | 10   |
|              | 1.5       | 107823                | 5244             | 325               | 8184                     | 224                      | 104334        | 530         | 343        | -534             | -602 (-712; -450)                  | 14   |
|              | 2         | 71045                 | 4718             | 252               | 6350                     | 174                      | 68987         | 410         | 266        | -293             | -344 (-432; -226)                  | 4    |
|              | 4         | 68514                 | 3477             | 220               | 5535                     | 151                      | 66085         | 354         | 231        | -320             | -357 (-446; -246)                  | 6    |
| *65 %        | 4         | 590573                | 0                | 13464             | 337014                   | 9266                     | 950317        | 22511       | 15182      | 36659            | 33907 (29785; 39945)               |      |

\*Baseline intervention; values reported as absolute gains and losses.  
 \*\*optimal intervention.

Section IV: Scenarios with low symptomatic proportion (35% children, and 25% adults assumed to be symptomatic), with extra mixing

## A. Seasonal influenza

### i. Epidemiology ( $R_{eff} = 1.2, 1.3, 1.4$ )

**Table S73: Seasonal influenza with  $R_{eff}=1.2$ : number of avoided cases, GP-visits, hospitalizations, and deaths associated with each sick leave intervention, assuming 35% of children and 25% adults are symptomatic, and with extra mixing.**

| Intervention |            | Median (0.25; 0.75 percentiles) relative to baseline |                   |                      |                             |                        |                | Mean                                          |
|--------------|------------|------------------------------------------------------|-------------------|----------------------|-----------------------------|------------------------|----------------|-----------------------------------------------|
| % on leave   | Delay time | Symptomatic cases avoided                            | % Reduction in AR | GP-visits avoided    | Hospital admissions avoided | ICU admissions avoided | Avoided Deaths | workdays lost (proportion lost to caregiving) |
| 65%          | 0.5        | 17945                                                | 11 %              | 2682 (2282; 3125)    | 129 (54; 255)               | 13 (5; 26)             | 27 (14; 41)    | 238836 (0.4)                                  |
|              | 1          | 7892                                                 | 5 %               | 1180 (1004; 1374)    | 57 (24; 112)                | 6 (2; 11)              | 12 (6; 18)     | 236903 (0.43)                                 |
|              | 1.5        | 3986                                                 | 2 %               | 596 (507; 694)       | 29 (12; 57)                 | 3 (1; 6)               | 6 (3; 9)       | 226116 (0.46)                                 |
|              | 2          | 1232                                                 | 1 %               | 184 (157; 215)       | 9 (4; 17)                   | 1 (0; 2)               | 2 (1; 3)       | 217639 (0.48)                                 |
| 80%          | 0.5        | 25877                                                | 16 %              | 3868 (3291; 4506)    | 186 (78; 367)               | 18 (8; 37)             | 39 (21; 58)    | 256515 (0.36)                                 |
|              | 1          | 14189                                                | 9 %               | 2121 (1805; 2471)    | 102 (43; 201)               | 10 (4; 20)             | 22 (11; 32)    | 256992 (0.38)                                 |
|              | 1.5        | 9645                                                 | 6 %               | 1442 (1227; 1680)    | 69 (29; 137)                | 7 (3; 14)              | 15 (8; 22)     | 245180 (0.41)                                 |
|              | 2          | 6433                                                 | 4 %               | 962 (818; 1120)      | 46 (20; 91)                 | 5 (2; 9)               | 10 (5; 15)     | 235675 (0.44)                                 |
| 90%          | 4          | 5001                                                 | 3 %               | 748 (636; 871)       | 36 (15; 71)                 | 4 (1; 7)               | 8 (4; 11)      | 215703 (0.48)                                 |
|              | 0.5        | 31068                                                | 19 %              | 4644 (3952; 5410)    | 224 (94; 441)               | 22 (9; 45)             | 47 (25; 70)    | 266234 (0.33)                                 |
|              | 1          | 18343                                                | 11 %              | 2742 (2333; 3194)    | 132 (56; 260)               | 13 (5; 26)             | 28 (15; 41)    | 268862 (0.36)                                 |
|              | 1.5        | 13389                                                | 8 %               | 2001 (1703; 2332)    | 96 (41; 190)                | 10 (4; 19)             | 20 (11; 30)    | 256646 (0.39)                                 |
| *65 %        | 2          | 9872                                                 | 6 %               | 1476 (1256; 1719)    | 71 (30; 140)                | 7 (3; 14)              | 15 (8; 22)     | 246685 (0.41)                                 |
|              | 4          | 8304                                                 | 5 %               | 1241 (1056; 1446)    | 60 (25; 118)                | 6 (2; 12)              | 13 (7; 19)     | 224932 (0.45)                                 |
| *65 %        | 4          | 162646                                               |                   | 24312 (20687; 28323) | 1171 (493; 2307)            | 116 (48; 233)          | 247 (129; 368) | 200628 (0.53)                                 |

\* This is the baseline intervention; values are reported in absolute terms, and not in terms of avoided cases.

**Table S74: Seasonal influenza with  $R_{eff}=1.3$ : number of avoided cases, GP-visits, hospitalizations, and deaths associated with each sick leave intervention, assuming 35% of children and 25% adults are symptomatic, and with extra mixing.**

| Intervention |            | Median (0.25; 0.75 percentiles) relative to baseline |                   |                      |                             |                        |                | Mean                                          |
|--------------|------------|------------------------------------------------------|-------------------|----------------------|-----------------------------|------------------------|----------------|-----------------------------------------------|
| % on leave   | Delay time | Symptomatic cases avoided                            | % Reduction in AR | GP-visits avoided    | Hospital admissions avoided | ICU admissions avoided | Avoided Deaths | workdays lost (proportion lost to caregiving) |
| 65%          | 0.5        | 17154                                                | 6 %               | 2564 (2182; 2987)    | 124 (52; 243)               | 12 (5; 25)             | 26 (14; 39)    | 414674 (0.39)                                 |
|              | 1          | 7519                                                 | 3 %               | 1124 (956; 1309)     | 54 (23; 107)                | 5 (2; 11)              | 11 (6; 17)     | 398675 (0.42)                                 |
|              | 1.5        | 3803                                                 | 1 %               | 568 (484; 662)       | 27 (12; 54)                 | 3 (1; 5)               | 6 (3; 9)       | 375805 (0.45)                                 |
|              | 2          | 1175                                                 | 0 %               | 176 (149; 205)       | 8 (4; 17)                   | 1 (0; 2)               | 2 (1; 3)       | 358581 (0.47)                                 |
| 80%          | 0.5        | 25288                                                | 9 %               | 3780 (3216; 4404)    | 182 (77; 359)               | 18 (7; 36)             | 38 (20; 57)    | 457241 (0.34)                                 |
|              | 1          | 13941                                                | 5 %               | 2084 (1773; 2428)    | 100 (42; 198)               | 10 (4; 20)             | 21 (11; 32)    | 440965 (0.37)                                 |
|              | 1.5        | 9542                                                 | 4 %               | 1426 (1214; 1662)    | 69 (29; 135)                | 7 (3; 14)              | 14 (8; 22)     | 414533 (0.4)                                  |
|              | 2          | 6434                                                 | 2 %               | 962 (818; 1120)      | 46 (20; 91)                 | 5 (2; 9)               | 10 (5; 15)     | 394429 (0.42)                                 |
| 90%          | 4          | 5057                                                 | 2 %               | 756 (643; 881)       | 36 (15; 72)                 | 4 (1; 7)               | 8 (4; 11)      | 358719 (0.47)                                 |
|              | 0.5        | 30656                                                | 11 %              | 4582 (3899; 5338)    | 221 (93; 435)               | 22 (9; 44)             | 46 (24; 69)    | 483185 (0.32)                                 |
|              | 1          | 18183                                                | 7 %               | 2718 (2313; 3166)    | 131 (55; 258)               | 13 (5; 26)             | 28 (14; 41)    | 467434 (0.34)                                 |
|              | 1.5        | 13344                                                | 5 %               | 1995 (1697; 2324)    | 96 (40; 189)                | 10 (4; 19)             | 20 (11; 30)    | 438982 (0.37)                                 |
| *65%         | 2          | 9934                                                 | 4 %               | 1485 (1264; 1730)    | 72 (30; 141)                | 7 (3; 14)              | 15 (8; 22)     | 417174 (0.4)                                  |
|              | 4          | 8401                                                 | 3 %               | 1256 (1069; 1463)    | 61 (25; 119)                | 6 (2; 12)              | 13 (7; 19)     | 377827 (0.44)                                 |
|              | 4          | 267991                                               |                   | 40058 (34087; 46668) | 1930 (813; 3801)            | 191 (79; 384)          | 406 (213; 606) | 328700 (0.52)                                 |

\* This is the baseline intervention; values are reported in absolute terms, and not in terms of avoided cases.

**Table S75: Seasonal influenza with R\_eff=1.4: number of avoided cases, GP-visits, hospitalizations, and deaths associated with each sick leave intervention, assuming 35% of children and 25% adults are symptomatic, and with extra mixing.**

| Intervention |            | Median (0.25; 0.75 percentiles) relative to baseline |                 |                      |                             |                        |                | Mean                            |
|--------------|------------|------------------------------------------------------|-----------------|----------------------|-----------------------------|------------------------|----------------|---------------------------------|
|              |            | %                                                    |                 |                      |                             |                        |                | workdays lost                   |
| % on leave   | Delay time | Symptomatic cases avoided                            | Reduction in AR | GP-visits avoided    | Hospital admissions avoided | ICU admissions avoided | Avoided Deaths | (proportion lost to caregiving) |
| 65%          | 0.5        | 16209                                                | 5 %             | 2423 (2062; 2823)    | 117 (49; 230)               | 12 (5; 23)             | 25 (13; 37)    | 564444 (0.38)                   |
|              | 1          | 7094                                                 | 2 %             | 1060 (902; 1235)     | 51 (22; 101)                | 5 (2; 10)              | 11 (6; 16)     | 535802 (0.4)                    |
|              | 1.5        | 3585                                                 | 1 %             | 536 (456; 624)       | 26 (11; 51)                 | 3 (1; 5)               | 5 (3; 8)       | 502240 (0.44)                   |
|              | 2          | 1102                                                 | 0 %             | 165 (140; 192)       | 8 (3; 16)                   | 1 (0; 2)               | 2 (1; 2)       | 477284 (0.46)                   |
| 80%          | 0.5        | 24283                                                | 7 %             | 3630 (3089; 4229)    | 175 (74; 344)               | 17 (7; 35)             | 37 (19; 55)    | 629516 (0.33)                   |
|              | 1          | 13422                                                | 4 %             | 2006 (1707; 2337)    | 97 (41; 190)                | 10 (4; 19)             | 20 (11; 30)    | 598014 (0.36)                   |
|              | 1.5        | 9226                                                 | 3 %             | 1379 (1173; 1607)    | 66 (28; 131)                | 7 (3; 13)              | 14 (7; 21)     | 558548 (0.39)                   |
|              | 2          | 6274                                                 | 2 %             | 938 (798; 1093)      | 45 (19; 89)                 | 4 (2; 9)               | 10 (5; 14)     | 528991 (0.41)                   |
| 90%          | 4          | 4968                                                 | 1 %             | 743 (632; 865)       | 36 (15; 70)                 | 4 (1; 7)               | 8 (4; 11)      | 479390 (0.46)                   |
|              | 0.5        | 29644                                                | 8 %             | 4431 (3771; 5162)    | 214 (90; 420)               | 21 (9; 43)             | 45 (24; 67)    | 670253 (0.31)                   |
|              | 1          | 17631                                                | 5 %             | 2635 (2243; 3070)    | 127 (53; 250)               | 13 (5; 25)             | 27 (14; 40)    | 637645 (0.33)                   |
|              | 1.5        | 12991                                                | 4 %             | 1942 (1652; 2262)    | 94 (39; 184)                | 9 (4; 19)              | 20 (10; 29)    | 594621 (0.36)                   |
| *65%         | 2          | 9710                                                 | 3 %             | 1451 (1235; 1691)    | 70 (29; 138)                | 7 (3; 14)              | 15 (8; 22)     | 562274 (0.38)                   |
|              | 4          | 8263                                                 | 2 %             | 1235 (1051; 1439)    | 60 (25; 117)                | 6 (2; 12)              | 13 (7; 19)     | 507324 (0.43)                   |
|              |            | 357358                                               |                 | 53417 (45453; 62230) | 2574 (1084; 5069)           | 255 (105; 512)         | 542 (284; 808) | 436069 (0.5)                    |

\* This is the baseline intervention; values are reported in absolute terms, and not in terms of avoided cases.

ii. Costs and effects (R\_eff = 1.2, 1.3, 1.4)

Table S76: Seasonal influenza with R\_eff=1.2: costs and benefits associated with each sick leave intervention relative to the baseline, assuming 35% of children and 25% of adults are symptomatic, and with extra mixing.

| Intervention |           | Mean costs (1000 USD) |                  |                   |                          |                          | Mean benefits |             |            | Output measures  |                                    |      |
|--------------|-----------|-----------------------|------------------|-------------------|--------------------------|--------------------------|---------------|-------------|------------|------------------|------------------------------------|------|
| % on leave   | Max. days | Productivity losses   | Cost of campaign | GP-visits avoided | Hospitalisations avoided | Medication costs avoided | Total costs   | QALYs saved | YPLL saved | Mean NHB (QALYs) | Median NHB (0.25; 0.75 percentile) | Rank |
| 65 %         | 0.5       | 9650                  | 3227             | 184               | 1434                     | 190                      | 11069         | 280         | 70         | 167              | 88 (17; 214)                       | 3    |
|              | 1         | 11509                 | 2411             | 81                | 631                      | 84                       | 13124         | 123         | 31         | -11              | -46 (-76; 11)                      | 12   |
|              | 1.5       | 8488                  | 1757             | 41                | 319                      | 42                       | 9844          | 62          | 16         | -38              | -56 (-71; -27)                     | 13   |
|              | 2         | 6035                  | 1234             | 13                | 98                       | 13                       | 7145          | 19          | 5          | -54              | -59 (-64; -50)                     | 14   |
| 80 %         | 0.5       | 9057                  | 5276             | 265               | 2083                     | 275                      | 11711         | 411         | 101        | 291              | 170 (72; 358)                      | 2    |
|              | 1         | 12441                 | 4456             | 145               | 1142                     | 151                      | 15459         | 225         | 55         | 68               | 1 (-53; 104)                       | 7    |
|              | 1.5       | 9663                  | 3799             | 99                | 776                      | 102                      | 12485         | 153         | 38         | 26               | -19 (-56; 51)                      | 10   |
|              | 2         | 7303                  | 3274             | 66                | 518                      | 68                       | 9926          | 102         | 25         | 1                | -29 (-54; 18)                      | 11   |
|              | 4         | 878                   | 2034             | 51                | 400                      | 53                       | 2408          | 78          | 19         | 53               | 32 (12; 67)                        | 8    |
| 90 %         | **0.5     | 8293                  | 6721             | 318               | 2501                     | 330                      | 11865         | 493         | 121        | 372              | 226 (109; 452)                     | 1    |
|              | 1         | 12772                 | 5901             | 188               | 1476                     | 195                      | 16814         | 291         | 72         | 120              | 34 (-36; 167)                      | 4    |
|              | 1.5       | 10199                 | 5244             | 137               | 1078                     | 142                      | 14087         | 212         | 52         | 69               | 6 (-45; 103)                       | 6    |
|              | 2         | 7955                  | 4719             | 101               | 795                      | 105                      | 11674         | 157         | 38         | 38               | -8 (-46; 63)                       | 9    |
|              | 4         | 1305                  | 3479             | 85                | 664                      | 88                       | 3948          | 129         | 32         | 89               | 53 (20; 112)                       | 5    |
| *65 %        | 4         | 78363                 | 0                | 1665              | 12937                    | 1728                     | 94693         | 2541        | 636        | 3873             | 3151 (2526; 4317)                  |      |

\*Baseline intervention; values reported as absolute gains and losses.  
\*\*optimal intervention.

**Table S77: Seasonal influenza with R<sub>eff</sub>=1.3: costs and benefits associated with each sick leave intervention relative to the baseline, assuming 35% of children and 25% of adults are symptomatic, and with extra mixing.**

| Intervention |           | Mean costs (1000 USD) |                  |                   |                          |                          | Mean benefits |             |            | Output measures  |                                    |      |
|--------------|-----------|-----------------------|------------------|-------------------|--------------------------|--------------------------|---------------|-------------|------------|------------------|------------------------------------|------|
| % on leave   | Max. days | Productivity losses   | Cost of campaign | GP-visits avoided | Hospitalisations avoided | Medication costs avoided | Total costs   | QALYs saved | YPLL saved | Mean NHB (QALYs) | Median NHB (0.25; 0.75 percentile) | Rank |
| 65 %         | 0.5       | 27437                 | 3227             | 176               | 1371                     | 182                      | 28936         | 267         | 67         | -28              | -104 (-170; 18)                    | 5    |
|              | 1         | 24078                 | 2411             | 77                | 601                      | 80                       | 25731         | 117         | 29         | -145             | -178 (-208; -125)                  | 14   |
|              | 1.5       | 16549                 | 1757             | 39                | 304                      | 40                       | 17923         | 59          | 15         | -124             | -140 (-155; -113)                  | 13   |
|              | 2         | 10839                 | 1234             | 12                | 94                       | 12                       | 11955         | 18          | 5          | -104             | -108 (-114; -100)                  | 11   |
| 80 %         | 0.5       | 31765                 | 5276             | 259               | 2036                     | 268                      | 34478         | 401         | 98         | 49               | -70 (-165; 115)                    | 2    |
|              | 1         | 29477                 | 4456             | 143               | 1122                     | 148                      | 32520         | 221         | 54         | -111             | -176 (-229; -74)                   | 12   |
|              | 1.5       | 21715                 | 3799             | 98                | 768                      | 101                      | 24548         | 151         | 37         | -99              | -144 (-180; -74)                   | 10   |
|              | 2         | 15748                 | 3274             | 66                | 518                      | 68                       | 18370         | 102         | 25         | -85              | -115 (-140; -68)                   | 8    |
|              | 4         | 3948                  | 2034             | 52                | 404                      | 54                       | 5473          | 79          | 20         | 23               | 1 (-19; 37)                        | 4    |
| 90 %         | 0.5       | 34177                 | 6721             | 314               | 2468                     | 325                      | 37792         | 486         | 119        | 101              | -43 (-159; 179)                    | 1    |
|              | 1         | 32738                 | 5901             | 186               | 1464                     | 193                      | 36796         | 288         | 71         | -87              | -172 (-241; -40)                   | 9    |
|              | 1.5       | 24889                 | 5244             | 137               | 1074                     | 142                      | 28781         | 212         | 52         | -82              | -144 (-196; -47)                   | 7    |
|              | 2         | 18788                 | 4719             | 102               | 800                      | 105                      | 22500         | 158         | 39         | -72              | -117 (-156; -45)                   | 6    |
|              | **4       | 6405                  | 3479             | 86                | 671                      | 89                       | 9037          | 131         | 33         | 39               | 3 (-32; 63)                        | 3    |
| *65 %        | 4         | 128298                | 0                | 2743              | 21316                    | 2849                     | 155206        | 4185        | 1046       | 6385             | 5196 (4165; 7117)                  |      |

\*Baseline intervention; values reported as absolute gains and losses.

\*\*optimal intervention.



**Table S78: Seasonal influenza with R\_eff=1.4: costs and benefits associated with each sick leave intervention relative to the baseline, assuming 35% of children and 25% of adults are symptomatic, and with extra mixing.**

| Intervention |           | Mean costs (1000 USD) |                  |                   |                          |                          | Mean benefits |             |            | Output measures  |                                    |      |
|--------------|-----------|-----------------------|------------------|-------------------|--------------------------|--------------------------|---------------|-------------|------------|------------------|------------------------------------|------|
| % on leave   | Max. days | Productivity losses   | Cost of campaign | GP-visits avoided | Hospitalisations avoided | Medication costs avoided | Total costs   | QALYs saved | YPLL saved | Mean NHB (QALYs) | Median NHB (0.25; 0.75 percentile) | Rank |
| 65 %         | 0.5       | 43340                 | 3227             | 166               | 1295                     | 172                      | 44934         | 252         | 63         | -206             | -277 (-340; -162)                  | 9    |
|              | 1         | 35227                 | 2411             | 73                | 567                      | 75                       | 36923         | 110         | 28         | -266             | -297 (-325; -246)                  | 12   |
|              | 1.5       | 23688                 | 1757             | 37                | 286                      | 38                       | 25084         | 56          | 14         | -200             | -215 (-230; -189)                  | 8    |
|              | 2         | 15078                 | 1234             | 11                | 88                       | 12                       | 16201         | 17          | 4          | -148             | -152 (-158; -144)                  | 3    |
| 80 %         | 0.5       | 52281                 | 5276             | 249               | 1955                     | 258                      | 55096         | 385         | 94         | -177             | -291 (-383; -114)                  | 7    |
|              | 1         | 44760                 | 4456             | 137               | 1080                     | 143                      | 47855         | 213         | 52         | -275             | -338 (-389; -240)                  | 13   |
|              | 1.5       | 32527                 | 3799             | 94                | 743                      | 98                       | 35391         | 146         | 36         | -215             | -257 (-293; -191)                  | 10   |
|              | 2         | 23314                 | 3274             | 64                | 505                      | 67                       | 25952         | 99          | 24         | -165             | -194 (-219; -148)                  | 5    |
|              | **4       | 6760                  | 2034             | 51                | 397                      | 53                       | 8293          | 77          | 19         | -7               | -28 (-49; 7)                       | 1    |
| 90 %         | 0.5       | 57704                 | 6721             | 303               | 2386                     | 315                      | 61421         | 470         | 115        | -157             | -296 (-408; -81)                   | 4    |
|              | 1         | 50737                 | 5901             | 180               | 1419                     | 187                      | 54851         | 279         | 68         | -280             | -362 (-430; -234)                  | 14   |
|              | 1.5       | 38116                 | 5244             | 133               | 1046                     | 138                      | 42044         | 206         | 50         | -223             | -283 (-333; -188)                  | 11   |
|              | 2         | 28565                 | 4719             | 99                | 782                      | 103                      | 32301         | 154         | 38         | -176             | -219 (-258; -149)                  | 6    |
|              | 4         | 11081                 | 3479             | 85                | 660                      | 88                       | 13727         | 129         | 32         | -11              | -47 (-81; 13)                      | 2    |
| *65 %        | 4         | 170114                | 0                | 3658              | 28425                    | 3801                     | 205998        | 5578        | 1392       | 8517             | 6933 (5559; 9487)                  |      |

\*Baseline intervention; values reported as absolute gains and losses.  
 \*\*optimal intervention.

## B. Moderate pandemic

### i. Epidemiology ( $R_0 = 1.4, 1.6, 1.8$ )

**Table S79: Moderate pandemic influenza with  $R_0=1.4$ : number of avoided cases, GP-visits, hospitalizations, and deaths associated with each sick leave intervention, assuming 35% of children and 25% adults are symptomatic, and with extra mixing.**

| Intervention |            | Median (0.25; 0.75 percentiles) relative to baseline |                   |                      |                             |                        |                 |                | Mean workdays lost (proportion lost to caregiving) |
|--------------|------------|------------------------------------------------------|-------------------|----------------------|-----------------------------|------------------------|-----------------|----------------|----------------------------------------------------|
| % on leave   | Delay time | Symptomatic cases avoided                            | % Reduction in AR | GP-visits avoided    | Hospital admissions avoided | ICU admissions avoided | Avoided Deaths  |                |                                                    |
| 65%          | 0.5        | 23680                                                | 5 %               | 3540 (3012; 4124)    | 171 (72; 336)               | 17 (7; 34)             | 36 (19; 54)     | 1091116 (0.22) |                                                    |
|              | 1          | 10333                                                | 2 %               | 1545 (1314; 1799)    | 74 (31; 147)                | 7 (3; 15)              | 16 (8; 23)      | 1061697 (0.23) |                                                    |
|              | 1.5        | 5204                                                 | 1 %               | 778 (662; 906)       | 37 (16; 74)                 | 4 (2; 7)               | 8 (4; 12)       | 1017659 (0.24) |                                                    |
|              | 2          | 1589                                                 | 0 %               | 238 (202; 277)       | 11 (5; 23)                  | 1 (0; 2)               | 2 (1; 4)        | 984651 (0.25)  |                                                    |
| 80%          | 0.5        | 37330                                                | 8 %               | 5580 (4748; 6501)    | 269 (113; 529)              | 27 (11; 54)            | 57 (30; 84)     | 1245270 (0.19) |                                                    |
|              | 1          | 21139                                                | 4 %               | 3160 (2689; 3681)    | 152 (64; 300)               | 15 (6; 30)             | 32 (17; 48)     | 1218871 (0.2)  |                                                    |
|              | 1.5        | 14921                                                | 3 %               | 2230 (1898; 2598)    | 107 (45; 212)               | 11 (4; 21)             | 23 (12; 34)     | 1169108 (0.21) |                                                    |
|              | 2          | 10551                                                | 2 %               | 1577 (1342; 1837)    | 76 (32; 150)                | 8 (3; 15)              | 16 (8; 24)      | 1131404 (0.22) |                                                    |
|              | 4          | 8612                                                 | 2 %               | 1287 (1095; 1500)    | 62 (26; 122)                | 6 (3; 12)              | 13 (7; 19)      | 1061981 (0.23) |                                                    |
| 90%          | 0.5        | 46457                                                | 10 %              | 6944 (5909; 8090)    | 335 (141; 659)              | 33 (14; 67)            | 70 (37; 105)    | 1340091 (0.17) |                                                    |
|              | 1          | 28380                                                | 6 %               | 4242 (3610; 4942)    | 204 (86; 403)               | 20 (8; 41)             | 43 (23; 64)     | 1317712 (0.18) |                                                    |
|              | 1.5        | 21436                                                | 5 %               | 3204 (2727; 3733)    | 154 (65; 304)               | 15 (6; 31)             | 33 (17; 48)     | 1265068 (0.19) |                                                    |
|              | 2          | 16549                                                | 3 %               | 2474 (2105; 2882)    | 119 (50; 235)               | 12 (5; 24)             | 25 (13; 37)     | 1224889 (0.2)  |                                                    |
|              | 4          | 14382                                                | 3 %               | 2150 (1829; 2504)    | 104 (44; 204)               | 10 (4; 21)             | 22 (11; 33)     | 1148600 (0.21) |                                                    |
| *65%         | 4          | 473995                                               |                   | 70851 (60289; 82542) | 3414 (1437; 6723)           | 338 (139; 680)         | 719 (377; 1072) | 926266 (0.27)  |                                                    |

\* This is the baseline intervention; values are reported in absolute terms, and not in terms of avoided cases.

**Table S80: Moderate pandemic influenza with R<sub>0</sub>=1.6: number of avoided cases, GP-visits, hospitalizations, and deaths associated with each sick leave intervention, assuming 35% of children and 25% adults are symptomatic, and with extra mixing.**

| Intervention |            | Median (0.25; 0.75 percentiles) relative to baseline |                   |                       |                             |                        |                 | Mean workdays lost (proportion lost to caregiving) |
|--------------|------------|------------------------------------------------------|-------------------|-----------------------|-----------------------------|------------------------|-----------------|----------------------------------------------------|
| % on leave   | Delay time | Symptomatic cases avoided                            | % Reduction in AR | GP-visits avoided     | Hospital admissions avoided | ICU admissions avoided | Avoided Deaths  |                                                    |
| 65%          | 0.5        | 20039                                                | 3 %               | 2995 (2549; 3490)     | 144 (61; 284)               | 14 (6; 29)             | 30 (16; 45)     | 1549468 (0.21)                                     |
|              | 1          | 8717                                                 | 1 %               | 1303 (1109; 1518)     | 63 (26; 124)                | 6 (3; 12)              | 13 (7; 20)      | 1488845 (0.22)                                     |
|              | 1.5        | 4384                                                 | 1 %               | 655 (558; 763)        | 32 (13; 62)                 | 3 (1; 6)               | 7 (3; 10)       | 1419784 (0.23)                                     |
|              | 2          | 1337                                                 | 0 %               | 200 (170; 233)        | 10 (4; 19)                  | 1 (0; 2)               | 2 (1; 3)        | 1368766 (0.24)                                     |
| 80%          | 0.5        | 32035                                                | 5 %               | 4788 (4075; 5579)     | 231 (97; 454)               | 23 (9; 46)             | 49 (25; 72)     | 1793787 (0.18)                                     |
|              | 1          | 18150                                                | 3 %               | 2713 (2309; 3161)     | 131 (55; 257)               | 13 (5; 26)             | 28 (14; 41)     | 1728624 (0.19)                                     |
|              | 1.5        | 12830                                                | 2 %               | 1918 (1632; 2234)     | 92 (39; 182)                | 9 (4; 18)              | 19 (10; 29)     | 1647863 (0.2)                                      |
|              | 2          | 9113                                                 | 1 %               | 1362 (1159; 1587)     | 66 (28; 129)                | 7 (3; 13)              | 14 (7; 21)      | 1587809 (0.21)                                     |
| 90%          | 4          | 7466                                                 | 1 %               | 1116 (950; 1300)      | 54 (23; 106)                | 5 (2; 11)              | 11 (6; 17)      | 1486605 (0.22)                                     |
|              | 0.5        | 40148                                                | 6 %               | 6001 (5107; 6991)     | 289 (122; 569)              | 29 (12; 58)            | 61 (32; 91)     | 1948913 (0.16)                                     |
|              | 1          | 24504                                                | 4 %               | 3663 (3117; 4267)     | 176 (74; 348)               | 17 (7; 35)             | 37 (19; 55)     | 1882840 (0.17)                                     |
|              | 1.5        | 18532                                                | 3 %               | 2770 (2357; 3227)     | 133 (56; 263)               | 13 (5; 27)             | 28 (15; 42)     | 1795168 (0.18)                                     |
| *65%         | 2          | 14344                                                | 2 %               | 2144 (1824; 2498)     | 103 (43; 203)               | 10 (4; 21)             | 22 (11; 32)     | 1729747 (0.19)                                     |
|              | 4          | 12494                                                | 2 %               | 1868 (1589; 2176)     | 90 (38; 177)                | 9 (4; 18)              | 19 (10; 28)     | 1617602 (0.2)                                      |
|              |            | 656378                                               |                   | 98113 (83487; 114302) | 4728 (1990; 9310)           | 469 (193; 941)         | 995 (522; 1484) | 1284702 (0.26)                                     |

\* This is the baseline intervention; values are reported in absolute terms, and not in terms of avoided cases.

**Table S81: Moderate pandemic influenza with R<sub>0</sub>=1.8: number of avoided cases, GP-visits, hospitalizations, and deaths associated with each sick leave intervention, assuming 35% of children and 25% adults are symptomatic, and with extra mixing.**

| Intervention |            | Median (0.25; 0.75 percentiles) relative to baseline |                   |                         |                             |                        |                  |                | Mean workdays lost (proportion lost to caregiving) |
|--------------|------------|------------------------------------------------------|-------------------|-------------------------|-----------------------------|------------------------|------------------|----------------|----------------------------------------------------|
| % on leave   | Delay time | Symptomatic cases avoided                            | % Reduction in AR | GP-visits avoided       | Hospital admissions avoided | ICU admissions avoided | Avoided Deaths   |                |                                                    |
| 65%          | 0.5        | 16883                                                | 2 %               | 2524 (2147; 2940)       | 122 (51; 239)               | 12 (5; 24)             | 26 (13; 38)      | 1886851 (0.2)  |                                                    |
|              | 1          | 7331                                                 | 1 %               | 1096 (932; 1277)        | 53 (22; 104)                | 5 (2; 11)              | 11 (6; 17)       | 1802061 (0.21) |                                                    |
|              | 1.5        | 3683                                                 | 0 %               | 551 (468; 641)          | 27 (11; 52)                 | 3 (1; 5)               | 6 (3; 8)         | 1714030 (0.22) |                                                    |
|              | 2          | 1131                                                 | 0 %               | 169 (144; 197)          | 8 (3; 16)                   | 1 (0; 2)               | 2 (1; 3)         | 1649393 (0.23) |                                                    |
| 80%          | 0.5        | 27246                                                | 3 %               | 4073 (3466; 4745)       | 196 (83; 386)               | 19 (8; 39)             | 41 (22; 62)      | 2200452 (0.17) |                                                    |
|              | 1          | 15426                                                | 2 %               | 2306 (1962; 2686)       | 111 (47; 219)               | 11 (5; 22)             | 23 (12; 35)      | 2104744 (0.18) |                                                    |
|              | 1.5        | 10926                                                | 1 %               | 1633 (1390; 1903)       | 79 (33; 155)                | 8 (3; 16)              | 17 (9; 25)       | 2000221 (0.19) |                                                    |
|              | 2          | 7776                                                 | 1 %               | 1162 (989; 1354)        | 56 (24; 110)                | 6 (2; 11)              | 12 (6; 18)       | 1923166 (0.2)  |                                                    |
|              | 4          | 6390                                                 | 1 %               | 955 (813; 1113)         | 46 (19; 91)                 | 5 (2; 9)               | 10 (5; 14)       | 1798067 (0.21) |                                                    |
| 90%          | 0.5        | 34289                                                | 4 %               | 5125 (4361; 5971)       | 247 (104; 486)              | 24 (10; 49)            | 52 (27; 78)      | 2402402 (0.16) |                                                    |
|              | 1          | 20909                                                | 3 %               | 3125 (2659; 3641)       | 151 (63; 297)               | 15 (6; 30)             | 32 (17; 47)      | 2301410 (0.17) |                                                    |
|              | 1.5        | 15831                                                | 2 %               | 2366 (2014; 2757)       | 114 (48; 225)               | 11 (5; 23)             | 24 (13; 36)      | 2186747 (0.17) |                                                    |
|              | 2          | 12265                                                | 2 %               | 1833 (1560; 2136)       | 88 (37; 174)                | 9 (4; 18)              | 19 (10; 28)      | 2101984 (0.18) |                                                    |
|              | 4          | 10691                                                | 1 %               | 1598 (1360; 1862)       | 77 (32; 152)                | 8 (3; 15)              | 16 (9; 24)       | 1962808 (0.19) |                                                    |
| *65%         | 4          | 789919                                               |                   | 118074 (100472; 137557) | 5689 (2395; 11204)          | 564 (232; 1133)        | 1198 (628; 1786) | 1546131 (0.25) |                                                    |

\* This is the baseline intervention; values are reported in absolute terms, and not in terms of avoided cases.

ii. Costs and effects (R\_0 = 1.4, 1.6, 1.8)

Table S82: Moderate pandemic influenza with R\_0=1.4: costs and benefits associated with each sick leave intervention relative to the baseline, assuming 35% of children and 25% of adults are symptomatic, and with extra mixing.

| Intervention |           | Mean costs (1000 USD) |                  |                   |                          |                          | Mean benefits |             |            | Output measures  |                                    |      |
|--------------|-----------|-----------------------|------------------|-------------------|--------------------------|--------------------------|---------------|-------------|------------|------------------|------------------------------------|------|
| % on leave   | Max. days | Productivity losses   | Cost of campaign | GP-visits avoided | Hospitalisations avoided | Medication costs avoided | Total costs   | QALYs saved | YPLL saved | Mean NHB (QALYs) | Median NHB (0.25; 0.75 percentile) | Rank |
| 65 %         | 0.5       | 46742                 | 3227             | 242               | 1892                     | 252                      | 47583         | 376         | 98         | -110             | -214 (-306; -46)                   | 4    |
|              | 1         | 44083                 | 2411             | 106               | 826                      | 110                      | 45453         | 164         | 43         | -300             | -345 (-385; -271)                  | 9    |
|              | 1.5       | 30851                 | 1757             | 53                | 416                      | 55                       | 32084         | 83          | 21         | -245             | -267 (-288; -230)                  | 7    |
|              | 2         | 20797                 | 1234             | 16                | 127                      | 17                       | 21872         | 25          | 7          | -198             | -204 (-211; -192)                  | 6    |
| 80 %         | 0.5       | 63938                 | 5276             | 382               | 3005                     | 397                      | 65430         | 602         | 154        | -65              | -239 (-382; 32)                    | 2    |
|              | 1         | 65234                 | 4456             | 216               | 1702                     | 225                      | 67547         | 341         | 87         | -348             | -445 (-528; -292)                  | 12   |
|              | 1.5       | 52208                 | 3799             | 153               | 1201                     | 159                      | 54495         | 240         | 61         | -315             | -382 (-442; -273)                  | 10   |
|              | 2         | 42127                 | 3274             | 108               | 849                      | 112                      | 44332         | 170         | 43         | -282             | -327 (-372; -250)                  | 8    |
|              | **4       | 19675                 | 2034             | 88                | 688                      | 92                       | 20841         | 136         | 35         | -76              | -110 (-149; -47)                   | 3    |
| 90 %         | 0.5       | 73763                 | 6721             | 476               | 3739                     | 494                      | 75775         | 749         | 191        | -24              | -238 (-417; 99)                    | 1    |
|              | 1         | 78088                 | 5901             | 290               | 2284                     | 302                      | 81112         | 457         | 116        | -370             | -497 (-611; -290)                  | 14   |
|              | 1.5       | 65389                 | 5244             | 219               | 1725                     | 228                      | 68461         | 345         | 88         | -353             | -446 (-535; -289)                  | 13   |
|              | 2         | 55438                 | 4719             | 169               | 1332                     | 176                      | 58480         | 266         | 68         | -330             | -399 (-472; -279)                  | 11   |
|              | 4         | 31977                 | 3479             | 147               | 1149                     | 153                      | 34007         | 228         | 59         | -119             | -175 (-241; -71)                   | 5    |
| *65 %        | 4         | 354496                | 0                | 4852              | 37702                    | 5050                     | 402100        | 7585        | 2020       | 14294            | 12205 (10376; 15582)               |      |

\*Baseline intervention; values reported as absolute gains and losses.

\*\*optimal intervention.

**Table S83: Moderate pandemic influenza with R<sub>0</sub>=1.6: costs and benefits associated with each sick leave intervention relative to the baseline, assuming 35% of children and 25% of adults are symptomatic, and with extra mixing.**

| Intervention |           | Mean costs (1000 USD) |                  |                   |                          |                          | Mean benefits |             |            | Output measures  |                                    |      |
|--------------|-----------|-----------------------|------------------|-------------------|--------------------------|--------------------------|---------------|-------------|------------|------------------|------------------------------------|------|
| % on leave   | Max. days | Productivity losses   | Cost of campaign | GP-visits avoided | Hospitalisations avoided | Medication costs avoided | Total costs   | QALYs saved | YPLL saved | Mean NHB (QALYs) | Median NHB (0.25; 0.75 percentile) | Rank |
| 65 %         | 0.5       | 85707                 | 3227             | 205               | 1601                     | 213                      | 86915         | 316         | 81         | -570             | -658 (-736; -516)                  | 6    |
|              | 1         | 70493                 | 2411             | 89                | 697                      | 93                       | 72025         | 138         | 35         | -597             | -633 (-669; -570)                  | 7    |
|              | 1.5       | 47556                 | 1757             | 45                | 350                      | 47                       | 48872         | 69          | 18         | -429             | -447 (-466; -415)                  | 4    |
|              | 2         | 30511                 | 1234             | 14                | 107                      | 14                       | 31611         | 21          | 5          | -301             | -306 (-314; -295)                  | 2    |
| 80 %         | 0.5       | 122785                | 5276             | 328               | 2579                     | 341                      | 124814        | 514         | 129        | -759             | -907 (-1031; -673)                 | 10   |
|              | 1         | 109802                | 4456             | 186               | 1461                     | 193                      | 112417        | 291         | 73         | -855             | -936 (-1010; -804)                 | 11   |
|              | 1.5       | 85761                 | 3799             | 131               | 1033                     | 137                      | 88259         | 206         | 51         | -694             | -749 (-804; -655)                  | 8    |
|              | 2         | 67729                 | 3274             | 93                | 734                      | 97                       | 70079         | 146         | 36         | -569             | -603 (-648; -536)                  | 5    |
|              | **4       | 34275                 | 2034             | 76                | 597                      | 79                       | 35556         | 118         | 30         | -245             | -270 (-313; -212)                  | 1    |
| 90 %         | 0.5       | 145799                | 6721             | 411               | 3232                     | 427                      | 148450        | 644         | 161        | -870             | -1049 (-1211; -759)                | 13   |
|              | 1         | 134773                | 5901             | 251               | 1972                     | 261                      | 138190        | 393         | 98         | -1016            | -1121 (-1225; -942)                | 14   |
|              | 1.5       | 110178                | 5244             | 190               | 1492                     | 197                      | 113544        | 297         | 74         | -861             | -936 (-1021; -799)                 | 12   |
|              | 2         | 91654                 | 4719             | 147               | 1155                     | 153                      | 94919         | 230         | 57         | -738             | -790 (-866; -683)                  | 9    |
|              | 4         | 56345                 | 3479             | 128               | 998                      | 133                      | 58565         | 197         | 50         | -401             | -442 (-513; -346)                  | 3    |
| *65 %        | 4         | 491494                | 0                | 6718              | 52209                    | 7004                     | 557425        | 10481       | 2771       | 19837            | 16940 (14410; 21625)               |      |

\*Baseline intervention; values reported as absolute gains and losses.

\*\*optimal intervention.

**Table S84: Moderate pandemic influenza with R\_0=1.8: costs and benefits associated with each sick leave intervention relative to the baseline, assuming 35% of children and 25% of adults are symptomatic, and with extra mixing.**

| Intervention |           | Mean costs (1000 USD) |                  |                   |                          |                          | Mean benefits |             |            | Output measures  |                                    |      |
|--------------|-----------|-----------------------|------------------|-------------------|--------------------------|--------------------------|---------------|-------------|------------|------------------|------------------------------------|------|
| % on leave   | Max. days | Productivity losses   | Cost of campaign | GP-visits avoided | Hospitalisations avoided | Medication costs avoided | Total costs   | QALYs saved | YPLL saved | Mean NHB (QALYs) | Median NHB (0.25; 0.75 percentile) | Rank |
| 65 %         | 0.5       | 115807                | 3227             | 173               | 1349                     | 180                      | 117333        | 265         | 67         | -931             | -1003 (-1071; -882)                | 7    |
|              | 1         | 90622                 | 2411             | 75                | 586                      | 78                       | 92293         | 115         | 29         | -826             | -854 (-888; -801)                  | 6    |
|              | 1.5       | 60213                 | 1757             | 38                | 294                      | 39                       | 61599         | 58          | 15         | -570             | -584 (-602; -556)                  | 3    |
|              | **2       | 37810                 | 1234             | 12                | 90                       | 12                       | 38931         | 18          | 4          | -379             | -382 (-391; -371)                  | 1    |
| 80 %         | 0.5       | 168768                | 5276             | 279               | 2193                     | 290                      | 171282        | 436         | 108        | -1311            | -1436 (-1542; -1238)               | 12   |
|              | 1         | 144208                | 4456             | 158               | 1242                     | 164                      | 147099        | 247         | 61         | -1254            | -1321 (-1385; -1207)               | 10   |
|              | 1.5       | 111582                | 3799             | 112               | 879                      | 116                      | 114273        | 175         | 43         | -991             | -1033 (-1086; -953)                | 8    |
|              | 2         | 87419                 | 3274             | 80                | 626                      | 83                       | 89905         | 124         | 31         | -793             | -819 (-865; -758)                  | 5    |
|              | 4         | 45642                 | 2034             | 65                | 511                      | 68                       | 47031         | 100         | 25         | -379             | -397 (-442; -342)                  | 2    |
| 90 %         | 0.5       | 202456                | 6721             | 351               | 2760                     | 365                      | 205701        | 548         | 135        | -1550            | -1699 (-1841; -1448)               | 14   |
|              | 1         | 178778                | 5901             | 214               | 1683                     | 223                      | 182560        | 334         | 82         | -1528            | -1611 (-1709; -1456)               | 13   |
|              | 1.5       | 144865                | 5244             | 162               | 1274                     | 169                      | 148505        | 253         | 62         | -1262            | -1318 (-1404; -1197)               | 11   |
|              | 2         | 119663                | 4719             | 126               | 987                      | 131                      | 123139        | 196         | 48         | -1060            | -1099 (-1177; -1000)               | 9    |
|              | 4         | 75366                 | 3479             | 109               | 854                      | 114                      | 77768         | 168         | 42         | -625             | -655 (-730; -563)                  | 4    |
| *65 %        | 4         | 591411                | 0                | 8085              | 62831                    | 8442                     | 670769        | 12591       | 3308       | 23896            | 20409 (17366; 26048)               |      |

\*Baseline intervention; values reported as absolute gains and losses.  
 \*\*optimal intervention.

## C. Severe pandemic

### i. Epidemiology ( $R_0 = 1.4, 1.6, 1.8$ )

**Table S85: Severe pandemic influenza with  $R_0=1.4$ : number of avoided cases, GP-visits, hospitalizations, and deaths associated with each sick leave intervention, assuming 35% of children and 25% adults are symptomatic, and with extra mixing.**

| Intervention |            | Median (0.25; 0.75 percentiles) relative to baseline |                   |                       |                             |                        |                  |                | Mean workdays lost (proportion lost to caregiving) |
|--------------|------------|------------------------------------------------------|-------------------|-----------------------|-----------------------------|------------------------|------------------|----------------|----------------------------------------------------|
| % on leave   | Delay time | Symptomatic cases avoided                            | % Reduction in AR | GP-visits avoided     | Hospital admissions avoided | ICU admissions avoided | Avoided Deaths   |                |                                                    |
| 65%          | 0.5        | 23680                                                | 5 %               | 4723 (4126; 5372)     | 466 (285; 714)              | 79 (48; 123)           | 53 (28; 79)      | 1091114 (0.22) |                                                    |
|              | 1          | 10333                                                | 2 %               | 2061 (1801; 2344)     | 203 (124; 312)              | 34 (21; 54)            | 23 (12; 34)      | 1061695 (0.23) |                                                    |
|              | 1.5        | 5204                                                 | 1 %               | 1038 (907; 1180)      | 102 (63; 157)               | 17 (10; 27)            | 12 (6; 17)       | 1017657 (0.24) |                                                    |
|              | 2          | 1589                                                 | 0 %               | 317 (277; 360)        | 31 (19; 48)                 | 5 (3; 8)               | 4 (2; 5)         | 984649 (0.25)  |                                                    |
| 80%          | 0.5        | 37330                                                | 8 %               | 7446 (6505; 8468)     | 735 (449; 1126)             | 125 (75; 193)          | 84 (44; 124)     | 1245268 (0.19) |                                                    |
|              | 1          | 21139                                                | 4 %               | 4217 (3684; 4795)     | 416 (254; 638)              | 71 (42; 109)           | 47 (25; 70)      | 1218869 (0.2)  |                                                    |
|              | 1.5        | 14921                                                | 3 %               | 2976 (2600; 3385)     | 294 (179; 450)              | 50 (30; 77)            | 33 (18; 50)      | 1169106 (0.21) |                                                    |
|              | 2          | 10551                                                | 2 %               | 2105 (1839; 2393)     | 208 (127; 318)              | 35 (21; 55)            | 24 (12; 35)      | 1131402 (0.22) |                                                    |
|              | 4          | 8612                                                 | 2 %               | 1718 (1501; 1954)     | 169 (104; 260)              | 29 (17; 45)            | 19 (10; 29)      | 1061979 (0.23) |                                                    |
| 90%          | 0.5        | 46457                                                | 10 %              | 9267 (8095; 10538)    | 914 (558; 1401)             | 155 (93; 241)          | 104 (55; 155)    | 1340089 (0.17) |                                                    |
|              | 1          | 28380                                                | 6 %               | 5661 (4945; 6438)     | 559 (341; 856)              | 95 (57; 147)           | 63 (33; 95)      | 1317710 (0.18) |                                                    |
|              | 1.5        | 21436                                                | 5 %               | 4276 (3735; 4863)     | 422 (258; 647)              | 72 (43; 111)           | 48 (25; 71)      | 1265066 (0.19) |                                                    |
|              | 2          | 16549                                                | 3 %               | 3301 (2884; 3754)     | 326 (199; 499)              | 55 (33; 86)            | 37 (19; 55)      | 1224887 (0.2)  |                                                    |
|              | 4          | 14382                                                | 3 %               | 2869 (2506; 3262)     | 283 (173; 434)              | 48 (29; 74)            | 32 (17; 48)      | 1148598 (0.21) |                                                    |
| *65%         | 4          | 473995                                               |                   | 94548 (82595; 107523) | 9328 (5698; 14296)          | 1581 (951; 2455)       | 1060 (556; 1580) | 926264 (0.27)  |                                                    |

\* This is the baseline intervention; values are reported in absolute terms, and not in terms of avoided cases.



**Table S86: Severe pandemic influenza with R<sub>0</sub>=1.6: number of avoided cases, GP-visits, hospitalizations, and deaths associated with each sick leave intervention, assuming 35% of children and 25% adults are symptomatic, and with extra mixing.**

| Intervention |            |                           |                   | Median (0.25; 0.75 percentiles) relative to baseline |                             |                        |                  |                | Mean workdays lost (proportion lost to caregiving) |
|--------------|------------|---------------------------|-------------------|------------------------------------------------------|-----------------------------|------------------------|------------------|----------------|----------------------------------------------------|
| % on leave   | Delay time | Symptomatic cases avoided | % Reduction in AR | GP-visits avoided                                    | Hospital admissions avoided | ICU admissions avoided | Avoided Deaths   |                |                                                    |
| 65%          | 0.5        | 20039                     | 3 %               | 3997 (3492; 4546)                                    | 394 (241; 604)              | 67 (40; 104)           | 45 (24; 67)      | 1549465 (0.21) |                                                    |
|              | 1          | 8717                      | 1 %               | 1739 (1519; 1977)                                    | 172 (105; 263)              | 29 (17; 45)            | 19 (10; 29)      | 1488842 (0.22) |                                                    |
|              | 1.5        | 4384                      | 1 %               | 874 (764; 994)                                       | 86 (53; 132)                | 15 (9; 23)             | 10 (5; 15)       | 1419781 (0.23) |                                                    |
|              | 2          | 1337                      | 0 %               | 267 (233; 303)                                       | 26 (16; 40)                 | 4 (3; 7)               | 3 (2; 4)         | 1368763 (0.24) |                                                    |
| 80%          | 0.5        | 32035                     | 5 %               | 6390 (5582; 7267)                                    | 630 (385; 966)              | 107 (64; 166)          | 72 (38; 107)     | 1793784 (0.18) |                                                    |
|              | 1          | 18150                     | 3 %               | 3620 (3163; 4117)                                    | 357 (218; 547)              | 61 (36; 94)            | 41 (21; 61)      | 1728621 (0.19) |                                                    |
|              | 1.5        | 12830                     | 2 %               | 2559 (2236; 2910)                                    | 252 (154; 387)              | 43 (26; 66)            | 29 (15; 43)      | 1647861 (0.2)  |                                                    |
|              | 2          | 9113                      | 1 %               | 1818 (1588; 2067)                                    | 179 (110; 275)              | 30 (18; 47)            | 20 (11; 30)      | 1587806 (0.21) |                                                    |
| 90%          | 4          | 7466                      | 1 %               | 1489 (1301; 1694)                                    | 147 (90; 225)               | 25 (15; 39)            | 17 (9; 25)       | 1486602 (0.22) |                                                    |
|              | 0.5        | 40148                     | 6 %               | 8008 (6996; 9107)                                    | 790 (483; 1211)             | 134 (81; 208)          | 90 (47; 134)     | 1948910 (0.16) |                                                    |
|              | 1          | 24504                     | 4 %               | 4888 (4270; 5559)                                    | 482 (295; 739)              | 82 (49; 127)           | 55 (29; 82)      | 1882837 (0.17) |                                                    |
|              | 1.5        | 18532                     | 3 %               | 3697 (3229; 4204)                                    | 365 (223; 559)              | 62 (37; 96)            | 41 (22; 62)      | 1795165 (0.18) |                                                    |
| *65%         | 2          | 14344                     | 2 %               | 2861 (2499; 3254)                                    | 282 (172; 433)              | 48 (29; 74)            | 32 (17; 48)      | 1729744 (0.19) |                                                    |
|              | 4          | 12494                     | 2 %               | 2492 (2177; 2834)                                    | 246 (150; 377)              | 42 (25; 65)            | 28 (15; 42)      | 1617599 (0.2)  |                                                    |
|              |            | 656378                    |                   | 130928 (114375; 148895)                              | 12917 (7891; 19796)         | 2190 (1317; 3400)      | 1468 (770; 2188) | 1284699 (0.26) |                                                    |

\* This is the baseline intervention; values are reported in absolute terms, and not in terms of avoided cases.

**Table S87: Severe pandemic influenza with R<sub>0</sub>=1.8: number of avoided cases, GP-visits, hospitalizations, and deaths associated with each sick leave intervention, assuming 35% of children and 25% adults are symptomatic, and with extra mixing.**

| Intervention |            | Median (0.25; 0.75 percentiles) relative to baseline |                   |                         |                             |                        |                  | Mean workdays lost (proportion lost to caregiving) |
|--------------|------------|------------------------------------------------------|-------------------|-------------------------|-----------------------------|------------------------|------------------|----------------------------------------------------|
| % on leave   | Delay time | Symptomatic cases avoided                            | % Reduction in AR | GP-visits avoided       | Hospital admissions avoided | ICU admissions avoided | Avoided Deaths   |                                                    |
| 65%          | 0.5        | 34289                                                | 4 %               | 3368 (2942; 3830)       | 332 (203; 509)              | 56 (34; 87)            | 38 (20; 56)      | 2402399 (0.2)                                      |
|              | 1          | 20909                                                | 3 %               | 1462 (1277; 1663)       | 144 (88; 221)               | 24 (15; 38)            | 16 (9; 24)       | 2301407 (0.21)                                     |
|              | 1.5        | 15831                                                | 2 %               | 735 (642; 835)          | 72 (44; 111)                | 12 (7; 19)             | 8 (4; 12)        | 2186744 (0.22)                                     |
|              | 2          | 12265                                                | 2 %               | 226 (197; 257)          | 22 (14; 34)                 | 4 (2; 6)               | 3 (1; 4)         | 2101981 (0.23)                                     |
| 80%          | 0.5        | 10691                                                | 1 %               | 5435 (4748; 6181)       | 536 (328; 822)              | 91 (55; 141)           | 61 (32; 91)      | 1962805 (0.17)                                     |
|              | 1          | 27246                                                | 3 %               | 3077 (2688; 3499)       | 304 (185; 465)              | 51 (31; 80)            | 35 (18; 51)      | 2200449 (0.18)                                     |
|              | 1.5        | 15426                                                | 2 %               | 2179 (1904; 2478)       | 215 (131; 330)              | 36 (22; 57)            | 24 (13; 36)      | 2104741 (0.19)                                     |
|              | 2          | 10926                                                | 1 %               | 1551 (1355; 1764)       | 153 (93; 235)               | 26 (16; 40)            | 17 (9; 26)       | 2000218 (0.2)                                      |
| 90%          | 4          | 7776                                                 | 1 %               | 1275 (1113; 1450)       | 126 (77; 193)               | 21 (13; 33)            | 14 (7; 21)       | 1923163 (0.21)                                     |
|              | 0.5        | 6390                                                 | 1 %               | 6840 (5975; 7778)       | 675 (412; 1034)             | 114 (69; 178)          | 77 (40; 114)     | 1798064 (0.16)                                     |
|              | 1          | 16883                                                | 2 %               | 4171 (3643; 4743)       | 411 (251; 631)              | 70 (42; 108)           | 47 (25; 70)      | 1886848 (0.17)                                     |
|              | 1.5        | 7331                                                 | 1 %               | 3158 (2759; 3591)       | 312 (190; 477)              | 53 (32; 82)            | 35 (19; 53)      | 1802058 (0.17)                                     |
| *65%         | 2          | 3683                                                 | 0 %               | 2447 (2137; 2782)       | 241 (147; 370)              | 41 (25; 64)            | 27 (14; 41)      | 1714027 (0.18)                                     |
|              | 4          | 1131                                                 | 0 %               | 2133 (1863; 2425)       | 210 (129; 322)              | 36 (21; 55)            | 24 (13; 36)      | 1649390 (0.19)                                     |
| *65%         |            | 4                                                    | 789919            | 157566 (137645; 179188) | 15546 (9496; 23824)         | 2635 (1585; 4092)      | 1767 (927; 2634) | 1546128 (0.25)                                     |

\* This is the baseline intervention; values are reported in absolute terms, and not in terms of avoided cases.

ii. Costs and effects (R\_0 = 1.4, 1.6, 1.8)

Table S88: Severe pandemic influenza with R\_0=1.4: costs and benefits associated with each sick leave intervention relative to the baseline, assuming 35% of children and 25% of adults are symptomatic, and with extra mixing.

| Intervention |           | Mean costs (1000 USD) |                  |                   |                          |                          | Mean benefits |             |            | Output measures  |                                    |      |
|--------------|-----------|-----------------------|------------------|-------------------|--------------------------|--------------------------|---------------|-------------|------------|------------------|------------------------------------|------|
| % on leave   | Max. days | Productivity losses   | Cost of campaign | GP-visits avoided | Hospitalisations avoided | Medication costs avoided | Total costs   | QALYs saved | YPLL saved | Mean NHB (QALYs) | Median NHB (0.25; 0.75 percentile) | Rank |
| 65 %         | 0.5       | 46739                 | 3228             | 323               | 5395                     | 264                      | 43984         | 417         | 144        | -31              | -133 (-231; 39)                    | 3    |
|              | 1         | 44080                 | 2411             | 141               | 2354                     | 115                      | 43880         | 182         | 63         | -265             | -309 (-352; -234)                  | 9    |
|              | 1.5       | 30849                 | 1757             | 71                | 1186                     | 58                       | 31292         | 92          | 32         | -227             | -249 (-271; -211)                  | 7    |
|              | 2         | 20795                 | 1235             | 22                | 362                      | 18                       | 21629         | 28          | 10         | -193             | -198 (-206; -187)                  | 6    |
| 80 %         | 0.5       | 63933                 | 5275             | 510               | 8531                     | 417                      | 59751         | 669         | 227        | 59               | -111 (-263; 162)                   | 2    |
|              | 1         | 65229                 | 4455             | 289               | 4831                     | 236                      | 64328         | 378         | 128        | -278             | -372 (-461; -218)                  | 13   |
|              | 1.5       | 52203                 | 3799             | 204               | 3410                     | 167                      | 52221         | 267         | 90         | -266             | -331 (-395; -222)                  | 10   |
|              | 2         | 42121                 | 3274             | 144               | 2411                     | 118                      | 42722         | 189         | 64         | -247             | -291 (-339; -214)                  | 8    |
|              | 4         | 19685                 | 2034             | 118               | 1962                     | 96                       | 19543         | 151         | 52         | -48              | -80 (-122; -17)                    | 4    |
| 90 %         | **0.5     | 73753                 | 6720             | 634               | 10617                    | 519                      | 68703         | 832         | 282        | 131              | -76 (-270; 260)                    | 1    |
|              | 1         | 78078                 | 5900             | 387               | 6486                     | 317                      | 76788         | 508         | 172        | -275             | -399 (-521; -193)                  | 12   |
|              | 1.5       | 65379                 | 5244             | 293               | 4899                     | 239                      | 65192         | 383         | 129        | -281             | -372 (-467; -216)                  | 14   |
|              | 2         | 55427                 | 4719             | 226               | 3782                     | 185                      | 55954         | 296         | 100        | -275             | -342 (-419; -221)                  | 11   |
|              | 4         | 31994                 | 3480             | 196               | 3277                     | 161                      | 31840         | 253         | 87         | -72              | -125 (-196; -21)                   | 5    |
| *65 %        | 4         | 354496                | 0                | 6471              | 108007                   | 5301                     | 474275        | 8447        | 2980       | 15892            | 13890 (11949; 17317)               |      |

\*Baseline intervention; values reported as absolute gains and losses.

\*\*optimal intervention.

**Table S89: Severe pandemic influenza with R<sub>0</sub>=1.6: costs and benefits associated with each sick leave intervention relative to the baseline, assuming 35% of children and 25% of adults are symptomatic, and with extra mixing.**

| Intervention |           | Mean costs (1000 USD) |                  |                   |                          |                          | Mean benefits |             |            | Output measures  |                                    |      |
|--------------|-----------|-----------------------|------------------|-------------------|--------------------------|--------------------------|---------------|-------------|------------|------------------|------------------------------------|------|
| % on leave   | Max. days | Productivity losses   | Cost of campaign | GP-visits avoided | Hospitalisations avoided | Medication costs avoided | Total costs   | QALYs saved | YPLL saved | Mean NHB (QALYs) | Median NHB (0.25; 0.75 percentile) | Rank |
| 65 %         | 0.5       | 85700                 | 3228             | 274               | 4565                     | 224                      | 83865         | 351         | 119        | -504             | -590 (-673; -444)                  | 5    |
|              | 1         | 70487                 | 2411             | 119               | 1986                     | 97                       | 70696         | 153         | 52         | -568             | -604 (-642; -540)                  | 7    |
|              | 1.5       | 47552                 | 1757             | 60                | 999                      | 49                       | 48202         | 77          | 26         | -415             | -432 (-452; -400)                  | 4    |
|              | 2         | 30509                 | 1235             | 18                | 305                      | 15                       | 31405         | 23          | 8          | -297             | -301 (-309; -290)                  | 2    |
| 80 %         | 0.5       | 122778                | 5275             | 437               | 7321                     | 358                      | 119937        | 570         | 190        | -653             | -797 (-930; -565)                  | 9    |
|              | 1         | 109795                | 4455             | 248               | 4148                     | 203                      | 109651        | 323         | 107        | -795             | -874 (-953; -743)                  | 12   |
|              | 1.5       | 85753                 | 3799             | 175               | 2932                     | 143                      | 86301         | 228         | 76         | -652             | -705 (-764; -611)                  | 8    |
|              | 2         | 67721                 | 3274             | 124               | 2083                     | 102                      | 68686         | 162         | 54         | -539             | -572 (-620; -504)                  | 6    |
|              | **4       | 34288                 | 2034             | 102               | 1701                     | 83                       | 34436         | 130         | 44         | -221             | -245 (-289; -186)                  | 1    |
| 90 %         | 0.5       | 145785                | 6720             | 548               | 9175                     | 449                      | 142334        | 714         | 238        | -737             | -913 (-1086; -621)                 | 11   |
|              | 1         | 134759                | 5900             | 335               | 5600                     | 274                      | 134451        | 436         | 145        | -935             | -1037 (-1149; -858)                | 14   |
|              | 1.5       | 110164                | 5244             | 253               | 4235                     | 207                      | 110713        | 329         | 109        | -800             | -872 (-964; -735)                  | 13   |
|              | 2         | 91640                 | 4719             | 196               | 3278                     | 160                      | 92725         | 255         | 84         | -691             | -742 (-822; -633)                  | 10   |
|              | 4         | 56367                 | 3480             | 171               | 2846                     | 140                      | 56691         | 218         | 73         | -360             | -401 (-474; -303)                  | 3    |
| *65 %        | 4         | 491495                | 0                | 8961              | 149566                   | 7353                     | 657375        | 11664       | 4087       | 22040            | 19275 (16578; 24007)               |      |

\*Baseline intervention; values reported as absolute gains and losses.

\*\*optimal intervention.

**Table S90: Severe pandemic influenza with R<sub>0</sub>=1.8: costs and benefits associated with each sick leave intervention relative to the baseline, assuming 35% of children and 25% of adults are symptomatic, and with extra mixing.**

| Intervention |           | Mean costs (1000 USD) |                  |                   |                          |                          | Mean benefits |             |            | Output measures  |                                    |      |
|--------------|-----------|-----------------------|------------------|-------------------|--------------------------|--------------------------|---------------|-------------|------------|------------------|------------------------------------|------|
| % on leave   | Max. days | Productivity losses   | Cost of campaign | GP-visits avoided | Hospitalisations avoided | Medication costs avoided | Total costs   | QALYs saved | YPLL saved | Mean NHB (QALYs) | Median NHB (0.25; 0.75 percentile) | Rank |
| 65 %         | 0.5       | 115798                | 3228             | 231               | 3846                     | 189                      | 114760        | 294         | 99         | -876             | -946 (-1019; -823)                 | 7    |
|              | 1         | 90614                 | 2411             | 100               | 1670                     | 82                       | 91173         | 128         | 43         | -802             | -830 (-865; -776)                  | 6    |
|              | 1.5       | 60208                 | 1757             | 50                | 839                      | 41                       | 61035         | 64          | 22         | -558             | -571 (-591; -543)                  | 3    |
|              | 2         | 37807                 | 1235             | 15                | 258                      | 13                       | 38756         | 20          | 7          | -376             | -379 (-387; -368)                  | 2    |
| 80 %         | 0.5       | 168761                | 5275             | 372               | 6226                     | 305                      | 167133        | 483         | 159        | -1222            | -1342 (-1458; -1145)               | 12   |
|              | 1         | 144200                | 4455             | 211               | 3525                     | 172                      | 144746        | 273         | 90         | -1203            | -1267 (-1338; -1155)               | 10   |
|              | 1.5       | 111573                | 3799             | 149               | 2497                     | 122                      | 112603        | 193         | 63         | -955             | -997 (-1052; -915)                 | 8    |
|              | 2         | 87410                 | 3274             | 106               | 1777                     | 87                       | 88713         | 137         | 45         | -767             | -793 (-841; -732)                  | 5    |
|              | **4       | 45658                 | 2034             | 87                | 1456                     | 71                       | 46078         | 111         | 37         | -359             | -376 (-423; -321)                  | 1    |
| 90 %         | 0.5       | 202439                | 6720             | 468               | 7836                     | 383                      | 200472        | 607         | 200        | -1437            | -1583 (-1735; -1334)               | 13   |
|              | 1         | 178762                | 5900             | 285               | 4778                     | 234                      | 179364        | 370         | 121        | -1459            | -1540 (-1645; -1384)               | 14   |
|              | 1.5       | 144848                | 5244             | 216               | 3618                     | 177                      | 146081        | 280         | 92         | -1210            | -1264 (-1356; -1143)               | 11   |
|              | 2         | 119646                | 4719             | 167               | 2803                     | 137                      | 121257        | 217         | 71         | -1020            | -1057 (-1139; -957)                | 9    |
|              | 4         | 75394                 | 3480             | 146               | 2436                     | 120                      | 76172         | 186         | 62         | -591             | -620 (-698; -528)                  | 4    |
| *65 %        | 4         | 591413                | 0                | 10785             | 179995                   | 8862                     | 791055        | 14004       | 4879       | 26536            | 23208 (19961; 28896)               |      |

\*Baseline intervention; values reported as absolute gains and losses.

\*\*optimal intervention.

## D. Very severe pandemic

### i. Epidemiology ( $R_0 = 1.4, 1.6, 1.8$ )

**Table S91: Very severe pandemic influenza with  $R_0=1.4$ : number of avoided cases, GP-visits, hospitalizations, and deaths associated with each sick leave intervention, assuming 35% of children and 25% adults are symptomatic, and with extra mixing.**

| Intervention |            | Median (0.25; 0.75 percentiles) relative to baseline |                   |                         |                             |                        |                   |                | Mean workdays lost (proportion lost to caregiving) |
|--------------|------------|------------------------------------------------------|-------------------|-------------------------|-----------------------------|------------------------|-------------------|----------------|----------------------------------------------------|
| % on leave   | Delay time | Symptomatic cases avoided                            | % Reduction in AR | GP-visits avoided       | Hospital admissions avoided | ICU admissions avoided | Avoided Deaths    |                |                                                    |
| 65%          | 0.5        | 23680                                                | 5 %               | 5908 (5259; 6605)       | 821 (573; 1137)             | 205 (141; 287)         | 165 (86; 246)     | 1091111 (0.22) |                                                    |
|              | 1          | 10333                                                | 2 %               | 2578 (2295; 2882)       | 358 (250; 496)              | 89 (61; 125)           | 72 (38; 107)      | 1061692 (0.23) |                                                    |
|              | 1.5        | 5204                                                 | 1 %               | 1298 (1156; 1451)       | 180 (126; 250)              | 45 (31; 63)            | 36 (19; 54)       | 1017653 (0.24) |                                                    |
|              | 2          | 1589                                                 | 0 %               | 396 (353; 443)          | 55 (38; 76)                 | 14 (9; 19)             | 11 (6; 16)        | 984645 (0.25)  |                                                    |
| 80%          | 0.5        | 37330                                                | 8 %               | 9314 (8290; 10412)      | 1294 (903; 1792)            | 323 (222; 453)         | 260 (136; 387)    | 1245265 (0.19) |                                                    |
|              | 1          | 21139                                                | 4 %               | 5274 (4695; 5896)       | 733 (511; 1015)             | 183 (126; 257)         | 147 (77; 219)     | 1218865 (0.2)  |                                                    |
|              | 1.5        | 14921                                                | 3 %               | 3723 (3314; 4162)       | 517 (361; 716)              | 129 (89; 181)          | 104 (54; 155)     | 1169102 (0.21) |                                                    |
|              | 2          | 10551                                                | 2 %               | 2633 (2343; 2943)       | 366 (255; 507)              | 91 (63; 128)           | 74 (39; 109)      | 1131398 (0.22) |                                                    |
|              | 4          | 8612                                                 | 2 %               | 2149 (1913; 2402)       | 299 (208; 413)              | 74 (51; 105)           | 60 (31; 89)       | 1061975 (0.23) |                                                    |
| 90%          | 0.5        | 46457                                                | 10 %              | 11591 (10317; 12957)    | 1611 (1123; 2230)           | 402 (276; 564)         | 324 (170; 482)    | 1340086 (0.17) |                                                    |
|              | 1          | 28380                                                | 6 %               | 7081 (6303; 7916)       | 984 (686; 1363)             | 245 (169; 344)         | 198 (104; 294)    | 1317707 (0.18) |                                                    |
|              | 1.5        | 21436                                                | 5 %               | 5348 (4761; 5979)       | 743 (518; 1029)             | 185 (127; 260)         | 149 (78; 222)     | 1265062 (0.19) |                                                    |
|              | 2          | 16549                                                | 3 %               | 4129 (3675; 4616)       | 574 (400; 795)              | 143 (98; 201)          | 115 (60; 172)     | 1224884 (0.2)  |                                                    |
|              | 4          | 14382                                                | 3 %               | 3588 (3194; 4011)       | 499 (348; 690)              | 124 (85; 175)          | 100 (53; 149)     | 1148594 (0.21) |                                                    |
| *65%         | 4          | 473995                                               |                   | 118264 (105267; 132204) | 16433 (11462; 22757)        | 4097 (2814; 5752)      | 3305 (1731; 4919) | 926260 (0.27)  |                                                    |

\* This is the baseline intervention; values are reported in absolute terms, and not in terms of avoided cases.

**Table S92: Very severe pandemic influenza with R<sub>0</sub>=1.6: number of avoided cases, GP-visits, hospitalizations, and deaths associated with each sick leave intervention, assuming 35% of children and 25% adults are symptomatic, and with extra mixing.**

| Intervention |            | Median (0.25; 0.75 percentiles) relative to baseline |                   |                         |                             |                        |                   |                | Mean workdays lost (proportion lost to caregiving) |
|--------------|------------|------------------------------------------------------|-------------------|-------------------------|-----------------------------|------------------------|-------------------|----------------|----------------------------------------------------|
| % on leave   | Delay time | Symptomatic cases avoided                            | % Reduction in AR | GP-visits avoided       | Hospital admissions avoided | ICU admissions avoided | Avoided Deaths    |                |                                                    |
| 65%          | 0.5        | 20039                                                | 3 %               | 5000 (4450; 5589)       | 695 (485; 962)              | 173 (119; 243)         | 140 (73; 208)     | 1549461 (0.21) |                                                    |
|              | 1          | 8717                                                 | 1 %               | 2175 (1936; 2431)       | 302 (211; 419)              | 75 (52; 106)           | 61 (32; 90)       | 1488837 (0.22) |                                                    |
|              | 1.5        | 4384                                                 | 1 %               | 1094 (974; 1223)        | 152 (106; 210)              | 38 (26; 53)            | 31 (16; 45)       | 1419776 (0.23) |                                                    |
|              | 2          | 1337                                                 | 0 %               | 334 (297; 373)          | 46 (32; 64)                 | 12 (8; 16)             | 9 (5; 14)         | 1368758 (0.24) |                                                    |
| 80%          | 0.5        | 32035                                                | 5 %               | 7993 (7114; 8935)       | 1111 (775; 1538)            | 277 (190; 389)         | 223 (117; 332)    | 1793779 (0.18) |                                                    |
|              | 1          | 18150                                                | 3 %               | 4529 (4031; 5062)       | 629 (439; 871)              | 157 (108; 220)         | 127 (66; 188)     | 1728616 (0.19) |                                                    |
|              | 1.5        | 12830                                                | 2 %               | 3201 (2849; 3578)       | 445 (310; 616)              | 111 (76; 156)          | 89 (47; 133)      | 1647856 (0.2)  |                                                    |
|              | 2          | 9113                                                 | 1 %               | 2274 (2024; 2542)       | 316 (220; 438)              | 79 (54; 111)           | 64 (33; 95)       | 1587801 (0.21) |                                                    |
| 90%          | 4          | 7466                                                 | 1 %               | 1863 (1658; 2082)       | 259 (181; 358)              | 65 (44; 91)            | 52 (27; 77)       | 1486598 (0.22) |                                                    |
|              | 0.5        | 40148                                                | 6 %               | 10017 (8916; 11198)     | 1392 (971; 1928)            | 347 (238; 487)         | 280 (147; 417)    | 1948905 (0.16) |                                                    |
|              | 1          | 24504                                                | 4 %               | 6114 (5442; 6834)       | 850 (593; 1176)             | 212 (145; 297)         | 171 (89; 254)     | 1882833 (0.17) |                                                    |
|              | 1.5        | 18532                                                | 3 %               | 4624 (4116; 5169)       | 642 (448; 890)              | 160 (110; 225)         | 129 (68; 192)     | 1795161 (0.18) |                                                    |
| *65%         | 2          | 14344                                                | 2 %               | 3579 (3186; 4001)       | 497 (347; 689)              | 124 (85; 174)          | 100 (52; 149)     | 1729739 (0.19) |                                                    |
|              | 4          | 12494                                                | 2 %               | 3117 (2775; 3485)       | 433 (302; 600)              | 108 (74; 152)          | 87 (46; 130)      | 1617595 (0.2)  |                                                    |
|              |            | 656378                                               |                   | 163770 (145772; 183073) | 22756 (15872; 31513)        | 5673 (3897; 7965)      | 4576 (2397; 6811) | 1284694 (0.26) |                                                    |

\* This is the baseline intervention; values are reported in absolute terms, and not in terms of avoided cases.

**Table S93: Very severe pandemic influenza with R<sub>0</sub>=1.8: number of avoided cases, GP-visits, hospitalizations, and deaths associated with each sick leave intervention, assuming 35% of children and 25% adults are symptomatic, and with extra mixing.**

| Intervention |            | Median (0.25; 0.75 percentiles) relative to baseline |                   |                         |                             |                        |                   | Mean workdays lost (proportion lost to caregiving) |
|--------------|------------|------------------------------------------------------|-------------------|-------------------------|-----------------------------|------------------------|-------------------|----------------------------------------------------|
| % on leave   | Delay time | Symptomatic cases avoided                            | % Reduction in AR | GP-visits avoided       | Hospital admissions avoided | ICU admissions avoided | Avoided Deaths    |                                                    |
| 65%          | 0.5        | 16883                                                | 2 %               | 4212 (3749; 4709)       | 585 (408; 811)              | 146 (100; 205)         | 118 (62; 175)     | 1886843 (0.2)                                      |
|              | 1          | 7331                                                 | 1 %               | 1829 (1628; 2045)       | 254 (177; 352)              | 63 (44; 89)            | 51 (27; 76)       | 1802052 (0.21)                                     |
|              | 1.5        | 3683                                                 | 0 %               | 919 (818; 1027)         | 128 (89; 177)               | 32 (22; 45)            | 26 (13; 38)       | 1714021 (0.22)                                     |
|              | 2          | 1131                                                 | 0 %               | 282 (251; 315)          | 39 (27; 54)                 | 10 (7; 14)             | 8 (4; 12)         | 1649384 (0.23)                                     |
| 80%          | 0.5        | 27246                                                | 3 %               | 6798 (6051; 7599)       | 945 (659; 1308)             | 235 (162; 331)         | 190 (99; 283)     | 2200444 (0.17)                                     |
|              | 1          | 15426                                                | 2 %               | 3849 (3426; 4303)       | 535 (373; 741)              | 133 (92; 187)          | 108 (56; 160)     | 2104735 (0.18)                                     |
|              | 1.5        | 10926                                                | 1 %               | 2726 (2426; 3047)       | 379 (264; 525)              | 94 (65; 133)           | 76 (40; 113)      | 2000212 (0.19)                                     |
|              | 2          | 7776                                                 | 1 %               | 1940 (1727; 2169)       | 270 (188; 373)              | 67 (46; 94)            | 54 (28; 81)       | 1923157 (0.2)                                      |
| 90%          | 0.5        | 34289                                                | 4 %               | 8555 (7615; 9564)       | 1189 (829; 1646)            | 296 (204; 416)         | 239 (125; 356)    | 2402394 (0.16)                                     |
|              | 1          | 20909                                                | 3 %               | 5217 (4644; 5832)       | 725 (506; 1004)             | 181 (124; 254)         | 146 (76; 217)     | 2301401 (0.17)                                     |
|              | 1.5        | 15831                                                | 2 %               | 3950 (3516; 4415)       | 549 (383; 760)              | 137 (94; 192)          | 110 (58; 164)     | 2186738 (0.17)                                     |
|              | 2          | 12265                                                | 2 %               | 3060 (2724; 3421)       | 425 (297; 589)              | 106 (73; 149)          | 86 (45; 127)      | 2101975 (0.18)                                     |
| *65%         | 4          | 10691                                                | 1 %               | 2667 (2374; 2982)       | 371 (259; 513)              | 92 (63; 130)           | 75 (39; 111)      | 1962799 (0.19)                                     |
|              | 4          | 789919                                               |                   | 197089 (175429; 220319) | 27386 (19101; 37924)        | 6828 (4690; 9586)      | 5507 (2884; 8197) | 1546122 (0.25)                                     |

\* This is the baseline intervention; values are reported in absolute terms, and not in terms of avoided cases.

B.



ii. Costs and effects (R\_0 = 1.4, 1.6, 1.8)

Table S94: Very severe pandemic influenza with R\_0=1.4: costs and benefits associated with each sick leave intervention relative to the baseline, assuming 35% of children and 25% of adults are symptomatic, and with extra mixing.

| Intervention |           | Mean costs (1000 USD) |                  |                   |                          |                          | Mean benefits |             |            | Output measures  |                                    |      |
|--------------|-----------|-----------------------|------------------|-------------------|--------------------------|--------------------------|---------------|-------------|------------|------------------|------------------------------------|------|
| % on leave   | Max. days | Productivity losses   | Cost of campaign | GP-visits avoided | Hospitalisations avoided | Medication costs avoided | Total costs   | QALYs saved | YPLL saved | Mean NHB (QALYs) | Median NHB (0.25; 0.75 percentile) | Rank |
| 65 %         | 0.5       | 46744                 | 3226             | 404               | 10174                    | 277                      | 39115         | 671         | 449        | 272              | 188 (60; 370)                      | 3    |
|              | 1         | 44085                 | 2409             | 176               | 4440                     | 121                      | 41758         | 293         | 196        | -133             | -169 (-226; -91)                   | 12   |
|              | 1.5       | 30853                 | 1756             | 89                | 2236                     | 61                       | 30224         | 147         | 99         | -161             | -179 (-208; -139)                  | 13   |
|              | 2         | 20798                 | 1234             | 27                | 683                      | 19                       | 21304         | 45          | 30         | -172             | -177 (-187; -165)                  | 14   |
| 80 %         | 0.5       | 63935                 | 5277             | 637               | 16040                    | 436                      | 52099         | 1067        | 706        | 535              | 394 (199; 684)                     | 2    |
|              | 1         | 65231                 | 4456             | 361               | 9083                     | 247                      | 59997         | 603         | 399        | -9               | -88 (-201; 76)                     | 7    |
|              | 1.5       | 52206                 | 3799             | 255               | 6411                     | 174                      | 49165         | 425         | 281        | -76              | -132 (-212; -14)                   | 10   |
|              | 2         | 42125                 | 3274             | 180               | 4534                     | 123                      | 40562         | 300         | 198        | -113             | -152 (-211; -68)                   | 11   |
|              | 4         | 19667                 | 2033             | 147               | 3700                     | 101                      | 17753         | 242         | 161        | 61               | 33 (-19; 102)                      | 6    |
| 90 %         | **0.5     | 73757                 | 6722             | 793               | 19962                    | 543                      | 59181         | 1327        | 878        | 723              | 549 (302; 910)                     | 1    |
|              | 1         | 78083                 | 5901             | 484               | 12194                    | 332                      | 70973         | 809         | 535        | 85               | -21 (-173; 202)                    | 5    |
|              | 1.5       | 65385                 | 5244             | 366               | 9211                     | 251                      | 60802         | 611         | 403        | -9               | -88 (-207; 80)                     | 8    |
|              | 2         | 55433                 | 4718             | 282               | 7111                     | 193                      | 52565         | 471         | 311        | -65              | -124 (-220; 7)                     | 9    |
|              | 4         | 31965                 | 3477             | 245               | 6179                     | 168                      | 28850         | 405         | 270        | 110              | 63 (-23; 178)                      | 4    |
| *65 %        | 4         | 354504                | 0                | 8091              | 202527                   | 5551                     | 570673        | 13662       | 9283       | 22090            | 20456 (17954; 24082)               |      |

\*Baseline intervention; values reported as absolute gains and losses.  
\*\*optimal intervention.

**Table S95: Very severe pandemic influenza with R<sub>0</sub>=1.6: costs and benefits associated with each sick leave intervention relative to the baseline, assuming 35% of children and 25% of adults are symptomatic, and with extra mixing.**

| Intervention |           | Mean costs (1000 USD) |                  |                   |                          |                          | Mean benefits |             |            | Output measures  |                                    |      |
|--------------|-----------|-----------------------|------------------|-------------------|--------------------------|--------------------------|---------------|-------------|------------|------------------|------------------------------------|------|
| % on leave   | Max. days | Productivity losses   | Cost of campaign | GP-visits avoided | Hospitalisations avoided | Medication costs avoided | Total costs   | QALYs saved | YPLL saved | Mean NHB (QALYs) | Median NHB (0.25; 0.75 percentile) | Rank |
| 65 %         | 0.5       | 85712                 | 3226             | 342               | 8610                     | 235                      | 79751         | 560         | 372        | -253             | -323 (-432; -170)                  | 4    |
|              | 1         | 70497                 | 2409             | 149               | 3745                     | 102                      | 68910         | 244         | 162        | -459             | -488 (-537; -421)                  | 9    |
|              | 1.5       | 47559                 | 1756             | 75                | 1884                     | 51                       | 47305         | 123         | 81         | -360             | -374 (-400; -340)                  | 7    |
|              | 2         | 30513                 | 1234             | 23                | 574                      | 16                       | 31134         | 37          | 25         | -280             | -284 (-293; -272)                  | 6    |
| 80 %         | 0.5       | 122782                | 5277             | 547               | 13765                    | 375                      | 113373        | 903         | 592        | -253             | -374 (-542; -125)                  | 5    |
|              | 1         | 109799                | 4456             | 310               | 7799                     | 212                      | 105934        | 511         | 335        | -569             | -637 (-735; -495)                  | 13   |
|              | 1.5       | 85758                 | 3799             | 219               | 5513                     | 150                      | 83675         | 361         | 236        | -492             | -539 (-612; -438)                  | 10   |
|              | 2         | 67726                 | 3274             | 156               | 3916                     | 107                      | 66822         | 256         | 167        | -425             | -456 (-512; -383)                  | 8    |
|              | **4       | 34265                 | 2033             | 127               | 3208                     | 87                       | 32875         | 207         | 137        | -128             | -150 (-200; -87)                   | 1    |
| 90 %         | 0.5       | 145793                | 6722             | 685               | 17251                    | 470                      | 134109        | 1132        | 741        | -236             | -387 (-602; -73)                   | 3    |
|              | 1         | 134768                | 5901             | 418               | 10529                    | 287                      | 129434        | 690         | 451        | -630             | -720 (-857; -527)                  | 14   |
|              | 1.5       | 110173                | 5244             | 316               | 7963                     | 217                      | 106921        | 521         | 341        | -569             | -634 (-743; -486)                  | 12   |
|              | 2         | 91649                 | 4718             | 245               | 6163                     | 168                      | 89791         | 403         | 263        | -513             | -559 (-652; -440)                  | 11   |
|              | 4         | 56328                 | 3477             | 213               | 5368                     | 146                      | 54078         | 347         | 229        | -205             | -242 (-325; -136)                  | 2    |
| *65 %        | 4         | 491502                | 0                | 11204             | 280455                   | 7700                     | 790861        | 18816       | 12732      | 30552            | 28274 (24826; 33299)               |      |

\*Baseline intervention; values reported as absolute gains and losses.

\*\*optimal intervention.

h

**Table S96: Very severe pandemic influenza with R\_0=1.8: costs and benefits associated with each sick leave intervention relative to the baseline, assuming 35% of children and 25% of adults are symptomatic, and with extra mixing.**

| Intervention |           | Mean costs (1000 USD) |                  |                   |                          |                          | Mean benefits |             |            | Output measures  |                                    |      |
|--------------|-----------|-----------------------|------------------|-------------------|--------------------------|--------------------------|---------------|-------------|------------|------------------|------------------------------------|------|
| % on leave   | Max. days | Productivity losses   | Cost of campaign | GP-visits avoided | Hospitalisations avoided | Medication costs avoided | Total costs   | QALYs saved | YPLL saved | Mean NHB (QALYs) | Median NHB (0.25; 0.75 percentile) | Rank |
| 65 %         | 0.5       | 115814                | 3226             | 288               | 7254                     | 198                      | 111300        | 468         | 308        | -667             | -725 (-819; -597)                  | 6    |
|              | 1         | 90627                 | 2409             | 125               | 3150                     | 86                       | 89675         | 203         | 134        | -712             | -735 (-778; -678)                  | 7    |
|              | 1.5       | 60216                 | 1756             | 63                | 1582                     | 43                       | 60284         | 102         | 67         | -513             | -524 (-547; -494)                  | 4    |
|              | 2         | 37812                 | 1234             | 19                | 486                      | 13                       | 38528         | 31          | 21         | -362             | -364 (-374; -353)                  | 2    |
| 80 %         | 0.5       | 168765                | 5277             | 465               | 11707                    | 319                      | 161551        | 761         | 495        | -887             | -989 (-1134; -777)                 | 10   |
|              | 1         | 144205                | 4456             | 263               | 6628                     | 181                      | 141589        | 430         | 279        | -1014            | -1070 (-1156; -950)                | 11   |
|              | 1.5       | 111578                | 3799             | 187               | 4695                     | 128                      | 110369        | 304         | 198        | -821             | -859 (-924; -771)                  | 8    |
|              | 2         | 87416                 | 3274             | 133               | 3341                     | 91                       | 87125         | 216         | 140        | -672             | -695 (-749; -630)                  | 5    |
|              | **4       | 45630                 | 2033             | 109               | 2745                     | 75                       | 44733         | 176         | 115        | -281             | -297 (-347; -238)                  | 1    |
| 90 %         | 0.5       | 202449                | 6722             | 585               | 14733                    | 402                      | 193451        | 957         | 622        | -1016            | -1143 (-1331; -874)                | 13   |
|              | 1         | 178772                | 5901             | 357               | 8984                     | 245                      | 175087        | 583         | 378        | -1203            | -1275 (-1399; -1108)               | 14   |
|              | 1.5       | 144859                | 5244             | 270               | 6802                     | 185                      | 142845        | 441         | 286        | -1016            | -1066 (-1170; -934)                | 12   |
|              | 2         | 119657                | 4718             | 209               | 5270                     | 144                      | 118752        | 341         | 221        | -870             | -905 (-995; -797)                  | 9    |
|              | 4         | 75347                 | 3477             | 182               | 4593                     | 125                      | 73923         | 294         | 192        | -460             | -487 (-571; -388)                  | 3    |
| *65 %        | 4         | 591419                | 0                | 13483             | 337514                   | 9281                     | 951697        | 22541       | 15201      | 36711            | 33955 (29827; 40001)               |      |

\*Baseline intervention; values reported as absolute gains and losses.

\*\*optimal intervention.

1  
2  
3  
4  
5  
6  
7  
8  
9  
10  
11  
12  
13  
14  
15  
16  
17  
18  
19  
20  
21  
22  
23  
24  
25  
26  
27  
28  
29  
30  
31  
32  
33  
34  
35  
36  
37  
38  
39  
40  
41  
42  
43  
44  
45  
46  
47  
48  
49  
50  
51  
52  
53  
54  
55  
56  
57  
58  
59  
60

# Evaluating costs and health consequences of sick leave strategies against pandemic and seasonal influenza in Norway using a dynamic model

Christina Hansen Edwards<sup>1</sup>, Gianpaolo Scalia Tompaa<sup>2</sup>, Arve Sønbo Kristiansen<sup>3</sup>, Richard White<sup>4</sup>, Birgitte Freiesleben de Blasio<sup>5</sup>

<sup>1</sup>Department of Health and Inequality, Norwegian Institute of Public Health, P.O. Box 0403. 4403 Nydalen, Oslo, Norway.

<sup>2</sup>Department of Mathematics, University of Rome Tor Vergata, Via della Ricerca Scientifica 00133 Roma, Italy.

<sup>3</sup>Department of Health Management and Health Economics, Institute for Health and Society, University of Oslo. P.O.Box 1130. 0318 Blindern, Oslo, Norway.

<sup>4</sup>Department of Infectious Disease Epidemiology and Modelling, Norwegian Institute of Public Health, P.O. Box 0403. 4403 Nydalen, Oslo, Norway.

<sup>5</sup>Oslo Centre for Biostatistics and Epidemiology. Department of Biostatistics. Institute of Basic Medical Sciences. University of Oslo. P.O.Box 1122. 0317 Blindern, Oslo, Norway.

Correspondence to: CH Edwards [Christina.Hansen.Edwards@fhi.no](mailto:Christina.Hansen.Edwards@fhi.no)

SUPPLEMENTARY FILE 3: FIGURES

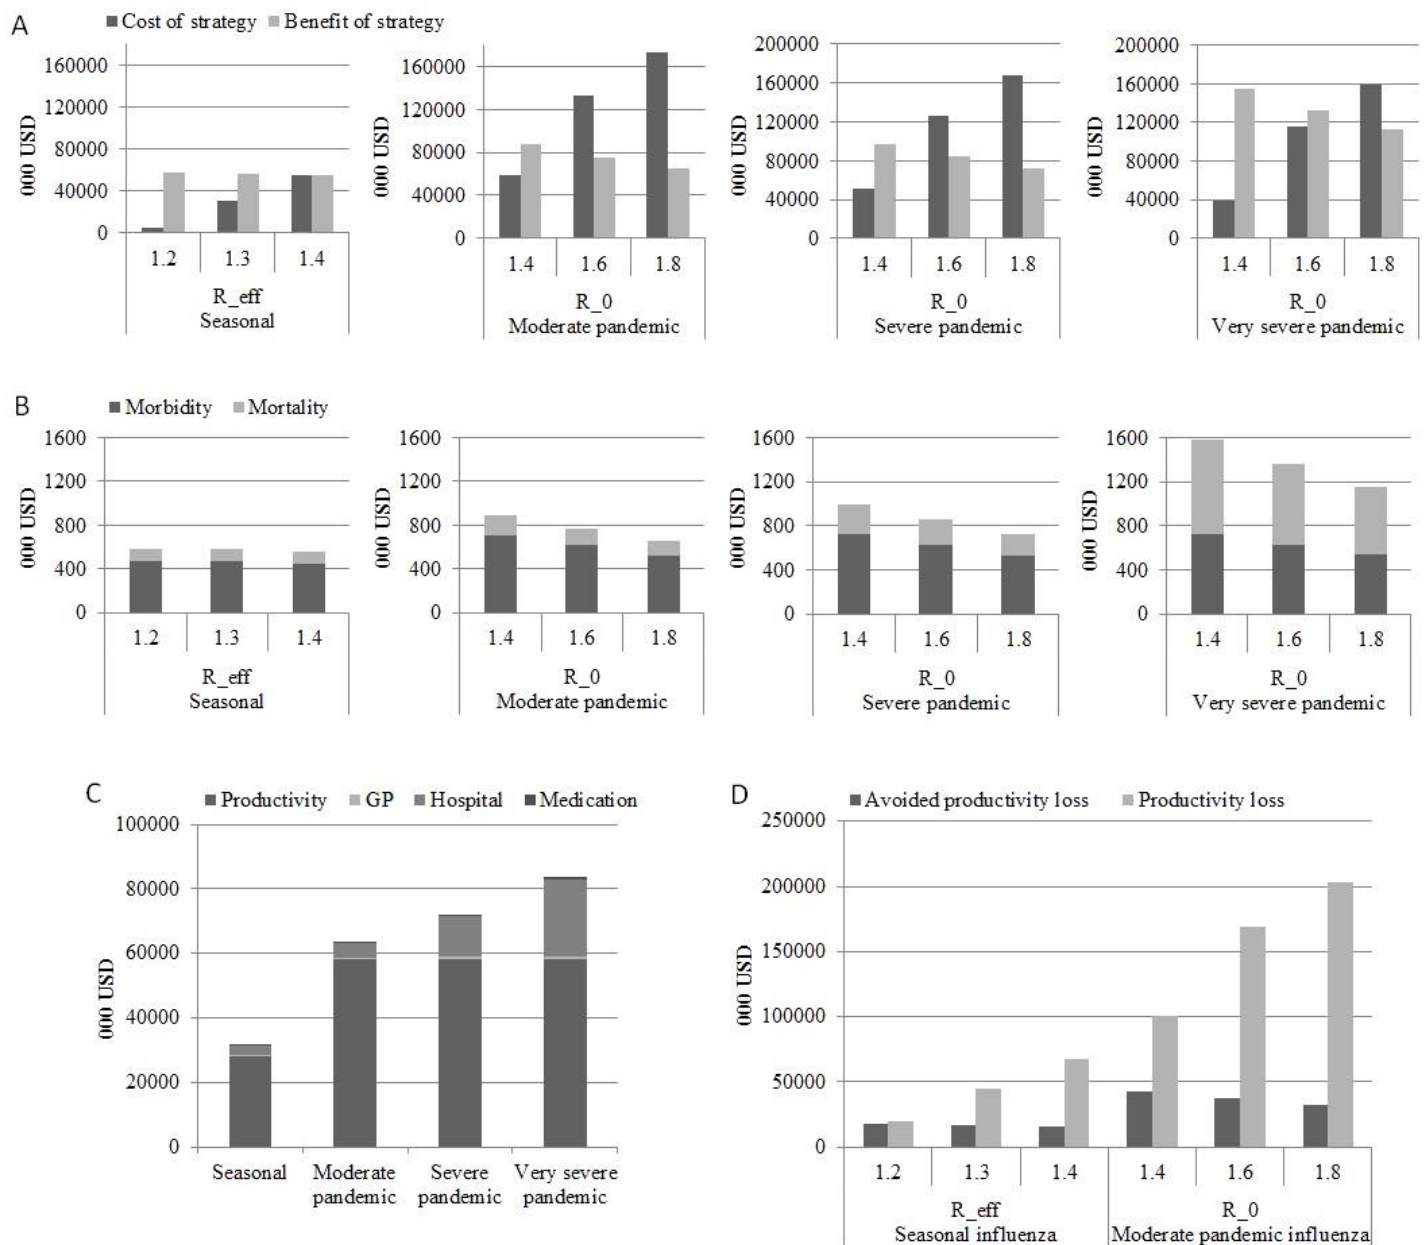

Figure S1: The effect transmissibility and pandemic severity on economic parameters for the intervention involving 90% of sick persons taking sick leave within 0.5 days of onset, extra mixing assumed. A) Total monetary costs and benefits of the intervention under seasonal and pandemic scenarios. B) Benefits from avoided morbidity and mortality under seasonal and pandemic scenarios. C) Proportion of productivity losses avoided due to avoided hospitalizations, GP-visits, medication use under seasonal and pandemic influenza. D) Baseline productivity losses and productivity losses avoided due to the sick leave intervention under seasonal and moderate pandemic influenza (the same pattern follows for more severe pandemic influenza scenarios).

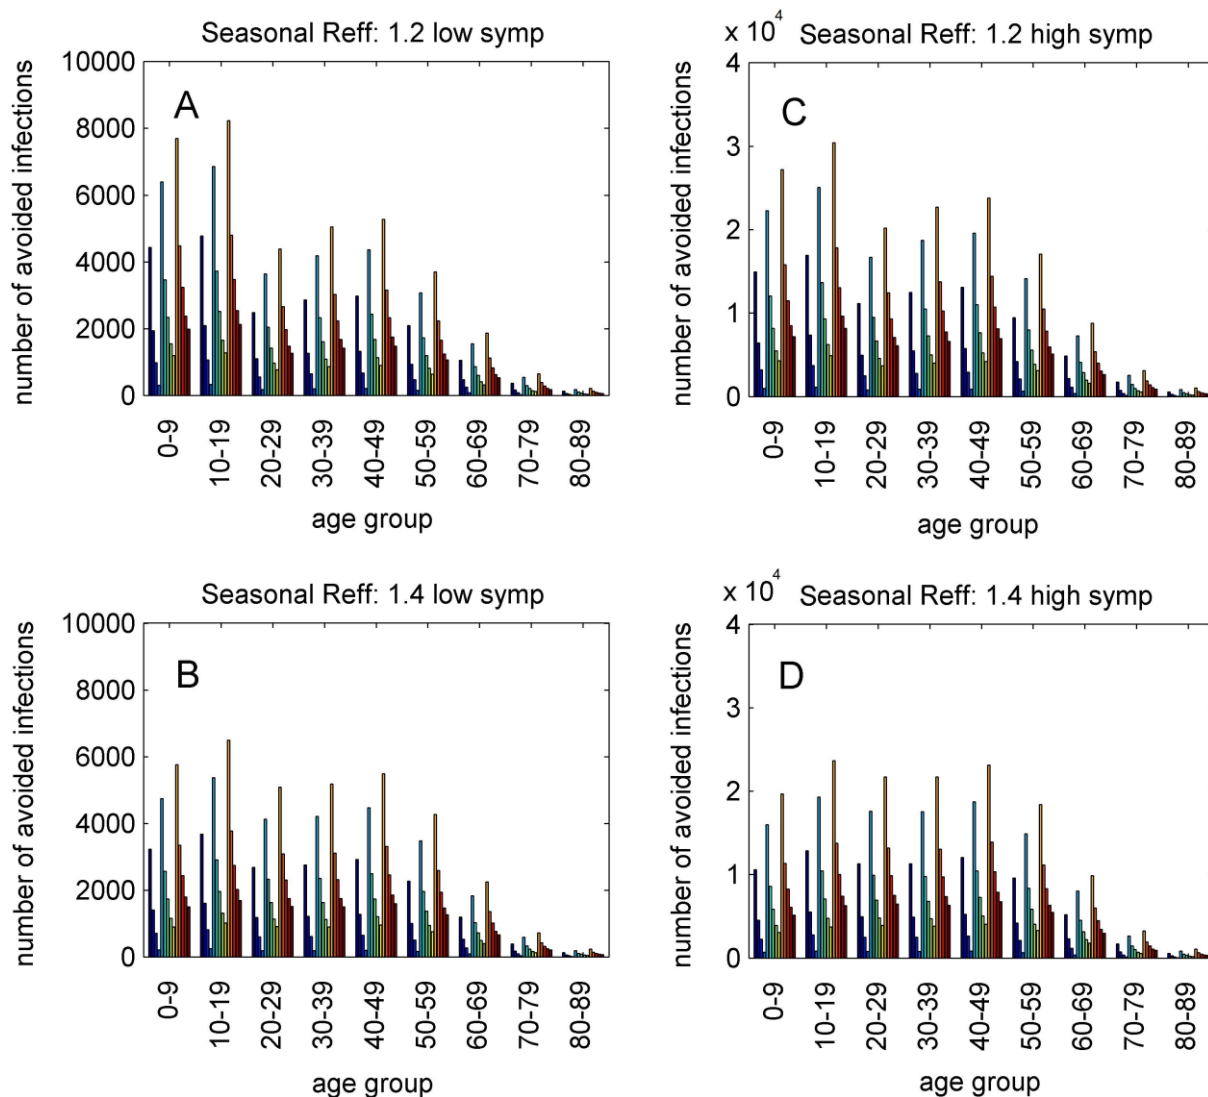

Figure S2: Absolute number of avoided clinical cases for selected seasonal scenarios, grouped according to median age, for all 14 interventions.  
 Interventions 1-4: Shades of blue: (65%; 0.5, 1, 1.5, and 2 days)  
 Interventions 5-9: Shades of green to yellow: (80%; 0.5, 1, 1.5, 2, and 4 days)  
 Interventions 10-14: Shades of orange to red: (90%; 0.5, 1, 1.5, 2, and 4 days)

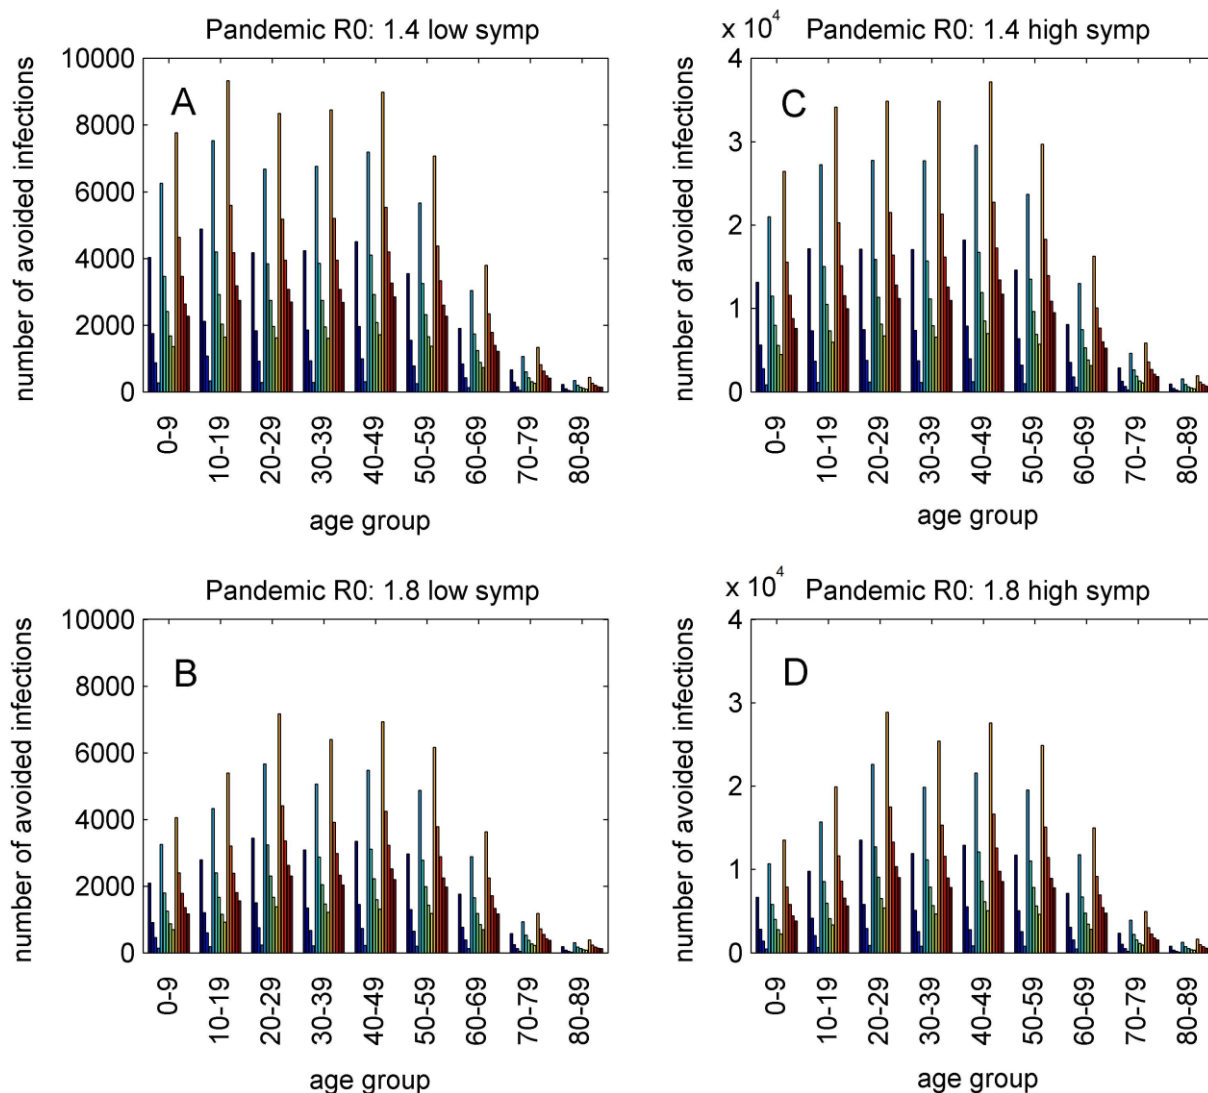

Figure S3: Absolute number of avoided clinical cases for selected pandemic scenarios, grouped according to median age, for all 14 interventions.

Interventions 1-4: Shades of blue: (65%; 0.5, 1, 1.5, and 2 days)

Interventions 5-9: Shades of green to yellow: (80%; 0.5, 1, 1.5, 2, and 4 days)

Interventions 10-14: Shades of orange to red: (90%; 0.5, 1, 1.5, 2, and 4 days)

Figure S4  
Acceptability curve  
without extra  
mixing.

A) Seasonal influenza ( $R_{eff}=1.3$ ), low symptomatic proportion (35% children and 25% adults symptomatic without extra mixing, B) Seasonal influenza ( $R_{eff}=1.3$ ), high symptomatic proportion (65% children and 55% adults symptomatic without extra mixing, C) Pandemic influenza ( $R_0=1.6$ ), low symptomatic proportion (35% children and 25% adults symptomatic without extra mixing, D) Pandemic influenza ( $R_0=1.6$ ), high symptomatic proportion (65% children and 55% adults symptomatic without extra mixing.

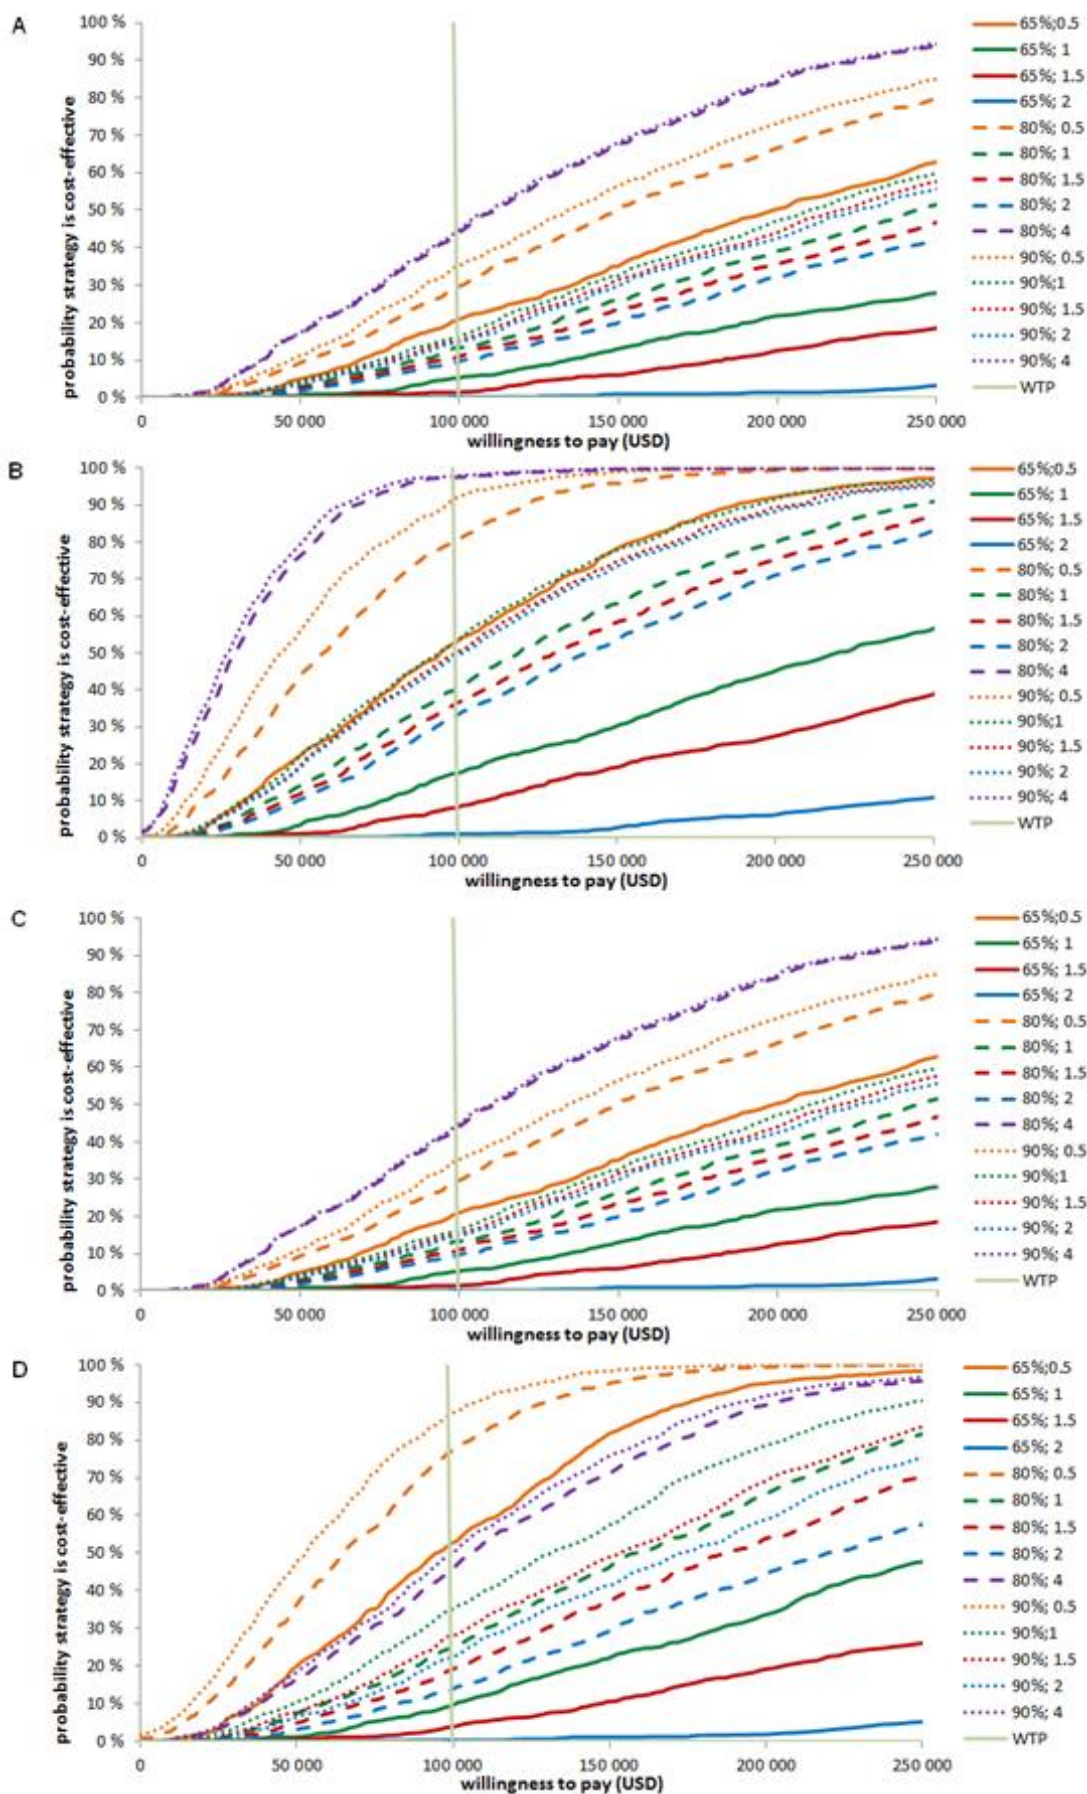



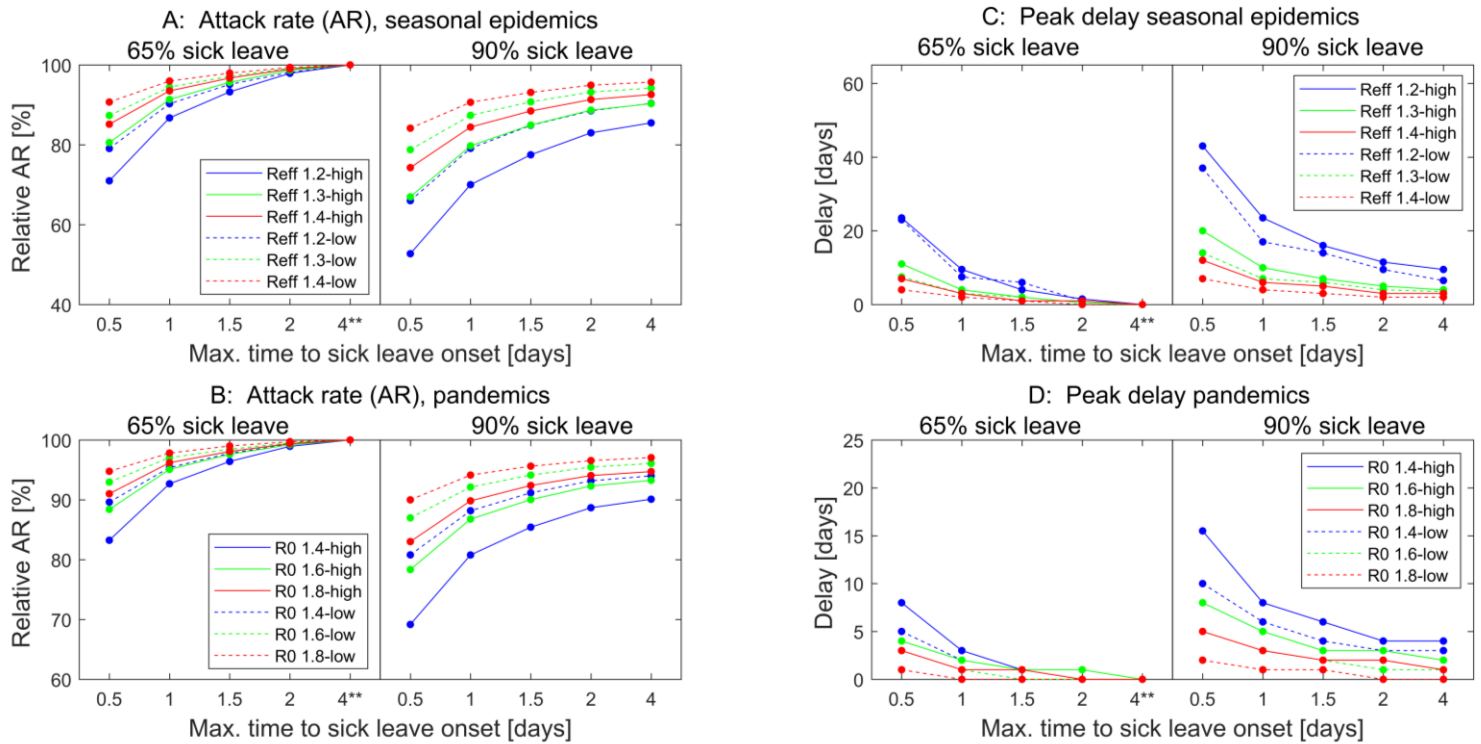

Figure S5 *Impact of workplace-based interventions on clinical attack rate and timing of peak for seasonal epidemics (panels A and C) and for pandemics (panels B and D) with extra mixing* in the households and the general population. Scenarios assuming low symptomatic proportions (35% children, 25% adults develop symptoms) are depicted with stippled lines; scenarios assuming high symptomatic proportions (65% children, 55% adults develop symptoms) are depicted with solid lines. Each level of transmissibility has a unique colour (blue = lowest transmissibility, green = medium transmissibility, and red = highest transmissibility). The figure shows sick leave interventions with 65% and 90% adherence combined with absence onset within 0.5, 1, 1.5, 2, and 4 days. The baseline intervention (65% adherence and sick leave onset within 4 days of symptom onset) is indicated by \*\*.

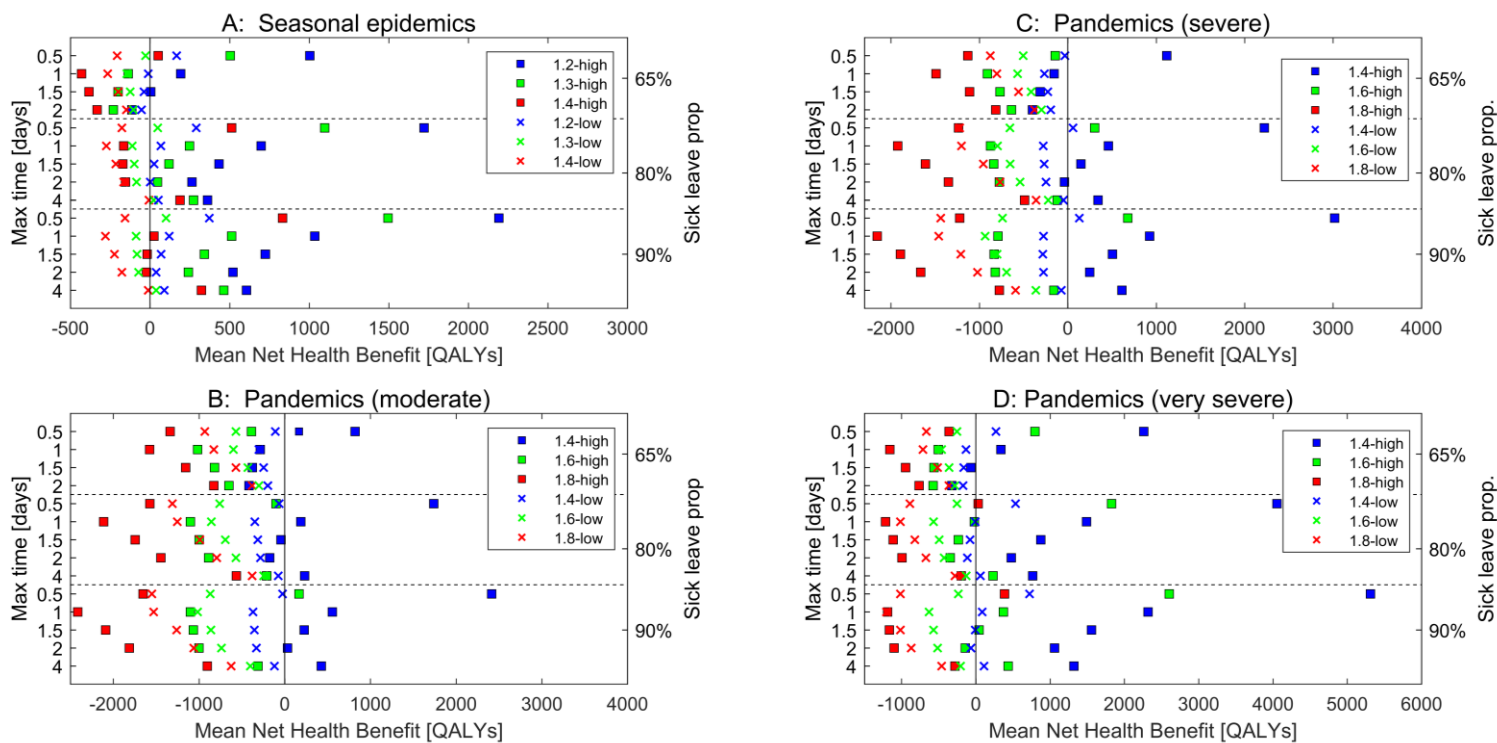

**Figure S6: Mean Net Health Benefit (NHB) of workplace-based interventions for all scenarios assuming extra mixing in households and the general population; seasonal epidemics (A), moderate pandemics (B), severe pandemics (C), very severe pandemics (D).**

Scenarios assuming low symptomatic proportions (35% children, 25% adults develop symptoms) are depicted as crosses, and scenarios assuming high symptomatic proportions (65% children, 55% adults develop symptoms) are depicted as squares. Each level of transmissibility has a unique colour (blue = lowest transmissibility, green = medium transmissibility, and red = highest transmissibility)

Figure S7:  
Acceptability curves  
with mixing.

A) Seasonal influenza ( $R_{eff}=1.3$ ), low symptomatic proportion (35% children and 25% adult symptomatic), without extra mixing, B) Seasonal influenza ( $R_{eff}=1.3$ ), high symptomatic proportion (65% children and 55% adult symptomatic) without extra mixing, C) Pandemic influenza ( $R_0=1.6$ ), low symptomatic proportion (35% children and 25% adult symptomatic), without extra mixing, D) Pandemic influenza ( $R_0=1.6$ ), high symptomatic proportion (65% children and 55% adult symptomatic) without extra mixing.

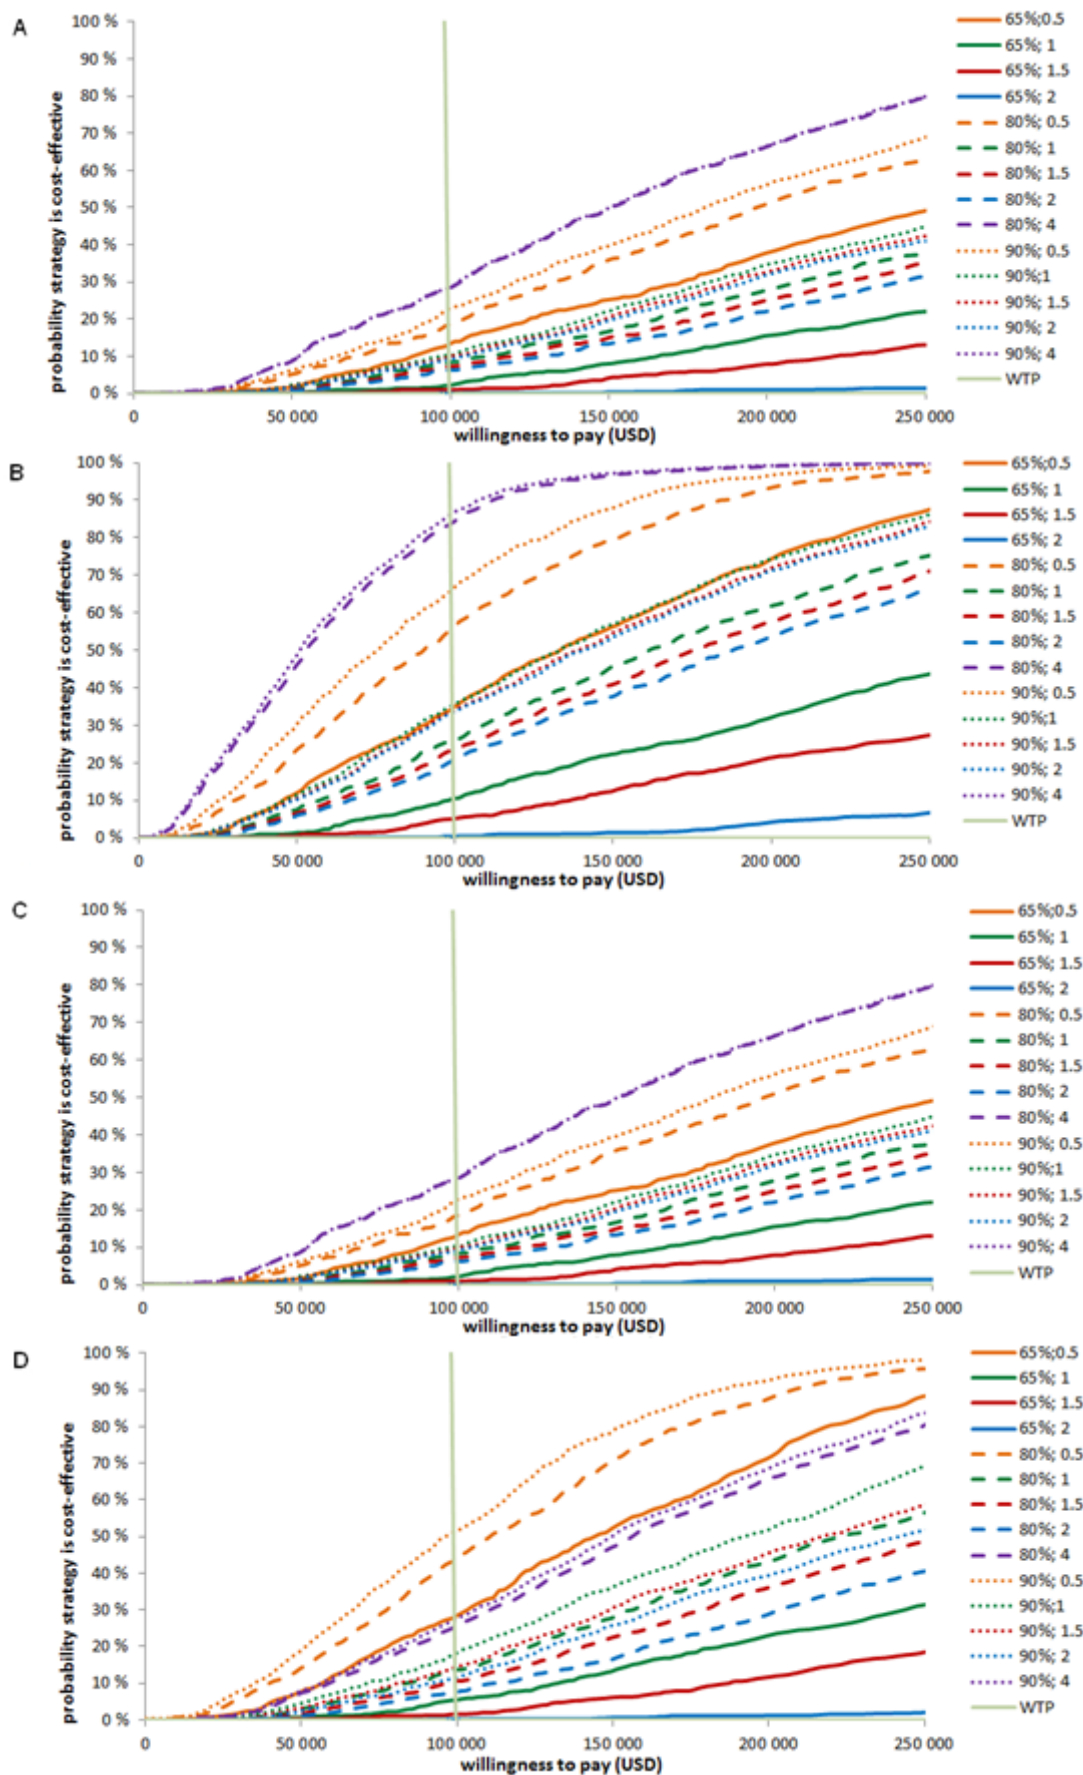

1  
2  
3  
4  
5  
6  
7  
8  
9  
10  
11  
12  
13  
14  
15  
16  
17  
18  
19  
20  
21  
22  
23  
24  
25  
26  
27  
28  
29  
30  
31  
32  
33  
34  
35  
36  
37  
38  
39  
40  
41  
42  
43  
44  
45  
46  
47  
48  
49  
50  
51  
52  
53  
54  
55  
56  
57  
58  
59  
60

For peer review only

CHEERS checklist—Items to include when reporting economic evaluations of health interventions

| Section/item                    | Item No | Recommendation                                                                                                                                                                             | Reported on page No/ line No   |
|---------------------------------|---------|--------------------------------------------------------------------------------------------------------------------------------------------------------------------------------------------|--------------------------------|
| <b>Title and abstract</b>       |         |                                                                                                                                                                                            |                                |
| Title                           | 1       | Identify the study as an economic evaluation or use more specific terms such as “cost-effectiveness analysis”, and describe the interventions compared.                                    | 1                              |
| Abstract                        | 2       | Provide a structured summary of objectives, perspective, setting, methods (including study design and inputs), results (including base case and uncertainty analyses), and conclusions.    | 2 & 3                          |
| <b>Introduction</b>             |         |                                                                                                                                                                                            |                                |
| Background and objectives       | 3       | Provide an explicit statement of the broader context for the study.                                                                                                                        | 5 & 6                          |
|                                 |         | Present the study question and its relevance for health policy or practice decisions.                                                                                                      | 5 & 6                          |
| <b>Methods</b>                  |         |                                                                                                                                                                                            |                                |
| Target population and subgroups | 4       | Describe characteristics of the base case population and subgroups analysed, including why they were chosen.                                                                               | 7 & 8                          |
| Setting and location            | 5       | State relevant aspects of the system(s) in which the decision(s) need(s) to be made.                                                                                                       | 6, 7, 8 & Supplementary file 1 |
| Study perspective               | 6       | Describe the perspective of the study and relate this to the costs being evaluated.                                                                                                        | 10                             |
| Comparators                     | 7       | Describe the interventions or strategies being compared and state why they were chosen.                                                                                                    | 6, 8 & 9                       |
| Time horizon                    | 8       | State the time horizon(s) over which costs and consequences are being evaluated and say why appropriate.                                                                                   | 7,8 & 9                        |
| Discount rate                   | 9       | Report the choice of discount rate(s) used for costs and outcomes and say why appropriate.                                                                                                 | Supplementary file 1           |
| Choice of health outcomes       | 10      | Describe what outcomes were used as the measure(s) of benefit in the evaluation and their relevance for the type of analysis performed.                                                    | 10 & Supplementary file 1      |
| Measurement of effectiveness    | 11a     | <i>Single study-based estimates:</i> Describe fully the design features of the single effectiveness study and why the single study was a sufficient source of clinical effectiveness data. | 9, 10 & Supplementary file 1   |

|                                                        |     |                                                                                                                                                                                                                                                                                                                                                       |                              |
|--------------------------------------------------------|-----|-------------------------------------------------------------------------------------------------------------------------------------------------------------------------------------------------------------------------------------------------------------------------------------------------------------------------------------------------------|------------------------------|
|                                                        | 11b | <i>Synthesis-based estimates:</i> Describe fully the methods used for identification of included studies and synthesis of clinical effectiveness data.                                                                                                                                                                                                | 9, 10 & Supplementary file 1 |
| Measurement and valuation of preference based outcomes | 12  | If applicable, describe the population and methods used to elicit preferences for outcomes.                                                                                                                                                                                                                                                           | NA                           |
| Estimating resources and costs                         | 13a | <i>Single study-based economic evaluation:</i> Describe approaches used to estimate resource use associated with the alternative interventions. Describe primary or secondary research methods for valuing each resource item in terms of its unit cost. Describe any adjustments made to approximate to opportunity costs.                           | NA                           |
|                                                        | 13b | <i>Model-based economic evaluation:</i> Describe approaches and data sources used to estimate resource use associated with model health states. Describe primary or secondary research methods for valuing each resource item in terms of its unit cost. Describe any adjustments made to approximate to opportunity costs.                           | 9,10, & Supplementary file 1 |
| Currency, price date, and conversion                   | 14  | Report the dates of the estimated resource quantities and unit costs. Describe methods for adjusting estimated unit costs to the year of reported costs if necessary. Describe methods for converting costs into a common currency base and the exchange rate.                                                                                        | 10 & Supplementary file 1    |
| Choice of model                                        | 15  | Describe and give reasons for the specific type of decision-analytical model used. Providing a figure to show model structure is strongly recommended.                                                                                                                                                                                                | 9, 10 & Supplementary file 1 |
| Assumptions                                            | 16  | Describe all structural or other assumptions underpinning the decision-analytical model.                                                                                                                                                                                                                                                              | 7-10 & Supplementary file 1  |
| Analytical methods                                     | 17  | Describe all analytical methods supporting the evaluation. This could include methods for dealing with skewed, missing, or censored data; extrapolation methods; methods for pooling data; approaches to validate or make adjustments (such as half cycle corrections) to a model; and methods for handling population heterogeneity and uncertainty. | 7-10 & Supplementary file 1  |

| <b>Results</b>                                                       |     |                                                                                                                                                                                                                                                                             |                                                            |
|----------------------------------------------------------------------|-----|-----------------------------------------------------------------------------------------------------------------------------------------------------------------------------------------------------------------------------------------------------------------------------|------------------------------------------------------------|
| Study parameters                                                     | 18  | Report the values, ranges, references, and, if used, probability distributions for all parameters. Report reasons or sources for distributions used to represent uncertainty where appropriate. Providing a table to show the input values is strongly recommended.         | Supplementary file 1                                       |
| Incremental costs and outcomes                                       | 19  | For each intervention, report mean values for the main categories of estimated costs and outcomes of interest, as well as mean differences between the comparator groups. If applicable, report incremental cost-effectiveness ratios.                                      | 11-15, Fig. 3 & Supplementary file 2                       |
| Characterising uncertainty                                           | 20a | <i>Single study-based economic evaluation:</i> Describe the effects of sampling uncertainty for the estimated incremental cost and incremental effectiveness parameters, together with the impact of methodological assumptions (such as discount rate, study perspective). | NA                                                         |
|                                                                      | 20b | <i>Model-based economic evaluation:</i> Describe the effects on the results of uncertainty for all input parameters, and uncertainty related to the structure of the model and assumptions.                                                                                 | 14-16, Fig. 4 & Supplementary file 2, Supplementary file 3 |
| Characterising heterogeneity                                         | 21  | If applicable, report differences in costs, outcomes, or cost-effectiveness that can be explained by variations between subgroups of patients with different baseline characteristics or other observed variability in effects that are not reducible by more information.  | 17-19                                                      |
| <b>Discussion</b>                                                    |     |                                                                                                                                                                                                                                                                             |                                                            |
| Study findings, limitations, generalisability, and current knowledge | 22  | Summarise key study findings and describe how they support the conclusions reached. Discuss limitations and the generalisability of the findings and how the findings fit with current knowledge.                                                                           | 16-20                                                      |
| <b>Other</b>                                                         |     |                                                                                                                                                                                                                                                                             |                                                            |
| Source of funding                                                    | 23  | Describe how the study was funded and the role of the funder in the identification, design, conduct, and reporting of the analysis. Describe other non-monetary sources of support.                                                                                         | 22                                                         |
| Conflicts of interest                                                | 24  | Describe any potential for conflict of interest of study contributors in accordance with journal policy. In the absence of a journal policy, we                                                                                                                             | 22                                                         |

|  |  |                                                                                                   |  |
|--|--|---------------------------------------------------------------------------------------------------|--|
|  |  | recommend authors comply with International Committee of Medical Journal Editors recommendations. |  |
|--|--|---------------------------------------------------------------------------------------------------|--|

For consistency, the CHEERS statement checklist format is based on the format of the CONSORT statement checklist

For peer review only



# BMJ Open

## Evaluating costs and health consequences of sick leave strategies against pandemic and seasonal influenza in Norway using a dynamic model

|                                 |                                                                                                                                                                                                                                                                                                                                            |
|---------------------------------|--------------------------------------------------------------------------------------------------------------------------------------------------------------------------------------------------------------------------------------------------------------------------------------------------------------------------------------------|
| Journal:                        | <i>BMJ Open</i>                                                                                                                                                                                                                                                                                                                            |
| Manuscript ID                   | bmjopen-2018-027832.R1                                                                                                                                                                                                                                                                                                                     |
| Article Type:                   | Research                                                                                                                                                                                                                                                                                                                                   |
| Date Submitted by the Author:   | 16-Jan-2019                                                                                                                                                                                                                                                                                                                                |
| Complete List of Authors:       | Hansen Edwards, Christina; Nasjonalt folkehelseinstitutt, Tomba, Gianpaolo; Universita degli Studi di Roma La Sapienza, Dept. of Mathematics<br>Sonbo Kristiansen, Ivar; University of Oslo, Health Management and Health Economics<br>White, Richard; Nasjonalt folkehelseinstitutt<br>de Blasio, Birgitte; Nasjonalt folkehelseinstitutt |
| <b>Primary Subject Heading</b>: | Public health                                                                                                                                                                                                                                                                                                                              |
| Secondary Subject Heading:      | Epidemiology, Health economics, Infectious diseases, Occupational and environmental medicine                                                                                                                                                                                                                                               |
| Keywords:                       | Human influenza, Infection control < INFECTIOUS DISEASES, Epidemiology < INFECTIOUS DISEASES, Public health < INFECTIOUS DISEASES, HEALTH ECONOMICS                                                                                                                                                                                        |
|                                 |                                                                                                                                                                                                                                                                                                                                            |

SCHOLARONE™  
Manuscripts

1  
2  
3  
4 **Evaluating costs and health consequences of sick leave strategies**  
5  
6  
7 **against pandemic and seasonal influenza in Norway using a**  
8  
9  
10 **dynamic model**  
11  
12

13  
14 Christina Hansen Edwards<sup>1</sup>, Gianpaolo Scalia Tomba<sup>2</sup>, Ivar Sønnebø Kristiansen<sup>3</sup>,

15  
16  
17 Richard White<sup>4</sup>, Birgitte Freiesleben de Blasio<sup>4,5</sup>  
18  
19

20  
21 <sup>1</sup>Department of Health and Inequality, Norwegian Institute of Public Health, P.O. Box  
22  
23  
24  
25 0403. 4403 Nydalen, Oslo, Norway.  
26  
27

28  
29 <sup>2</sup>Department of Mathematics, University of Rome Tor Vergata, Via Ricerca Scientifica  
30  
31  
32 00133 Roma, Italy.  
33  
34

35  
36 <sup>3</sup>Department of Health Management and Health Economics, Institute for Health and  
37  
38  
39 Society, University of Oslo. P.O.Box 1130. 0318 Blindern, Oslo, Norway.  
40  
41

42  
43  
44 <sup>4</sup>Department of Infectious Disease Epidemiology and Modelling, Norwegian Institute  
45  
46  
47 of Public Health, P.O. Box 0403. 4403 Nydalen, Oslo, Norway.  
48  
49

1  
2  
3  
4 <sup>5</sup>Oslo Centre for Biostatistics and Epidemiology. Department of Biostatistics. Institute  
5  
6  
7  
8 of Basic Medical Sciences. University of Oslo. P.O.Box 1122. 0317 Blindern, Oslo,  
9  
10  
11 Norway.

12  
13  
14  
15  
16  
17  
18  
19 **Correspondence to:** CH Edwards Christina.Hansen.Edwards@fhi.no  
20  
21  
22  
23  
24  
25  
26  
27

28 **Keywords:** Human Influenza; Infection Control; Epidemiology; Public Health; Health  
29  
30  
31 Economics  
32  
33  
34  
35  
36  
37  
38  
39  
40  
41  
42  
43  
44  
45  
46  
47  
48  
49  
50  
51  
52  
53  
54  
55  
56  
57  
58  
59  
60

**Word count:** 4287

## Abstract

**Objectives:** To quantify population level health and economic consequences of sick leave among workers with influenza symptoms.

**Interventions:** Compared with current sick leave practice (baseline) we evaluated the health and cost consequences of: I) increasing the proportion of workers on sick leave from 65% (baseline) to 80% or 90%; II) shortening the maximum duration from symptom onset to sick leave from 4 days (baseline) to 2 days, 1.5 days, 1 day, and 0.5 days; and III) combinations of I and II.

**Methods:** A dynamic compartmental influenza model was developed using Norwegian population data and survey data on employee sick leave practices. The sick leave interventions were simulated under 12 different seasonal epidemic and 36 different pandemic influenza scenarios. These scenarios varied in terms of transmissibility, the proportion of symptomatic cases, and illness severity (risk of primary care consultations, hospitalizations and deaths). Using probabilistic sensitivity analyses, a net health benefit approach was adopted to assess the cost-effectiveness of the interventions from a societal perspective.

**Results:** Compared with current sick leave practice, sick leave interventions were cost-effective for 31 (65%) of the pandemic scenarios, and 11 (92%) of the seasonal scenarios. Economic benefits from sick leave interventions were greatest for scenarios with low transmissibility, high symptomatic proportions, and high illness severity. Overall, the health and economic benefits were greatest for the intervention involving 90% of sick workers taking sick leave within one-half day of symptoms. Depending on the influenza scenario, this intervention resulted in a 44.4–99.7% reduction in the attack rate. Interventions involving sick

1  
2  
3  
4 leave onset beginning 2 days or later, after the onset of symptoms, resulted in economic  
5  
6 losses.

7  
8  
9 **Conclusions:** Prompt sick leave onset and a high proportion of sick leave among workers  
10  
11 with influenza symptoms may be cost-effective, particularly during influenza epidemics and  
12  
13 pandemics with low transmissibility or high morbidity.  
14  
15

## 16 17 18 **Article Summary**

### 19 20 21 **Strengths and limitations of this study**

- 22  
23 - Although national recommendations for flu management often advise sick leave from  
24  
25 work, no systematic studies of health and cost consequences of such recommendations  
26  
27 have been published, and no studies have evaluated the effects of sick leave  
28  
29 interventions in detail.  
30  
31
- 32  
33 - This study uses mathematical modelling to compare current sick leave practice with  
34  
35 14 alternative sick leave interventions, related to the proportion of ill employees taking  
36  
37 sick leave and the timeliness of sick leave relative to symptoms, to investigate the  
38  
39 epidemiological effects of these interventions and their economic consequences  
40  
41
- 42  
43 - Some of the parameters used in the modelling and evaluation are not influenza-  
44  
45 specific, such as the above current sick leave practice, but rather based on influenza-  
46  
47 like illness (ILI), being derived from interviews unaccompanied by test results.  
48  
49
- 50  
51 - All interventions were assessed for a variety of potential epidemic and pandemic  
52  
53 influenza scenarios with varying characteristics.  
54  
55
- 56  
57 - We have studied population-wide effects for the Norwegian setting and our findings  
58  
59 may not be directly transferrable to other settings or sub-groups.  
60

## Introduction

Seasonal influenza affects 5–15% of the world's population annually. Globally, influenza epidemics are responsible for 250,000–500,000 deaths and 3–5 million cases of severe illness per year.<sup>1</sup> During an influenza pandemic the disease burden may increase substantially. The disease also imposes a considerable cost burden on the healthcare system, but the greatest proportion of costs are indirect costs resulting from lost workdays.<sup>2</sup>

When influenza-infected workers report to work, their co-workers are at risk of becoming infected. We recently conducted a literature review on influenza transmission in the workplace and assessed sick leave recommendations during influenza in 18 European countries.<sup>3</sup> We found that while pandemic preparedness plans of many European countries officially advise sick workers to be absent from work, only one study was identified that had assessed the effectiveness of sick leave interventions during seasonal influenza.<sup>3</sup> This was a modelling study indicating that liberal sick leave policies and increased payment compensations during sick leave would reduce workplace transmission up to 39%.<sup>3 4</sup> Norway is a western-European society with generous social welfare programs, so few workers lose income as a result of sick leave due to influenza-like symptoms.<sup>5-7</sup> No studies to date have ascertained whether sick leave during influenza is a cost-effective way of reducing the spread of influenza. In addition, countries that advise workers with influenza to take sick leave recommend diverse sick leave strategies.<sup>3</sup>

Influenza transmission depends on a complex interaction between the host, pathogen and the environment. Characteristics, such as the attack rate and disease severity of a particular influenza season, may affect which sick leave strategies are most cost-effective to implement. The effectiveness of sick leave as a mitigation intervention is limited by

1  
2  
3  
4 asymptomatic transmission. The proportion of asymptomatic cases reported in the literature  
5  
6 varies between 25% and 75%,<sup>8-11</sup> and asymptomatic cases may shed reduced amounts of the  
7  
8 virus.<sup>12</sup> Moreover, in symptomatic individuals, virus shedding may begin 1–2 days prior to  
9  
10 the onset of symptoms.<sup>9 10</sup> During the symptomatic phase, workers can either choose to be  
11  
12 present at work while feeling ill (“presenteeism”) or to remain at home (“absenteeism”).  
13  
14  
15 Studies have suggested that workplace presenteeism during influenza infection is  
16  
17 widespread.<sup>13 14</sup> From a public health and socioeconomic perspective, incentivising sick leave  
18  
19 during influenza infection may reduce disease transmission enough to reduce the overall costs  
20  
21 to society<sup>15</sup>. From the perspective of an employer, however, the burden of work absenteeism  
22  
23 may be considerable, as the value of the work employees would have produced is lost.<sup>16 17</sup>  
24  
25  
26

27  
28 Using a model framework, we attempted to quantify the costs and health consequences  
29  
30 of increasing sick leave among workers with influenza symptoms. In our study we define sick  
31  
32 leave as the period of time a worker is absent from paid work due to influenza symptoms. We  
33  
34 simulated the effect of implementing different sick leave policies during an influenza  
35  
36 outbreak in the Norwegian population. We conducted a survey to inform the model with local  
37  
38 data on current influenza-related sick leave behaviour in Norway, and compared different sick  
39  
40 leave interventions with current practice.  
41  
42  
43  
44  
45  
46  
47  
48  
49  
50  
51  
52  
53  
54  
55  
56  
57  
58  
59  
60

## Material and methods

### Modelling assumptions

We developed a model to quantify the number of mild, moderate and severe influenza cases. A scenario-based approach was applied to account for the fact that influenza, particularly pandemic influenza, varies in terms of transmissibility, likelihood of symptomatic infections, and illness severity (i.e. risk of primary care visits, hospitalizations and death). We differentiated between interventions (variation in sick leave behaviour) and scenarios (variations in influenza characteristics), and studied each sick leave intervention given each distinct influenza scenario. In total, we analysed current sick leave practice (baseline), and 14 alternative sick leave interventions combined with 48 influenza scenarios. The health outcomes from the disease model were used in an economic model to estimate costs and quality adjusted life years (QALYs). Because the parameters of the economic model (listed in Table SMM1, Supplementary File 1) were uncertain, we used Monte Carlo simulations to explore the consequences of the uncertainty. In this paper, we outline the main characteristics of the models and their input parameters. A detailed description of the survey and models is provided in Supplementary file 1.

### Influenza-related sick leave

During epidemics, Norwegian health authorities advise that workers with symptoms of influenza remain at home until feeling well enough to work. During pandemics, sick leave is recommended until at least 24 hours following defervescence<sup>3 18</sup>. Lacking data on influenza-related absences, we conducted a web-based survey in a convenience sample of 490 Norwegian employees. In total, 46% (224/490) of the participants reported having experienced influenza-like symptoms during the previous influenza season. Based on expert



1  
2  
3  
4 opinion, influenza-like symptoms, for the purposes of the survey, included: fever, cough, sore  
5  
6 throat, headache, fatigue, muscle pain, and/or stuffy nose. Among participants reporting  
7  
8 influenza-like-symptoms, 74% had taken sick leave. The duration of absence varied from 1–  
9  
10 13 workdays (mean of 2.4 days) and individuals waited from 1–8 days (mean of 2.7 days)  
11  
12 after the onset of symptoms to take leave (Figure SMM1, Supplementary File 1). Among  
13  
14 those who took sick leave, 24% began on the first day that they experienced symptoms, 43%  
15  
16 on the second day, 19% on the third day, while 14% waited at least four days before taking  
17  
18 sick leave (Figure SMM2, Supplementary File 1).  
19  
20  
21

22  
23 The survey respondents were mostly public sector employees who have high job  
24  
25 security. There is evidence that workers with lower job security are more likely to attend work  
26  
27 despite feeling ill,<sup>19</sup> therefore we lowered the baseline sick leave rate in our model to 65% to  
28  
29 make the results more representative of the general working population in Norway.  
30  
31

32  
33 In the baseline sick leave setting, we assumed that symptomatic workers would stay at  
34  
35 home for an average of 3.5 calendar days for seasonal influenza, adjusting for a working week  
36  
37 of five days. For pandemic influenza, we increased this period to 6.5 calendar days, in line  
38  
39 with the Norwegian national guidelines during the 2009 H1N1 pandemic that suggested one  
40  
41 week of absence from the onset of symptoms. Consistent with the survey, we assumed that  
42  
43 among those workers who take sick leave because of influenza, 24%, 43%, 19%, and 14%  
44  
45 would initiate sick leave on the first, second, third, and fourth day relative to symptom onset,  
46  
47 respectively. We found no data in the literature on the proportion of children absent from  
48  
49 school or day-care due to influenza-like illness. Therefore, we assumed that 90% of children  
50  
51 with influenza would remain at home, with cumulative withdrawal rates of 33%, 67%, and  
52  
53 100% on the first, second, and third day relative to symptom onset, respectively.  
54  
55  
56  
57  
58  
59  
60

## Interventions

We considered all combinations of the following interventions aimed at increasing the proportion of workers taking sick leave and/or reducing the delay from symptom onset to withdrawal from the workplace: I) proportion of symptomatic workers taking sick leave: 65%, 80% and 90%, and II) maximum time from symptom onset to sick leave: 0.5 days, 1 day, 1.5 days, 2 days and 4 days. These interventions were chosen based on the results from our survey on sick-leave behaviour, and on perceived feasibility. Interventions were compared to the baseline sick leave practice, defined as 65% of ill workers taking sick leave after a maximum of four days with symptoms. In children, the baseline pattern of sick leave was kept constant.

We simulated interventions with less than 4 days of maximum delay from symptoms onset to sick leave using a truncated variant of the baseline daily withdrawal proportions. For example, in the case of a maximum of 2 days delay, 24% would initiate sick leave when symptoms first appeared, 43% on the following day, and the remaining 33% on the next day.

## Main features of the influenza model and the economic model

We developed an age-structured, deterministic simulation model (Fig 1) for the spread of influenza in Norway (population: 5.05 million in January 2013). The social mixing structure, representing mixing within households, schools, workplaces, and general society, was reconstructed from simulations based on real demographic data (Figure SMM3, Supplementary File 1). People at home with influenza illness were assumed to not mix with other people at work/school, or in the general population. We calibrated the model to a broad spectrum of seasonal and pandemic influenza scenarios: seasonal epidemics at an effective reproductive number ( $R_{\text{eff}}$ ) of 1.2, 1.3, and 1.4, assuming 35% of children and 25% of adults would develop symptoms (low symptomatic proportions), or that 65% of children and 55% of

1  
2  
3  
4 adults would develop symptoms (high symptomatic proportions). For pandemic influenza, we  
5  
6 constructed scenarios at a basic reproductive number ( $R_0$ ) of 1.4, 1.6, and 1.8, also assuming  
7  
8 low or high symptomatic proportions as described above. The reproductive number is defined  
9  
10 as the number of secondary cases that one influenza case would produce, and can be regarded  
11  
12 as a measure of transmissibility.  
13  
14

15  
16 We assumed that individuals become infectious prior to the onset of symptoms, and  
17  
18 that their infectivity would peak approximately on the first day of symptoms and would last  
19  
20 for seven days, according to a given infectivity profile (Figure SMM4, Supplementary File 1).  
21  
22 Individuals with asymptomatic infection were assumed to be half as infectious as those with  
23  
24 symptoms, but with a similar contour of infectivity.  
25  
26  
27

28  
29 We developed a probabilistic health economic model to translate the output from the  
30  
31 infection model into costs of healthcare, costs of sick leave (productivity losses), and the  
32  
33 intervention costs for each intervention. Productivity losses are highly relevant in sick leave  
34  
35 intervention studies, and therefore we assessed cost-effectiveness from a societal perspective.  
36  
37 To ease comparison between the interventions and scenarios, we used a net health benefit  
38  
39 (NHB) approach assuming that the value of a QALY ( $\lambda$ ) was NOK 570,807 (\$98,060 USD<sup>20</sup>)  
40  
41 in line with Norwegian guidelines.<sup>21</sup> By definition,  $NHB = QALY \text{ gains} - (\text{cost of intervention} /$   
42  
43  $\lambda)$ . This means that an intervention is cost-effective if NHB expressed as QALYs is greater  
44  
45 than zero. All costs were measured in 2012 Norwegian Kroner (NOK) (\$1.00 USD = NOK  
46  
47 5.82)<sup>20</sup>.  
48  
49  
50

51  
52 The age-specific incidence of symptomatic influenza from simulations of the dynamic  
53  
54 model was used as input data for the economic analyses. We used the estimates adopted in the  
55  
56 2014 Norwegian pandemic preparedness plan for the proportion of clinical cases that would  
57  
58  
59  
60

1  
2  
3  
4 require healthcare (visit to a GP, hospitalisation, or intensive care treatment), and used  
5  
6 estimates of mortality from the same source.<sup>22</sup> The plan includes three distinct  
7  
8 morbidity/mortality estimates for moderate, severe, and very severe pandemics. The  
9  
10 morbidity during seasonal influenza was assumed to be similar to that observed during a  
11  
12 moderate pandemic.  
13

14  
15 The dynamic influenza model was developed in Matlab version R2013a using the  
16  
17 ode45 solver. The economic model was developed in STATA-13 and Excel 2010.  
18  
19

### 20 21 **Patient and public involvement**

22 Public health officials were involved in the development of the study design and outcome  
23  
24 measures. Patients were not involved in study development, and study findings were not  
25  
26 disseminated to study participants, as these were anonymous.  
27  
28  
29

### 30 31 **Results**

32  
33 This section is organised as follows: First, we present the baseline disease burden and baseline  
34  
35 economic costs for each of the main scenarios. Second, we describe the health impacts of the  
36  
37 sick leave interventions. Third, we present the results of the cost-effectiveness analyses.  
38  
39 Lastly, we present results from the sensitivity analyses, in which we have assumed extra  
40  
41 mixing in the household and general population in individuals who are absent from work. We  
42  
43 present the epidemiological results by reporting relative changes in the clinical attack rate  
44  
45 (AR), which is defined as the proportion of the population that acquire a clinical infection.  
46  
47 The comparative changes in GP visits, hospitalisations, and mortalities closely mimicked  
48  
49 changes in the AR. We report the cost-effectiveness results in terms of mean NHB. Complete  
50  
51 tables for all results related to the epidemiologic outcomes, direct and indirect costs in the  
52  
53  
54  
55  
56  
57  
58  
59  
60

1  
2  
3  
4 economic model, including probabilistic variation, are available upon request from the  
5  
6 authors.  
7  
8

### 9 **Baseline scenarios**

10  
11 Table 1 shows the key epidemiologic and economic results for each of the baseline  
12  
13 scenarios for seasonal and pandemic influenza. In the absence of any intervention, the model  
14  
15 produced clinical attack rates (ARs) ranging from 3.2–16.9% for seasonal influenza at an  
16  
17  $R_{\text{eff}}$  of 1.2–1.4, and 9.4–34.8% for pandemic influenza at an  $R_0$  of 1.4–1.8. Visits to a GP  
18  
19 and hospitalisations ranged from 478–2,521 and 23–122 per 100,000 people for seasonal  
20  
21 epidemics, and from 1,398–8,688 and 67–1,207 per 100,000 for pandemics. The  
22  
23 corresponding mortality ranged from 5–26 expected deaths per 100,000 people for seasonal  
24  
25 influenza, and from 15–243 deaths for pandemic influenza.  
26  
27  
28  
29  
30  
31  
32  
33  
34  
35  
36  
37  
38  
39  
40  
41  
42  
43  
44  
45  
46  
47  
48  
49  
50  
51  
52  
53  
54  
55  
56  
57  
58  
59  
60

**Table 1: Key population baseline epidemiological and economic outcomes for seasonal epidemics and severe pandemics in each of the scenarios considered.**

| Baseline outcomes in the total population                  | Seasonal influenza<br>$R_{eff}^b$ |       |       | Pandemic influenza severe (moderate; very severe) <sup>a</sup><br>$R_0^c$ |                      |                      |
|------------------------------------------------------------|-----------------------------------|-------|-------|---------------------------------------------------------------------------|----------------------|----------------------|
|                                                            | 1.2                               | 1.3   | 1.4   | 1.4                                                                       | 1.6                  | 1.8                  |
| <b>Low symptomatic proportions</b>                         |                                   |       |       |                                                                           |                      |                      |
| Clinical attack rate, AR (%)                               | 3.2                               | 5.3   | 7.0   | 9.4                                                                       | 13.0                 | 15.6                 |
| Median number of GP visits per 100,000 population          | 478                               | 789   | 1,053 | 1,866 (1,398; 2,334)                                                      | 2,587 (1,939; 3,236) | 3,115 (2,334; 3,896) |
| Median number of hospitalisations (per 100,000 population) | 23                                | 38    | 51    | 184 (67; 325)                                                             | 255 (93; 450)        | 307 (112; 541)       |
| Median number of deaths (per 100,000 population)           | 5                                 | 8     | 11    | 21 (15; 65)                                                               | 30 (20; 90)          | 35 (24; 109)         |
| Mean total costs (million USD)                             | 94                                | 155   | 205   | 473 (401; 569)                                                            | 656 (557; 789)       | 790 (670; 950)       |
| Productivity losses (% of total costs)                     | 83                                | 83    | 83    | 75 (88; 62)                                                               | 75 (88; 62)          | 75 (88; 62)          |
| <b>High symptomatic proportions</b>                        |                                   |       |       |                                                                           |                      |                      |
| Clinical attack rate, AR (%)                               | 9.0                               | 13.3  | 16.9  | 22.3                                                                      | 29.5                 | 34.8                 |
| Median number of GP visits per 100,000 population          | 1,342                             | 1,983 | 2,521 | 3,329 (4,442; 5,557)                                                      | 5,892 (4,415; 7,370) | 6,946 (5,205; 8,688) |
| Median number of hospitalisations (per 100,000 population) | 65                                | 96    | 122   | 438 (160; 772)                                                            | 581 (212; 1,024)     | 685 (251; 1,207)     |
| Median number of deaths (per 100,000 population)           | 14                                | 20    | 26    | 50 (34; 155)                                                              | 66 (44; 1,024)       | 78 (53; 243)         |
| Mean total costs (million USD)                             | 257                               | 378   | 479   | 1,134 (963; 1,363)                                                        | 1,503 (1,276; 1,807) | 1,770 (1,503; 2,128) |
| Productivity losses (% of total costs)                     | 82                                | 82    | 82    | 75 (88; 62)                                                               | 75 (88; 62)          | 75 (88; 62)          |

a= moderate (severe; very severe) refers to illness severity in the influenza scenario, b=effective reproductive number, c= basic reproductive number, cd= 35% of children aged < 16 years, and 25% of adults aged 16+ years develop symptoms, e=65% of children aged < 16 years, and 55% of adults aged 16+ years develop symptoms

1  
2  
3  
4 The mean total costs of influenza in Norway, including productivity losses and  
5  
6 healthcare resource use ranged from \$94–\$479 million USD for seasonal epidemics, \$401–  
7  
8 1,503 million for moderate pandemics, \$473–1,770 million for severe pandemics, and \$569–  
9  
10 2,128 million for very severe pandemics. Production losses made up the majority of the total  
11  
12 costs. The proportion of the total costs owing to productivity losses was 82–83% during  
13  
14 seasonal influenza, and 62–82% during pandemic influenza. The proportion was lowest  
15  
16 during very severe pandemic influenza, where the healthcare costs increased substantially.  
17  
18 (Fig S1).  
19  
20  
21  
22

### 23 **Epidemiological impact of sick leave interventions in workplaces**

24  
25 Figures 2 and 3 display the intervention effects on the AR, the epidemic peak delay,  
26  
27 and changes in the epidemic curves when compared to the baseline scenarios.  
28  
29

30 For the seasonal influenza scenarios, the AR was reduced by 44.4–98.8% (mean value  
31  
32 of 85.4%) compared with the baseline values (Fig 2A). The interventions achieved the highest  
33  
34 reduction at the lowest transmissibility of  $R_{\text{eff}} = 1.2$  (blue) and at high symptomatic  
35  
36 proportions (solid lines); the relative minimum AR was 60.3% assuming low symptomatic  
37  
38 proportions (stippled lines). As expected, the interventions with a high proportion of workers  
39  
40 on sick leave (90%) and early withdrawal from work/school (0.5 days) had the greatest effect.  
41  
42 General trends in the pandemic scenarios were similar to those obtained in the seasonal  
43  
44 epidemics. However, as the transmissibility in these scenarios was higher on average, the  
45  
46 interventions were less effective. Overall, the interventions reduced the AR by 63.6–99.7%  
47  
48 (mean AR of 91.0%) relative to their baseline values (Fig 2B). Pandemic scenarios with low  
49  
50 symptomatic proportions had a relative minimum AR of 77.3%.  
51  
52  
53  
54  
55  
56  
57  
58  
59  
60

1  
2  
3  
4 In the seasonal influenza scenarios, the interventions delayed the epidemic peak by 0  
5  
6 to 58 days. The delay was particularly pronounced at  $R_{\text{eff}} = 1.2$  (Fig 2C and Fig 3, left  
7  
8 column top panel). The scenarios assuming low symptomatic proportions had a maximum  
9  
10 time delay of 43 days, and most cases exhibited a delay of 1–2 weeks. Pandemic scenarios  
11  
12 resulted in shorter peak time delays than the seasonal scenarios, ranging from 0–20 days (Fig  
13  
14 2D and Fig 3, right column); the delay of time to peak was at most 10 days in scenarios with  
15  
16 low symptomatic proportions.  
17  
18

19  
20 The median age among avoided clinical cases was similar within each scenario,  
21  
22 ranging from 26.7–33.6 years for the seasonal scenarios, and from 33.6–38.1 years for the  
23  
24 pandemic scenarios (Fig S2 and Fig S3). More infections were avoided in younger individuals  
25  
26 when transmissibility or symptomatic proportions were low.  
27  
28

### 29 30 31 **Cost-effectiveness of sick leave interventions in workplaces**

32 Figure 4 summarises the results of the cost-effectiveness analyses for seasonal  
33  
34 influenza (Fig 4A), and for pandemics assuming moderate, severe, and very severe illness  
35  
36 (Fig 4B–D, respectively).  
37  
38

39 In total, for 100% (6/6) of seasonal influenza scenarios, sick leave interventions were  
40  
41 cost-effective compared to current sick leave practice; cost-effective interventions were  
42  
43 obtained for 50% (3/6) of moderate, 50% (3/6) of severe, and 87% (5/6) of very severe  
44  
45 pandemic scenarios. In general, the mean NHB was higher at low transmissibility (blue)  
46  
47 compared to high transmissibility (red), assuming that all other factors remained equal (Fig 4).  
48  
49 The mean NHB was larger at high symptomatic proportions (squares) compared to low  
50  
51 symptomatic proportions (crosses), for similar transmissibility.  
52  
53  
54  
55  
56  
57  
58  
59  
60



1  
2  
3  
4 In the pandemic scenarios assuming low symptomatic proportions, interventions were  
5  
6 cost-effective for  $R_0 < 1.6$ , except in the case of a very severe pandemic where interventions  
7  
8 were also cost-effective for  $R_0 = 1.6$  (Fig 4B-D). For pandemic influenza with high  
9  
10 symptomatic proportions, all scenarios at  $R_0 < 1.8$  produced cost-effective interventions. For  
11  
12 very severe pandemic scenarios, cost-effective interventions were also found for  $R_0 = 1.8$ .  
13  
14  
15

16 In 16 of the 17 scenarios for which interventions were cost-effective, the superior  
17  
18 intervention was for 90% of ill workers to take sick leave within one-half day of the onset of  
19  
20 symptoms. (Fig 4 and Fig S1). While in one scenario, a seasonal epidemic at  $R_{eff} = 1.4$  with  
21  
22 low symptomatic proportions, 90% of symptomatic workers taking sick leave at the baseline  
23  
24 delay from symptom onset, was the most cost-effective intervention. In this particular case,  
25  
26 the combination of 90% of symptomatic workers taking sick leave and sick leave onset within  
27  
28 0.5 days ranked third in terms of cost effectiveness. Generally, when symptomatic proportions  
29  
30 were low, the only cost-effective interventions were those in which sick leave onset occurred  
31  
32 within 0.5 days, or interventions solely increasing the adherence. In contrast, scenarios with  
33  
34 high symptomatic proportions produced cost saving results for a variety of different  
35  
36 interventions.  
37  
38  
39  
40  
41

42 Among the cost-effective interventions, the largest mean NHB was in the range 31–  
43  
44 535 quality adjusted life years (QALYs) for low symptomatic proportions and 1,506–2,898  
45  
46 QALYs for high symptomatic proportions in the seasonal scenarios. For pandemic scenarios  
47  
48 with low symptomatic proportions, interventions were cost-effective for moderate and severe  
49  
50 scenarios with low transmissibility ( $R_0=1.4$ ), and for very severe scenarios with low and  
51  
52 moderate transmissibility ( $R_0=1.4$  and  $R_0=1.6$ ). The largest mean NHBs were 292, 477,  
53  
54 and 170–1,185 QALYs for assumptions of moderate, severe, and very severe  
55  
56  
57  
58  
59  
60

1  
2  
3  
4 morbidity/mortality, respectively. For high symptomatic proportions, the QALY value varied  
5  
6 from 345–3,749, 1,966–4,481, and 1,859–7,256 for moderate, severe, and very severe  
7  
8 morbidity/mortality, respectively.  
9

10  
11 Notably, interventions that focused exclusively on increasing the proportion of  
12  
13 symptomatic workers taking sick leave, had comparatively high probabilities of being cost-  
14  
15 effective, as shown by the stochastic simulations and illustrated in acceptability curves (Fig  
16  
17 S4). Conversely, interventions with sick leave starting later than one day after the onset of  
18  
19 symptoms were generally not cost-effective, except for scenarios with high symptomatic  
20  
21 proportions, or when combined with an increased proportion of symptomatic workers taking  
22  
23 sick leave.  
24  
25  
26  
27

#### 28 **Sensitivity analyses: assuming extra mixing for individuals absent from work**

29  
30 In the sensitivity analyses where additional mixing in the household and the general  
31  
32 population was assumed, the effectiveness of sick leave interventions was somewhat  
33  
34 diminished compared with the main scenarios (Fig S5). However, on the whole, the cost-  
35  
36 effectiveness and ranking of the different interventions under the various scenarios were  
37  
38 retained (Fig S6 and Fig S7). The reduction in the AR relative to the baseline varied from  
39  
40 52.7–99.4% in the seasonal scenarios, and 69.1–99.7% in the pandemic scenarios (Fig S5). In  
41  
42 total, 83% (5/6) of seasonal scenarios, and 33% (2/6) of moderate, 50% (3/6) of severe, and  
43  
44 67% (4/6) of very severe pandemic scenarios produced cost-saving interventions. Consistent  
45  
46 with the results obtained in the main analyses, the best intervention for the scenarios with  
47  
48 cost-effective results was 90% of symptomatic workers taking sick leave with withdrawal at  
49  
50 0.5 days after the onset of symptoms. For this intervention, the mean NHB varied from 101–  
51  
52  
53  
54  
55  
56  
57  
58  
59  
60

1  
2  
3  
4 2,192 QALYs for seasonal epidemics, and from 168–2,414, 131–3,019, and 388–5,314  
5  
6 QALYs for moderate, severe, and very severe pandemics, respectively.  
7  
8  
9

## 10 **Discussion**

11  
12  
13 We have shown that the effectiveness of sick leave during influenza on reducing the spread of  
14 the disease is dependent on: i) timing of absence onset, ii) the proportion of ill workers  
15 leaving work, and iii) the characteristics of the influenza epidemic (transmissibility, influenza  
16 severity, etc.). The results of our study indicate that the earlier the absence and the greater the  
17 proportion leaving work, the greater the effectiveness. Leaving work more than two days after  
18 onset of symptoms has minimal impact on the spread of the disease. Even when taking costs  
19 of lost production into account, early absence among high proportions of workers is cost-  
20 effective in most disease scenarios. Exceptions are pandemics with low transmissibility and  
21 general epidemics with low symptomatic proportions.  
22  
23  
24  
25  
26  
27  
28  
29  
30  
31  
32

33  
34 The modelling approach allowed us to simulate population level effects of different  
35 sick leave interventions under a range of possible influenza scenarios, providing information  
36 that would not readily be observed in real-life studies. The scenarios presented are largely  
37 consistent with those proposed in a recent review on pandemic influenza scenarios in Europe,  
38 in which the authors argued for the use of multiple scenarios based on the recent experience  
39 from the 2009 H1N1 pandemic<sup>23</sup>. Other studies address the effects of expanding the right to  
40 sick leave<sup>4 24</sup>, but since access to paid sick leave is more or less universal in Norway, we have  
41 focused specifically on different sick leave interventions. Our study is the first to investigate  
42 epidemiological and economic outcomes of workplace-based interventions on a population  
43  
44  
45  
46  
47  
48  
49  
50  
51  
52  
53  
54  
55  
56  
57  
58  
59  
60

1  
2  
3  
4 level. We are also the first, to our knowledge, to investigate the effects of the timeliness of  
5  
6 sick leave initiation relative to symptom onset during influenza.  
7

8  
9 Our results indicate that early withdrawal is important for cost-effectiveness, but this  
10  
11 result may depend on the ability to differentiate influenza from other illnesses with similar  
12  
13 symptoms. Because influenza symptoms are non-specific, and it is unknown whether sick  
14  
15 leave interventions are cost-effective for illnesses with influenza-like symptoms, e.g.  
16  
17 respiratory syncytial virus (RSV), early withdrawal may not be as cost-effective in practice.  
18  
19 Influenza surveillance data, which is available in many countries, could be used to restrict  
20  
21 recommendations to apply only in geographic regions where influenza activity is rising.  
22  
23 Another central question is how these sick leave recommendations can be communicated  
24  
25 effectively to the working population and the costs of achieving the sick leave behaviours  
26  
27 described. In our study, the cost-effective interventions were also assumed to be the most  
28  
29 costly to implement, with a mean cost of \$5.6 million; but the true cost is uncertain. A pilot  
30  
31 study could be initiated to assess costs and feasibility of earlier sick leave and increased  
32  
33 proportion of symptomatic workers taking sick leave.  
34  
35  
36  
37

38  
39 Our study has several limitations. The profile of infectiousness assumed in our model  
40  
41 was an influential variable. Although it was based on data from a household study, we  
42  
43 acknowledge that there is uncertainty related to how infectiousness changes over time, and to  
44  
45 the relative infectivity of an asymptomatic infection. The proportion of GP visits and hospital  
46  
47 admissions, and the case-fatality rate assumed under different influenza scenarios were based  
48  
49 on estimates proposed by Norwegian experts, and were not age-specific. A recent review  
50  
51 reported lower estimates in other European countries,<sup>23</sup> but these values are likely country-  
52  
53 specific. Another limitation of this study was that influenza illness has been shown to reduce  
54  
55  
56  
57  
58  
59  
60

1  
2  
3  
4 productivity at work,<sup>25</sup> however, this may vary depending on occupation. We assumed that  
5  
6 8% of workers would continue to work from home during their illness and while taking care  
7  
8 of sick children, but information on this topic is scarce. A study from Sweden found that 60%  
9  
10 of parents work from home when their children are sick<sup>26</sup> thus our assumption may  
11  
12 underestimate the economic benefit of the intervention. The economic benefits from earlier  
13  
14 onset of sick leave may also have been underestimated. It seems plausible that earlier sick  
15  
16 leave onset could lead to a quicker recovery, however, we could not find any evidence of this  
17  
18 in the literature; therefore, we assumed the recovery period to be constant, and independent of  
19  
20 sick leave onset. Finally, influenza cases and workplace absences were modelled to occur  
21  
22 randomly on a population level. In reality, absences may cluster in specific workplaces, which  
23  
24 may cause understaffing for critical functions and a subsequent increase in cost.  
25  
26  
27  
28  
29

30 We assumed that the number of days of sick leave was 3.5 calendar days for seasonal  
31  
32 influenza and 6.5 calendar days for pandemic influenza. Because we found that the  
33  
34 epidemiological benefits of sick leave were limited after 2 days of symptoms, we also  
35  
36 explored the effect of assuming the same number of total absence days during pandemics as  
37  
38 during epidemics (3.5 calendar days). This resulted in higher economic benefits for  
39  
40 interventions involving early onset within one day, but lower benefits for other interventions.  
41  
42  
43

44 Current recommendations on sick leave during influenza are typically focused on the  
45  
46 duration of sick leave, but the present results suggest that recommendations may be improved  
47  
48 by encouraging prompt initiation of sick leave. However, although sick leave can reduce the  
49  
50 spread of influenza, our findings indicate that this effect is insufficient to offset an ongoing  
51  
52 epidemic or pandemic so, ideally, sick leave interventions should be implemented in  
53  
54 conjunction with existing strategies. Economic evaluations of mitigation interventions such as  
55  
56  
57  
58  
59  
60

1  
2  
3  
4 vaccines, antivirals, and school closures, are common in the literature.<sup>27-29</sup> In contrast, studies  
5  
6 on sick leave interventions are limited <sup>28 29</sup>, which is somewhat surprising considering that this  
7  
8 is a widespread recommendation in national pandemic preparedness plans.<sup>3</sup> Moreover,  
9  
10 pharmaceutical interventions are limited by availability<sup>30</sup>; therefore non-pharmaceutical  
11  
12 interventions can be considered as viable backup strategies. As a result, there is a need for  
13  
14 quantitative modelling for policy planning and decision-making purposes. The present  
15  
16 economic results are based on Norwegian demographic and economic assumptions, and  
17  
18 several factors would need to be recalculated for use in other countries. Nevertheless, our  
19  
20 model provides a structure for analysing this problem and provides a method, which could be  
21  
22 applied in other settings.  
23  
24  
25

26  
27  
28 The findings in this paper indicate that there are epidemiological and economic  
29  
30 benefits from sick leaves during influenza, however further studies are needed to assess these  
31  
32 effects in more detail and in other settings. Future studies should consider collecting  
33  
34 additional data on influenza transmission pathways, sick leave practice and the behaviour of  
35  
36 workers during sick leave. Ideally, such studies should also aim to test for influenza to  
37  
38 establish aetiology, rather than relying on self-reported influenza status. Moreover, it is of  
39  
40 importance to conduct studies to explore the effects of sick leave interventions within specific  
41  
42 occupational groups. For example, influenza has been found to be less prevalent in janitors  
43  
44 and technicians compared with other occupations.<sup>31</sup> Likewise, some workers may be more  
45  
46 likely to spread influenza (e.g. a waiter in a restaurant), or be more likely to spread influenza  
47  
48 to high-risk persons (e.g. healthcare workers). Finally, investigations into the cost-  
49  
50 effectiveness of sick leave interventions for other communicable diseases, perhaps especially  
51  
52 those with high illness severity or low transmissibility, are warranted.  
53  
54  
55  
56  
57  
58  
59  
60

## Conclusion

Recommending early absence from work among all workers with influenza symptoms represents an effective intervention during influenza epidemics and pandemics. The intervention is also cost-effective in most influenza scenarios.

For peer review only

## List of abbreviations

AR: Attack rate

QALY: Quality adjusted life year

R<sub>0</sub>: Basic reproductive number

R<sub>eff</sub>: Effective reproductive number

NHB: Net health benefit

GP: General practitioner

EQ-5D: EuroQol 5 D

## Author contributions

The study was designed by BFdB, CHE, and ISK. The mathematical model was designed by BFdB and GST, and the economic model was developed by CHE, ISK, and RW. The data analysis was performed by CHE and BFdB. The manuscript was prepared by CHE and BFdB.

All authors revised and accepted the final manuscript.

## Acknowledgements

The authors wish to thank Siri Helene Hauge and Olav Hungnes of the Norwegian Institute of Public Health for their insightful comments and guidance on influenza and influenza-related policies. We would also like to thank Arna Desser for her assistance with proofreading the article.



## Data sharing

The main sources of data have been provided in the text of the main article or in the supplementary files, however, additional information can be provided by the authors on request.

## Funding

This research received no specific grant from any funding agency in the public, commercial, or not-for-profit sectors.

## Competing interests

All authors have completed the ICMJE uniform disclosure form and declare: no support from any organisation for the submitted work; no financial relationships with any organisations that might have an interest in the submitted work in the previous three years; and no other relationships or activities that could appear to have influenced the submitted work.

## Ethical considerations

Informed consent was obtained from all survey participants of the survey. The study was reviewed by the Data Protection Official at the University of Oslo, and it was considered that approval from an ethical committee was not required due to the nature/content of the study.

## References

1. World Health Organization. Influenza (seasonal) factsheet No211: World Health Organization; 2009 [08.10.2013]. Available from:  
<http://www.who.int/mediacentre/factsheets/fs211/en/>.
2. Xue Y, Kristiansen I, de Blasio B. Modeling the cost of influenza: the impact of missing costs of unreported complications and sick leave. *BMC public health* 2010;**10**(1):724. doi: 10.1186/1471-2458-10-724.
3. Edwards CH, Tomba GS, Blasio BFd. Influenza in workplaces: transmission, workers' adherence to sick leave advice and European sick leave recommendations *European Journal of Public Health* 2016;**1-8**. doi: 10.1093/eurpub/ckw031.
4. Kumar S, Grefenstette JJ, Galloway D, et al. Policies to reduce influenza in the workplace: impact assessments using an agent-based model. *American Journal of Public Health* 2013;**103**(8):1406-11. doi: 10.2105/AJPH.2013.301269.
5. National Insurance Act. Act 1997-02-28-19. Act relating to national insurance Avd I 1997 Nr. 5LOV-1997-02-28-19 [04.07.2014]. Available from:  
<https://lovdata.no/dokument/NL/lov/1997-02-28-19>.
6. Intensjonsavtale om et mer inkluderende arbeidsliv 4. mars 2014 - 31. desember 2018 (IA-avtalen) 2014 [04.07.2014]. Available from:  
[https://www.regjeringen.no/globalassets/upload/asd/dokumenter/2014/ia\\_20142018/signert\\_ia\\_avtale.pdf](https://www.regjeringen.no/globalassets/upload/asd/dokumenter/2014/ia_20142018/signert_ia_avtale.pdf).

- 1  
2  
3  
4 7. Ose SO, Dyrstad K, Slettebak R, et al. Evaluering av IA-avtalen (2010-2013) 2013  
5  
6 [03.07.2014]. Available from: [http://www.sintef.no/prosjekter/evaluering-av-ia-](http://www.sintef.no/prosjekter/evaluering-av-ia-avtalen-2010-2013/)  
7  
8 avtalen-2010-2013/.
- 9  
10  
11 8. Elder AG, O'Donnell B, McCrudden EA, et al. Incidence and recall of influenza in a cohort  
12  
13 of Glasgow healthcare workers during the 1993–4 epidemic: results of serum testing  
14  
15 and questionnaire. *Bmj* 1996;**313**(7067):1241-42.
- 16  
17  
18  
19 9. Carrat F, Vergu E, Ferguson NM, et al. Time lines of infection and disease in human  
20  
21 influenza: a review of volunteer challenge studies. *American journal of epidemiology*  
22  
23 2008;**167**(7):775-85. doi: 10.1093/aje/kwm375.
- 24  
25  
26  
27 10. Lau LLH, Cowling BJ, Fang VJ, et al. Viral shedding and clinical illness in naturally  
28  
29 acquired influenza virus infections. *Journal of Infectious Diseases*  
30  
31 2010;**201**(10):1509-16. doi: 10.1086/652241
- 32  
33  
34  
35 11. Suess T, Renschmidt C, Schink SB, et al. Comparison of shedding characteristics of  
36  
37 seasonal influenza virus (sub) types and influenza A (H1N1) pdm09; Germany,  
38  
39 2007–2011. *PloS one* 2012;**7**(12):e51653. doi: 10.1371/journal.pone.0051653.
- 40  
41  
42  
43 12. Patrozou E, Mermel LA. Does influenza transmission occur from asymptomatic infection  
44  
45 or prior to symptom onset? *Public health reports* 2009;**124**(2):193.
- 46  
47  
48  
49 13. Nichol KL, Heilly SJD, Greenberg ME, et al. Burden of Influenza-Like Illness and  
50  
51 Effectiveness of Influenza Vaccination among Working Adults Aged 50–64 Years.  
52  
53 *Clinical Infectious Diseases* 2009;**48**(3):292-98. doi: 10.1086/595842
- 54  
55  
56  
57  
58  
59  
60

- 1  
2  
3  
4 14. Carrat F, Sahler C, Rogez S, et al. Influenza burden of illness: estimates from a national  
5  
6 prospective survey of household contacts in France. *Archives of internal medicine*  
7  
8 2002;**162**(16):1842. doi: 10.1001/archinte.162.16.1842.  
9  
10  
11 15. Liao S, Ma Y, Chen J, et al. Paid sick-leave: is it a good way to control epidemics? In:  
12  
13 Glass K, Colbaugh R, Ormerod P, et al., eds. *Complex Sciences: Second*  
14  
15 *International Conference, COMPLEX 2012, Santa Fe, NM, USA, December 5-7,*  
16  
17 *2012, Revised Selected Papers.* Cham: Springer International Publishing, 2013:213-  
18  
19 27.  
20  
21  
22  
23 16. Keech M, Scott A, Ryan P. The impact of influenza and influenza-like illness on  
24  
25 productivity and healthcare resource utilization in a working population.  
26  
27 *Occupational Medicine* 1998;**48**(2):85-90. doi: 10.1093/occmed/48.2.85.  
28  
29  
30  
31 17. Keech M, Beardsworth P. The impact of influenza on working days lost.  
32  
33 *Pharmacoeconomics* 2008;**26**(11):911-24. doi: 10.2165/00019053-200826110-00004  
34  
35  
36  
37 18. Norwegian Institute of Public health. Reviderte råd for anbefalinger om sykefravær ved  
38  
39 influensaliknende sykdom [Revised advice for recommendations on absenteeism due  
40  
41 to influenza-like illness] [13.06.2013]. Available from:  
42  
43 [https://www.fhi.no/globalassets/migrering/dokumenter/pdf/rapport-om-anbefalinger-](https://www.fhi.no/globalassets/migrering/dokumenter/pdf/rapport-om-anbefalinger-om-fravar-ved-sykdom-2009-11-18.pdf.pdf)  
44  
45 [om-fravar-ved-sykdom-2009-11-18.pdf.pdf](https://www.fhi.no/globalassets/migrering/dokumenter/pdf/rapport-om-anbefalinger-om-fravar-ved-sykdom-2009-11-18.pdf.pdf).  
46  
47  
48  
49 19. Johns G. Presenteeism in the workplace: A review and research agenda. *Journal of*  
50  
51 *Organizational Behavior* 2010;**31**(4):519-42. doi: 10.1002/job.630.  
52  
53  
54 20. Central bank of Norway. Exchange rate for USD. 2013. [14.08.2015]. Available from:  
55  
56 <http://www.norges-bank.no/Statistikk/Valutakurser/>.  
57  
58  
59  
60

- 1  
2  
3  
4 21. Norwegian Directorate of Health. Helseeffekter i samfunnsøkonomiske analyser. 2007  
5  
6 [20.06.2014]. Available from:  
7  
8 [https://helsedirektoratet.no/lists/publikasjoner/attachments/643/helseeffekter-i-](https://helsedirektoratet.no/lists/publikasjoner/attachments/643/helseeffekter-i-samfunnsokonomiske-analyser-is-1435.pdf)  
9  
10 [samfunnsokonomiske-analyser-is-1435.pdf](https://helsedirektoratet.no/lists/publikasjoner/attachments/643/helseeffekter-i-samfunnsokonomiske-analyser-is-1435.pdf).  
11  
12  
13  
14 22. Ministry of Health and Care Services. Norwegian National Influenza Pandemic  
15  
16 Preparedness Plan 2006 [17.07.2014]. Available from:  
17  
18 [https://www.regjeringen.no/no/dokumenter/nasjonalt-beredskapsplan-for-pandemisk-](https://www.regjeringen.no/no/dokumenter/nasjonalt-beredskapsplan-for-pandemisk-in/id102132/)  
19  
20 [in/id102132/](https://www.regjeringen.no/no/dokumenter/nasjonalt-beredskapsplan-for-pandemisk-in/id102132/).  
21  
22  
23  
24 23. Napoli C, Fabiani M, Rizzo C, et al. Assessment of human influenza pandemic scenarios  
25  
26 in Europe. *Euro Surveill*: 2015;**20**(7).  
27  
28  
29 24. Kumar S, Quinn SC, Kim KH, et al. The impact of workplace policies and other social  
30  
31 factors on self-reported influenza-like illness incidence during the 2009 H1N1  
32  
33 pandemic. *American Journal of Public Health* 2012;**102**(1). doi:  
34  
35 10.2105/AJPH.2011.300307.  
36  
37  
38  
39 25. Brouwer WB, Van Exel N, Koopmanschap M, et al. Productivity costs before and after  
40  
41 absence from work: as important as common? *Health Policy* 2002;**61**(2):173-87. doi:  
42  
43 10.1016/S0168-8510(01)00233-0.  
44  
45  
46  
47 26. Novus. Unionen – Privata tjänstemän om att vobba 2015: Unionen; 2015 [14.04.2015].  
48  
49 Available from: <http://www.unionenopinion.se>.  
50  
51  
52 27. Lee VJ, Lye DC, Wilder-Smith A. Combination strategies for pandemic influenza  
53  
54 response-a systematic review of mathematical modeling studies. *BMC medicine*  
55  
56 2009;**7**(1):76. doi: 10.1186/1741-7015-7-76.  
57  
58  
59  
60

- 1  
2  
3  
4 28. Aledort JE, Lurie N, Wasserman J, et al. Non-pharmaceutical public health interventions  
5  
6 for pandemic influenza: an evaluation of the evidence base. *BMC Public Health*  
7  
8 2007;**7**(1):208. doi: 10.1186/1471-2458-7-208.  
9  
10  
11 29. Crabtree A, Henry B. Non-pharmaceutical measures to prevent influenza transmission: the  
12  
13 evidence for individuals protective measures: National Collaborating Center for  
14  
15 Infectious Diseases, 2011.  
16  
17  
18  
19 30. Bell D, Nicoll A, Fukuda K, et al. Non-pharmaceutical interventions for pandemic  
20  
21 influenza, international measures. *Emerging infectious diseases* 2006;**12**(1):81-87.  
22  
23 doi: 10.3201/eid1201.051370.  
24  
25  
26  
27 31. Anderson NJ, Bonauto DK, Fan ZJ, et al. Distribution of influenza-like illness (ILI) by  
28  
29 occupation in Washington State, September 2009–August 2010. *PloS one*  
30  
31 2012;**7**(11):e48806. doi: 10.1371/journal.pone.0048806.  
32  
33  
34  
35  
36  
37  
38  
39  
40  
41  
42  
43  
44  
45  
46  
47  
48  
49  
50  
51  
52  
53  
54  
55  
56  
57  
58  
59  
60

## Figure Legends

**Figure 1:** Schematic representation of our model. An age-stratified SEIR model is used to model influenza spread; following infection, susceptible individuals ( $S$ ) enter the incubation state, divided into pre-infectious ( $E1-E6$ ) ( $E$ ) and infectious ( $E7-E8$ ) compartments. A proportion of individuals develop asymptomatic infection ( $AsymI-I4$ ) followed by recovery; the remainder develop symptomatic infection, categorized into people at school/work ( $SymI-I4$ ), or people at home ( $SymhI-SymhI4$ ). Infectious individuals (red box, collectively denoted by  $I$ ) mix with susceptible individuals in school, workplace, general community, and household settings; people at home during illness experience reduced mixing outside their households. When the infectious period ends, individuals are moved to the Removed class ( $R$ ), not participating in disease spread anymore. Influenza scenarios are defined by: initial proportions of susceptible persons, transmissibility, proportions of asymptomatic individuals, and severity (red arrows). Influenza interventions are modelled by varying the timing and proportion of workers who take sick leave (yellow arrow). Healthcare utilization and deaths were estimated based on the age-specific incidence of symptomatic infections. Direct costs and effects include healthcare/medication costs, and quality of life detriments due to morbidity and mortality (blue box). People who work during illness and people who stay home from work due to own illness or to provide caregiving incur indirect costs due to lost productivity (green box). See Supplementary File 1 for further details about the model structure.

**Figure 2:** Impact of workplace-based interventions on clinical attack rate and timing of peak for seasonal epidemics (panels A and C) and for pandemics (panels B and D). Scenarios

1  
2  
3  
4 assuming low symptomatic proportions (35% children, 25% adults develop symptoms) are  
5  
6 depicted with stippled lines; scenarios assuming high symptomatic proportions (65% children,  
7  
8 55% adults develop symptoms) are depicted with solid lines. Each level of transmissibility  
9  
10 has a unique colour (blue = lowest transmissibility, green = medium transmissibility, and red  
11  
12 = highest transmissibility). The figure shows sick leave interventions with 65% and 90%  
13  
14 adherence combined with absence onset within 0.5, 1, 1.5, 2, and 4 days. The baseline  
15  
16 intervention (65% adherence and sick leave onset within 4 days of symptom onset) is  
17  
18 indicated by \*\*.

19  
20  
21  
22  
23 **Figure 3:** Impact of workplace-based interventions on the epidemic and pandemic curves in  
24  
25 all main scenarios. Daily incidence in baseline scenarios are depicted for seasonal epidemics  
26  
27 at  $R_{\text{eff}}=1.2, 1.3$  and  $1.4$  (left column) and for pandemic influenza at  $R_0=1.4, 1.6$  and  $1.8$   
28  
29 (right column). In each panel, the solid lines depict the baseline scenario (65% adherence and  
30  
31 sick leave onset within 4 days of symptom onset) assuming low symptomatic proportions  
32  
33 (35% children, 25% adults develop symptoms), and the striped lines depict the baseline  
34  
35 scenario assuming high symptomatic proportions (65% children, 55% adults develop  
36  
37 symptoms). The shaded grey regions illustrate the range of curves obtained when introducing  
38  
39 the 14 different workplace-based interventions.  
40  
41  
42  
43  
44

45 **Figure 4:** Mean Net Health Benefit (NHB) of workplace-based interventions for all main  
46  
47 scenarios; seasonal epidemics (A), moderate pandemics (B), severe pandemics (C), very  
48  
49 severe pandemics (D). Scenarios assuming low symptomatic proportions (35% children, 25%  
50  
51 adults develop symptoms) are depicted with crosses, and scenarios assuming high  
52  
53 symptomatic proportions (65% children, 55% adults develop symptoms) are depicted with  
54  
55  
56  
57  
58  
59  
60



1  
2  
3  
4 squares. Each level of transmissibility has a unique colour (blue = lowest transmissibility,  
5  
6 green = medium transmissibility, and red = highest transmissibility).  
7  
8  
9  
10  
11  
12  
13  
14  
15  
16  
17  
18  
19  
20  
21  
22  
23  
24  
25  
26  
27  
28  
29  
30  
31  
32  
33  
34  
35  
36  
37  
38  
39  
40  
41  
42  
43  
44  
45  
46  
47  
48  
49  
50  
51  
52  
53  
54  
55  
56  
57  
58  
59  
60

For peer review only

1  
2  
3  
4  
5  
6  
7  
8  
9  
10  
11  
12  
13  
14  
15  
16  
17  
18  
19  
20  
21  
22  
23  
24  
25  
26  
27  
28  
29  
30  
31  
32  
33  
34  
35  
36  
37  
38  
39  
40  
41  
42  
43  
44  
45  
46  
47  
48  
49  
50  
51  
52  
53  
54  
55  
56  
57  
58  
59  
60

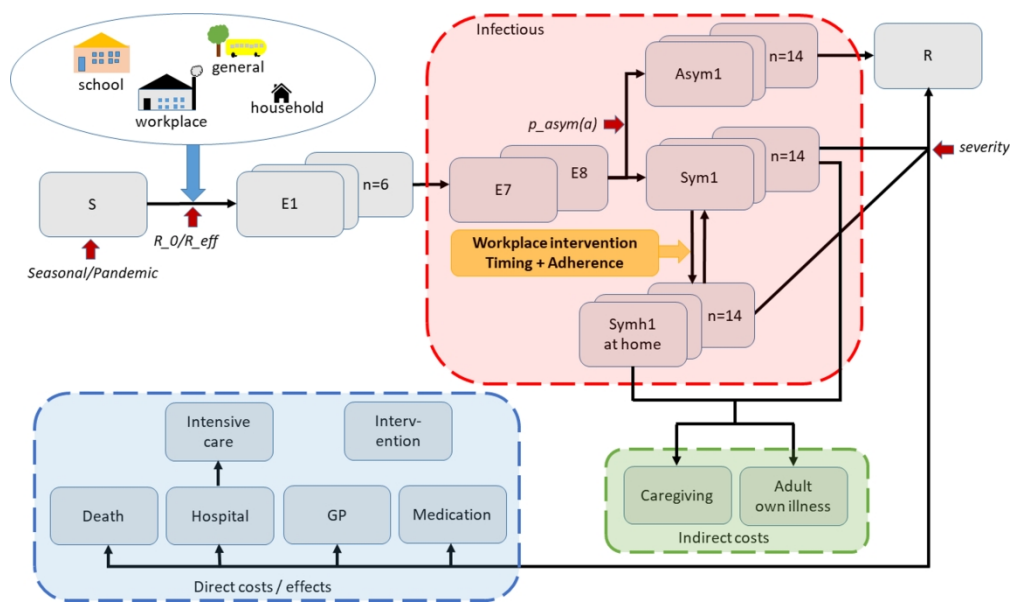

Fig 1

299x176mm (300 x 300 DPI)



Fig 2

338x148mm (300 x 300 DPI)

1  
2  
3  
4  
5  
6  
7  
8  
9  
10  
11  
12  
13  
14  
15  
16  
17  
18  
19  
20  
21  
22  
23  
24  
25  
26  
27  
28  
29  
30  
31  
32  
33  
34  
35  
36  
37  
38  
39  
40  
41  
42  
43  
44  
45  
46  
47  
48  
49  
50  
51  
52  
53  
54  
55  
56  
57  
58  
59  
60



Fig 3

313x120mm (300 x 300 DPI)

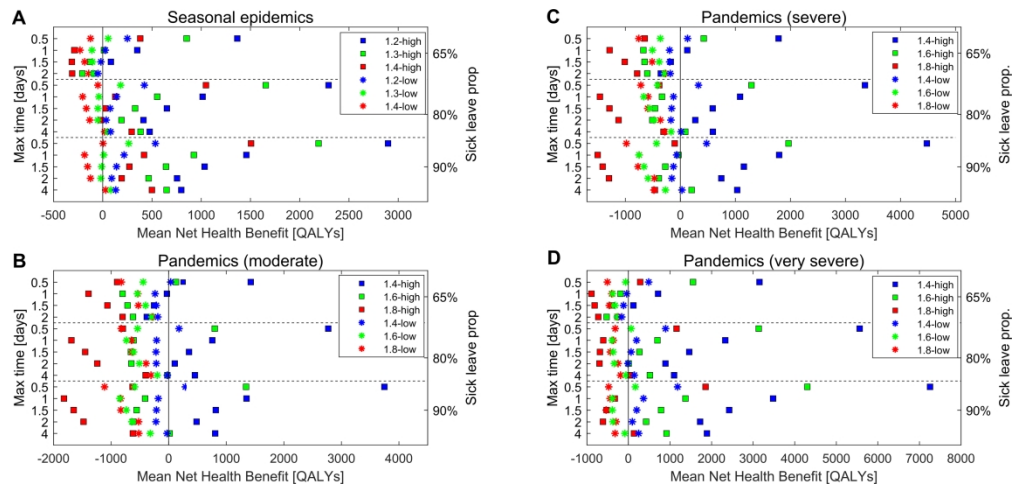

Mean Net Health Benefit (NHB) of workplace-based interventions for all main scenarios; seasonal epidemics (A), moderate pandemics (B), severe pandemics (C), very severe pandemics (D). Scenarios assuming low symptomatic proportions (35% children, 25% adults develop symptoms) are depicted with crosses, and scenarios assuming high symptomatic proportions (65% children, 55% adults develop symptoms) are depicted with squares. Each level of transmissibility has a unique colour (blue = lowest transmissibility, green = medium transmissibility, and red = highest transmissibility).

279x132mm (300 x 300 DPI)

1  
2  
3  
4  
5  
6  
7

## Evaluating costs and health consequences of sick leave strategies against pandemic and seasonal influenza in Norway using a dynamic model

8 Christina Hansen Edwards<sup>1</sup>, Gianpaolo Scalia Tomba<sup>2</sup>, Ivar Sønbo Kristiansen<sup>3</sup>, Richard  
9 White<sup>4</sup>, Birgitte Freiesleben de Blasio<sup>4,5</sup>

10  
11  
12  
13  
14  
15  
16  
17  
18  
19  
20  
21  
22  
23  
24  
25  
26  
27  
28  
29  
30  
31  
32  
33  
34  
35  
36  
37  
38  
39  
40  
41  
42  
43  
44  
45  
46  
47  
48  
49  
50  
51  
52  
53  
54  
55  
56  
57  
58  
59  
60

<sup>1</sup>Department of Health and Inequality, Norwegian Institute of Public Health, P.O. Box 0403. 4403  
Nydalen, Oslo, Norway.

<sup>2</sup>Department of Mathematics, University of Rome Tor Vergata, Via Ricerca Scientifica 00133 Roma,  
Italy.

<sup>3</sup>Department of Health Management and Health Economics, Institute for Health and Society,  
University of Oslo. P.O.Box 1130. 0318 Blindern, Oslo, Norway.

<sup>4</sup>Department of Infectious Disease Epidemiology and Modelling, Norwegian Institute of Public  
Health, P.O. Box 0403. 4403 Nydalen, Oslo, Norway.

<sup>5</sup>Oslo Centre for Biostatistics and Epidemiology. Department of Biostatistics. Institute of Basic  
Medical Sciences. University of Oslo. P.O.Box 1122. 0317 Blindern, Oslo, Norway.

Correspondence to: CH Edwards [Christina.hansen.edwards@fhi.no](mailto:Christina.hansen.edwards@fhi.no)

### SUPPLEMENTARY FILE 1: MATERIALS AND METHODS

## **SURVEY ON INFLUENZA-RELATED SICK LEAVE AMONG NORWEGIAN EMPLOYEES**

A questionnaire consisting of 14 questions was issued either electronically via Questback©, or on paper via personal distribution to a convenience sample of Norwegian employees in the Oslo area between November 2013 and January 2014. The convenience sample was selected based on network recruitment, and consisted mainly of public sector employees. All data gathered on paper were folded and placed in an envelope, and were later entered into Questback©, and the original responses were destroyed. The data were stored in Questback© and analyzed in Excel 2013. Once analyses were completed the original data and any imported copies were deleted. The first 6 questions were concerning age, gender, inclusive work life status of employer, household size, the number of children below 12 years living in the household, and presence of influenza-like symptoms in the previous season (defined as August 2012 to April 2013). Questions 7-9 were only asked to the respondents who indicated having children below the age of 12 living in the household. The questions addressed: whether these children had experienced influenza-like symptoms in the previous winter, whether the children were sick simultaneously with the respondent, and if yes, the number of days of sickness overlap. The last 4 questions were asked to respondents who indicated having experienced influenza-like symptoms in the previous season. The respondents were asked to indicate the number of days of symptoms, the number of days spent at home from work during the symptomatic period (and which symptomatic days were spent at home), whether the days spent at home were GP-certified or self-certified, at what day of symptoms a physician was contacted, and on which days (if any) children below the age of 12 were sick simultaneously with the respondent.

A total of 490 employees completed the questionnaire. 72% of the respondents were females, and the remaining 28% were males. The age of the respondents ranged from 20 -70 years, with a mean age of 46. Most (96%) of the employees had employers with an inclusive

work life agreement (IW-agreement). There were no apparent differences between employees with and without IW-employers but the proportion of non-IW respondents was too small to meaningfully compare the two.

Among the 490 respondents, 224 reported having experienced symptoms of influenza last season. The number of days of symptoms varied from 1-20 days with a mean and median of approximately 6.5 and 5, respectively (Figure SMM1). Among the respondents that reported ILI symptoms, 161 respondents were absent from work, 58 respondents did not take time off work, the remaining 5 were missing. The duration of sick leave varied from 1-13 days, with a mean and median of 2.4 and 2 days, respectively.

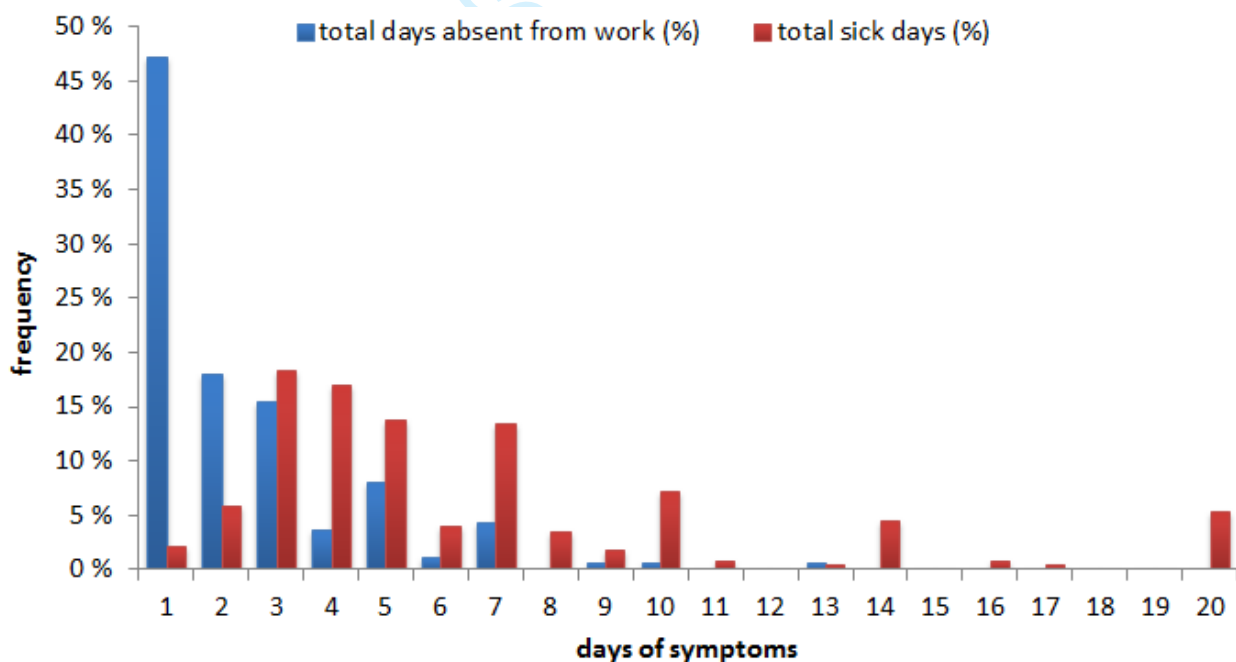

Figure SMM1: Frequency distributions showing the duration of symptoms (N=224) and the distribution of days absent from work (N=161) among respondents with ILI-symptoms.

Of the respondents that had influenza-like illness 20% reported visiting a GP for their symptoms, and 58% of these went on to take sick leave, while 42% continued to work. In total 14% of sick leaves were GP-certified, the remaining were self-certified.



Sick leave was initiated within 1-8 days after symptom onset. The shortest duration between sickness onset and sick leave was less than 1 day, and the longest duration was 7-8 days (Figure SMM2). We did not collect any information about which factors affected the likelihood of staying at home. We suspect that in addition to having mild symptoms at onset, possible explanatory factors for delayed onset of sick leave may be social pressure or deadlines at work. In our paper we truncated the final category into 4 days or later (simulated as 4 days maximum) such that 24% took sick leave on the first day following symptom onset, 43% on the second day, 19% on the third day, and the remaining 14% on the 4<sup>th</sup> day or later.

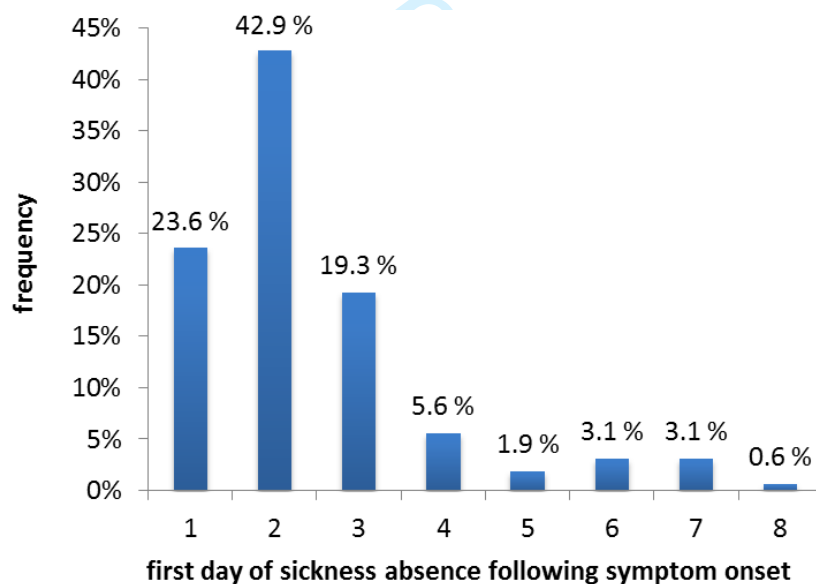

Figure SMM2: Frequency distribution showing the timing of sick leave onset counted in days from the time when symptom appeared ( $N=161$ )

The sick leave periods mainly occurred over consecutive days, with the exception of 5 respondents who reported intermittent sick leave histories. For the latter only the first sick leave period was counted. A total of 15 respondents reported being absent on one or more days without experiencing symptoms on these days; these sick leaves did not seem to be linked with sick children in the household.

1  
2  
3           Among the respondents, 155 said they had children <12 years in the household,  
4  
5 101/155 of the children had been ill in the past winter. The number of children was  
6  
7 significantly correlated ( $p>0.01$ ) with ILI symptoms in parents. The frequency of ILI  
8  
9 symptoms in respondents was 16% higher when the household had one or more children <12  
10  
11 years. There was also a strong correlation ( $p>0.01$ ) between experiencing ILI symptoms and  
12  
13 having sick children. Although the correlation works from parent to child, and from child to  
14  
15 parent, the latter is perhaps more correct as the sample of parents is non-random. If a child<12  
16  
17 in the household was ill, 74% of parents experienced ILI symptoms, otherwise 23% of parents  
18  
19 experienced symptoms.  
20  
21  
22

23  
24           The survey was an attempt at providing a rough estimate of sick leave practice during  
25  
26 influenza among the working population in Norway. Our sample is not representative of the  
27  
28 Norwegian working population, and was largely made up of people working within health  
29  
30 professions. Some respondents indicated that they had been on sick leave on days without  
31  
32 symptoms ( $N = 6$ ), this may be a result of measurement error or could reflect that the sick  
33  
34 leave period was used in its full length as these sick leave periods were 7 days or longer.  
35  
36 Since we were asking about past health states and sick leave behavior, recall bias may have  
37  
38 been a problem. In the responses replies involving round numbers (10 days, 20 days) were  
39  
40 relatively more common. This may have been a result of recall bias.  
41  
42  
43  
44  
45  
46  
47  
48  
49  
50  
51  
52  
53  
54  
55  
56  
57  
58  
59  
60

## Survey on influenza-related sickness absence among Norwegian employees [August 2012 - April 2013]

*Please enter or circle your response*

|            |          |
|------------|----------|
| 1. Age:    |          |
| 2. Gender: | F      M |

|                                                                                                                                                            |           |
|------------------------------------------------------------------------------------------------------------------------------------------------------------|-----------|
| 3. Do you have an employer with an agreement about inclusive worklife (IW-agreement)?                                                                      | Yes    No |
| 4. How many people were living in your household last winter? (including yourself)                                                                         | Yes    No |
| 5. How many children under the age of 12 years were living in your household last winter?                                                                  | Yes    No |
| 6. Did you have flu-like symptoms last winter? Typical symptoms of flu are: fever / cough / sore throat / headache / fatigue / muscle pain / stuffy nose ) | Yes    No |

*(Questions 7-8 are only relevant if you had children under 12 years living in your household last winter)*

|                                                                                                                         |           |
|-------------------------------------------------------------------------------------------------------------------------|-----------|
| 7. Were any of the children (under 12 years living in the household) ill with flu-like symptoms in the previous winter? | Yes    No |
| 8. Were any children ill at the same time as you?                                                                       | Yes    No |

(Questions 9 to 13 are only relevant if you experienced influenza-like symptoms last winter)

| Please indicate the following by ticking the relevant day(s)                                               | Symp tom start |       |       |       |       |       |       |       |       |        |        |        |        |        |        |        |        |        |        |        |  |                      |
|------------------------------------------------------------------------------------------------------------|----------------|-------|-------|-------|-------|-------|-------|-------|-------|--------|--------|--------|--------|--------|--------|--------|--------|--------|--------|--------|--|----------------------|
|                                                                                                            | Day 1          | Day 2 | Day 3 | Day 4 | Day 5 | Day 6 | Day 7 | Day 8 | Day 9 | Day 10 | Day 11 | Day 12 | Day 13 | Day 14 | Day 15 | Day 16 | Day 17 | Day 18 | Day 19 | Day 20 |  |                      |
| 9. On which days did you experience influenza-like symptoms? (for how long were you ill?)                  |                |       |       |       |       |       |       |       |       |        |        |        |        |        |        |        |        |        |        |        |  | More than 14 days    |
| 10. On which days did you stay home from work?                                                             |                |       |       |       |       |       |       |       |       |        |        |        |        |        |        |        |        |        |        |        |  | No days              |
| 11. Which absence days were GP-certified?                                                                  |                |       |       |       |       |       |       |       |       |        |        |        |        |        |        |        |        |        |        |        |  | No days              |
| 12. On which day did you visit a GP?                                                                       |                |       |       |       |       |       |       |       |       |        |        |        |        |        |        |        |        |        |        |        |  | I did not visit a GP |
| 13. On which days were children less than 12 years living in your household experiencing symptoms as well? |                |       |       |       |       |       |       |       |       |        |        |        |        |        |        |        |        |        |        |        |  | Not relevant         |

## THE INFLUENZA MODEL

An age-stratified compartmental SEIR (*Susceptible-Exposed-Infected-Recovered*) model was developed to simulate the spread of influenza. Due to lack of local data, the social mixing patterns were adapted from published synthetic contact matrices, which were based on the simulation of an agent-based virtual population parameterized with detailed Norwegian census and social demographic data<sup>1</sup>. Mixing between age groups (Figure SMM3) were defined using four setting-specific contact matrices, accounting for contacts within households ( $\mathbf{M}^H$ ), contacts within schools ( $\mathbf{M}^S$ ), contacts within workplaces ( $\mathbf{M}^W$ ) and contacts in the general population ( $\mathbf{M}^{GP}$ ). Each matrix provides the relative frequency of contacts between different age classes. The overall contact matrix ( $\mathbf{M}^{tot}$ ) was obtained as a linear combination  $\mathbf{M}_{ij}^{TOT} = \sum_K \alpha_K \mathbf{M}_{ij}^K$ , where  $\alpha_K$  accounts for the proportion of transmission occurring in the various settings,  $K \in \{H, S, W, GP\}$ . The weights,  $\alpha_K$ , were chosen at 0.3 for households, 0.18 for schools, 0.19 for workplaces and 0.33 for transmission occurring in the general community in accordance with empirical observations and previously published studies on influenza-like diseases<sup>1-5</sup>. Further details on the calculation of the mixing matrices are provided elsewhere<sup>1</sup>.

The population was divided into 100 one-year age groups according to the size and age-distribution of the Norwegian population at 1 January 2013<sup>6</sup>. Newly infected individuals pass through an incubation phase which was modelled using 8 compartments ( $E_1, E_2, \dots, E_8$ ). The mean incubation period was fixed at 1.9 days<sup>7</sup> including the  $E_1-E_8$  compartments, and the average latency period was assumed at 1.425 days covering the first six compartments. The mean duration of the infectious phase was assumed at 7.475 days, consisting of  $E_7-E_8$  compartments and 14 infectious compartments, all assumed to last for 0.5 days. The

1  
2  
3 infectious compartments were further split into three groups: people with asymptomatic  
4 infection ( $Asym_1...Asym_{44}$ ), people with symptomatic infection ( $Sym_1...Sym_{44}$ ) and people with  
5 symptomatic infection at home ( $Symh_1...Symh_2$ ). The timing and the rates of flow between the  
6 two latter categories were modelled according to the type of intervention studied, as detailed  
7 in the main text. The variation of infectivity as a function of the duration of time since  
8 infection (the infectivity profile) was adapted from a study on household transmission<sup>5</sup>, which  
9 is in alignment with data from the 2009 H1N1 pandemic where most transmission was found  
10 to occur early after and to peak around the time of symptom onset<sup>7</sup> (Figure SMM4).  
11  
12  
13  
14  
15  
16  
17  
18  
19  
20  
21  
22  
23  
24  
25  
26  
27  
28  
29  
30  
31  
32  
33  
34  
35  
36  
37  
38  
39  
40  
41  
42  
43  
44  
45  
46  
47  
48  
49  
50  
51  
52  
53  
54  
55  
56  
57  
58  
59  
60

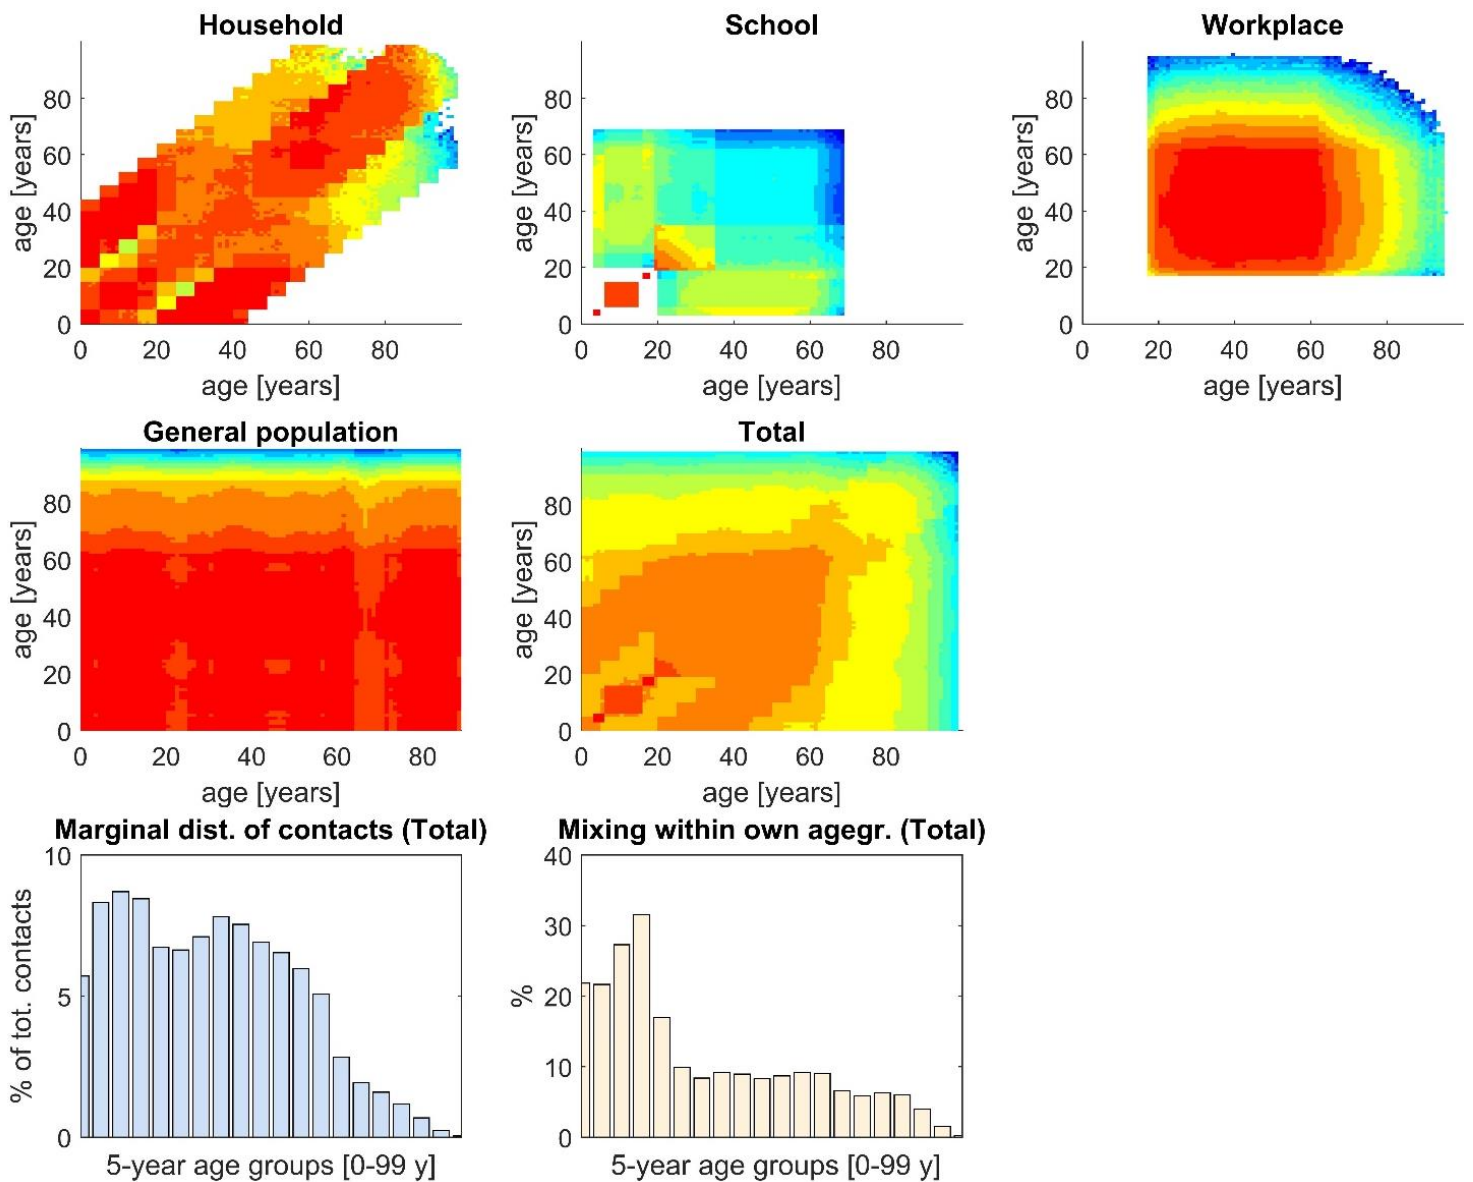

*Figure SMM3: Mixing patterns by age assumed in the model: Mixing matrices of the relative frequency of contacts among age classes in households, schools, workplace and the general population (top rows). The total mixing matrix was obtained as a weighted sum of the setting-specific matrices. The matrices are represented using a logarithmic scale (blue: low intensity; red: high intensity). The bottom row shows the marginal distribution of contacts (left) and the proportion of contacts with people of the same age (right) in the total matrix, aggregated into five-yearly age groups.*

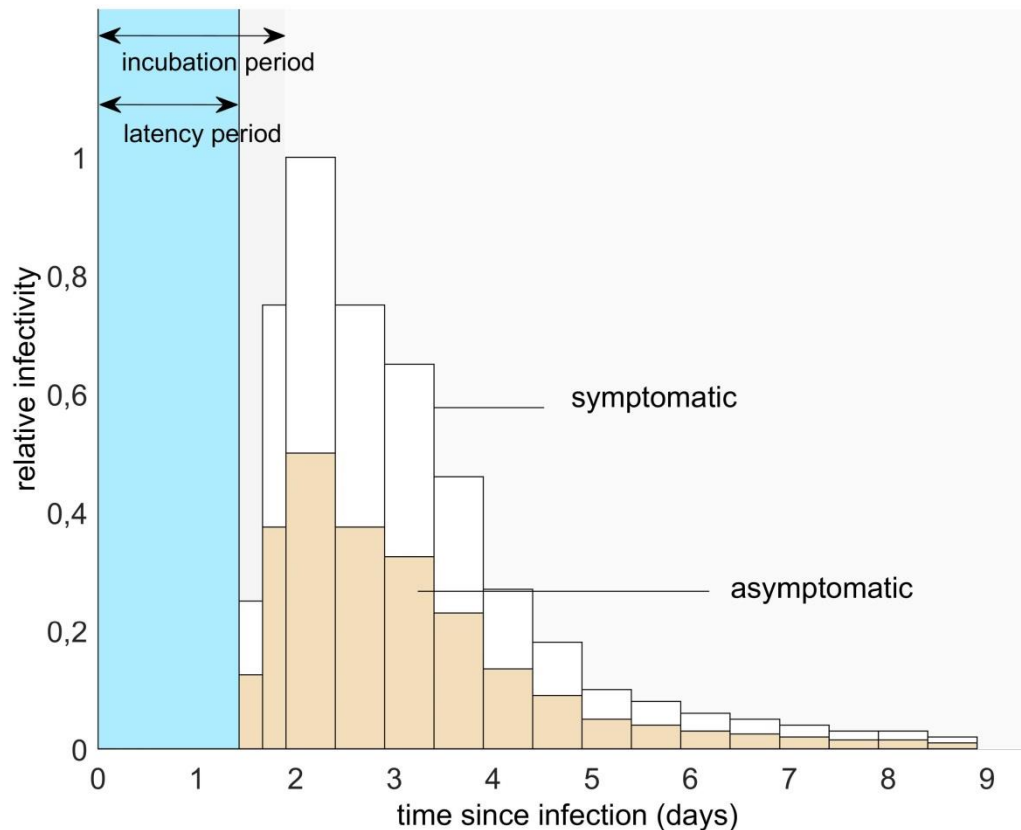

Figure SMM4: Schematic representation of the infectivity profile assumed in the model for individuals with symptomatic and asymptomatic influenza infection. The latency period is 1.5 days, the incubation period is 1.9 days, and infectivity peaks around 2 days after infection.

Recent analyses suggest that approximately 3 in 4 cases of seasonal and pandemic influenza are asymptomatic<sup>8</sup> and we assumed the baseline probability for symptomatic infection to be 0.35 for children <16 years and 0.25 for adults. However, in other scenarios we assumed that 50% of adults and 65% of children < 16 years develop symptoms in accordance with Longini et al.<sup>9</sup>. We assumed higher susceptibility and infectivity in children < 16 years of 1.05 and 1.30, respectively, compared to that of adults based on results from a Norwegian study using data from the 2009-H1N1 pandemic<sup>10</sup>.

We modelled pandemic influenza by assuming a fully susceptible population at the simulation outset and using basic reproductive numbers:  $R_0=1.4, 1.6, \text{ or } 1.8$ . For seasonal influenza we assumed that 0.075, 0.20, and 0.40 of children < 16 years, adults 16-69 years,



1  
2  
3 and elderly 70+ years were fully immune at the simulation outset based on personal  
4 communication with experts at the Norwegian Institute of Public Health. In these simulations  
5  
6 we considered effective reproductive numbers:  $R_{eff}=1.2, 1.3, \text{ and } 1.4$ .  
7  
8  
9

### 10 **Sensitivity analyses**

11  
12  
13 In the main scenarios we modelled sick leave by eliminating mixing at the workplace  
14 (0%) and in the general population (0%). There is lack of knowledge about how people  
15 behave during influenza sickness absence<sup>11</sup>, which impacts both their transmission potential  
16 and whom they will infect. We therefore performed sensitivity analyses by assuming that  
17 people during influenza sick leave would increase their likelihood of transmission in the  
18 household and in the general population. This was implemented in the model by adjusting the  
19 household mixing matrix (+10%) and the general population mixing matrix (-90%) compared  
20 to the mixing assumed in non-infected people at the same age.  
21  
22  
23  
24  
25  
26  
27  
28  
29  
30  
31

### 32 **COST-EFFECTIVENESS**

33 We developed a probabilistic health economic model to capture the health consequences,  
34 healthcare costs, productivity losses from work absences, and campaign cost for each  
35 intervention. The age-specific incidence of clinical events was based on results from the  
36 dynamic model. The probabilities of clinical events leading to a healthcare encounter (general  
37 practitioner (GP) visit or hospitalization) or death were taken from the Norwegian Pandemic  
38 Preparedness Plan<sup>12</sup>. The plan includes distinct morbidity estimates for moderate, severe, and  
39 very severe pandemics. The morbidity during seasonal influenza was assumed similar to a  
40 moderate pandemic (Table SMM1).  
41  
42  
43  
44  
45  
46  
47  
48  
49  
50  
51  
52  
53  
54  
55  
56  
57  
58  
59  
60

**Table SMM1: Parameters of the economic model. Mean values and distributions used for the cost-effectiveness analysis.**

| Parameter                                        | Mean value            | Distribution                                                    | Source               |
|--------------------------------------------------|-----------------------|-----------------------------------------------------------------|----------------------|
| <b>Probability of dying</b>                      |                       |                                                                 |                      |
| Seasonal /moderate pandemic                      | 0.15%                 | <i>Tri</i> (0.0015 ± 0.0009)                                    | *                    |
| Severe pandemic                                  | 0.22%                 | <i>Tri</i> (0.0022 ± 0.00132)                                   |                      |
| Very severe pandemic                             | 0.70%                 | <i>Tri</i> (0.0070 ± 0.0042)                                    |                      |
| <b>Probability of hospitalization</b>            |                       |                                                                 |                      |
| Seasonal / moderate                              | 0.75%                 | <i>Beta</i> (7.49, 992)                                         | **                   |
| Severe pandemic                                  | 2.00%                 | <i>Beta</i> (19.98, 979)                                        |                      |
| Very severe pandemic                             | 3.50%                 | <i>Beta</i> (34.97, 964)                                        |                      |
| <b>Probability of intensive care in hospital</b> |                       |                                                                 |                      |
| Seasonal / Moderate Pandemic                     | 10.00%                | <i>Beta</i> (99, 899)                                           | **                   |
| Severe pandemic                                  | 17.00%                | <i>Beta</i> (169, 829)                                          |                      |
| Very severe pandemic                             | 25.00%                | <i>Beta</i> (250, 749)                                          |                      |
| <b>Probability of visiting a GP</b>              |                       |                                                                 |                      |
| Seasonal / moderate Pandemic                     | 15.00%                | <i>Beta</i> (150, 849)                                          | **                   |
| Severe pandemic                                  | 20.00%                | <i>Beta</i> (200, 799)                                          |                      |
| Very severe pandemic                             | 25.00%                | <i>Beta</i> (250, 749)                                          |                      |
| Probability of working from home when ill        | 8.00%                 | <i>Beta</i> (929, 10825)                                        | ** <sup>13</sup>     |
| Daily productivity loss adults                   | Age-specific (5-year) | Log Normal, mean (provided in ref. 6), 20% variation about mean | *** <sup>6</sup>     |
| Daily productivity loss caretakers               | \$ 337                | <i>ln</i> (337, 4543)                                           | *** <sup>6</sup>     |
| Productivity lost before and after (per absence) | 5.00%                 | <i>ln</i> (0.95, 0.0361)                                        | *** <sup>14</sup>    |
| Productivity when working from home/work         | 65.00%                | <i>ln</i> (0.65, 0.017)                                         | *** <sup>15-17</sup> |
| Cost of a GP consultation                        | \$ 68                 | <i>N</i> (68, 185)                                              | # <sup>18 19</sup>   |
| <b>Cost of medications</b>                       |                       |                                                                 |                      |
| 0-14 years (+5% severe+10% very severe)          | \$ 10.6               | <i>N</i> (10.6, 4.48)                                           | # <sup>20 21</sup>   |
| 15-64 years (+5% severe+10% very severe)         | \$ 10.4               | <i>N</i> (10.4, 4.32)                                           | # <sup>20 21</sup>   |
| 65+ years (+5% severe+10% very severe)           | \$ 14.0               | <i>N</i> (14.0, 7.90)                                           | # <sup>20 21</sup>   |
| <b>Cost of hospitalization</b>                   |                       |                                                                 |                      |
| Non-intensive care                               | \$ 9 503              | <i>Gamma</i> (0.126, 75401)                                     | ## <sup>22</sup>     |
| Intensive care                                   | \$ 20 435             | <i>Gamma</i> (4.3, 4768)                                        | ## <sup>22</sup>     |
| <b>National cost of campaign</b>                 |                       |                                                                 |                      |
| Cost of increasing adherence                     |                       |                                                                 |                      |
| to 80%                                           | \$ 2 040 378          | <i>N</i> (2040378, 408076 <sup>2</sup> )                        |                      |
| to 90%                                           | \$ 3 490 120          | <i>N</i> (3490120, 698024 <sup>2</sup> )                        |                      |
| Cost of earlier onset of sick leave              |                       |                                                                 | # <sup>23</sup>      |
| 2 days of delay                                  | \$ 1 238 321          | <i>N</i> (1238321, 247664 <sup>2</sup> )                        |                      |
| 1.5 days of delay                                | \$ 1 762 679          | <i>N</i> (1762679, 352535 <sup>2</sup> )                        |                      |
| 1 day of delay                                   | \$ 2 418 124          | <i>N</i> (2418124, 483625 <sup>2</sup> )                        |                      |
| 0.5 days of delay                                | \$ 3 237 432          | <i>N</i> (3237432, 647486 <sup>2</sup> )                        |                      |
| <b>QALY losses (per case)</b>                    |                       |                                                                 |                      |
| QALY loss un-hospitalized cases                  | 0.0078                | <i>ln</i> (0.0078, 0.000024)                                    | *** <sup>24 25</sup> |
| QALY loss hospitalized cases                     | 0.0170                | <i>ln</i> (0.017, 0.000012)                                     |                      |
| QALY loss influenza mortality                    | Age-specific (1-year) | Normal, 20% variation about the mean                            | PC                   |

\* Triangular distribution;  $\text{Tri}(a \pm b)$  has mean  $a$  and standard deviation  $b/\sqrt{6}$

\*\* Beta distribution;  $\text{Beta}(a,b)$  has mean  $a/(a+b)$  and standard deviation  $\sqrt{\frac{ab}{(a+b)^2(a+b+1)}}$

\*\*\* Log-normal distribution, parameters are mean and variance of this distribution, standard deviation is 20% of mean

# Normal distribution, parameters are mean and variance of this distribution, standard deviation is 20% of mean

## Gamma distribution;  $\text{Gamma}(a,b)$  has mean  $ab$  and standard deviation  $b\sqrt{a}$

*PC mean* =  $0.94 - 0.002 \times \text{age}$ . Personal communication with Kim Rand-Hendriksen (2014).

## HEALTHCARE COSTS

We compared the number of GP visits, hospitalizations, and deaths as well as the health-related quality of life, under each sick leave intervention, with the baseline intervention (Table SMM1). The cost of an influenza-related hospitalization was estimated using data from the Norwegian Patient Registry, on patients admitted with ICD-10 diagnoses J10-J11 (influenza) and J12-J18 (pneumonia) and discharged with influenza-associated diagnoses. We estimated the average hospitalization cost per patient by identifying the DRG codes most commonly related to influenza and pneumonia. For intensive care patients we used the DRG for diseases in respiratory organs requiring ventilation support as an estimate for the cost per hospitalized case. Costs were computed using the DRG unit price, trim points and cost weights (for 2013).<sup>22</sup> The cost of a GP consultation was assumed at \$68.<sup>18 19</sup>

## MEDICATION COSTS

The types of medication and proportion of users was based on findings in Meier et al.<sup>21</sup>, while use of throat drops and tissues was assumed. The cost of antibiotics was assumed equal to the cost of Fenoksymetylpenicillin<sup>20</sup> deducted VAT. Costs of over-the-counter drugs were based on the average cost at three pharmacies and four grocery stores in Oslo.

### CAMPAIGN COSTS

Each intervention was assumed to involve a campaign to communicate recommendations. We assumed the cost of the baseline intervention (65% compliance, maximum of 4 days from symptom onset to sick leave) to be similar to the campaign cost associated with the 2009 H1N1 Pandemic in Norway (\$USD 1.7 million), equally divided into costs associated with adherence and sick leave onset delay. The campaign costs were assumed to increase by a factor of 1.5 per 10% increase in the adherence, and by a factor of 1.25 per half day reduction in the maximum delay time to work absence. The costs were converted to 2012 monetary equivalents by adjusting for inflation.

### HEALTH EFFECTS

Health related quality measures based on the EuroQol-5D<sup>26</sup> were used to compute QALYs (Quality Adjusted Life Years) associated with mortality and morbidity. QALYs associated with mortality were based on the expected value of remaining life years using age-dependent life-expectancies<sup>27</sup> with a yearly discount rate of 4%. The age distribution of deaths was based on those specified in a Norwegian study of seasonal influenza mortality<sup>28</sup>.

### INDIRECT COSTS

In the baseline intervention (65% compliance, 4 days of maximum delay from symptoms onset to sick leave) we assumed that symptomatic workers would stay at home for an average of 3 workdays for seasonal influenza and 5.21 workdays for pandemic influenza, corresponding to 3.5 and 6.5 calendar days respectively. The average number of workdays lost was higher for interventions that reduced the delay from symptom onset to sick leave, following the implementation of interventions in the dynamic model.

Productivity losses were valued using a human capital approach. Labor costs were based on full-time equivalent wages and the value of labor not returned to the worker. For sick adults, 5-year age-specific wage rates for ages 16-74<sup>6</sup> were used, and for caretakers the average population wage was used. In Norway, all employees have a right to at least 3 days of

1  
2  
3 self-certified leave with full salary, while self-employed workers (8%) may take out insurance  
4 and their income loss during work absenteeism will depend on their insurance policy.<sup>29</sup> About  
5  
6 60% of employees have an inclusive-work life (IW) employer with more flexible sick leave  
7  
8 arrangements and a right to 8 days of self-certified leave. Once the self-certified sick leave  
9  
10 period ends, additional sick leave days require a GP certificate. The first 16 days are covered  
11  
12 by the employer, and additional days by the state.<sup>30-32</sup> For each sick leave event, we included  
13  
14 a productivity loss equal to 5% of the labor cost to account for productivity losses before and  
15  
16 after the sick leave period<sup>14</sup>. We assumed that 8% of adults on sick leave worked from home,  
17  
18 guided by the proportion working from home from a 2009 survey.<sup>13</sup> Sick persons working  
19  
20 from home, and workers going to work despite feeling ill were assumed to work at 65% of  
21  
22 full capacity<sup>15-17</sup> In Norway, parental leave is 1 year and parents have the right to care benefits  
23  
24 during child sickness when the child <12 years.<sup>33</sup> Therefore all ill children between 1 and 12  
25  
26 years of age were assumed to require parental care. We assumed that 15% of parents were  
27  
28 homemakers<sup>34</sup> with no associated productivity loss. Overlap between parental and child  
29  
30 sickness absences, which was found to be 37.5% in our sick leave survey, was also adjusted  
31  
32 for.  
33  
34  
35  
36  
37  
38  
39

#### 40 SENSITIVITY ANALYSES

41 For each epidemiological scenario (seasonal influenza  $R_{eff} = 1.2-1.4$  with moderate  
42 morbidity; pandemic influenza  $R_0 = 1.4-1.8$  with moderate, severe, or very severe morbidity)  
43  
44 we performed a probabilistic sensitivity analysis using Monte Carlo sampling (10 000 draws)  
45  
46  
47  
48 of the parameters listed in Table SMM1.  
49  
50  
51  
52  
53  
54  
55  
56  
57  
58  
59  
60

## REFERENCES

1. Fumanelli L, Ajelli M, Manfredi P, et al. Inferring the Structure of Social Contacts from Demographic Data in the Analysis of Infectious Diseases Spread. *PLoS Computational Biology* 2012;8(9):e1002673.
2. Merler S, Ajelli M, Pugliese A, et al. Determinants of the Spatiotemporal Dynamics of the 2009 H1N1 Pandemic in Europe: Implications for Real-Time Modelling. *PLoS Comput Biol* 2011;7(9):e1002205. doi: 10.1371/journal.pcbi.1002205
3. Ferguson NM, Cummings DA, Fraser C, et al. Strategies for mitigating an influenza pandemic. *Nature* 2006;442(7101):448-52.
4. Cauchemez S, Valleron A-J, Boelle P-Y, et al. Estimating the impact of school closure on influenza transmission from Sentinel data. *Nature* 2008;452(7188):750-54. doi: [http://www.nature.com/nature/journal/v452/n7188/supinfo/nature06732\\_S1.html](http://www.nature.com/nature/journal/v452/n7188/supinfo/nature06732_S1.html)
5. Ferguson NM, Cummings DA, Cauchemez S, et al. Strategies for containing an emerging influenza pandemic in Southeast Asia. *Nature* 2005;437(7056):209-14.
6. Statistics Norway. 2014 [Available from: <http://www.ssb.no/>].
7. Ghani A, Baguelin M, Griffin J, et al. The early transmission dynamics of H1N1pdm influenza in the United Kingdom. *PLoS currents* 2009;1
8. Hayward AC, Fragaszy EB, Bermingham A, et al. Comparative community burden and severity of seasonal and pandemic influenza: results of the Flu Watch cohort study. *The Lancet Respiratory Medicine* 2014
9. Longini IM, Nizam A, Xu S, et al. Containing pandemic influenza at the source. *Science* 2005;309(5737):1083-87.
10. de Blasio BF, Iversen BG, Tomba GS. Effect of Vaccines and Antivirals during the Major 2009 A (H1N1) Pandemic Wave in Norway—And the Influence of Vaccination Timing. *PloS one* 2012;7(1):e30018.

- 1  
2  
3 11. Edwards CH, Tomba GS, de Blasio BF. Influenza in workplaces: transmission, workers'  
4 adherence to sick leave advice and European sick leave recommendations. *The*  
5  
6  
7  
8  
9  
10  
11  
12  
13  
14  
15 13. Statistics Norway. Level of living 2009 - Cross sectional study - Working conditions  
16  
17 2012-10-09 ed: Norwegian Social Science Data Services (NSD), 2009.
- 18  
19 14. Brouwer WB, Van Exel N, Koopmanschap M, et al. Productivity costs before and after  
20  
21  
22 absence from work: as important as common? *Health Policy* 2002;61(2):173-87.
- 23  
24 15. Keech M, Scott A, Ryan P. The impact of influenza and influenza-like illness on  
25  
26  
27  
28  
29  
30  
31  
32  
33  
34  
35  
36  
37  
38  
39  
40  
41  
42  
43  
44  
45  
46  
47  
48  
49  
50  
51  
52  
53  
54  
55  
56  
57  
58  
59  
60  
16. Palmer LA, Rousculp MD, Johnston SS, et al. Effect of influenza-like illness and other  
wintertime respiratory illnesses on worker productivity: The child and household  
influenza-illness and employee function (CHIEF) study. *Vaccine* 2010;28(31):5049-  
56.
17. Smith A. A review of the effects of colds and influenza on human performance.  
*Occupational Medicine* 1989;39(2):65-68.
18. Den norske legeforening. Normaltariff for fastleger og legevakt 2013-2014 [Available  
from: [http://normaltariffen.legeforeningen.no/pdf/Fastlegetariff\\_2013.pdf](http://normaltariffen.legeforeningen.no/pdf/Fastlegetariff_2013.pdf)], accessed  
07.07.2014.
19. Romøren TI, Torjesen DO, Landmark B. Promoting coordination in Norwegian health  
care. *International Journal of Integrated Care* 2011;11(Special 10th Anniversary  
Edition)

- 1  
2  
3 20. Foreningen for utgivelse av norsk legemiddelhåndbok. Norsk legemiddel håndbok for  
4  
5 helsepersonell 2013. Oslo: Fagbokforlaget 2013.  
6
- 7  
8 21. Meier CR, Napalkov PN, Wegmüller Y, et al. Population-Based Study on Incidence, Risk  
9  
10 Factors, Clinical Complications and Drug Utilisation Associated with Influenza in the  
11  
12 United Kingdom. *EJCMID* 2000;19(11):834-42. doi: 10.1007/s100960000376  
13
- 14  
15 22. Norwegian Directorate of Health. Innsatsstyrt finansiering 2013, 2012.
- 16  
17 23. Norwegian Directorate for Civil Protection Rapport Ny influensa A (H1N1) 2009  
18  
19 Gjennomgang av erfaringene i Norge. 2. edition ed, 2010.  
20
- 21  
22 24. Baguelin M, Jit M, Miller E, et al. Health and economic impact of the seasonal influenza  
23  
24 vaccination programme in England. *Vaccine* 2012;30(23):3459-62.  
25
- 26  
27 25. Van Hoek AJ, Underwood A, Jit M, et al. The impact of pandemic influenza H1N1 on  
28  
29 health-related quality of life: a prospective population-based study. *PLoS One*  
30  
31 2011;6(3):e17030.  
32
- 33  
34 26. EuroQol Research Foundation. EQ-5D 2015 [Available from: <http://www.euroqol.org/>].
- 35  
36 27. Survey on Living Conditions, Health, Care and Social Contact 2012. *Data collected by*  
37  
38 *Statistics Norway Second NSD edition, Bergen 2014*  
39
- 40  
41 28. Gran JM, Kacelnik O, Grjibovski AM, et al. Counting pandemic deaths: comparing  
42  
43 reported numbers of deaths from influenza A (H1N1) pdm09 with estimated excess  
44  
45 mortality. *Influenza and other respiratory viruses* 2013;7(6):1370-79.  
46
- 47  
48 29. Norwegian Labour and Welfare Administration. Sickness benefits for self-employed and  
49  
50 freelancers. 2015
- 51  
52 30. National Insurance Act. Act 1997-02-28-19. Act relating to national insurance. In: Affairs  
53  
54 MoLaS, ed. Avd I 1997 Nr. 5, LOV-1997-02-28-19.  
55
- 56  
57 31. Intensjonsavtale om et mer inkluderende arbeidsliv 4. mars 2014 - 31. desember 2018 (IA-  
58  
59 avtalen), 2014.  
60



- 1  
2  
3 32. Ose SO, Dyrstad K, Slettebak R, et al. Evaluering av IA-avtalen (2010-2013), 2013:348.  
4  
5 33. Arbeids- og sosialdepartementet. Working Environment act. Act 2005-06-17-62. Act  
6  
7 relating to working environment, working hours an employment protection, etc. as  
8  
9 subsequently amended, last by act 23 February 2007-10. 2005  
10  
11  
12 34. Ministry of Children Equality and Social Inclusion. Meld.St.6 En helhetlig  
13  
14 integreringspolitikk Mangfold og fellesskap, 2013.  
15  
16  
17  
18  
19  
20  
21  
22  
23  
24  
25  
26  
27  
28  
29  
30  
31  
32  
33  
34  
35  
36  
37  
38  
39  
40  
41  
42  
43  
44  
45  
46  
47  
48  
49  
50  
51  
52  
53  
54  
55  
56  
57  
58  
59  
60

For peer review only

1  
2  
3  
4  
5  
6  
7  
8  
9

## Evaluating costs and health consequences of sick leave strategies against pandemic and seasonal influenza in Norway using a dynamic model

10  
11  
12  
13  
14  
15  
16  
17  
18  
19  
20  
21  
22  
23  
24  
25  
26  
27  
28  
29  
30  
31  
32  
33  
34  
35  
36  
37  
38  
39  
40  
41  
42  
43  
44  
45  
46  
47  
48  
49  
50  
51  
52  
53  
54  
55  
56  
57  
58  
59  
60

Christina Hansen Edwards<sup>1</sup>, Gianpaolo Scalia Tomba<sup>2</sup>, Ivar Sønnebø Kristiansen<sup>3</sup>, Richard White<sup>4</sup>, Birgitte Freiesleben de Blasio<sup>4,5</sup>

<sup>1</sup>Department of Health and Inequality, Norwegian Institute of Public Health, P.O. Box 0403. 4403 Nydalen, Oslo, Norway.

<sup>2</sup>Department of Mathematics, University of Rome Tor Vergata, Via Ricerca Scientifica 00133 Roma, Italy.

<sup>3</sup>Department of Health Management and Health Economics, Institute for Health and Society, University of Oslo. P.O.Box 1130. 0318 Blindern, Oslo, Norway.

<sup>4</sup>Department of Infectious Disease Epidemiology and Modelling, Norwegian Institute of Public Health, P.O. Box 0403. 4403 Nydalen, Oslo, Norway.

<sup>5</sup>Oslo Centre for Biostatistics and Epidemiology. Department of Biostatistics. Institute of Basic Medical Sciences. University of Oslo. P.O.Box 1122. 0317 Blindern, Oslo, Norway.

Correspondence to: CH Edwards [Christina.Hansen.Edwards@fhi.no](mailto:Christina.Hansen.Edwards@fhi.no)

### SUPPLEMENTARY FILE 2: FIGURES

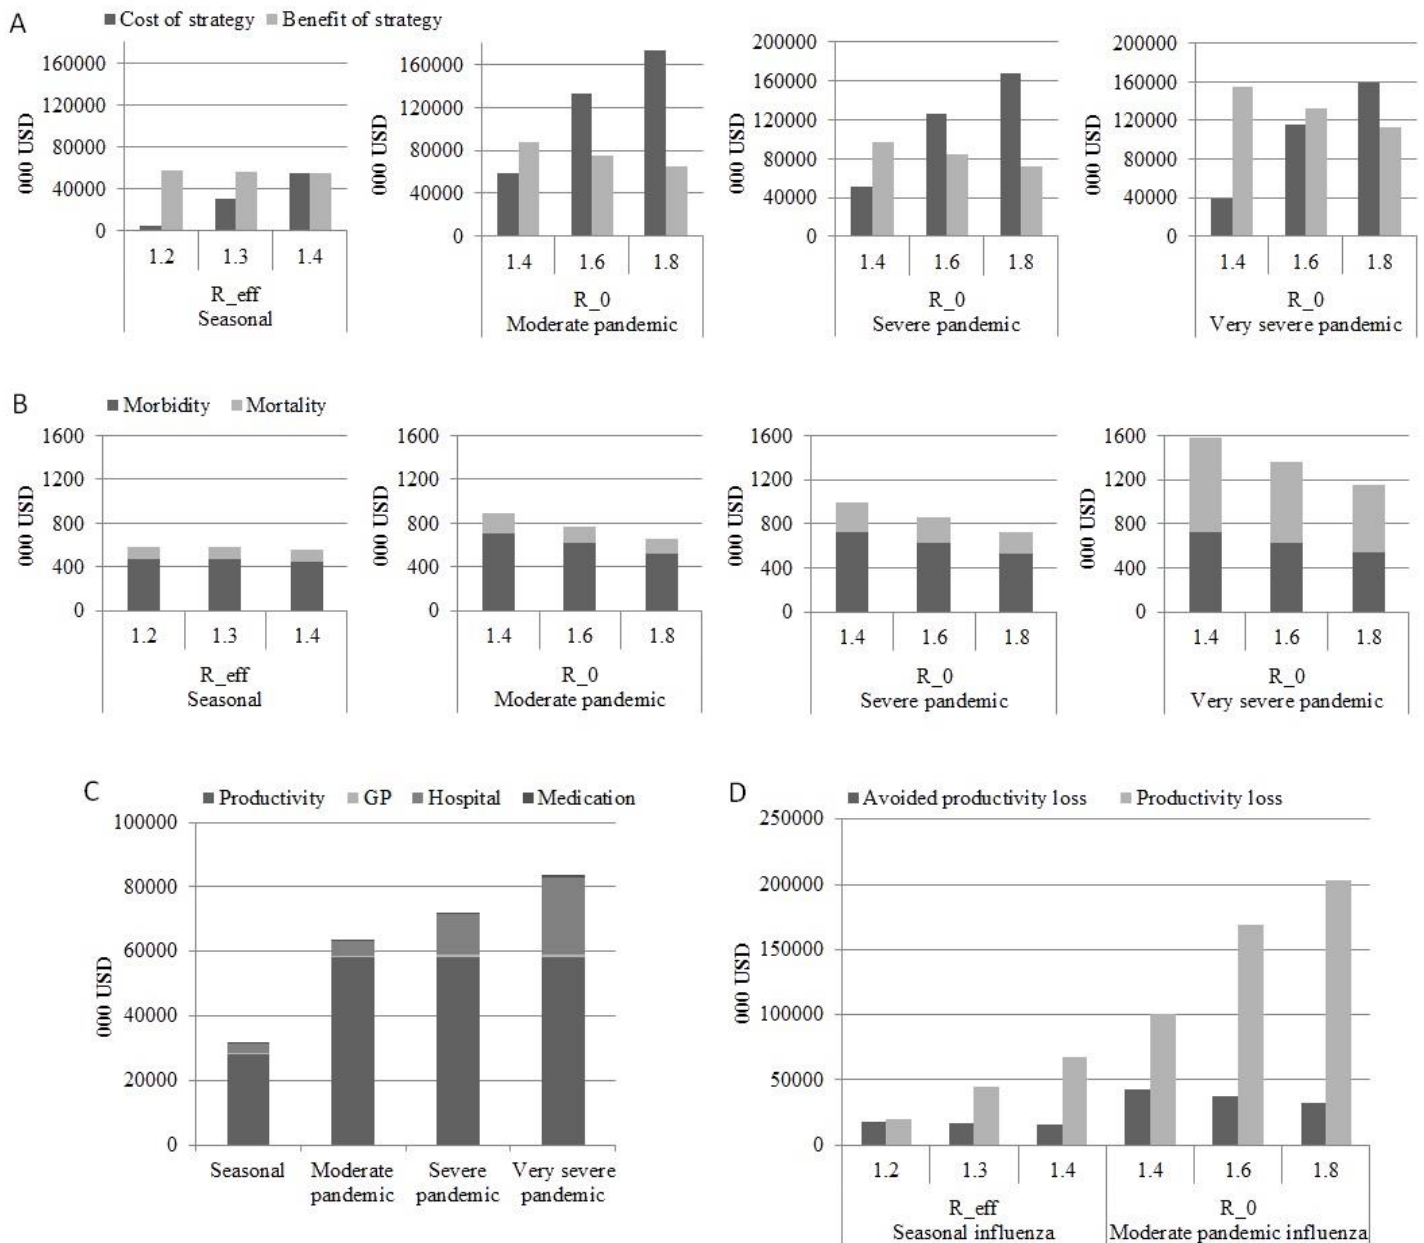

**Figure S1: The effect transmissibility and pandemic severity on economic parameters for the intervention involving 90% of sick persons taking sick leave within 0.5 days of onset; no extra mixing assumed.** A) Total monetary costs and benefits of the intervention under seasonal and pandemic scenarios. B) Benefits from avoided morbidity and mortality under seasonal and pandemic scenarios. C) Proportion of costs avoided due to avoided hospitalizations, GP-visits, medication use and productivity losses under seasonal and pandemic influenza. D) Baseline productivity losses and productivity losses avoided due to the sick leave intervention under seasonal and moderate pandemic influenza (the same pattern follows for more severe pandemic influenza scenarios).

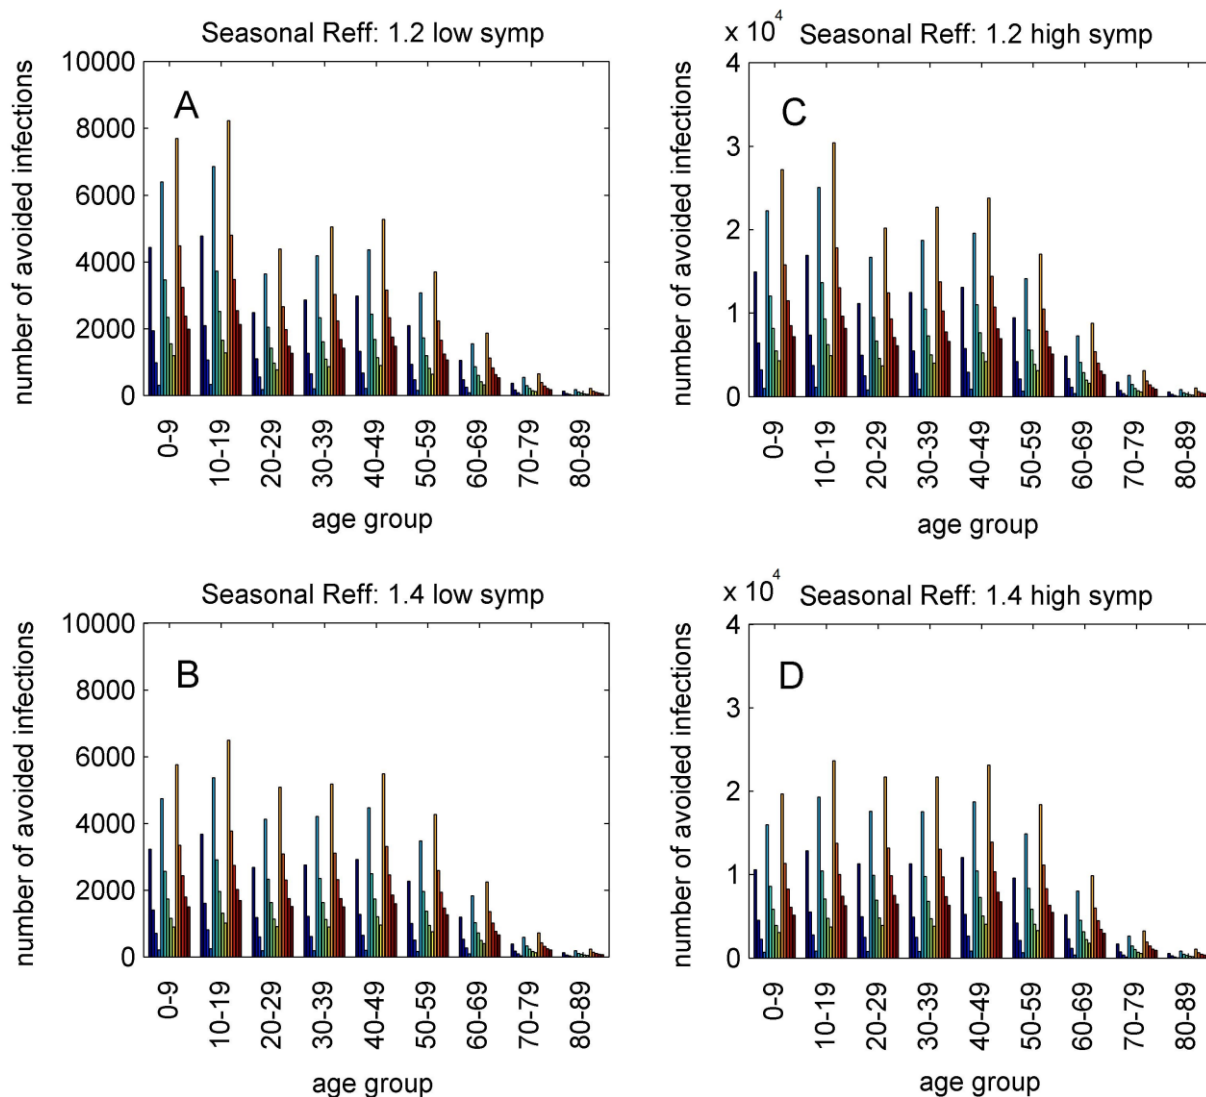

**Figure S2: Absolute number of avoided clinical cases for selected seasonal scenarios, grouped according to median age, for all 14 interventions.**

Interventions 1-4: Shades of blue: (65%; 0.5, 1, 1.5, and 2 days)

Interventions 5-9: Shades of green to yellow: (80%; 0.5, 1, 1.5, 2, and 4 days)

Interventions 10-14: Shades of orange to red: (90%; 0.5, 1, 1.5, 2, and 4 days)



**Figure S3: Absolute number of avoided clinical cases for selected pandemic scenarios, grouped according to median age, for all 14 interventions.**

Interventions 1-4: Shades of blue: (65%; 0.5, 1, 1.5, and 2 days)

Interventions 5-9: Shades of green to yellow: (80%; 0.5, 1, 1.5, 2, and 4 days)

Interventions 10-14: Shades of orange to red: (90%; 0.5, 1, 1.5, 2, and 4 days)

**Figure S4:**  
**Acceptability curves**  
**without extra**  
**mixing.**

A) Seasonal influenza ( $R_{eff}=1.3$ ), low symptomatic proportions (35% children and 25% adults symptomatic), without extra mixing, B) Seasonal influenza ( $R_{eff}=1.3$ ), high symptomatic proportions (65% children and 55% adults symptomatic) without extra mixing, C) Pandemic influenza ( $R_0=1.6$ ), low symptomatic proportions (35% children and 25% adults symptomatic), without extra mixing, D) Pandemic influenza ( $R_0=1.6$ ), high symptomatic proportions (65% children and 55% adults symptomatic) without extra mixing.

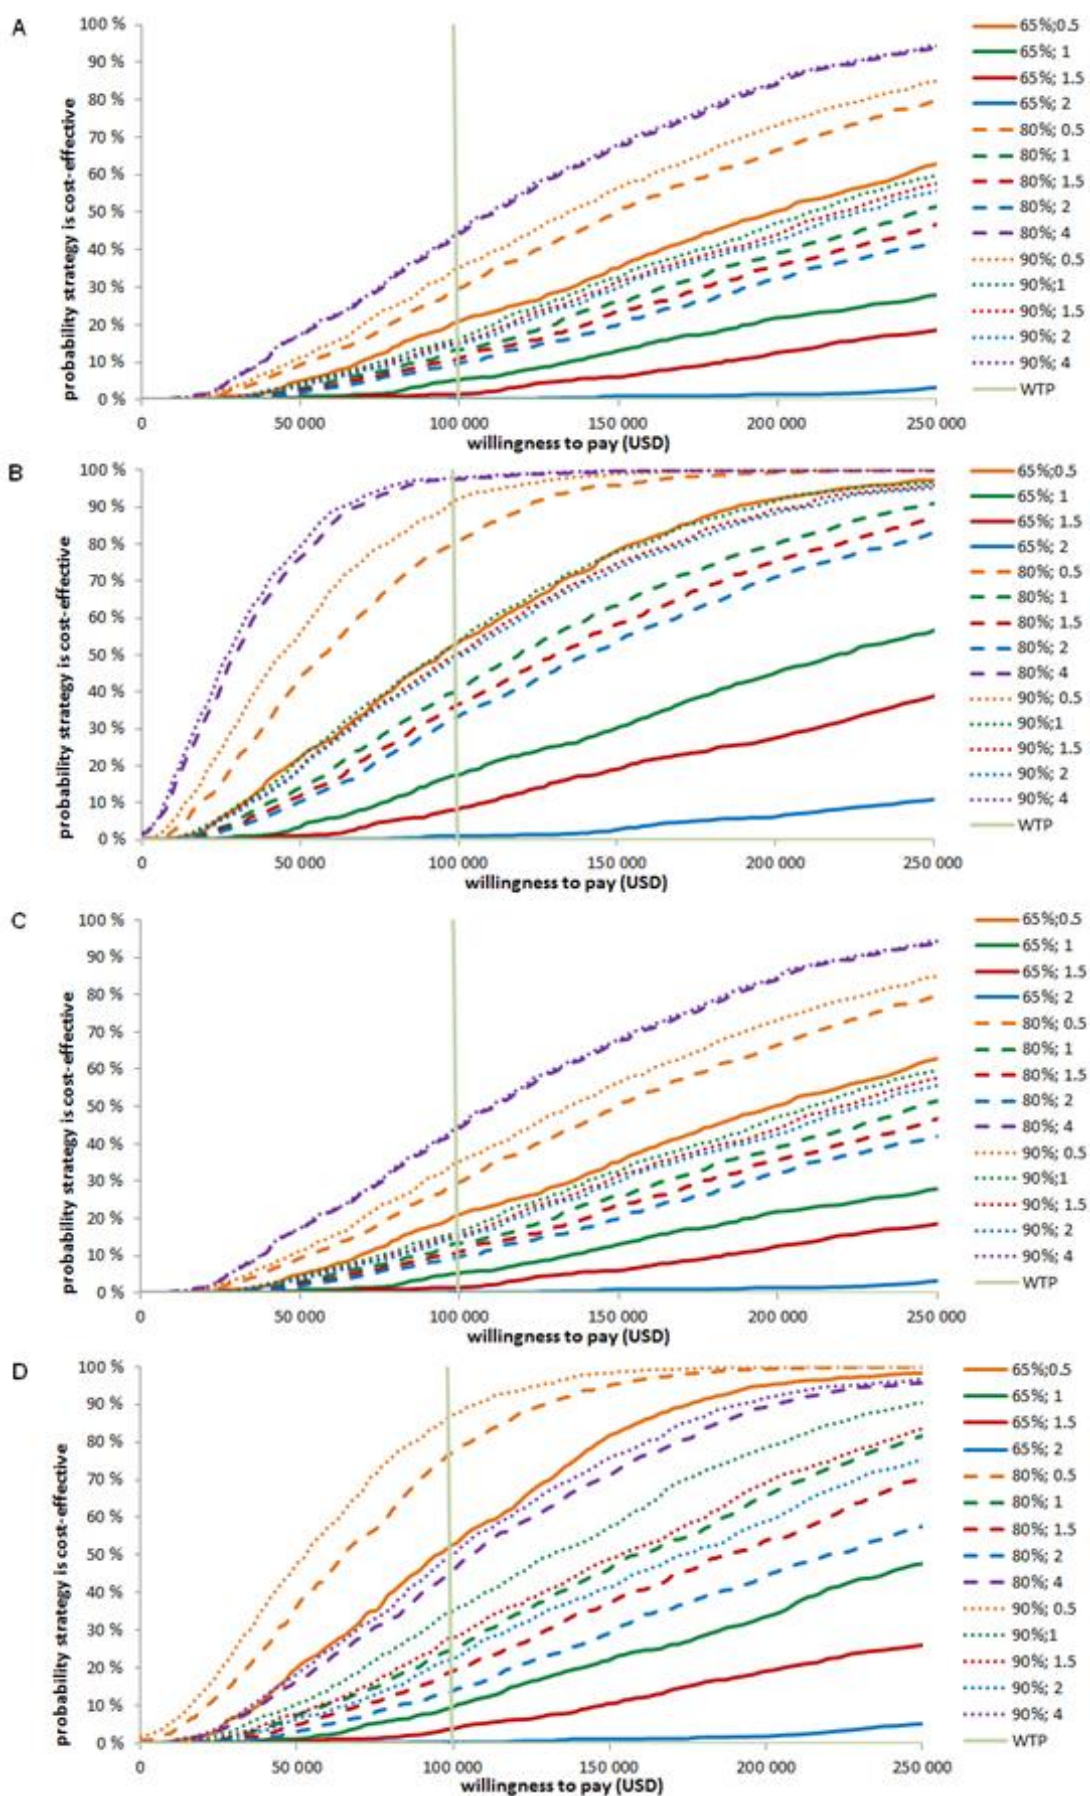

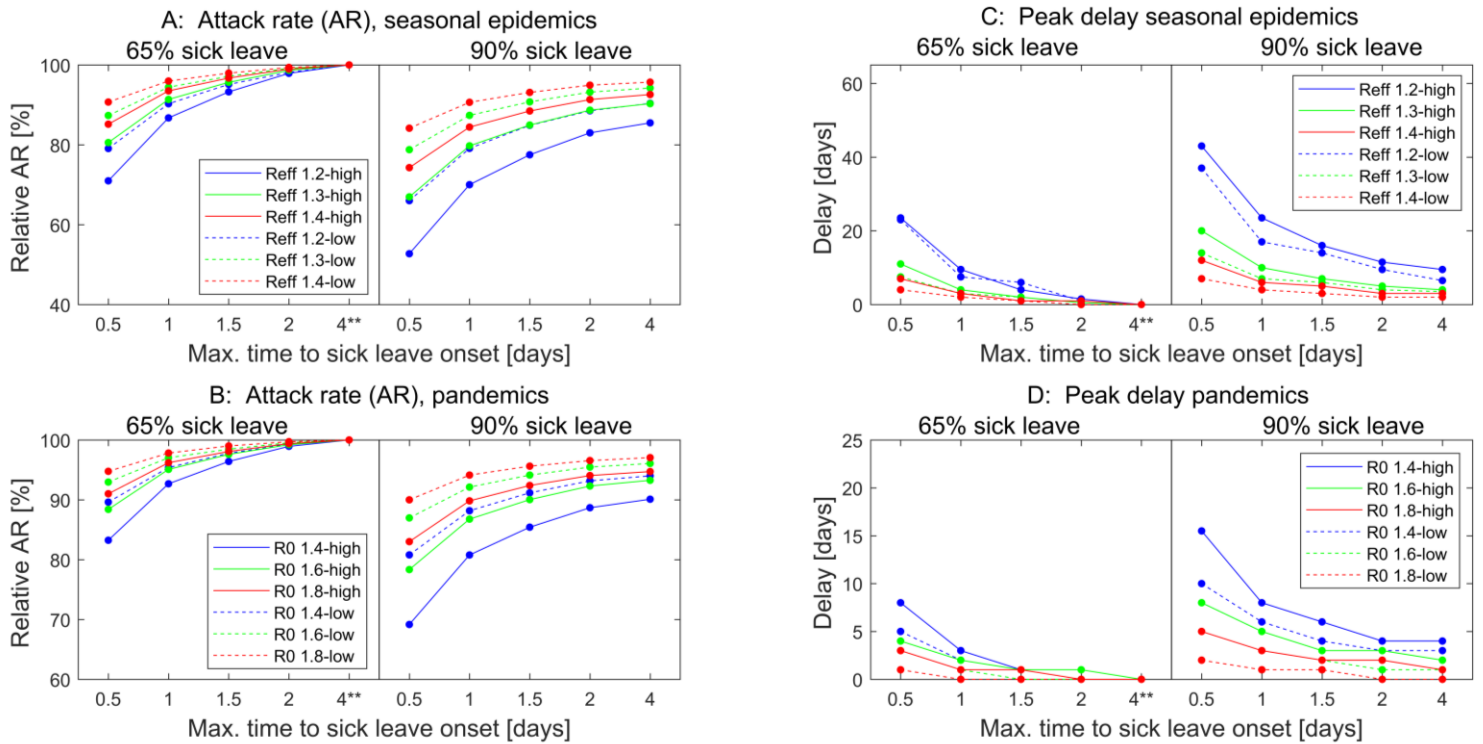

**Figure S5: Impact of workplace-based interventions on clinical attack rate and timing of peak for seasonal epidemics (panels A and C) and for pandemics (panels B and D) with extra mixing in the households and the general population.** Scenarios assuming low symptomatic proportions (35% children, 25% adults develop symptoms) are depicted with stippled lines; scenarios assuming high symptomatic proportions (65% children, 55% adults develop symptoms) are depicted with solid lines. Each level of transmissibility has a unique colour (blue = lowest transmissibility, green = medium transmissibility, and red = highest transmissibility). The figure shows sick leave interventions with 65% and 90% adherence combined with absence onset within 0.5, 1, 1.5, 2, and 4 days. The baseline intervention (65% adherence and sick leave onset within 4 days of symptom onset) is indicated by \*\*.

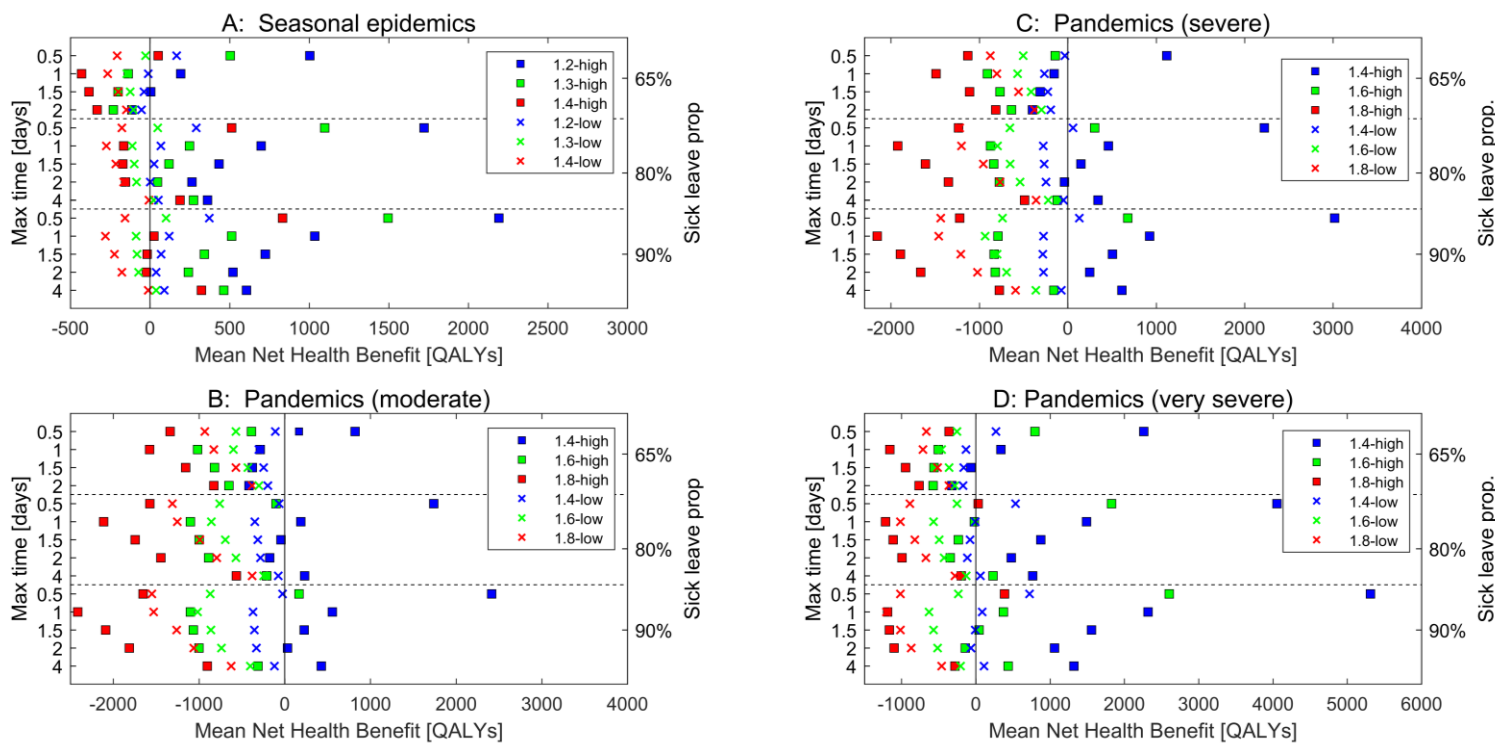

**Figure S6: Mean Net Health Benefit (NHB) of workplace-based interventions for all scenarios assuming extra mixing in households and the general population; seasonal epidemics (A), moderate pandemics (B), severe pandemics (C), very severe pandemics (D).**

Scenarios assuming low symptomatic proportions (35% children, 25% adults develop symptoms) are depicted as crosses, and scenarios assuming high symptomatic proportions (65% children, 55% adults develop symptoms) are depicted as squares. Each level of transmissibility has a unique colour (blue = lowest transmissibility, green = medium transmissibility, and red = highest transmissibility)



**Figure S7:**  
**Acceptability curves**  
**with mixing.**

A) Seasonal influenza ( $R_{eff}=1.3$ ), low symptomatic proportions (35% children and 25% adults symptomatic), without extra mixing, B) Seasonal influenza ( $R_{eff}=1.3$ ), high symptomatic proportions (65% children and 55% adults symptomatic) without extra mixing, C) Pandemic influenza ( $R_0=1.6$ ), low symptomatic proportions (35% children and 25% adults symptomatic), without extra mixing, D) Pandemic influenza ( $R_0=1.6$ ), high symptomatic proportions (65% children and 55% adults symptomatic) without extra mixing.

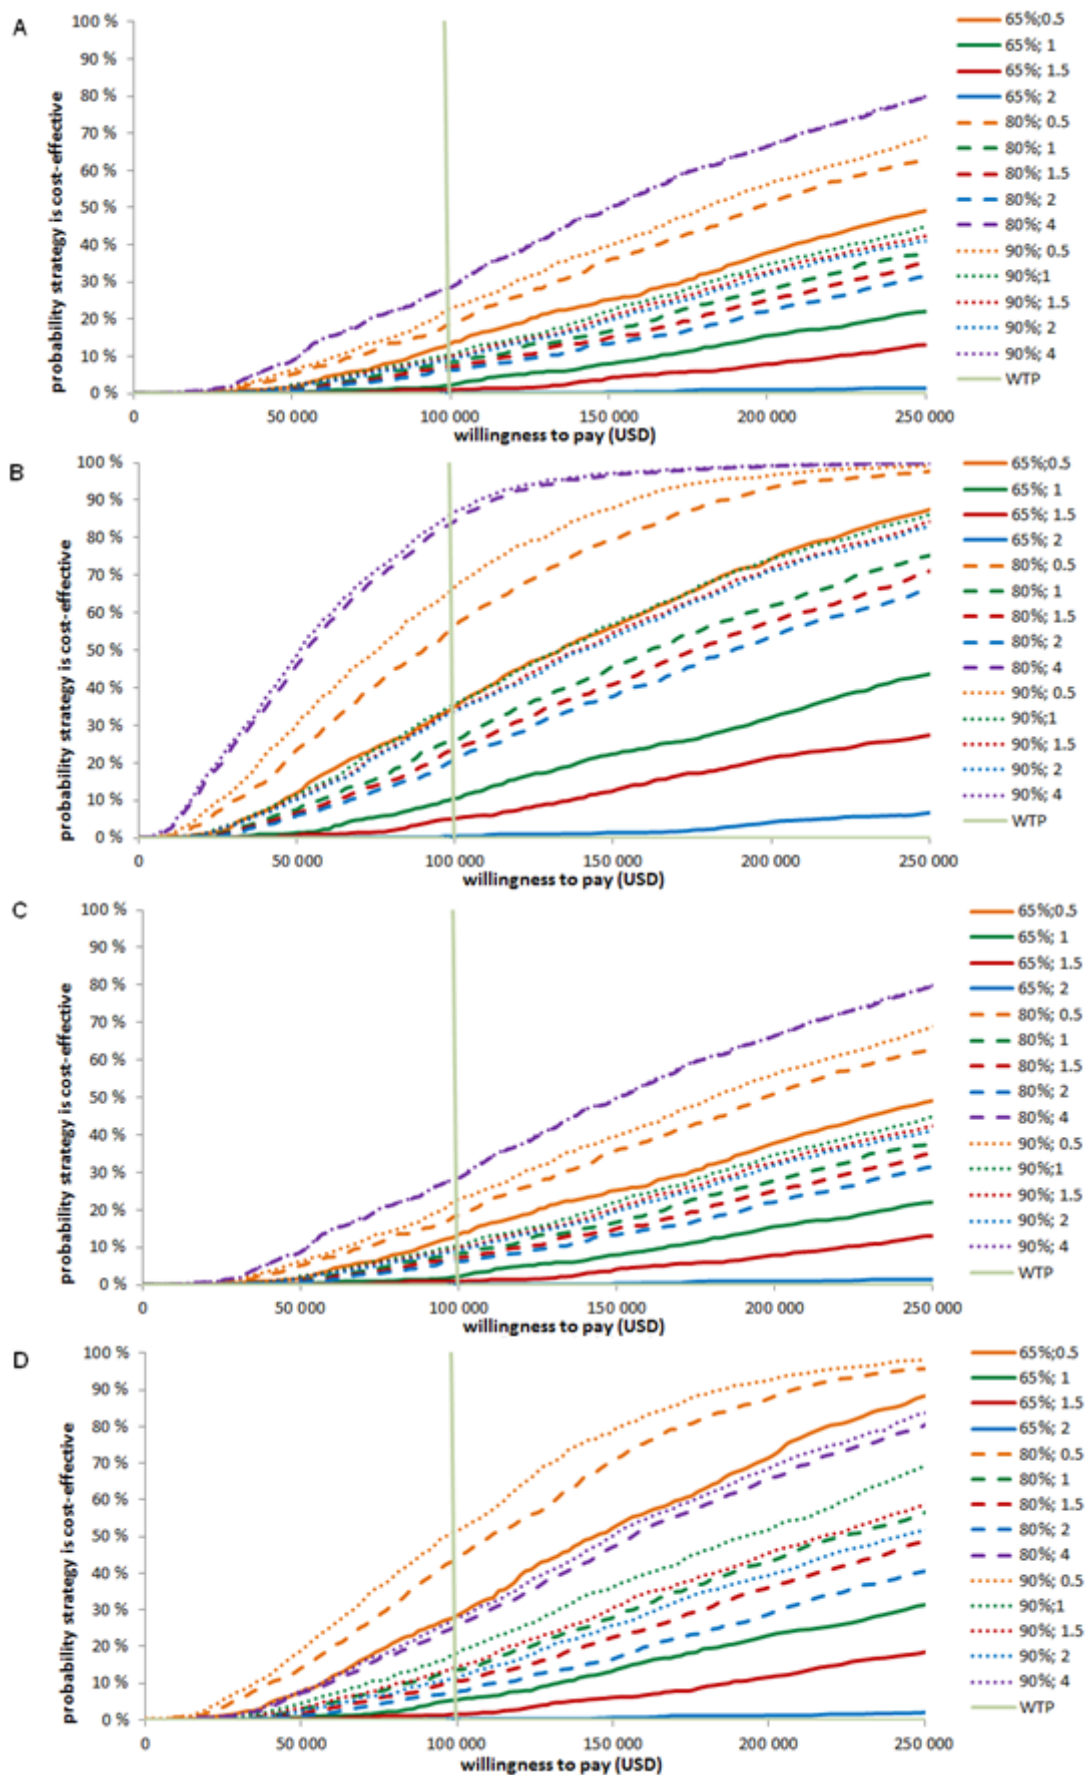

1  
2  
3  
4  
5  
6  
7  
8  
9  
10  
11  
12  
13  
14  
15  
16  
17  
18  
19  
20  
21  
22  
23  
24  
25  
26  
27  
28  
29  
30  
31  
32  
33  
34  
35  
36  
37  
38  
39  
40  
41  
42  
43  
44  
45  
46  
47  
48  
49  
50  
51  
52  
53  
54  
55  
56  
57  
58  
59  
60

For peer review only

CHEERS checklist—Items to include when reporting economic evaluations of health interventions

| Section/item                    | Item No | Recommendation                                                                                                                                                                             | Reported on page No/ line No   |
|---------------------------------|---------|--------------------------------------------------------------------------------------------------------------------------------------------------------------------------------------------|--------------------------------|
| <b>Title and abstract</b>       |         |                                                                                                                                                                                            |                                |
| Title                           | 1       | Identify the study as an economic evaluation or use more specific terms such as “cost-effectiveness analysis”, and describe the interventions compared.                                    | 1                              |
| Abstract                        | 2       | Provide a structured summary of objectives, perspective, setting, methods (including study design and inputs), results (including base case and uncertainty analyses), and conclusions.    | 2 & 3                          |
| <b>Introduction</b>             |         |                                                                                                                                                                                            |                                |
| Background and objectives       | 3       | Provide an explicit statement of the broader context for the study.                                                                                                                        | 5 & 6                          |
|                                 |         | Present the study question and its relevance for health policy or practice decisions.                                                                                                      | 5 & 6                          |
| <b>Methods</b>                  |         |                                                                                                                                                                                            |                                |
| Target population and subgroups | 4       | Describe characteristics of the base case population and subgroups analysed, including why they were chosen.                                                                               | 7 & 8                          |
| Setting and location            | 5       | State relevant aspects of the system(s) in which the decision(s) need(s) to be made.                                                                                                       | 6, 7, 8 & Supplementary file 1 |
| Study perspective               | 6       | Describe the perspective of the study and relate this to the costs being evaluated.                                                                                                        | 10                             |
| Comparators                     | 7       | Describe the interventions or strategies being compared and state why they were chosen.                                                                                                    | 6, 8 & 9                       |
| Time horizon                    | 8       | State the time horizon(s) over which costs and consequences are being evaluated and say why appropriate.                                                                                   | 7,8 & 9                        |
| Discount rate                   | 9       | Report the choice of discount rate(s) used for costs and outcomes and say why appropriate.                                                                                                 | Supplementary file 1           |
| Choice of health outcomes       | 10      | Describe what outcomes were used as the measure(s) of benefit in the evaluation and their relevance for the type of analysis performed.                                                    | 10 & Supplementary file 1      |
| Measurement of effectiveness    | 11a     | <i>Single study-based estimates:</i> Describe fully the design features of the single effectiveness study and why the single study was a sufficient source of clinical effectiveness data. | 9, 10 & Supplementary file 1   |

|                                                        |     |                                                                                                                                                                                                                                                                                                                                                       |                              |
|--------------------------------------------------------|-----|-------------------------------------------------------------------------------------------------------------------------------------------------------------------------------------------------------------------------------------------------------------------------------------------------------------------------------------------------------|------------------------------|
|                                                        | 11b | <i>Synthesis-based estimates:</i> Describe fully the methods used for identification of included studies and synthesis of clinical effectiveness data.                                                                                                                                                                                                | 9, 10 & Supplementary file 1 |
| Measurement and valuation of preference based outcomes | 12  | If applicable, describe the population and methods used to elicit preferences for outcomes.                                                                                                                                                                                                                                                           | NA                           |
| Estimating resources and costs                         | 13a | <i>Single study-based economic evaluation:</i> Describe approaches used to estimate resource use associated with the alternative interventions. Describe primary or secondary research methods for valuing each resource item in terms of its unit cost. Describe any adjustments made to approximate to opportunity costs.                           | NA                           |
|                                                        | 13b | <i>Model-based economic evaluation:</i> Describe approaches and data sources used to estimate resource use associated with model health states. Describe primary or secondary research methods for valuing each resource item in terms of its unit cost. Describe any adjustments made to approximate to opportunity costs.                           | 9,10, & Supplementary file 1 |
| Currency, price date, and conversion                   | 14  | Report the dates of the estimated resource quantities and unit costs. Describe methods for adjusting estimated unit costs to the year of reported costs if necessary. Describe methods for converting costs into a common currency base and the exchange rate.                                                                                        | 10 & Supplementary file 1    |
| Choice of model                                        | 15  | Describe and give reasons for the specific type of decision-analytical model used. Providing a figure to show model structure is strongly recommended.                                                                                                                                                                                                | 9, 10 & Supplementary file 1 |
| Assumptions                                            | 16  | Describe all structural or other assumptions underpinning the decision-analytical model.                                                                                                                                                                                                                                                              | 7-10 & Supplementary file 1  |
| Analytical methods                                     | 17  | Describe all analytical methods supporting the evaluation. This could include methods for dealing with skewed, missing, or censored data; extrapolation methods; methods for pooling data; approaches to validate or make adjustments (such as half cycle corrections) to a model; and methods for handling population heterogeneity and uncertainty. | 7-10 & Supplementary file 1  |

| <b>Results</b>                                                       |     |                                                                                                                                                                                                                                                                             |                                                            |
|----------------------------------------------------------------------|-----|-----------------------------------------------------------------------------------------------------------------------------------------------------------------------------------------------------------------------------------------------------------------------------|------------------------------------------------------------|
| Study parameters                                                     | 18  | Report the values, ranges, references, and, if used, probability distributions for all parameters. Report reasons or sources for distributions used to represent uncertainty where appropriate. Providing a table to show the input values is strongly recommended.         | Supplementary file 1                                       |
| Incremental costs and outcomes                                       | 19  | For each intervention, report mean values for the main categories of estimated costs and outcomes of interest, as well as mean differences between the comparator groups. If applicable, report incremental cost-effectiveness ratios.                                      | 11-15, Fig. 3 & Supplementary file 2                       |
| Characterising uncertainty                                           | 20a | <i>Single study-based economic evaluation:</i> Describe the effects of sampling uncertainty for the estimated incremental cost and incremental effectiveness parameters, together with the impact of methodological assumptions (such as discount rate, study perspective). | NA                                                         |
|                                                                      | 20b | <i>Model-based economic evaluation:</i> Describe the effects on the results of uncertainty for all input parameters, and uncertainty related to the structure of the model and assumptions.                                                                                 | 14-16, Fig. 4 & Supplementary file 2, Supplementary file 3 |
| Characterising heterogeneity                                         | 21  | If applicable, report differences in costs, outcomes, or cost-effectiveness that can be explained by variations between subgroups of patients with different baseline characteristics or other observed variability in effects that are not reducible by more information.  | 17-19                                                      |
| <b>Discussion</b>                                                    |     |                                                                                                                                                                                                                                                                             |                                                            |
| Study findings, limitations, generalisability, and current knowledge | 22  | Summarise key study findings and describe how they support the conclusions reached. Discuss limitations and the generalisability of the findings and how the findings fit with current knowledge.                                                                           | 16-20                                                      |
| <b>Other</b>                                                         |     |                                                                                                                                                                                                                                                                             |                                                            |
| Source of funding                                                    | 23  | Describe how the study was funded and the role of the funder in the identification, design, conduct, and reporting of the analysis. Describe other non-monetary sources of support.                                                                                         | 22                                                         |
| Conflicts of interest                                                | 24  | Describe any potential for conflict of interest of study contributors in accordance with journal policy. In the absence of a journal policy, we                                                                                                                             | 22                                                         |

1  
2  
3  
4  
5  
6  
7  
8  
9  
10  
11  
12  
13  
14  
15  
16  
17  
18  
19  
20  
21  
22  
23  
24  
25  
26  
27  
28  
29  
30  
31  
32  
33  
34  
35  
36  
37  
38  
39  
40  
41  
42  
43  
44  
45  
46  
47  
48  
49  
50  
51  
52  
53  
54  
55  
56  
57  
58  
59  
60

|  |  |                                                                                                   |  |
|--|--|---------------------------------------------------------------------------------------------------|--|
|  |  | recommend authors comply with International Committee of Medical Journal Editors recommendations. |  |
|--|--|---------------------------------------------------------------------------------------------------|--|

For consistency, the CHEERS statement checklist format is based on the format of the CONSORT statement checklist

For peer review only
